# Supplementary material for: Identification of novel key markers that are induced during traumatic brain injury in mice
Source: PeerJ. 2023 Aug 25;11:e15981. doi: 10.7717/peerj.15981 (PMC10461542; doi:10.7717/peerj.15981)
Supplement: Supplemental Information 3 [file peerj-11-15981-s003.xlsx]

## Sheet: TGM1
Figure 2a
Relative value of TGM1	Control	TBI
	1	2.14
	0.25	5.34
	0.21	2.48
	0.09	2.55
	0.16	3.66
	0.22	3.38
	1.4	5.84
	0.96	0.97
	0.77	3.03
	0.93	2.09
	1.59	4.31
	1.33	4.26

## Sheet: TGM2
Figure 2b
Relative value of TGM2	Control	TBI
	1	2.16
	1.52	0.9
	1.14	4.43
	1.34	2.1
	0.84	2.97
	1.46	3.96
	1.11	2.18
	0.27	2.46
	0.18	2.96
	1.38	4.15
	0.43	2.2
	0.16	2.32

## Sheet: ATF3
Figure 2c
Relative value of ATF3	Control	TBI
	1	2.16
	1.29	4.39
	0.41	1.24
	0.17	4.43
	0.24	2.97
	1.17	1.7
	0.28	2.93
	1.01	5.58
	1.33	1.7
	1.06	4.41
	1.03	2.2
	0.24	2.36

## Sheet: RCN3
Figure 2d
Relative value of RCN3	Control	TBI
	1	3.06
	1.29	1.74
	0.69	1.33
	0.24	4.29
	0.71	4.94
	0.69	1.72
	1.01	1.8
	0.91	2.69
	1.33	2.66
	1.03	2.16
	1.13	1.39
	1.93	3.21

## Sheet: ORAI1
Figure 2e
Relative value of ORAI3	Control	TBI
	1	0.41
	0.88	3.75
	0.65	0.81
	1.14	2.24
	0.59	4.51
	0.38	3.15
	1.3	7.32
	1.08	2.03
	1.36	3.37
	1.47	0.23
	0.9	0.92
	1.63	6.96

## Sheet: ITPR3
Figure 2f
Relative value of ITPR3	Control	TBI
	1	4.49
	0.39	6.5
	0.41	5.37
	0.69	4.16
	1.8	3.74
	0.71	1.15
	0.47	1.1
	0.74	1.14
	1.67	5.2
	1.75	9.07
	1.22	3.74
	1.45	4.01

## Sheet: NF-KB1
Figure 2g
Relative value of NF-Kb1	Control	TBI
	1	3.3
	0.87	3.88
	1.44	2.16
	0.01	2.53
	0.03	1.41
	0.04	1.76
	0.06	3.9
	0.04	2.4
	0.13	5.44
	0.73	0.97
	0.11	4.26
	0.17	1.48

## Sheet: RELA
Figure 2h
Relative value of RELA	Control	TBI
	1	3.23
	0.12	3.08
	2.96	3.85
	5.36	8.67
	3.04	4.16
	0.94	3.49
	0.24	3.13
	6.2	3.62
	0.37	4.27
	1.3	7.49
	3.6	7.1
	4.92	2.37

## Sheet: ROC curve
TGM1	TGM2	ATF3	RCN3	ORAI1	ITPR3	NFKB1	RELA	State variable
0.25	1.52	1.29	1.29	0.88	0.39	0.87	0.12	1
0.21	1.14	1	1	0.65	0.41	1.44	2.96	1
0.09	1.34	0.41	0.69	1.14	0.69	0.01	5.36	1
0.16	0.84	0.17	0.24	0.59	1.8	0.03	3.04	1
0.22	1.46	0.24	0.71	0.38	1	0.04	0.94	1
1.4	1.11	1.17	0.69	1.3	0.71	0.06	0.24	1
0.96	0.27	0.28	1.01	1.08	0.47	0.04	6.2	1
0.77	0.18	1.01	0.91	1	0.74	1	0.37	1
1	1.38	1.33	1.33	1.36	1.67	0.13	1.3	1
0.93	0.43	1.06	1.03	1.47	1.75	0.73	1	1
1.59	0.16	1.03	1.13	0.9	1.22	0.11	3.6	1
1.33	1	0.24	1.93	1.63	1.45	0.17	4.92	1
2.14	2.16	2.16	3.06	0.41	4.49	3.3	3.23	2
5.34	0.9	4.39	1.74	3.75	6.5	3.88	3.08	2
2.48	4.43	1.24	1.33	0.81	5.37	2.16	3.85	2
2.55	2.1	4.43	4.29	2.24	4.16	2.53	8.67	2
3.66	2.97	2.97	4.94	4.51	3.74	1.41	4.16	2
3.38	3.96	1.7	1.72	3.15	1.15	1.76	3.49	2
5.84	2.18	2.93	1.8	7.32	1.1	3.9	3.13	2
0.97	2.46	5.58	2.69	2.03	1.14	2.4	3.62	2
3.03	2.96	1.7	2.66	3.37	5.2	5.44	4.27	2
2.09	4.15	4.41	2.16	0.23	9.07	0.97	7.49	2
4.31	2.2	2.2	1.39	0.92	3.74	4.26	7.1	2
4.26	2.32	2.36	3.21	6.96	4.01	1.48	2.37	2
