# Supplementary material for: Identification of novel key markers that are induced during traumatic brain injury in mice
Source: PeerJ. 2023 Aug 25;11:e15981. doi: 10.7717/peerj.15981 (PMC10461542; doi:10.7717/peerj.15981)
Supplement: Supplemental Information 4 [file peerj-11-15981-s004.xlsx]

## Sheet: ORAI1 brain nocancer
Query genes:
Query Gene	Entrez ID	Coexpression Score	P-Value	Description
ORAI1	84876	-3.2	0	ORAI calcium release-activated calcium modulator 1
Coexpressed genes:
Rank	Gene	Entrez ID	Coexpression Score	P-Value	Description
1	SIPA1	6494	1.1954	0.0001	signal-induced proliferation-associated 1								SIPA1	1.1954
2	PRKD2	25865	1.1615	0.0007	protein kinase D2								PRKD2	1.1615
3	CORO1B	57175	1.157	0.0005	coronin, actin binding protein, 1B								CORO1B	1.157
4	HMG20B	10362	1.1564	0.0002	high mobility group 20B								HMG20B	1.1564
5	VASP	7408	1.1483	0.0001	vasodilator-stimulated phosphoprotein								VASP	1.1483
6	GPSM3	63940	1.1138	0.0044	G-protein signaling modulator 3								GPSM3	1.1138
7	BCL7C	9274	1.099	0.0001	B-cell CLL/lymphoma 7C								BCL7C	1.099
8	NFKB2	4791	1.0981	0.0022	nuclear factor of kappa light polypeptide gene enhancer in B-cells 2 (p49/p100)								NFKB2	1.0981
9	POLD1	5424	1.0895	0.0027	polymerase (DNA directed), delta 1, catalytic subunit								POLD1	1.0895
10	C15ORF39	56905	1.0817	0.0002	chromosome 15 open reading frame 39								C15ORF39	1.0817
11	RAVER1	125950	1.0714	0.0006	ribonucleoprotein, PTB-binding 1								RAVER1	1.0714
12	SLC10A3	8273	1.0702	0.0003	solute carrier family 10 (sodium/bile acid cotransporter family), member 3								SLC10A3	1.0702
13	TMUB1	83590	1.066	0.0026	transmembrane and ubiquitin-like domain containing 1								TMUB1	1.066
14	MPST	4357	1.0535	0.0003	mercaptopyruvate sulfurtransferase								MPST	1.0535
15	RBM38	55544	1.0502	0	RNA binding motif protein 38								RBM38	1.0502
16	PXN	5829	1.0501	0.0004	paxillin								PXN	1.0501
17	ZNF581	51545	1.05	0.0007	zinc finger protein 581								ZNF581	1.05
18	IFRD2	7866	1.0488	0.0032	interferon-related developmental regulator 2								IFRD2	1.0488
19	TBC1D10C	374403	1.048	0.0025	TBC1 domain family, member 10C								TBC1D10C	1.048
20	ZDHHC12	84885	1.0416	0.0045	zinc finger, DHHC-type containing 12								ZDHHC12	1.0416
21	FXYD5	53827	1.0415	0.0018	FXYD domain containing ion transport regulator 5								FXYD5	1.0415
22	FAM125A	93343	1.0381	0.0013	family with sequence similarity 125, member A								FAM125A	1.0381
23	MFNG	4242	1.0375	0.0006	MFNG O-fucosylpeptide 3-beta-N-acetylglucosaminyltransferase								MFNG	1.0375
24	PGLS	25796	1.0349	0.0049	6-phosphogluconolactonase								PGLS	1.0349
25	CYBA	1535	1.0286	0.001	cytochrome b-245, alpha polypeptide								CYBA	1.0286
26	SBNO2	22904	1.0267	0.0088	strawberry notch homolog 2 (Drosophila)								SBNO2	1.0267
27	CLN3	1201	1.0267	0.0019	ceroid-lipofuscinosis, neuronal 3								CLN3	1.0267
28	GYPC	2995	1.0252	0.0005	glycophorin C (Gerbich blood group)								GYPC	1.0252
29	PPP1R18	170954	1.0241	0.007	protein phosphatase 1, regulatory subunit 18								PPP1R18	1.0241
30	RALY	22913	1.0205	0.0046	RNA binding protein, autoantigenic (hnRNP-associated with lethal yellow homolog (mouse))								RALY	1.0205
31	CTDSP1	58190	1.0199	0.004	CTD (carboxy-terminal domain, RNA polymerase II, polypeptide A) small phosphatase 1								CTDSP1	1.0199
32	SMTN	6525	1.0132	0.0008	smoothelin								SMTN	1.0132
33	SLC25A1	6576	1.0083	0.0042	solute carrier family 25 (mitochondrial carrier; citrate transporter), member 1								SLC25A1	1.0083
34	RNPEPL1	57140	1.0068	0.0144	arginyl aminopeptidase (aminopeptidase B)-like 1								RNPEPL1	1.0068
35	PPP4C	5531	1.0046	0.006	protein phosphatase 4, catalytic subunit								PPP4C	1.0046
36	LMF2	91289	1.0023	0.0257	lipase maturation factor 2								LMF2	1.0023
37	RIN3	79890	1.0006	0.0031	Ras and Rab interactor 3								RIN3	1.0006
38	POLD4	57804	1.0001	0.0096	polymerase (DNA-directed), delta 4, accessory subunit								POLD4	1.0001
39	SLC4A2	6522	0.9998	0.0019	solute carrier family 4, anion exchanger, member 2 (erythrocyte membrane protein band 3-like 1)								SLC4A2	0.9998
40	NFATC1	4772	0.9995	0.0001	nuclear factor of activated T-cells, cytoplasmic, calcineurin-dependent 1								NFATC1	0.9995
41	SHKBP1	92799	0.9978	0.0048	SH3KBP1 binding protein 1								SHKBP1	0.9978
42	SASH3	54440	0.9942	0.0093	SAM and SH3 domain containing 3								SASH3	0.9942
43	TSPO	706	0.9931	0.0069	translocator protein (18kDa)								TSPO	0.9931
44	MAN2B1	4125	0.9917	0.0109	mannosidase, alpha, class 2B, member 1								MAN2B1	0.9917
45	TTC38	55020	0.9886	0.0002	tetratricopeptide repeat domain 38								TTC38	0.9886
46	TCF3	6929	0.9831	0.0014	transcription factor 3 (E2A immunoglobulin enhancer binding factors E12/E47)								TCF3	0.9831
47	FCGRT	2217	0.9827	0.0083	Fc fragment of IgG, receptor, transporter, alpha								FCGRT	0.9827
48	FAM176B	55194	0.9774	0.0067	family with sequence similarity 176, member B								FAM176B	0.9774
49	GLT25D1	79709	0.9773	0.0056	glycosyltransferase 25 domain containing 1								GLT25D1	0.9773
50	CMTM3	123920	0.9736	0.0019	CKLF-like MARVEL transmembrane domain containing 3								CMTM3	0.9736
51	FLNA	2316	0.9735	0.0167	filamin A, alpha								FLNA	0.9735
52	WAS	7454	0.9724	0.0211	Wiskott-Aldrich syndrome								WAS	0.9724
53	ARAF	369	0.971	0.0032	v-raf murine sarcoma 3611 viral oncogene homolog								ARAF	0.971
54	ITGB7	3695	0.9706	0.0024	integrin, beta 7								ITGB7	0.9706
55	PRIC285	85441	0.97	0.0069	peroxisomal proliferator-activated receptor A interacting complex 285								PRIC285	0.97
56	STXBP2	6813	0.967	0.0047	syntaxin binding protein 2								STXBP2	0.967
57	NRM	11270	0.9651	0.0043	nurim (nuclear envelope membrane protein)								NRM	0.9651
58	CDK2AP2	10263	0.9628	0.0032	cyclin-dependent kinase 2 associated protein 2								CDK2AP2	0.9628
59	ELF4	2000	0.962	0.0035	E74-like factor 4 (ets domain transcription factor)								ELF4	0.962
60	ST6GALNAC4	27090	0.9596	0.0008	ST6 (alpha-N-acetyl-neuraminyl-2,3-beta-galactosyl-1,3)-N-acetylgalactosaminide alpha-2,6-sialyltransferase 4								ST6GALNAC4	0.9596
61	SZRD1	26099	0.9579	0.008	SUZ RNA binding domain containing 1								SZRD1	0.9579
62	RAC2	5880	0.9556	0.0091	ras-related C3 botulinum toxin substrate 2 (rho family, small GTP binding protein Rac2)								RAC2	0.9556
63	CNN2	1265	0.9547	0.0017	calponin 2								CNN2	0.9547
64	SLC1A5	6510	0.954	0.0015	solute carrier family 1 (neutral amino acid transporter), member 5								SLC1A5	0.954
65	ABHD14B	84836	0.953	0.0062	abhydrolase domain containing 14B								ABHD14B	0.953
66	RELA	5970	0.9509	0.0103	v-rel reticuloendotheliosis viral oncogene homolog A (avian)								RELA	0.9509
67	IRF3	3661	0.9489	0.0083	interferon regulatory factor 3								IRF3	0.9489
68	HLA-G	3135	0.9433	0.0047	major histocompatibility complex, class I, G								HLA-G	0.9433
69	H2AFX	3014	0.9415	0.0104	H2A histone family, member X								H2AFX	0.9415
70	CHST14	113189	0.941	0.0012	carbohydrate (N-acetylgalactosamine 4-0) sulfotransferase 14								CHST14	0.941
71	ITGAL	3683	0.9405	0.0069	integrin, alpha L (antigen CD11A (p180), lymphocyte function-associated antigen 1; alpha polypeptide)								ITGAL	0.9405
72	MOV10	4343	0.9405	0.0027	Mov10, Moloney leukemia virus 10, homolog (mouse)								MOV10	0.9405
73	FBRS	64319	0.9394	0.0188	fibrosin								FBRS	0.9394
74	MYO9B	4650	0.9388	0.0243	myosin IXB								MYO9B	0.9388
75	TCIRG1	10312	0.9385	0.0177	T-cell, immune regulator 1, ATPase, H+ transporting, lysosomal V0 subunit A3								TCIRG1	0.9385
76	LYL1	4066	0.9383	0.007	lymphoblastic leukemia derived sequence 1								LYL1	0.9383
77	COL6A2	1292	0.937	0.0153	collagen, type VI, alpha 2								COL6A2	0.937
78	AXIN1	8312	0.9368	0.0035	axin 1								AXIN1	0.9368
79	SLC2A4RG	56731	0.9364	0.0014	SLC2A4 regulator								SLC2A4RG	0.9364
80	EML3	256364	0.9364	0.0119	echinoderm microtubule associated protein like 3								EML3	0.9364
81	AGTRAP	57085	0.9357	0.0053	angiotensin II receptor-associated protein								AGTRAP	0.9357
82	RHOG	391	0.9354	0.026	ras homolog family member G								RHOG	0.9354
83	PSD4	23550	0.9351	0.0035	pleckstrin and Sec7 domain containing 4								PSD4	0.9351
84	PFN1	5216	0.9336	0.0163	profilin 1								PFN1	0.9336
85	TGFB1I1	7041	0.9307	0.0129	transforming growth factor beta 1 induced transcript 1								TGFB1I1	0.9307
86	CCDC102A	92922	0.9305	0.0005	coiled-coil domain containing 102A								CCDC102A	0.9305
87	ABHD4	63874	0.9305	0.0061	abhydrolase domain containing 4								ABHD4	0.9305
88	LIME1	54923	0.9273	0.0065	Lck interacting transmembrane adaptor 1								LIME1	0.9273
89	PDLIM7	9260	0.926	0.0199	PDZ and LIM domain 7 (enigma)								PDLIM7	0.926
90	MAPKAPK3	7867	0.9256	0.0032	mitogen-activated protein kinase-activated protein kinase 3								MAPKAPK3	0.9256
91	TRABD	80305	0.9244	0.0071	TraB domain containing								TRABD	0.9244
92	ABCD1	215	0.9241	0.0105	ATP-binding cassette, sub-family D (ALD), member 1								ABCD1	0.9241
93	RRAS	6237	0.9228	0.0251	related RAS viral (r-ras) oncogene homolog								RRAS	0.9228
94	SIGIRR	59307	0.9207	0.0031	single immunoglobulin and toll-interleukin 1 receptor (TIR) domain								SIGIRR	0.9207
95	TBC1D10A	83874	0.9206	0.0027	TBC1 domain family, member 10A								TBC1D10A	0.9206
96	CSK	1445	0.92	0.0074	c-src tyrosine kinase								CSK	0.92
97	ERF	2077	0.9183	0.0009	Ets2 repressor factor								ERF	0.9183
98	ATP2A3	489	0.9181	0.0034	ATPase, Ca++ transporting, ubiquitous								ATP2A3	0.9181
99	MAPKAPK2	9261	0.9149	0.0068	mitogen-activated protein kinase-activated protein kinase 2								MAPKAPK2	0.9149
100	TMEM8A	58986	0.9125	0.0125	transmembrane protein 8A								TMEM8A	0.9125
101	ITPR3	3710	0.9119	0.0025	inositol 1,4,5-trisphosphate receptor, type 3								ITPR3	0.9119
102	ZDHHC18	84243	0.911	0.0022	zinc finger, DHHC-type containing 18								ZDHHC18	0.911
103	ADAM15	8751	0.9093	0.012	ADAM metallopeptidase domain 15								ADAM15	0.9093
104	SOCS1	8651	0.908	0.0008	suppressor of cytokine signaling 1								SOCS1	0.908
105	FAIM3	9214	0.9075	0.0041	Fas apoptotic inhibitory molecule 3								FAIM3	0.9075
106	ALDH16A1	126133	0.9064	0.0083	aldehyde dehydrogenase 16 family, member A1								ALDH16A1	0.9064
107	HAPLN3	145864	0.906	0.0023	hyaluronan and proteoglycan link protein 3								HAPLN3	0.906
108	BCL3	602	0.9049	0.0092	B-cell CLL/lymphoma 3								BCL3	0.9049
109	CD97	976	0.9046	0.0055	CD97 molecule								CD97	0.9046
110	ARHGEF1	9138	0.9036	0.0216	Rho guanine nucleotide exchange factor (GEF) 1								ARHGEF1	0.9036
111	SAMD1	90378	0.9029	0.0024	sterile alpha motif domain containing 1								SAMD1	0.9029
112	TAGLN2	8407	0.9007	0.0106	transgelin 2								TAGLN2	0.9007
113	TNFRSF12A	51330	0.9001	0.0163	tumor necrosis factor receptor superfamily, member 12A								TNFRSF12A	0.9001
114	IL2RG	3561	0.8996	0.0086	interleukin 2 receptor, gamma								IL2RG	0.8996
115	TAF10	6881	0.8994	0.0157	TAF10 RNA polymerase II, TATA box binding protein (TBP)-associated factor, 30kDa								TAF10	0.8994
116	EMP3	2014	0.8979	0.0201	epithelial membrane protein 3								EMP3	0.8979
117	TMC8	147138	0.8975	0.0085	transmembrane channel-like 8								TMC8	0.8975
118	LTBR	4055	0.8968	0.0103	lymphotoxin beta receptor (TNFR superfamily, member 3)								LTBR	0.8968
119	R3HDM4	91300	0.8963	0.0082	R3H domain containing 4								R3HDM4	0.8963
120	MAF1	84232	0.8948	0.0096	MAF1 homolog (S. cerevisiae)								MAF1	0.8948
121	TGFB1	7040	0.8927	0.0156	transforming growth factor, beta 1								TGFB1	0.8927
122	GALK1	2584	0.8919	0.0099	galactokinase 1								GALK1	0.8919
123	PPP1R13L	10848	0.8911	0.0061	protein phosphatase 1, regulatory subunit 13 like								PPP1R13L	0.8911
124	CISH	1154	0.8911	0.0001	cytokine inducible SH2-containing protein								CISH	0.8911
125	TRIP10	9322	0.891	0.0049	thyroid hormone receptor interactor 10								TRIP10	0.891
126	TAPBP	6892	0.8905	0.0229	TAP binding protein (tapasin)								TAPBP	0.8905
127	LMNA	4000	0.89	0.0202	lamin A/C								LMNA	0.89
128	RELB	5971	0.8894	0.0143	v-rel reticuloendotheliosis viral oncogene homolog B								RELB	0.8894
129	ITGA5	3678	0.8874	0.0242	integrin, alpha 5 (fibronectin receptor, alpha polypeptide)								ITGA5	0.8874
130	PKN3	29941	0.8869	0.0007	protein kinase N3								PKN3	0.8869
131	APRT	353	0.8867	0.0278	adenine phosphoribosyltransferase								APRT	0.8867
132	ASPG	374569	0.8854	0.0356	asparaginase homolog (S. cerevisiae)								ASPG	0.8854
133	PAK4	10298	0.8842	0.0262	p21 protein (Cdc42/Rac)-activated kinase 4								PAK4	0.8842
134	BRMS1	25855	0.8817	0.0254	breast cancer metastasis suppressor 1								BRMS1	0.8817
135	SYDE1	85360	0.8794	0.0604	synapse defective 1, Rho GTPase, homolog 1 (C. elegans)								SYDE1	0.8794
136	KHSRP	8570	0.8789	0.0131	KH-type splicing regulatory protein								KHSRP	0.8789
137	ARID3A	1820	0.8786	0.0005	AT rich interactive domain 3A (BRIGHT-like)								ARID3A	0.8786
138	VAT1	10493	0.8785	0.0102	vesicle amine transport protein 1 homolog (T. californica)								VAT1	0.8785
139	LRP10	26020	0.8779	0.0482	low density lipoprotein receptor-related protein 10								LRP10	0.8779
140	KHNYN	23351	0.8779	0.002	KH and NYN domain containing								KHNYN	0.8779
141	TK1	7083	0.8774	0.0261	thymidine kinase 1, soluble								TK1	0.8774
142	DOCK6	57572	0.8768	0.0096	dedicator of cytokinesis 6								DOCK6	0.8768
143	ACY1	95	0.8765	0.0089	aminoacylase 1								ACY1	0.8765
144	BCL2L12	83596	0.8757	0.012	BCL2-like 12 (proline rich)								BCL2L12	0.8757
145	EIF4EBP1	1978	0.874	0.0059	eukaryotic translation initiation factor 4E binding protein 1								EIF4EBP1	0.874
146	FGFRL1	53834	0.8733	0.0023	fibroblast growth factor receptor-like 1								FGFRL1	0.8733
147	TRIOBP	11078	0.8732	0.0044	TRIO and F-actin binding protein								TRIOBP	0.8732
148	RHOC	389	0.8719	0.0277	ras homolog family member C								RHOC	0.8719
149	MOB3A	126308	0.8712	0.0126	MOB kinase activator 3A								MOB3A	0.8712
150	NINJ1	4814	0.8711	0.0085	ninjurin 1								NINJ1	0.8711
151	OAF	220323	0.8702	0.0085	OAF homolog (Drosophila)								OAF	0.8702
152	TP53I13	90313	0.8699	0.0075	tumor protein p53 inducible protein 13								TP53I13	0.8699
153	ZNF598	90850	0.8688	0.0208	zinc finger protein 598								ZNF598	0.8688
154	TSEN54	283989	0.8677	0.011	tRNA splicing endonuclease 54 homolog (S. cerevisiae)								TSEN54	0.8677
155	CCL5	6352	0.8676	0.0095	chemokine (C-C motif) ligand 5								CCL5	0.8676
156	FOSL1	8061	0.8662	0.011	FOS-like antigen 1								FOSL1	0.8662
157	C9ORF142	286257	0.8653	0.0155	chromosome 9 open reading frame 142								C9ORF142	0.8653
158	MACROD1	28992	0.8647	0.0059	MACRO domain containing 1								MACROD1	0.8647
159	SH3TC1	54436	0.8637	0.0016	SH3 domain and tetratricopeptide repeats 1								SH3TC1	0.8637
160	NLRX1	79671	0.8622	0.0066	NLR family member X1								NLRX1	0.8622
161	TNIP2	79155	0.8615	0.0075	TNFAIP3 interacting protein 2								TNIP2	0.8615
162	RAD9A	5883	0.8609	0.0064	RAD9 homolog A (S. pombe)								RAD9A	0.8609
163	LYPLA2	11313	0.8609	0.004	lysophospholipase II								LYPLA2	0.8609
164	CD7	924	0.8602	0.0124	CD7 molecule								CD7	0.8602
165	SH2D2A	9047	0.8599	0.0066	SH2 domain containing 2A								SH2D2A	0.8599
166	LSR	51599	0.8596	0.0024	lipolysis stimulated lipoprotein receptor								LSR	0.8596
167	SIRT6	51548	0.8591	0.021	sirtuin 6								SIRT6	0.8591
168	ZNF787	126208	0.8584	0.0252	zinc finger protein 787								ZNF787	0.8584
169	FHL3	2275	0.8583	0.005	four and a half LIM domains 3								FHL3	0.8583
170	CLPP	8192	0.8575	0.0396	ClpP caseinolytic peptidase, ATP-dependent, proteolytic subunit homolog (E. coli)								CLPP	0.8575
171	RELT	84957	0.8563	0.015	RELT tumor necrosis factor receptor								RELT	0.8563
172	MMP14	4323	0.856	0.0401	matrix metallopeptidase 14 (membrane-inserted)								MMP14	0.856
173	UNC93B1	81622	0.8544	0.0063	unc-93 homolog B1 (C. elegans)								UNC93B1	0.8544
174	MYO1C	4641	0.8536	0.0192	myosin IC								MYO1C	0.8536
175	ZC3H12A	80149	0.8512	0.012	zinc finger CCCH-type containing 12A								ZC3H12A	0.8512
176	EHD4	30844	0.8511	0.0041	EH-domain containing 4								EHD4	0.8511
177	MMP25	64386	0.8504	0.0125	matrix metallopeptidase 25								MMP25	0.8504
178	UCP2	7351	0.8502	0.003	uncoupling protein 2 (mitochondrial, proton carrier)								UCP2	0.8502
179	DNM2	1785	0.85	0.038	dynamin 2								DNM2	0.85
180	PML	5371	0.8495	0.0332	promyelocytic leukemia								PML	0.8495
181	SCAMP2	10066	0.849	0.0157	secretory carrier membrane protein 2								SCAMP2	0.849
182	PKN1	5585	0.8488	0.0194	protein kinase N1								PKN1	0.8488
183	SNAI3	333929	0.8485	0.0009	snail homolog 3 (Drosophila)								SNAI3	0.8485
184	ICAM3	3385	0.8475	0.0063	intercellular adhesion molecule 3								ICAM3	0.8475
185	ADAT3	113179	0.8472	0.0153	adenosine deaminase, tRNA-specific 3								ADAT3	0.8472
186	CLDN15	24146	0.8458	0.0059	claudin 15								CLDN15	0.8458
187	CD37	951	0.8431	0.0179	CD37 molecule								CD37	0.8431
188	SF3A2	8175	0.843	0.0116	splicing factor 3a, subunit 2, 66kDa								SF3A2	0.843
189	PNPLA2	57104	0.8427	0.0815	patatin-like phospholipase domain containing 2								PNPLA2	0.8427
190	MAPK7	5598	0.8423	0.0036	mitogen-activated protein kinase 7								MAPK7	0.8423
191	TONSL	4796	0.8405	0.0345	tonsoku-like, DNA repair protein								TONSL	0.8405
192	PVRL2	5819	0.84	0.014	poliovirus receptor-related 2 (herpesvirus entry mediator B)								PVRL2	0.84
193	FCHSD1	89848	0.8398	0.0038	FCH and double SH3 domains 1								FCHSD1	0.8398
194	VEGFB	7423	0.8394	0.0084	vascular endothelial growth factor B								VEGFB	0.8394
195	RBCK1	10616	0.8389	0.0245	RanBP-type and C3HC4-type zinc finger containing 1								RBCK1	0.8389
196	NUDT22	84304	0.8384	0.0207	nudix (nucleoside diphosphate linked moiety X)-type motif 22								NUDT22	0.8384
197	IPO4	79711	0.838	0.0263	importin 4								IPO4	0.838
198	MIIP	60672	0.8375	0.029	migration and invasion inhibitory protein								MIIP	0.8375
199	ARRDC1	92714	0.8363	0.0197	arrestin domain containing 1								ARRDC1	0.8363
200	CMTM7	112616	0.8359	0.0008	CKLF-like MARVEL transmembrane domain containing 7								CMTM7	0.8359
201	TSPAN4	7106	0.8358	0.0161	tetraspanin 4								TSPAN4	0.8358
202	ENG	2022	0.8358	0.0249	endoglin								ENG	0.8358
203	ZNF524	147807	0.8357	0.039	zinc finger protein 524								ZNF524	0.8357
204	TRAF2	7186	0.8353	0.0194	TNF receptor-associated factor 2								TRAF2	0.8353
205	SERINC2	347735	0.8353	0.0088	serine incorporator 2								SERINC2	0.8353
206	LRCH4	4034	0.8349	0.0618	leucine-rich repeats and calponin homology (CH) domain containing 4								LRCH4	0.8349
207	ALAS2	212	0.8346	0.0024	aminolevulinate, delta-, synthase 2								ALAS2	0.8346
208	HMGA1	3159	0.8344	0.0103	high mobility group AT-hook 1								HMGA1	0.8344
209	SPNS1	83985	0.834	0.0103	spinster homolog 1 (Drosophila)								SPNS1	0.834
210	RHBDF2	79651	0.8331	0.0092	rhomboid 5 homolog 2 (Drosophila)								RHBDF2	0.8331
211	TOR4A	54863	0.8326	0.0017	torsin family 4, member A								TOR4A	0.8326
212	TCF7L1	83439	0.8316	0.0058	transcription factor 7-like 1 (T-cell specific, HMG-box)								TCF7L1	0.8316
213	PIEZO1	9780	0.8311	0.0185	piezo-type mechanosensitive ion channel component 1								PIEZO1	0.8311
214	CCDC97	90324	0.8304	0.0049	coiled-coil domain containing 97								CCDC97	0.8304
215	C22ORF13	83606	0.8304	0.0026	chromosome 22 open reading frame 13								C22ORF13	0.8304
216	HLA-J	3137	0.829	0.0173	major histocompatibility complex, class I, J (pseudogene)								HLA-J	0.829
217	AKNA	80709	0.8284	0.0097	AT-hook transcription factor								AKNA	0.8284
218	NCKAP5L	57701	0.8284	0.0203	NCK-associated protein 5-like								NCKAP5L	0.8284
219	TEAD4	7004	0.8284	0.0076	TEA domain family member 4								TEAD4	0.8284
220	GSDMD	79792	0.8274	0.0149	gasdermin D								GSDMD	0.8274
221	NME4	4833	0.827	0.0104	NME/NM23 nucleoside diphosphate kinase 4								NME4	0.827
222	RHBDF1	64285	0.8267	0.0144	rhomboid 5 homolog 1 (Drosophila)								RHBDF1	0.8267
223	SUSD3	203328	0.8265	0.0021	sushi domain containing 3								SUSD3	0.8265
224	FAM195A	84331	0.8256	0.0159	family with sequence similarity 195, member A								FAM195A	0.8256
225	SIX5	147912	0.8244	0.017	SIX homeobox 5								SIX5	0.8244
226	BCL9L	283149	0.8241	0.0072	B-cell CLL/lymphoma 9-like								BCL9L	0.8241
227	RBM42	79171	0.8232	0.0419	RNA binding motif protein 42								RBM42	0.8232
228	MVP	9961	0.8215	0.0494	major vault protein								MVP	0.8215
229	SLC16A3	9123	0.8215	0.0137	solute carrier family 16, member 3 (monocarboxylic acid transporter 4)								SLC16A3	0.8215
230	ACP5	54	0.8209	0.0022	acid phosphatase 5, tartrate resistant								ACP5	0.8209
231	CCDC22	28952	0.8206	0.0165	coiled-coil domain containing 22								CCDC22	0.8206
232	PHLDB3	653583	0.819	0.0048	pleckstrin homology-like domain, family B, member 3								PHLDB3	0.819
233	ZFPM1	161882	0.819	0.0163	zinc finger protein, multitype 1								ZFPM1	0.819
234	SH3BP1	23616	0.8188	0.0432	SH3-domain binding protein 1								SH3BP1	0.8188
235	GPR108	56927	0.8173	0.0337	G protein-coupled receptor 108								GPR108	0.8173
236	ITPRIP	85450	0.817	0.0158	inositol 1,4,5-trisphosphate receptor interacting protein								ITPRIP	0.817
237	PTRF	284119	0.8168	0.0394	polymerase I and transcript release factor								PTRF	0.8168
238	APBA3	9546	0.8163	0.0045	amyloid beta (A4) precursor protein-binding, family A, member 3								APBA3	0.8163
239	MOSPD3	64598	0.8162	0.0236	motile sperm domain containing 3								MOSPD3	0.8162
240	PLSCR3	57048	0.8157	0.0063	phospholipid scramblase 3								PLSCR3	0.8157
241	RASAL3	64926	0.8146	0.0229	RAS protein activator like 3								RASAL3	0.8146
242	STK40	83931	0.8144	0.0063	serine/threonine kinase 40								STK40	0.8144
243	PTBP1	5725	0.8138	0.0555	polypyrimidine tract binding protein 1								PTBP1	0.8138
244	ARHGAP4	393	0.8138	0.0173	Rho GTPase activating protein 4								ARHGAP4	0.8138
245	NR1H2	7376	0.8131	0.0458	nuclear receptor subfamily 1, group H, member 2								NR1H2	0.8131
246	FBXO46	23403	0.8131	0.0031	F-box protein 46								FBXO46	0.8131
247	HMHA1	23526	0.8128	0.0191	histocompatibility (minor) HA-1								HMHA1	0.8128
248	HSF1	3297	0.8127	0.0143	heat shock transcription factor 1								HSF1	0.8127
249	FERMT3	83706	0.8126	0.0164	fermitin family member 3								FERMT3	0.8126
250	SMPD2	6610	0.8125	0.0029	sphingomyelin phosphodiesterase 2, neutral membrane (neutral sphingomyelinase)								SMPD2	0.8125
251	PLAUR	5329	0.8119	0.0385	plasminogen activator, urokinase receptor								PLAUR	0.8119
252	RAB3IL1	5866	0.8107	0.0615	RAB3A interacting protein (rabin3)-like 1								RAB3IL1	0.8107
253	SLC15A3	51296	0.8106	0.0295	solute carrier family 15, member 3								SLC15A3	0.8106
254	METRNL	284207	0.8102	0.0133	meteorin, glial cell differentiation regulator-like								METRNL	0.8102
255	OGFR	11054	0.8098	0.068	opioid growth factor receptor								OGFR	0.8098
256	WASF2	10163	0.8079	0.0189	WAS protein family, member 2								WASF2	0.8079
257	EPOR	2057	0.8072	0.0188	erythropoietin receptor								EPOR	0.8072
258	MAP4K1	11184	0.8061	0.0249	mitogen-activated protein kinase kinase kinase kinase 1								MAP4K1	0.8061
259	RFXANK	8625	0.8058	0.0306	regulatory factor X-associated ankyrin-containing protein								RFXANK	0.8058
260	GRN	2896	0.8056	0.0665	granulin								GRN	0.8056
261	MAP3K11	4296	0.8054	0.0489	mitogen-activated protein kinase kinase kinase 11								MAP3K11	0.8054
262	SLC52A2	79581	0.8051	0.0429	solute carrier family 52, riboflavin transporter, member 2								SLC52A2	0.8051
263	GNB2	2783	0.8048	0.0619	guanine nucleotide binding protein (G protein), beta polypeptide 2								GNB2	0.8048
264	ZMAT5	55954	0.8035	0.0117	zinc finger, matrin-type 5								ZMAT5	0.8035
265	HSD3B7	80270	0.8025	0.0061	hydroxy-delta-5-steroid dehydrogenase, 3 beta- and steroid delta-isomerase 7								HSD3B7	0.8025
266	PYCARD	29108	0.8012	0.0183	PYD and CARD domain containing								PYCARD	0.8012
267	TMEM102	284114	0.8009	0.0026	transmembrane protein 102								TMEM102	0.8009
268	ZFP36L2	678	0.8009	0.0054	zinc finger protein 36, C3H type-like 2								ZFP36L2	0.8009
269	TYMP	1890	0.8006	0.0379	thymidine phosphorylase								TYMP	0.8006
270	PVRIG	79037	0.8005	0.0101	poliovirus receptor related immunoglobulin domain containing								PVRIG	0.8005
271	ISG20	3669	0.8004	0.014	interferon stimulated exonuclease gene 20kDa								ISG20	0.8004
272	CLIC1	1192	0.8	0.0402	chloride intracellular channel 1								CLIC1	0.8
273	IKZF1	10320	0.7999	0.0208	IKAROS family zinc finger 1 (Ikaros)								IKZF1	0.7999
274	MAD2L2	10459	0.7996	0.023	MAD2 mitotic arrest deficient-like 2 (yeast)								MAD2L2	0.7996
275	TGIF2	60436	0.7993	0.0046	TGFB-induced factor homeobox 2								TGIF2	0.7993
276	RHOD	29984	0.7991	0.0237	ras homolog family member D								RHOD	0.7991
277	FAM100B	283991	0.7988	0.007	family with sequence similarity 100, member B								FAM100B	0.7988
278	GMIP	51291	0.7984	0.0351	GEM interacting protein								GMIP	0.7984
279	TRAF7	84231	0.7983	0.017	TNF receptor-associated factor 7, E3 ubiquitin protein ligase								TRAF7	0.7983
280	TBX2	6909	0.7979	0.0305	T-box 2								TBX2	0.7979
281	STX10	8677	0.7978	0.015	syntaxin 10								STX10	0.7978
282	IKBKE	9641	0.7959	0.0088	inhibitor of kappa light polypeptide gene enhancer in B-cells, kinase epsilon								IKBKE	0.7959
283	SOLH	6650	0.7954	0.0179	small optic lobes homolog (Drosophila)								SOLH	0.7954
284	TMCO4	255104	0.7954	0.0045	transmembrane and coiled-coil domains 4								TMCO4	0.7954
285	TCN2	6948	0.7949	0.0091	transcobalamin II								TCN2	0.7949
286	PLEKHF1	79156	0.7947	0.0038	pleckstrin homology domain containing, family F (with FYVE domain) member 1								PLEKHF1	0.7947
287	SMARCD2	6603	0.7947	0.0117	SWI/SNF related, matrix associated, actin dependent regulator of chromatin, subfamily d, member 2								SMARCD2	0.7947
288	MYO1F	4542	0.7944	0.0351	myosin IF								MYO1F	0.7944
289	PLEKHO2	80301	0.794	0.0432	pleckstrin homology domain containing, family O member 2								PLEKHO2	0.794
290	NAALADL1	10004	0.7937	0.0069	N-acetylated alpha-linked acidic dipeptidase-like 1								NAALADL1	0.7937
291	UNC13D	201294	0.7932	0.0331	unc-13 homolog D (C. elegans)								UNC13D	0.7932
292	IFI35	3430	0.7929	0.0347	interferon-induced protein 35								IFI35	0.7929
293	WDR81	124997	0.7923	0.0164	WD repeat domain 81								WDR81	0.7923
294	TRADD	8717	0.7916	0.0274	TNFRSF1A-associated via death domain								TRADD	0.7916
295	TGM2	7052	0.7915	0.0141	transglutaminase 2 (C polypeptide, protein-glutamine-gamma-glutamyltransferase)								TGM2	0.7915
296	HLA-E	3133	0.7906	0.0624	major histocompatibility complex, class I, E								HLA-E	0.7906
297	FLT3LG	2323	0.7903	0.0129	fms-related tyrosine kinase 3 ligand								FLT3LG	0.7903
298	DPP9	91039	0.7899	0.035	dipeptidyl-peptidase 9								DPP9	0.7899
299	TMEM134	80194	0.7899	0.022	transmembrane protein 134								TMEM134	0.7899
300	PLEKHA4	57664	0.7897	0.0156	pleckstrin homology domain containing, family A (phosphoinositide binding specific) member 4								PLEKHA4	0.7897
301	ZAP70	7535	0.7896	0.0198	zeta-chain (TCR) associated protein kinase 70kDa								ZAP70	0.7896
302	ATHL1	80162	0.789	0.0155	ATH1, acid trehalase-like 1 (yeast)								ATHL1	0.789
303	IL27RA	9466	0.7888	0.007	interleukin 27 receptor, alpha								IL27RA	0.7888
304	NAGLU	4669	0.7877	0.0276	N-acetylglucosaminidase, alpha								NAGLU	0.7877
305	ETV4	2118	0.7875	0.0151	ets variant 4								ETV4	0.7875
306	PTPN7	5778	0.7875	0.0133	protein tyrosine phosphatase, non-receptor type 7								PTPN7	0.7875
307	RFX1	5989	0.7874	0.012	regulatory factor X, 1 (influences HLA class II expression)								RFX1	0.7874
308	SLC9A3R1	9368	0.7873	0.0037	solute carrier family 9, subfamily A (NHE3, cation proton antiporter 3), member 3 regulator 1								SLC9A3R1	0.7873
309	TSC22D4	81628	0.7868	0.0408	TSC22 domain family, member 4								TSC22D4	0.7868
310	ZNF395	55893	0.7864	0.0104	zinc finger protein 395								ZNF395	0.7864
311	PHF19	26147	0.7863	0.0239	PHD finger protein 19								PHF19	0.7863
312	MYO1G	64005	0.786	0.016	myosin IG								MYO1G	0.786
313	INPPL1	3636	0.7859	0.0297	inositol polyphosphate phosphatase-like 1								INPPL1	0.7859
314	DENND1C	79958	0.7851	0.0271	DENN/MADD domain containing 1C								DENND1C	0.7851
315	SF3B4	10262	0.7851	0.015	splicing factor 3b, subunit 4, 49kDa								SF3B4	0.7851
316	C19ORF25	148223	0.7849	0.0189	chromosome 19 open reading frame 25								C19ORF25	0.7849
317	SEPN1	57190	0.7844	0.0285	selenoprotein N, 1								SEPN1	0.7844
318	HDAC7	51564	0.7842	0.0316	histone deacetylase 7								HDAC7	0.7842
319	IMPA2	3613	0.7841	0.0055	inositol(myo)-1(or 4)-monophosphatase 2								IMPA2	0.7841
320	NBEAL2	23218	0.7838	0.021	neurobeachin-like 2								NBEAL2	0.7838
321	CENPB	1059	0.7837	0.0125	centromere protein B, 80kDa								CENPB	0.7837
322	FGD3	89846	0.7827	0.0146	FYVE, RhoGEF and PH domain containing 3								FGD3	0.7827
323	EHD2	30846	0.7826	0.0766	EH-domain containing 2								EHD2	0.7826
324	SLC24A6	80024	0.7825	0.0226	solute carrier family 24 (sodium/lithium/calcium exchanger), member 6								SLC24A6	0.7825
325	RPL10L	140801	0.7821	0.0016	ribosomal protein L10-like								RPL10L	0.7821
326	SHARPIN	81858	0.7821	0.0409	SHANK-associated RH domain interactor								SHARPIN	0.7821
327	GAMT	2593	0.7815	0.0343	guanidinoacetate N-methyltransferase								GAMT	0.7815
328	EHD1	10938	0.7815	0.0269	EH-domain containing 1								EHD1	0.7815
329	TNFRSF1A	7132	0.7809	0.033	tumor necrosis factor receptor superfamily, member 1A								TNFRSF1A	0.7809
330	KRI1	65095	0.7789	0.0357	KRI1 homolog (S. cerevisiae)								KRI1	0.7789
331	FBXL6	26233	0.7785	0.0336	F-box and leucine-rich repeat protein 6								FBXL6	0.7785
332	LOXL1	4016	0.7783	0.0145	lysyl oxidase-like 1								LOXL1	0.7783
333	DDAH2	23564	0.7778	0.0137	dimethylarginine dimethylaminohydrolase 2								DDAH2	0.7778
334	PGPEP1	54858	0.7775	0.0135	pyroglutamyl-peptidase I								PGPEP1	0.7775
335	TRIM21	6737	0.7772	0.0182	tripartite motif containing 21								TRIM21	0.7772
336	BRAT1	221927	0.7771	0.0181	BRCA1-associated ATM activator 1								BRAT1	0.7771
337	LSP1	4046	0.7764	0.0259	lymphocyte-specific protein 1								LSP1	0.7764
338	DEF6	50619	0.7761	0.0173	differentially expressed in FDCP 6 homolog (mouse)								DEF6	0.7761
339	MDFI	4188	0.7756	0.0074	MyoD family inhibitor								MDFI	0.7756
340	RUNX3	864	0.7755	0.01	runt-related transcription factor 3								RUNX3	0.7755
341	IL15RA	3601	0.7754	0.0141	interleukin 15 receptor, alpha								IL15RA	0.7754
342	2022-09-01	1731	0.7751	0.0116	septin 1								2022-09-01	0.7751
343	MICALL1	85377	0.7749	0.012	MICAL-like 1								MICALL1	0.7749
344	TLN1	7094	0.7746	0.0447	talin 1								TLN1	0.7746
345	DVL2	1856	0.7741	0.0178	dishevelled, dsh homolog 2 (Drosophila)								DVL2	0.7741
346	TCF7	6932	0.774	0.0026	transcription factor 7 (T-cell specific, HMG-box)								TCF7	0.774
347	SORBS3	10174	0.7738	0.0568	sorbin and SH3 domain containing 3								SORBS3	0.7738
348	OXT	5020	0.7728	0.0561	oxytocin, prepropeptide								OXT	0.7728
349	MED12	9968	0.7727	0.0386	mediator complex subunit 12								MED12	0.7727
350	ZNF282	8427	0.7726	0.0233	zinc finger protein 282								ZNF282	0.7726
351	MIF4GD	57409	0.7721	0.0164	MIF4G domain containing								MIF4GD	0.7721
352	ETHE1	23474	0.7717	0.0144	ethylmalonic encephalopathy 1								ETHE1	0.7717
353	SLC38A10	124565	0.7714	0.0312	solute carrier family 38, member 10								SLC38A10	0.7714
354	ARID5A	10865	0.7712	0.0223	AT rich interactive domain 5A (MRF1-like)								ARID5A	0.7712
355	COPE	11316	0.771	0.0752	coatomer protein complex, subunit epsilon								COPE	0.771
356	CST7	8530	0.7706	0.0204	cystatin F (leukocystatin)								CST7	0.7706
357	SPI1	6688	0.7706	0.0446	spleen focus forming virus (SFFV) proviral integration oncogene spi1								SPI1	0.7706
358	FAM3A	60343	0.7705	0.0644	family with sequence similarity 3, member A								FAM3A	0.7705
359	C17ORF59	54785	0.7704	0.0575	chromosome 17 open reading frame 59								C17ORF59	0.7704
360	SLC19A1	6573	0.77	0.0485	solute carrier family 19 (folate transporter), member 1								SLC19A1	0.77
361	PCIF1	63935	0.7695	0.0297	PDX1 C-terminal inhibiting factor 1								PCIF1	0.7695
362	LIMD2	80774	0.7693	0.0287	LIM domain containing 2								LIMD2	0.7693
363	SOX18	54345	0.7683	0.0032	SRY (sex determining region Y)-box 18								SOX18	0.7683
364	IRF7	3665	0.7677	0.0211	interferon regulatory factor 7								IRF7	0.7677
365	FAM110A	83541	0.7675	0.0052	family with sequence similarity 110, member A								FAM110A	0.7675
366	LRP5	4041	0.7674	0.0068	low density lipoprotein receptor-related protein 5								LRP5	0.7674
367	RRBP1	6238	0.7673	0.0273	ribosome binding protein 1 homolog 180kDa (dog)								RRBP1	0.7673
368	ZNF526	116115	0.7665	0.0069	zinc finger protein 526								ZNF526	0.7665
369	ORAI3	93129	0.7654	0.0323	ORAI calcium release-activated calcium modulator 3								ORAI3	0.7654
370	WDR34	89891	0.7651	0.038	WD repeat domain 34								WDR34	0.7651
371	FES	2242	0.7644	0.0148	feline sarcoma oncogene								FES	0.7644
372	SHMT2	6472	0.7636	0.0262	serine hydroxymethyltransferase 2 (mitochondrial)								SHMT2	0.7636
373	FIZ1	84922	0.7627	0.0303	FLT3-interacting zinc finger 1								FIZ1	0.7627
374	UBTD1	80019	0.7625	0.0478	ubiquitin domain containing 1								UBTD1	0.7625
375	PSKH1	5681	0.7625	0.0099	protein serine kinase H1								PSKH1	0.7625
376	MXD3	83463	0.7615	0.0261	MAX dimerization protein 3								MXD3	0.7615
377	CD320	51293	0.7611	0.0455	CD320 molecule								CD320	0.7611
378	TMEM219	124446	0.7607	0.0531	transmembrane protein 219								TMEM219	0.7607
379	PLEKHH3	79990	0.7605	0.0112	pleckstrin homology domain containing, family H (with MyTH4 domain) member 3								PLEKHH3	0.7605
380	YBX1	4904	0.7604	0.0125	Y box binding protein 1								YBX1	0.7604
381	MKNK2	2872	0.7601	0.0119	MAP kinase interacting serine/threonine kinase 2								MKNK2	0.7601
382	TAZ	6901	0.76	0.0639	tafazzin								TAZ	0.76
383	RPS6KA1	6195	0.7596	0.0205	ribosomal protein S6 kinase, 90kDa, polypeptide 1								RPS6KA1	0.7596
384	ALG3	10195	0.7596	0.0406	asparagine-linked glycosylation 3, alpha-1,3- mannosyltransferase homolog (S. cerevisiae)								ALG3	0.7596
385	TNFRSF1B	7133	0.7595	0.031	tumor necrosis factor receptor superfamily, member 1B								TNFRSF1B	0.7595
386	TBC1D16	125058	0.7594	0.0046	TBC1 domain family, member 16								TBC1D16	0.7594
387	CD3E	916	0.759	0.0305	CD3e molecule, epsilon (CD3-TCR complex)								CD3E	0.759
388	DOT1L	84444	0.7589	0.0231	DOT1-like, histone H3 methyltransferase (S. cerevisiae)								DOT1L	0.7589
389	PTPRCAP	5790	0.7589	0.0326	protein tyrosine phosphatase, receptor type, C-associated protein								PTPRCAP	0.7589
390	BCAM	4059	0.7589	0.0783	basal cell adhesion molecule (Lutheran blood group)								BCAM	0.7589
391	NDOR1	27158	0.7584	0.1153	NADPH dependent diflavin oxidoreductase 1								NDOR1	0.7584
392	CTDP1	9150	0.7579	0.0186	CTD (carboxy-terminal domain, RNA polymerase II, polypeptide A) phosphatase, subunit 1								CTDP1	0.7579
393	LCK	3932	0.7571	0.0204	lymphocyte-specific protein tyrosine kinase								LCK	0.7571
394	MAP2K2	5605	0.7569	0.0688	mitogen-activated protein kinase kinase 2								MAP2K2	0.7569
395	E2F4	1874	0.7564	0.071	E2F transcription factor 4, p107/p130-binding								E2F4	0.7564
396	PIM1	5292	0.7559	0.0035	pim-1 oncogene								PIM1	0.7559
397	PDLIM4	8572	0.7552	0.0127	PDZ and LIM domain 4								PDLIM4	0.7552
398	STAT5A	6776	0.7549	0.0117	signal transducer and activator of transcription 5A								STAT5A	0.7549
399	IL4R	3566	0.7549	0.0247	interleukin 4 receptor								IL4R	0.7549
400	MAP2K3	5606	0.7547	0.02	mitogen-activated protein kinase kinase 3								MAP2K3	0.7547
401	CLCF1	23529	0.7546	0.0319	cardiotrophin-like cytokine factor 1								CLCF1	0.7546
402	SOX13	9580	0.7538	0.0092	SRY (sex determining region Y)-box 13								SOX13	0.7538
403	MPG	4350	0.7538	0.0345	N-methylpurine-DNA glycosylase								MPG	0.7538
404	ISYNA1	51477	0.7537	0.0101	inositol-3-phosphate synthase 1								ISYNA1	0.7537
405	FAH	2184	0.7536	0.0138	fumarylacetoacetate hydrolase (fumarylacetoacetase)								FAH	0.7536
406	GNAI2	2771	0.7535	0.072	guanine nucleotide binding protein (G protein), alpha inhibiting activity polypeptide 2								GNAI2	0.7535
407	TRIP6	7205	0.753	0.0082	thyroid hormone receptor interactor 6								TRIP6	0.753
408	ZNF579	163033	0.753	0.0422	zinc finger protein 579								ZNF579	0.753
409	KCNQ1	3784	0.7527	0.0246	potassium voltage-gated channel, KQT-like subfamily, member 1								KCNQ1	0.7527
410	MCM5	4174	0.7527	0.0842	minichromosome maintenance complex component 5								MCM5	0.7527
411	MFSD12	126321	0.7527	0.0287	major facilitator superfamily domain containing 12								MFSD12	0.7527
412	PLEKHG2	64857	0.7526	0.0208	pleckstrin homology domain containing, family G (with RhoGef domain) member 2								PLEKHG2	0.7526
413	DERL3	91319	0.7523	0.0098	derlin 3								DERL3	0.7523
414	SDF2L1	23753	0.752	0.0237	stromal cell-derived factor 2-like 1								SDF2L1	0.752
415	RGS19	10287	0.7519	0.0229	regulator of G-protein signaling 19								RGS19	0.7519
416	RNF126P1	376412	0.7518	0.044	ring finger protein 126 pseudogene 1								RNF126P1	0.7518
417	NADK	65220	0.7517	0.0191	NAD kinase								NADK	0.7517
418	ALDH3B1	221	0.7516	0.0365	aldehyde dehydrogenase 3 family, member B1								ALDH3B1	0.7516
419	PSTPIP1	9051	0.7514	0.0266	proline-serine-threonine phosphatase interacting protein 1								PSTPIP1	0.7514
420	EIF3G	8666	0.7499	0.0576	eukaryotic translation initiation factor 3, subunit G								EIF3G	0.7499
421	ANO9	338440	0.7499	0.0198	anoctamin 9								ANO9	0.7499
422	THAP8	199745	0.7496	0.0081	THAP domain containing 8								THAP8	0.7496
423	KCNK6	9424	0.7494	0.0042	potassium channel, subfamily K, member 6								KCNK6	0.7494
424	BAX	581	0.7489	0.0074	BCL2-associated X protein								BAX	0.7489
425	E2F2	1870	0.7481	0.042	E2F transcription factor 2								E2F2	0.7481
426	IGFBP4	3487	0.748	0.0209	insulin-like growth factor binding protein 4								IGFBP4	0.748
427	LPAR2	9170	0.7477	0.0172	lysophosphatidic acid receptor 2								LPAR2	0.7477
428	HSPG2	3339	0.7475	0.0512	heparan sulfate proteoglycan 2								HSPG2	0.7475
429	CNOT3	4849	0.7472	0.045	CCR4-NOT transcription complex, subunit 3								CNOT3	0.7472
430	MYL4	4635	0.7471	0.0029	myosin, light chain 4, alkali; atrial, embryonic								MYL4	0.7471
431	MYH9	4627	0.7468	0.0636	myosin, heavy chain 9, non-muscle								MYH9	0.7468
432	C1ORF86	199990	0.7467	0.0226	chromosome 1 open reading frame 86								C1ORF86	0.7467
433	DNAJC4	3338	0.7464	0.0495	DnaJ (Hsp40) homolog, subfamily C, member 4								DNAJC4	0.7464
434	RUNX1	861	0.7464	0.0267	runt-related transcription factor 1								RUNX1	0.7464
435	MBD3	53615	0.7458	0.0818	methyl-CpG binding domain protein 3								MBD3	0.7458
436	APOBEC3C	27350	0.7451	0.0087	apolipoprotein B mRNA editing enzyme, catalytic polypeptide-like 3C								APOBEC3C	0.7451
437	PPP1R35	221908	0.7448	0.0122	protein phosphatase 1, regulatory subunit 35								PPP1R35	0.7448
438	NES	10763	0.7448	0.014	nestin								NES	0.7448
439	PLAU	5328	0.7444	0.0227	plasminogen activator, urokinase								PLAU	0.7444
440	SIT1	27240	0.7444	0.0349	signaling threshold regulating transmembrane adaptor 1								SIT1	0.7444
441	FZD2	2535	0.7436	0.0091	frizzled family receptor 2								FZD2	0.7436
442	POLM	27434	0.7435	0.0107	polymerase (DNA directed), mu								POLM	0.7435
443	TRAM2	9697	0.7431	0.0145	translocation associated membrane protein 2								TRAM2	0.7431
444	ZBTB7B	51043	0.7431	0.101	zinc finger and BTB domain containing 7B								ZBTB7B	0.7431
445	S1PR4	8698	0.7427	0.0472	sphingosine-1-phosphate receptor 4								S1PR4	0.7427
446	CRIP1	1396	0.7419	0.006	cysteine-rich protein 1 (intestinal)								CRIP1	0.7419
447	SLC43A3	29015	0.74	0.0119	solute carrier family 43, member 3								SLC43A3	0.74
448	PYCR1	5831	0.7399	0.0303	pyrroline-5-carboxylate reductase 1								PYCR1	0.7399
449	ZNF580	51157	0.7398	0.0348	zinc finger protein 580								ZNF580	0.7398
450	CAPG	822	0.7395	0.0322	capping protein (actin filament), gelsolin-like								CAPG	0.7395
451	IRF1	3659	0.7387	0.0394	interferon regulatory factor 1								IRF1	0.7387
452	TMC6	11322	0.7386	0.0197	transmembrane channel-like 6								TMC6	0.7386
453	UTS2R	2837	0.7384	0.0461	urotensin 2 receptor								UTS2R	0.7384
454	CDT1	81620	0.7379	0.0583	chromatin licensing and DNA replication factor 1								CDT1	0.7379
455	FOXC2	2303	0.7376	0.0608	forkhead box C2 (MFH-1, mesenchyme forkhead 1)								FOXC2	0.7376
456	C1ORF228	339541	0.7375	0.0026	chromosome 1 open reading frame 228								C1ORF228	0.7375
457	STK10	6793	0.7373	0.0413	serine/threonine kinase 10								STK10	0.7373
458	IGFLR1	79713	0.7369	0.0152	IGF-like family receptor 1								IGFLR1	0.7369
459	IRAK1	3654	0.7368	0.029	interleukin-1 receptor-associated kinase 1								IRAK1	0.7368
460	SH2D3A	10045	0.7366	0.0068	SH2 domain containing 3A								SH2D3A	0.7366
461	HYAL1	3373	0.7365	0.0083	hyaluronoglucosaminidase 1								HYAL1	0.7365
462	GRAMD1A	57655	0.7364	0.0212	GRAM domain containing 1A								GRAMD1A	0.7364
463	HS1BP3	64342	0.7362	0.0288	HCLS1 binding protein 3								HS1BP3	0.7362
464	ASF1B	55723	0.7362	0.0579	ASF1 anti-silencing function 1 homolog B (S. cerevisiae)								ASF1B	0.7362
465	ABCC3	8714	0.736	0.0124	ATP-binding cassette, sub-family C (CFTR/MRP), member 3								ABCC3	0.736
466	CDK4	1019	0.7356	0.0867	cyclin-dependent kinase 4								CDK4	0.7356
467	NFKBIB	4793	0.7352	0.0377	nuclear factor of kappa light polypeptide gene enhancer in B-cells inhibitor, beta								NFKBIB	0.7352
468	GATSL3	652968	0.7351	0.008	GATS protein-like 3								GATSL3	0.7351
469	CARD10	29775	0.7348	0.007	caspase recruitment domain family, member 10								CARD10	0.7348
470	DAXX	1616	0.7348	0.0202	death-domain associated protein								DAXX	0.7348
471	MSRB1	51734	0.7347	0.0199	methionine sulfoxide reductase B1								MSRB1	0.7347
472	MMP9	4318	0.7345	0.0106	matrix metallopeptidase 9 (gelatinase B, 92kDa gelatinase, 92kDa type IV collagenase)								MMP9	0.7345
473	YIF1B	90522	0.7344	0.0595	Yip1 interacting factor homolog B (S. cerevisiae)								YIF1B	0.7344
474	SLC25A39	51629	0.7341	0.0588	solute carrier family 25, member 39								SLC25A39	0.7341
475	INO80E	283899	0.7338	0.0465	INO80 complex subunit E								INO80E	0.7338
476	C1QL1	10882	0.7335	0.0317	complement component 1, q subcomponent-like 1								C1QL1	0.7335
477	A4GALT	53947	0.7334	0.0576	alpha 1,4-galactosyltransferase								A4GALT	0.7334
478	JUP	3728	0.733	0.0188	junction plakoglobin								JUP	0.733
479	ABHD15	116236	0.7328	0.0051	abhydrolase domain containing 15								ABHD15	0.7328
480	TPRA1	131601	0.7326	0.0251	transmembrane protein, adipocyte asscociated 1								TPRA1	0.7326
481	PCOLCE	5118	0.732	0.0359	procollagen C-endopeptidase enhancer								PCOLCE	0.732
482	CENPM	79019	0.7319	0.054	centromere protein M								CENPM	0.7319
483	SCARF2	91179	0.7317	0.0541	scavenger receptor class F, member 2								SCARF2	0.7317
484	RAB20	55647	0.7316	0.009	RAB20, member RAS oncogene family								RAB20	0.7316
485	ARHGAP30	257106	0.7312	0.0394	Rho GTPase activating protein 30								ARHGAP30	0.7312
486	KLHL6	89857	0.731	0.015	kelch-like 6 (Drosophila)								KLHL6	0.731
487	DNPEP	23549	0.7295	0.0294	aspartyl aminopeptidase								DNPEP	0.7295
488	BAK1	578	0.7292	0.0147	BCL2-antagonist/killer 1								BAK1	0.7292
489	GHDC	84514	0.7288	0.032	GH3 domain containing								GHDC	0.7288
490	PRICKLE3	4007	0.7288	0.0227	prickle homolog 3 (Drosophila)								PRICKLE3	0.7288
491	MIDN	90007	0.7284	0.0131	midnolin								MIDN	0.7284
492	UBA7	7318	0.7284	0.0618	ubiquitin-like modifier activating enzyme 7								UBA7	0.7284
493	CDC42EP5	148170	0.7284	0.0132	CDC42 effector protein (Rho GTPase binding) 5								CDC42EP5	0.7284
494	THOC6	79228	0.728	0.0369	THO complex 6 homolog (Drosophila)								THOC6	0.728
495	IL17RC	84818	0.7275	0.0494	interleukin 17 receptor C								IL17RC	0.7275
496	OSCAR	126014	0.727	0.0119	osteoclast associated, immunoglobulin-like receptor								OSCAR	0.727
497	RARG	5916	0.7268	0.1023	retinoic acid receptor, gamma								RARG	0.7268
498	CD3D	915	0.7268	0.0171	CD3d molecule, delta (CD3-TCR complex)								CD3D	0.7268
499	TEAD2	8463	0.7267	0.0162	TEA domain family member 2								TEAD2	0.7267
500	LBX2-AS1	151534	0.7263	0.032	LBX2 antisense RNA 1 (non-protein coding)								LBX2-AS1	0.7263
501	EPHB4	2050	0.7259	0.0342	EPH receptor B4								EPHB4	0.7259
502	TPM4	7171	0.7257	0.0256	tropomyosin 4								TPM4	0.7257
503	ZDHHC24	254359	0.7256	0.0722	zinc finger, DHHC-type containing 24								ZDHHC24	0.7256
504	CD5	921	0.7249	0.0628	CD5 molecule								CD5	0.7249
505	BMF	90427	0.7248	0.0108	Bcl2 modifying factor								BMF	0.7248
506	TNFRSF4	7293	0.7247	0.0199	tumor necrosis factor receptor superfamily, member 4								TNFRSF4	0.7247
507	CAD	790	0.7247	0.0767	carbamoyl-phosphate synthetase 2, aspartate transcarbamylase, and dihydroorotase								CAD	0.7247
508	AQP3	360	0.7246	0.0027	aquaporin 3 (Gill blood group)								AQP3	0.7246
509	FUOM	282969	0.7246	0.0071	fucose mutarotase								FUOM	0.7246
510	RBPMS2	348093	0.7246	0.0023	RNA binding protein with multiple splicing 2								RBPMS2	0.7246
511	TMEM179B	374395	0.724	0.0447	transmembrane protein 179B								TMEM179B	0.724
512	TRMT2A	27037	0.7238	0.0618	tRNA methyltransferase 2 homolog A (S. cerevisiae)								TRMT2A	0.7238
513	SCARB1	949	0.7232	0.0155	scavenger receptor class B, member 1								SCARB1	0.7232
514	MEGF6	1953	0.7232	0.0239	multiple EGF-like-domains 6								MEGF6	0.7232
515	CACTIN	58509	0.723	0.0646	cactin, spliceosome C complex subunit								CACTIN	0.723
516	TRPM4	54795	0.7227	0.015	transient receptor potential cation channel, subfamily M, member 4								TRPM4	0.7227
517	FAM109A	144717	0.7227	0.0479	family with sequence similarity 109, member A								FAM109A	0.7227
518	FER1L4	80307	0.7219	0.0424	fer-1-like 4 (C. elegans) pseudogene								FER1L4	0.7219
519	SERPINH1	871	0.7217	0.0306	serpin peptidase inhibitor, clade H (heat shock protein 47), member 1, (collagen binding protein 1)								SERPINH1	0.7217
520	CFD	1675	0.721	0.0135	complement factor D (adipsin)								CFD	0.721
521	ANPEP	290	0.7198	0.008	alanyl (membrane) aminopeptidase								ANPEP	0.7198
522	C8ORF82	414919	0.7197	0.0292	chromosome 8 open reading frame 82								C8ORF82	0.7197
523	KXD1	79036	0.7191	0.0362	KxDL motif containing 1								KXD1	0.7191
524	PSMB8	5696	0.719	0.0512	proteasome (prosome, macropain) subunit, beta type, 8 (large multifunctional peptidase 7)								PSMB8	0.719
525	CRTC2	200186	0.7189	0.0397	CREB regulated transcription coactivator 2								CRTC2	0.7189
526	PCK2	5106	0.7186	0.0102	phosphoenolpyruvate carboxykinase 2 (mitochondrial)								PCK2	0.7186
527	ITFG3	83986	0.7185	0.0501	integrin alpha FG-GAP repeat containing 3								ITFG3	0.7185
528	GATAD2A	54815	0.7184	0.0257	GATA zinc finger domain containing 2A								GATAD2A	0.7184
529	PITX1	5307	0.7184	0.0051	paired-like homeodomain 1								PITX1	0.7184
530	ZFAND3	60685	0.7181	0.0351	zinc finger, AN1-type domain 3								ZFAND3	0.7181
531	PTPN6	5777	0.7181	0.0379	protein tyrosine phosphatase, non-receptor type 6								PTPN6	0.7181
532	USF2	7392	0.718	0.0825	upstream transcription factor 2, c-fos interacting								USF2	0.718
533	HDGF	3068	0.718	0.0322	hepatoma-derived growth factor								HDGF	0.718
534	IL4I1	259307	0.718	0.0285	interleukin 4 induced 1								IL4I1	0.718
535	BMP1	649	0.7175	0.0969	bone morphogenetic protein 1								BMP1	0.7175
536	TRMT61A	115708	0.7168	0.1221	tRNA methyltransferase 61 homolog A (S. cerevisiae)								TRMT61A	0.7168
537	CYBASC3	220002	0.7167	0.0323	cytochrome b, ascorbate dependent 3								CYBASC3	0.7167
538	SLC35A4	113829	0.7164	0.0561	solute carrier family 35, member A4								SLC35A4	0.7164
539	NKIRAS2	28511	0.7163	0.0268	NFKB inhibitor interacting Ras-like 2								NKIRAS2	0.7163
540	MMP15	4324	0.716	0.0441	matrix metallopeptidase 15 (membrane-inserted)								MMP15	0.716
541	IFI30	10437	0.7156	0.0473	interferon, gamma-inducible protein 30								IFI30	0.7156
542	ZNF628	89887	0.7156	0.0253	zinc finger protein 628								ZNF628	0.7156
543	COL4A2	1284	0.7152	0.0408	collagen, type IV, alpha 2								COL4A2	0.7152
544	KLF1	10661	0.7151	0.0132	Kruppel-like factor 1 (erythroid)								KLF1	0.7151
545	PARVG	64098	0.715	0.0348	parvin, gamma								PARVG	0.715
546	IL10RA	3587	0.7148	0.0444	interleukin 10 receptor, alpha								IL10RA	0.7148
547	SLC35B2	347734	0.7147	0.0275	solute carrier family 35, member B2								SLC35B2	0.7147
548	FUT6	2528	0.7145	0.0831	fucosyltransferase 6 (alpha (1,3) fucosyltransferase)								FUT6	0.7145
549	SNRPA	6626	0.714	0.1054	small nuclear ribonucleoprotein polypeptide A								SNRPA	0.714
550	AKT1S1	84335	0.7138	0.0257	AKT1 substrate 1 (proline-rich)								AKT1S1	0.7138
551	BCAT2	587	0.7138	0.0276	branched chain amino-acid transaminase 2, mitochondrial								BCAT2	0.7138
552	EPHA1	2041	0.7138	0.0154	EPH receptor A1								EPHA1	0.7138
553	FOSL2	2355	0.7137	0.0479	FOS-like antigen 2								FOSL2	0.7137
554	GJD3	125111	0.7136	0.0871	gap junction protein, delta 3, 31.9kDa								GJD3	0.7136
555	MYBL2	4605	0.7135	0.0714	v-myb myeloblastosis viral oncogene homolog (avian)-like 2								MYBL2	0.7135
556	GAA	2548	0.713	0.0532	glucosidase, alpha; acid								GAA	0.713
557	ABI3	51225	0.7128	0.0495	ABI family, member 3								ABI3	0.7128
558	TNKS1BP1	85456	0.7123	0.0228	tankyrase 1 binding protein 1, 182kDa								TNKS1BP1	0.7123
559	EMILIN1	11117	0.7123	0.0416	elastin microfibril interfacer 1								EMILIN1	0.7123
560	PCED1B	91523	0.7117	0.0064	PC-esterase domain containing 1B								PCED1B	0.7117
561	LTC4S	4056	0.7115	0.0151	leukotriene C4 synthase								LTC4S	0.7115
562	SERTAD1	29950	0.7111	0.0328	SERTA domain containing 1								SERTAD1	0.7111
563	CXXC1	30827	0.711	0.0573	CXXC finger protein 1								CXXC1	0.711
564	CTSW	1521	0.7109	0.016	cathepsin W								CTSW	0.7109
565	H6PD	9563	0.7106	0.0438	hexose-6-phosphate dehydrogenase (glucose 1-dehydrogenase)								H6PD	0.7106
566	TBX21	30009	0.7105	0.0206	T-box 21								TBX21	0.7105
567	NOS3	4846	0.7102	0.0053	nitric oxide synthase 3 (endothelial cell)								NOS3	0.7102
568	SHC1	6464	0.71	0.0427	SHC (Src homology 2 domain containing) transforming protein 1								SHC1	0.71
569	RASSF1	11186	0.7096	0.0079	Ras association (RalGDS/AF-6) domain family member 1								RASSF1	0.7096
570	HNRNPUL1	11100	0.7094	0.0535	heterogeneous nuclear ribonucleoprotein U-like 1								HNRNPUL1	0.7094
571	HMOX1	3162	0.7094	0.0223	heme oxygenase (decycling) 1								HMOX1	0.7094
572	ZNF837	116412	0.7088	0.023	zinc finger protein 837								ZNF837	0.7088
573	GDF15	9518	0.7086	0.0074	growth differentiation factor 15								GDF15	0.7086
574	EEF1D	1936	0.7073	0.034	eukaryotic translation elongation factor 1 delta (guanine nucleotide exchange protein)								EEF1D	0.7073
575	TRIM28	10155	0.7072	0.1061	tripartite motif containing 28								TRIM28	0.7072
576	MXRA8	54587	0.707	0.0648	matrix-remodelling associated 8								MXRA8	0.707
577	EHBP1L1	254102	0.7068	0.0561	EH domain binding protein 1-like 1								EHBP1L1	0.7068
578	FLJ32255	643977	0.7068	0	uncharacterized LOC643977								FLJ32255	0.7068
579	EPS8L1	54869	0.7067	0.0497	EPS8-like 1								EPS8L1	0.7067
580	SLC12A4	6560	0.7064	0.0687	solute carrier family 12 (potassium/chloride transporters), member 4								SLC12A4	0.7064
581	AGPAT2	10555	0.7064	0.073	1-acylglycerol-3-phosphate O-acyltransferase 2 (lysophosphatidic acid acyltransferase, beta)								AGPAT2	0.7064
582	GRWD1	83743	0.7059	0.0712	glutamate-rich WD repeat containing 1								GRWD1	0.7059
583	CNPY3	10695	0.7059	0.0436	canopy 3 homolog (zebrafish)								CNPY3	0.7059
584	SLC43A1	8501	0.7059	0.0043	solute carrier family 43, member 1								SLC43A1	0.7059
585	IL1RN	3557	0.7057	0.0436	interleukin 1 receptor antagonist								IL1RN	0.7057
586	FPGS	2356	0.7057	0.0329	folylpolyglutamate synthase								FPGS	0.7057
587	TBXA2R	6915	0.7056	0.069	thromboxane A2 receptor								TBXA2R	0.7056
588	USP36	57602	0.7056	0.0172	ubiquitin specific peptidase 36								USP36	0.7056
589	FLII	2314	0.7056	0.0823	flightless I homolog (Drosophila)								FLII	0.7056
590	PCNXL3	399909	0.7044	0.0352	pecanex-like 3 (Drosophila)								PCNXL3	0.7044
591	HIC1	3090	0.7042	0.0504	hypermethylated in cancer 1								HIC1	0.7042
592	S1PR2	9294	0.7032	0.0779	sphingosine-1-phosphate receptor 2								S1PR2	0.7032
593	FBP1	2203	0.7032	0.0108	fructose-1,6-bisphosphatase 1								FBP1	0.7032
594	ZNF574	64763	0.7028	0.0485	zinc finger protein 574								ZNF574	0.7028
595	CFP	5199	0.7025	0.0393	complement factor properdin								CFP	0.7025
596	SLC39A1	27173	0.7021	0.0148	solute carrier family 39 (zinc transporter), member 1								SLC39A1	0.7021
597	ASCC2	84164	0.7017	0.0451	activating signal cointegrator 1 complex subunit 2								ASCC2	0.7017
598	TCEANC2	127428	0.7017	0.0111	transcription elongation factor A (SII) N-terminal and central domain containing 2								TCEANC2	0.7017
599	CHRNB1	1140	0.7017	0.0018	cholinergic receptor, nicotinic, beta 1 (muscle)								CHRNB1	0.7017
600	CDK2	1017	0.7015	0.0385	cyclin-dependent kinase 2								CDK2	0.7015
601	PARP10	84875	0.7011	0.0571	poly (ADP-ribose) polymerase family, member 10								PARP10	0.7011
602	CTNS	1497	0.7011	0.0188	cystinosin, lysosomal cystine transporter								CTNS	0.7011
603	ELL	8178	0.701	0.049	elongation factor RNA polymerase II								ELL	0.701
604	SH2B3	10019	0.701	0.0325	SH2B adaptor protein 3								SH2B3	0.701
605	ACADS	35	0.7007	0.0555	acyl-CoA dehydrogenase, C-2 to C-3 short chain								ACADS	0.7007
606	TRIM47	91107	0.7005	0.0179	tripartite motif containing 47								TRIM47	0.7005
607	CD6	923	0.7001	0.1284	CD6 molecule								CD6	0.7001
608	HLA-A	3105	0.7	0.05	major histocompatibility complex, class I, A								HLA-A	0.7
609	PLEC	5339	0.6999	0.064	plectin								PLEC	0.6999
610	UCKL1	54963	0.6991	0.0359	uridine-cytidine kinase 1-like 1								UCKL1	0.6991
611	MUTYH	4595	0.6991	0.0217	mutY homolog (E. coli)								MUTYH	0.6991
612	AMDHD2	51005	0.6985	0.0401	amidohydrolase domain containing 2								AMDHD2	0.6985
613	OASL	8638	0.6984	0.0347	2'-5'-oligoadenylate synthetase-like								OASL	0.6984
614	TRIM14	9830	0.698	0.0123	tripartite motif containing 14								TRIM14	0.698
615	RBM47	54502	0.6975	0.0191	RNA binding motif protein 47								RBM47	0.6975
616	MDK	4192	0.6974	0.0121	midkine (neurite growth-promoting factor 2)								MDK	0.6974
617	ZNHIT2	741	0.6969	0.0405	zinc finger, HIT-type containing 2								ZNHIT2	0.6969
618	DOK2	9046	0.6969	0.0545	docking protein 2, 56kDa								DOK2	0.6969
619	MRPL38	64978	0.6967	0.0782	mitochondrial ribosomal protein L38								MRPL38	0.6967
620	ZNF688	146542	0.6967	0.0712	zinc finger protein 688								ZNF688	0.6967
621	PLP2	5355	0.6964	0.0246	proteolipid protein 2 (colonic epithelium-enriched)								PLP2	0.6964
622	APH1A	51107	0.6962	0.0163	anterior pharynx defective 1 homolog A (C. elegans)								APH1A	0.6962
623	CDCA4	55038	0.696	0.0519	cell division cycle associated 4								CDCA4	0.696
624	WRAP53	55135	0.6958	0.0682	WD repeat containing, antisense to TP53								WRAP53	0.6958
625	LTBP4	8425	0.6957	0.0624	latent transforming growth factor beta binding protein 4								LTBP4	0.6957
626	CD276	80381	0.6952	0.0366	CD276 molecule								CD276	0.6952
627	C20ORF144	128864	0.695	0.0214	chromosome 20 open reading frame 144								C20ORF144	0.695
628	RASSF7	8045	0.6948	0.0858	Ras association (RalGDS/AF-6) domain family (N-terminal) member 7								RASSF7	0.6948
629	MAZ	4150	0.6946	0.0652	MYC-associated zinc finger protein (purine-binding transcription factor)								MAZ	0.6946
630	CPXM1	56265	0.6942	0.0069	carboxypeptidase X (M14 family), member 1								CPXM1	0.6942
631	PIK3R5	23533	0.6936	0.053	phosphoinositide-3-kinase, regulatory subunit 5								PIK3R5	0.6936
632	CLDN3	1365	0.6935	0.0268	claudin 3								CLDN3	0.6935
633	AP1M2	10053	0.6935	0.0435	adaptor-related protein complex 1, mu 2 subunit								AP1M2	0.6935
634	SPN	6693	0.6933	0.0348	sialophorin								SPN	0.6933
635	LOC100128071	100128071	0.6929	0	uncharacterized LOC100128071								LOC100128071	0.6929
636	ESPN	83715	0.6929	0.0258	espin								ESPN	0.6929
637	DOK3	79930	0.6928	0.0361	docking protein 3								DOK3	0.6928
638	PLIN3	10226	0.6923	0.0509	perilipin 3								PLIN3	0.6923
639	HYAL2	8692	0.6922	0.0296	hyaluronoglucosaminidase 2								HYAL2	0.6922
640	RABEP2	79874	0.692	0.0486	rabaptin, RAB GTPase binding effector protein 2								RABEP2	0.692
641	IGFBP2	3485	0.6919	0.0059	insulin-like growth factor binding protein 2, 36kDa								IGFBP2	0.6919
642	CEACAM1	634	0.6915	0.0244	carcinoembryonic antigen-related cell adhesion molecule 1 (biliary glycoprotein)								CEACAM1	0.6915
643	ZNF296	162979	0.6915	0.0163	zinc finger protein 296								ZNF296	0.6915
644	IRF4	3662	0.6913	0.0346	interferon regulatory factor 4								IRF4	0.6913
645	TRIM56	81844	0.6911	0.017	tripartite motif containing 56								TRIM56	0.6911
646	SH2B2	10603	0.6911	0.0194	SH2B adaptor protein 2								SH2B2	0.6911
647	TMEM150A	129303	0.691	0.0185	transmembrane protein 150A								TMEM150A	0.691
648	TAX1BP3	30851	0.6902	0.0266	Tax1 (human T-cell leukemia virus type I) binding protein 3								TAX1BP3	0.6902
649	SLC39A5	283375	0.69	0.0409	solute carrier family 39 (metal ion transporter), member 5								SLC39A5	0.69
650	NOTCH3	4854	0.6899	0.0321	notch 3								NOTCH3	0.6899
651	TSKU	25987	0.6898	0.0161	tsukushi small leucine rich proteoglycan homolog (Xenopus laevis)								TSKU	0.6898
652	SLC12A7	10723	0.6896	0.0037	solute carrier family 12 (potassium/chloride transporters), member 7								SLC12A7	0.6896
653	SNAPC2	6618	0.6891	0.0737	small nuclear RNA activating complex, polypeptide 2, 45kDa								SNAPC2	0.6891
654	CITED4	163732	0.6891	0.0262	Cbp/p300-interacting transactivator, with Glu/Asp-rich carboxy-terminal domain, 4								CITED4	0.6891
655	UBIAD1	29914	0.689	0.0196	UbiA prenyltransferase domain containing 1								UBIAD1	0.689
656	IRF5	3663	0.689	0.0456	interferon regulatory factor 5								IRF5	0.689
657	RHOF	54509	0.6889	0.0166	ras homolog family member F (in filopodia)								RHOF	0.6889
658	ENO3	2027	0.6886	0.004	enolase 3 (beta, muscle)								ENO3	0.6886
659	GNG5	2787	0.6883	0.0177	guanine nucleotide binding protein (G protein), gamma 5								GNG5	0.6883
660	KAZALD1	81621	0.6876	0.0111	Kazal-type serine peptidase inhibitor domain 1								KAZALD1	0.6876
661	MRPL12	6182	0.6876	0.1202	mitochondrial ribosomal protein L12								MRPL12	0.6876
662	CD151	977	0.6874	0.0736	CD151 molecule (Raph blood group)								CD151	0.6874
663	NLRP1	22861	0.6871	0.0409	NLR family, pyrin domain containing 1								NLRP1	0.6871
664	TLR9	54106	0.6869	0.0126	toll-like receptor 9								TLR9	0.6869
665	GSTP1	2950	0.6865	0.0289	glutathione S-transferase pi 1								GSTP1	0.6865
666	ARPC1B	10095	0.6859	0.0816	actin related protein 2/3 complex, subunit 1B, 41kDa								ARPC1B	0.6859
667	WHSC2	7469	0.6856	0.0256	Wolf-Hirschhorn syndrome candidate 2								WHSC2	0.6856
668	DOK1	1796	0.6854	0.0291	docking protein 1, 62kDa (downstream of tyrosine kinase 1)								DOK1	0.6854
669	SLC17A9	63910	0.6854	0.0206	solute carrier family 17, member 9								SLC17A9	0.6854
670	MAVS	57506	0.6853	0.0218	mitochondrial antiviral signaling protein								MAVS	0.6853
671	LRRC33	375387	0.6852	0.0165	leucine rich repeat containing 33								LRRC33	0.6852
672	DCAF15	90379	0.6852	0.0753	DDB1 and CUL4 associated factor 15								DCAF15	0.6852
673	RPS6KA4	8986	0.6849	0.079	ribosomal protein S6 kinase, 90kDa, polypeptide 4								RPS6KA4	0.6849
674	FAM129B	64855	0.6849	0.063	family with sequence similarity 129, member B								FAM129B	0.6849
675	DPP3	10072	0.6848	0.0722	dipeptidyl-peptidase 3								DPP3	0.6848
676	GFI1B	8328	0.6846	0.0096	growth factor independent 1B transcription repressor								GFI1B	0.6846
677	ECE1	1889	0.6835	0.09	endothelin converting enzyme 1								ECE1	0.6835
678	SPSB1	80176	0.6833	0.028	splA/ryanodine receptor domain and SOCS box containing 1								SPSB1	0.6833
679	APOM	55937	0.6831	0.0143	apolipoprotein M								APOM	0.6831
680	NT5C	30833	0.6831	0.0447	5', 3'-nucleotidase, cytosolic								NT5C	0.6831
681	SH3BGRL3	83442	0.6823	0.0934	SH3 domain binding glutamic acid-rich protein like 3								SH3BGRL3	0.6823
682	PRR7	80758	0.6817	0.0305	proline rich 7 (synaptic)								PRR7	0.6817
683	LEPREL1	55214	0.6814	0.0089	leprecan-like 1								LEPREL1	0.6814
684	ADA	100	0.6811	0.0072	adenosine deaminase								ADA	0.6811
685	FOXD2-AS1	84793	0.6809	0.0329	FOXD2 antisense RNA 1 (non-protein coding)								FOXD2-AS1	0.6809
686	GSC	145258	0.6808	0.0056	goosecoid homeobox								GSC	0.6808
687	TIMP1	7076	0.6805	0.0725	TIMP metallopeptidase inhibitor 1								TIMP1	0.6805
688	OSBPL7	114881	0.6801	0.0587	oxysterol binding protein-like 7								OSBPL7	0.6801
689	COMT	1312	0.68	0.0528	catechol-O-methyltransferase								COMT	0.68
690	FAM159A	348378	0.6799	0.0091	family with sequence similarity 159, member A								FAM159A	0.6799
691	ZNF646	9726	0.6793	0.0547	zinc finger protein 646								ZNF646	0.6793
692	INTS5	80789	0.6793	0.0334	integrator complex subunit 5								INTS5	0.6793
693	CACNG4	27092	0.6786	0.1757	calcium channel, voltage-dependent, gamma subunit 4								CACNG4	0.6786
694	LITAF	9516	0.6784	0.029	lipopolysaccharide-induced TNF factor								LITAF	0.6784
695	PTPN23	25930	0.6777	0.0733	protein tyrosine phosphatase, non-receptor type 23								PTPN23	0.6777
696	GBGT1	26301	0.6775	0.0218	globoside alpha-1,3-N-acetylgalactosaminyltransferase 1								GBGT1	0.6775
697	SLC26A6	65010	0.6774	0.0182	solute carrier family 26, member 6								SLC26A6	0.6774
698	GRK6	2870	0.6769	0.0788	G protein-coupled receptor kinase 6								GRK6	0.6769
699	PRR22	163154	0.6764	0.0601	proline rich 22								PRR22	0.6764
700	ZNF219	51222	0.6762	0.075	zinc finger protein 219								ZNF219	0.6762
701	CIDEB	27141	0.6762	0.0114	cell death-inducing DFFA-like effector b								CIDEB	0.6762
702	CD27	939	0.676	0.0333	CD27 molecule								CD27	0.676
703	SLC37A4	2542	0.6757	0.0422	solute carrier family 37 (glucose-6-phosphate transporter), member 4								SLC37A4	0.6757
704	SMARCC1	6599	0.6754	0.0768	SWI/SNF related, matrix associated, actin dependent regulator of chromatin, subfamily c, member 1								SMARCC1	0.6754
705	KLC3	147700	0.6752	0.0282	kinesin light chain 3								KLC3	0.6752
706	LINC00528	200298	0.675	0	long intergenic non-protein coding RNA 528								LINC00528	0.675
707	PLVAP	83483	0.6746	0.0271	plasmalemma vesicle associated protein								PLVAP	0.6746
708	ERBB2	2064	0.6744	0.0356	v-erb-b2 erythroblastic leukemia viral oncogene homolog 2, neuro/glioblastoma derived oncogene homolog (avian)								ERBB2	0.6744
709	PRSS36	146547	0.6744	0.0709	protease, serine, 36								PRSS36	0.6744
710	CHST11	50515	0.6742	0.0136	carbohydrate (chondroitin 4) sulfotransferase 11								CHST11	0.6742
711	CIB1	10519	0.6738	0.0554	calcium and integrin binding 1 (calmyrin)								CIB1	0.6738
712	IL12RB1	3594	0.6737	0.037	interleukin 12 receptor, beta 1								IL12RB1	0.6737
713	SPPL2B	56928	0.6735	0.0834	signal peptide peptidase like 2B								SPPL2B	0.6735
714	SLC16A5	9121	0.6734	0.0162	solute carrier family 16, member 5 (monocarboxylic acid transporter 6)								SLC16A5	0.6734
715	CTDNEP1	23399	0.6732	0.0548	CTD nuclear envelope phosphatase 1								CTDNEP1	0.6732
716	GALM	130589	0.6723	0.0096	galactose mutarotase (aldose 1-epimerase)								GALM	0.6723
717	NXT1	29107	0.672	0.0334	NTF2-like export factor 1								NXT1	0.672
718	SCRIB	23513	0.6719	0.0288	scribbled homolog (Drosophila)								SCRIB	0.6719
719	MGAT1	4245	0.6717	0.0824	mannosyl (alpha-1,3-)-glycoprotein beta-1,2-N-acetylglucosaminyltransferase								MGAT1	0.6717
720	MLL4	9757	0.6712	0.0719	myeloid/lymphoid or mixed-lineage leukemia 4								MLL4	0.6712
721	PLOD3	8985	0.671	0.0643	procollagen-lysine, 2-oxoglutarate 5-dioxygenase 3								PLOD3	0.671
722	ZNF784	147808	0.6709	0.0125	zinc finger protein 784								ZNF784	0.6709
723	APOA1	335	0.6702	0.0512	apolipoprotein A-I								APOA1	0.6702
724	C11ORF35	256329	0.6702	0.0403	chromosome 11 open reading frame 35								C11ORF35	0.6702
725	TUBB6	84617	0.6701	0.0425	tubulin, beta 6 class V								TUBB6	0.6701
726	CD4	920	0.67	0.0545	CD4 molecule								CD4	0.67
727	CXCR3	2833	0.67	0.0646	chemokine (C-X-C motif) receptor 3								CXCR3	0.67
728	HSH2D	84941	0.6694	0.0153	hematopoietic SH2 domain containing								HSH2D	0.6694
729	FSTL3	10272	0.6686	0.0613	follistatin-like 3 (secreted glycoprotein)								FSTL3	0.6686
730	MGC45922	284365	0.6685	0.1444	uncharacterized LOC284365								MGC45922	0.6685
731	RARA	5914	0.6683	0.0931	retinoic acid receptor, alpha								RARA	0.6683
732	PRRX2	51450	0.6683	0.0749	paired related homeobox 2								PRRX2	0.6683
733	SECTM1	6398	0.6681	0.0347	secreted and transmembrane 1								SECTM1	0.6681
734	NCKAP1L	3071	0.6679	0.0493	NCK-associated protein 1-like								NCKAP1L	0.6679
735	CD79A	973	0.6674	0.0552	CD79a molecule, immunoglobulin-associated alpha								CD79A	0.6674
736	PLK1	5347	0.6672	0.0765	polo-like kinase 1								PLK1	0.6672
737	TMEM109	79073	0.6669	0.0517	transmembrane protein 109								TMEM109	0.6669
738	C17ORF70	80233	0.6665	0.0743	chromosome 17 open reading frame 70								C17ORF70	0.6665
739	C9ORF16	79095	0.6665	0.0692	chromosome 9 open reading frame 16								C9ORF16	0.6665
740	FHOD1	29109	0.6664	0.0317	formin homology 2 domain containing 1								FHOD1	0.6664
741	ICAM2	3384	0.6663	0.023	intercellular adhesion molecule 2								ICAM2	0.6663
742	COL27A1	85301	0.6662	0.0514	collagen, type XXVII, alpha 1								COL27A1	0.6662
743	TMEM51	55092	0.6659	0.0075	transmembrane protein 51								TMEM51	0.6659
744	IER5L	389792	0.6658	0.0246	immediate early response 5-like								IER5L	0.6658
745	DNAAF3	352909	0.6658	0.01	dynein, axonemal, assembly factor 3								DNAAF3	0.6658
746	PRRC2A	7916	0.6657	0.1163	proline-rich coiled-coil 2A								PRRC2A	0.6657
747	CDX1	1044	0.6656	0.1133	caudal type homeobox 1								CDX1	0.6656
748	CLIC3	9022	0.6655	0.006	chloride intracellular channel 3								CLIC3	0.6655
749	RPS6KB2	6199	0.6652	0.0793	ribosomal protein S6 kinase, 70kDa, polypeptide 2								RPS6KB2	0.6652
750	CD70	970	0.6651	0.008	CD70 molecule								CD70	0.6651
751	HLA-F	3134	0.6646	0.0698	major histocompatibility complex, class I, F								HLA-F	0.6646
752	NKG7	4818	0.6645	0.0302	natural killer cell group 7 sequence								NKG7	0.6645
753	TSSC4	10078	0.6644	0.0734	tumor suppressing subtransferable candidate 4								TSSC4	0.6644
754	ARHGEF16	27237	0.6643	0.092	Rho guanine nucleotide exchange factor (GEF) 16								ARHGEF16	0.6643
755	FGFR4	2264	0.6642	0.0457	fibroblast growth factor receptor 4								FGFR4	0.6642
756	SLC34A3	142680	0.6641	0.1244	solute carrier family 34 (sodium phosphate), member 3								SLC34A3	0.6641
757	LAMB2	3913	0.6638	0.0815	laminin, beta 2 (laminin S)								LAMB2	0.6638
758	FANCE	2178	0.6637	0.0214	Fanconi anemia, complementation group E								FANCE	0.6637
759	SLC3A2	6520	0.6636	0.0373	solute carrier family 3 (activators of dibasic and neutral amino acid transport), member 2								SLC3A2	0.6636
760	GYS1	2997	0.6636	0.0467	glycogen synthase 1 (muscle)								GYS1	0.6636
761	NFE2	4778	0.6628	0.0043	nuclear factor (erythroid-derived 2), 45kDa								NFE2	0.6628
762	ARHGDIA	396	0.6627	0.1072	Rho GDP dissociation inhibitor (GDI) alpha								ARHGDIA	0.6627
763	CCDC61	729440	0.6626	0.0417	coiled-coil domain containing 61								CCDC61	0.6626
764	CYB5R3	1727	0.6626	0.0756	cytochrome b5 reductase 3								CYB5R3	0.6626
765	ICAM1	3383	0.6625	0.0702	intercellular adhesion molecule 1								ICAM1	0.6625
766	NT5DC2	64943	0.6623	0.0651	5'-nucleotidase domain containing 2								NT5DC2	0.6623
767	HRC	3270	0.6622	0.012	histidine rich calcium binding protein								HRC	0.6622
768	MRC2	9902	0.6622	0.0755	mannose receptor, C type 2								MRC2	0.6622
769	PTRH1	138428	0.6622	0.0477	peptidyl-tRNA hydrolase 1 homolog (S. cerevisiae)								PTRH1	0.6622
770	JOSD2	126119	0.6622	0.0581	Josephin domain containing 2								JOSD2	0.6622
771	SYTL1	84958	0.6619	0.0233	synaptotagmin-like 1								SYTL1	0.6619
772	RPUSD1	113000	0.6616	0.0995	RNA pseudouridylate synthase domain containing 1								RPUSD1	0.6616
773	NFATC4	4776	0.6615	0.1423	nuclear factor of activated T-cells, cytoplasmic, calcineurin-dependent 4								NFATC4	0.6615
774	LOC153684	153684	0.6612	0.013	uncharacterized LOC153684								LOC153684	0.6612
775	CD40	958	0.6611	0.0315	CD40 molecule, TNF receptor superfamily member 5								CD40	0.6611
776	MAP3K14	9020	0.661	0.0151	mitogen-activated protein kinase kinase kinase 14								MAP3K14	0.661
777	MYCBP	26292	0.661	0.0191	c-myc binding protein								MYCBP	0.661
778	GATA2	2624	0.6607	0.0043	GATA binding protein 2								GATA2	0.6607
779	VWA1	64856	0.6607	0.0767	von Willebrand factor A domain containing 1								VWA1	0.6607
780	TP53	7157	0.6606	0.0209	tumor protein p53								TP53	0.6606
781	RPS5	6193	0.6603	0.0469	ribosomal protein S5								RPS5	0.6603
782	SEMA3F	6405	0.6596	0.041	sema domain, immunoglobulin domain (Ig), short basic domain, secreted, (semaphorin) 3F								SEMA3F	0.6596
783	INSL3	3640	0.6596	0.1258	insulin-like 3 (Leydig cell)								INSL3	0.6596
784	GZMM	3004	0.6596	0.0616	granzyme M (lymphocyte met-ase 1)								GZMM	0.6596
785	PKMYT1	9088	0.6591	0.097	protein kinase, membrane associated tyrosine/threonine 1								PKMYT1	0.6591
786	ZNF76	7629	0.6586	0.0569	zinc finger protein 76								ZNF76	0.6586
787	ZC3H3	23144	0.6586	0.0397	zinc finger CCCH-type containing 3								ZC3H3	0.6586
788	REEP4	80346	0.6584	0.0248	receptor accessory protein 4								REEP4	0.6584
789	PSME1	5720	0.6583	0.0622	proteasome (prosome, macropain) activator subunit 1 (PA28 alpha)								PSME1	0.6583
790	C8ORF58	541565	0.6581	0.0151	chromosome 8 open reading frame 58								C8ORF58	0.6581
791	ATAD3A	55210	0.658	0.1132	ATPase family, AAA domain containing 3A								ATAD3A	0.658
792	VASN	114990	0.658	0.0333	vasorin								VASN	0.658
793	LAMC3	10319	0.6579	0.0369	laminin, gamma 3								LAMC3	0.6579
794	JAK3	3718	0.6578	0.0888	Janus kinase 3								JAK3	0.6578
795	LZTS2	84445	0.6574	0.045	leucine zipper, putative tumor suppressor 2								LZTS2	0.6574
796	LATS2	26524	0.6573	0.0547	LATS, large tumor suppressor, homolog 2 (Drosophila)								LATS2	0.6573
797	PARP12	64761	0.6572	0.0435	poly (ADP-ribose) polymerase family, member 12								PARP12	0.6572
798	HYI	81888	0.657	0.0238	hydroxypyruvate isomerase (putative)								HYI	0.657
799	RPL36	25873	0.657	0.0488	ribosomal protein L36								RPL36	0.657
800	STAB1	23166	0.657	0.075	stabilin 1								STAB1	0.657
801	SELPLG	6404	0.6568	0.0816	selectin P ligand								SELPLG	0.6568
802	RFX2	5990	0.6567	0.0222	regulatory factor X, 2 (influences HLA class II expression)								RFX2	0.6567
803	TKTL1	8277	0.6564	0.0117	transketolase-like 1								TKTL1	0.6564
804	GPR35	2859	0.6563	0.0256	G protein-coupled receptor 35								GPR35	0.6563
805	ABO	28	0.6563	0.075	ABO blood group (transferase A, alpha 1-3-N-acetylgalactosaminyltransferase; transferase B, alpha 1-3-galactosyltransferase)								ABO	0.6563
806	MSN	4478	0.6554	0.0831	moesin								MSN	0.6554
807	C21ORF56	84221	0.6552	0.0115	chromosome 21 open reading frame 56								C21ORF56	0.6552
808	MRPL23	6150	0.6551	0.1021	mitochondrial ribosomal protein L23								MRPL23	0.6551
809	TSPAN32	10077	0.6549	0.0585	tetraspanin 32								TSPAN32	0.6549
810	SPINT1	6692	0.6546	0.0324	serine peptidase inhibitor, Kunitz type 1								SPINT1	0.6546
811	POU2AF1	5450	0.6546	0.013	POU class 2 associating factor 1								POU2AF1	0.6546
812	AGER	177	0.6546	0.0926	advanced glycosylation end product-specific receptor								AGER	0.6546
813	LILRA2	11027	0.6543	0.0652	leukocyte immunoglobulin-like receptor, subfamily A (with TM domain), member 2								LILRA2	0.6543
814	STARD3	10948	0.6542	0.0747	StAR-related lipid transfer (START) domain containing 3								STARD3	0.6542
815	TEAD3	7005	0.6541	0.0205	TEA domain family member 3								TEAD3	0.6541
816	PLEKHJ1	55111	0.6541	0.0886	pleckstrin homology domain containing, family J member 1								PLEKHJ1	0.6541
817	CEBPA	1050	0.6539	0.0164	CCAAT/enhancer binding protein (C/EBP), alpha								CEBPA	0.6539
818	TRIM15	89870	0.6535	0.144	tripartite motif containing 15								TRIM15	0.6535
819	NPR1	4881	0.6535	0.1049	natriuretic peptide receptor A/guanylate cyclase A (atrionatriuretic peptide receptor A)								NPR1	0.6535
820	IL32	9235	0.6532	0.0181	interleukin 32								IL32	0.6532
821	PLTP	5360	0.653	0.0197	phospholipid transfer protein								PLTP	0.653
822	ARF6	382	0.653	0.0255	ADP-ribosylation factor 6								ARF6	0.653
823	SCAMP3	10067	0.653	0.0858	secretory carrier membrane protein 3								SCAMP3	0.653
824	BCORL1	63035	0.6526	0.0422	BCL6 corepressor-like 1								BCORL1	0.6526
825	TRIB3	57761	0.6526	0.0119	tribbles homolog 3 (Drosophila)								TRIB3	0.6526
826	NOTUM	147111	0.6524	0.0452	notum pectinacetylesterase homolog (Drosophila)								NOTUM	0.6524
827	CNTROB	116840	0.6523	0.0718	centrobin, centrosomal BRCA2 interacting protein								CNTROB	0.6523
828	ZBTB32	27033	0.6518	0.0428	zinc finger and BTB domain containing 32								ZBTB32	0.6518
829	SLC12A9	56996	0.6517	0.1055	solute carrier family 12 (potassium/chloride transporters), member 9								SLC12A9	0.6517
830	SCLY	51540	0.6517	0.0095	selenocysteine lyase								SCLY	0.6517
831	KDELR1	10945	0.6516	0.0783	KDEL (Lys-Asp-Glu-Leu) endoplasmic reticulum protein retention receptor 1								KDELR1	0.6516
832	BATF	10538	0.6513	0.034	basic leucine zipper transcription factor, ATF-like								BATF	0.6513
833	C19ORF24	55009	0.6512	0.071	chromosome 19 open reading frame 24								C19ORF24	0.6512
834	ACAP1	9744	0.6511	0.0701	ArfGAP with coiled-coil, ankyrin repeat and PH domains 1								ACAP1	0.6511
835	FAM167B	84734	0.6511	0.0295	family with sequence similarity 167, member B								FAM167B	0.6511
836	XKR8	55113	0.651	0.0071	XK, Kell blood group complex subunit-related family, member 8								XKR8	0.651
837	APOL3	80833	0.6506	0.0489	apolipoprotein L, 3								APOL3	0.6506
838	LGALS9	3965	0.6505	0.0483	lectin, galactoside-binding, soluble, 9								LGALS9	0.6505
839	NOSIP	51070	0.6505	0.0652	nitric oxide synthase interacting protein								NOSIP	0.6505
840	MZB1	51237	0.6496	0.0244	marginal zone B and B1 cell-specific protein								MZB1	0.6496
841	CD248	57124	0.6495	0.0634	CD248 molecule, endosialin								CD248	0.6495
842	NXNL1	115861	0.6495	0.0749	nucleoredoxin-like 1								NXNL1	0.6495
843	PRR5	55615	0.6494	0.0175	proline rich 5 (renal)								PRR5	0.6494
844	PTH2	113091	0.6492	0.1141	parathyroid hormone 2								PTH2	0.6492
845	RCE1	9986	0.6491	0.0422	RCE1 homolog, prenyl protein protease (S. cerevisiae)								RCE1	0.6491
846	NUP210	23225	0.649	0.0492	nucleoporin 210kDa								NUP210	0.649
847	C1ORF68	100129271	0.6489	0.0977	chromosome 1 open reading frame 68								C1ORF68	0.6489
848	G6PD	2539	0.6486	0.0623	glucose-6-phosphate dehydrogenase								G6PD	0.6486
849	SPHK1	8877	0.6485	0.0567	sphingosine kinase 1								SPHK1	0.6485
850	BLK	640	0.6484	0.0148	B lymphoid tyrosine kinase								BLK	0.6484
851	TMEM173	340061	0.648	0.0462	transmembrane protein 173								TMEM173	0.648
852	ZYX	7791	0.6479	0.1108	zyxin								ZYX	0.6479
853	SARDH	1757	0.6479	0.1264	sarcosine dehydrogenase								SARDH	0.6479
854	TTC31	64427	0.6478	0.0386	tetratricopeptide repeat domain 31								TTC31	0.6478
855	PRKCSH	5589	0.6477	0.111	protein kinase C substrate 80K-H								PRKCSH	0.6477
856	C8ORF73	642475	0.6475	0.079	chromosome 8 open reading frame 73								C8ORF73	0.6475
857	PLK3	1263	0.647	0.0494	polo-like kinase 3								PLK3	0.647
858	CPSF3L	54973	0.6469	0.0853	cleavage and polyadenylation specific factor 3-like								CPSF3L	0.6469
859	IL21R	50615	0.6466	0.0299	interleukin 21 receptor								IL21R	0.6466
860	RAB34	83871	0.6462	0.0262	RAB34, member RAS oncogene family								RAB34	0.6462
861	CCDC124	115098	0.6459	0.1172	coiled-coil domain containing 124								CCDC124	0.6459
862	DTX2	113878	0.6457	0.0484	deltex homolog 2 (Drosophila)								DTX2	0.6457
863	KCNN4	3783	0.6456	0.008	potassium intermediate/small conductance calcium-activated channel, subfamily N, member 4								KCNN4	0.6456
864	PRF1	5551	0.6451	0.04	perforin 1 (pore forming protein)								PRF1	0.6451
865	GFI1	2672	0.645	0.0172	growth factor independent 1 transcription repressor								GFI1	0.645
866	ALKBH7	84266	0.6449	0.0788	alkB, alkylation repair homolog 7 (E. coli)								ALKBH7	0.6449
867	NPB	256933	0.6447	0.0667	neuropeptide B								NPB	0.6447
868	WNT6	7475	0.6445	0.0729	wingless-type MMTV integration site family, member 6								WNT6	0.6445
869	MED22	6837	0.6444	0.0712	mediator complex subunit 22								MED22	0.6444
870	PGF	5228	0.6443	0.0173	placental growth factor								PGF	0.6443
871	CCDC137	339230	0.6443	0.057	coiled-coil domain containing 137								CCDC137	0.6443
872	FZD9	8326	0.6442	0.1001	frizzled family receptor 9								FZD9	0.6442
873	TROAP	10024	0.6437	0.0882	trophinin associated protein (tastin)								TROAP	0.6437
874	MUS81	80198	0.6436	0.0373	MUS81 endonuclease homolog (S. cerevisiae)								MUS81	0.6436
875	NAPSA	9476	0.6432	0.0388	napsin A aspartic peptidase								NAPSA	0.6432
876	CRYAA	1409	0.6432	0.0637	crystallin, alpha A								CRYAA	0.6432
877	EFNA4	1945	0.6432	0.0173	ephrin-A4								EFNA4	0.6432
878	C19ORF54	284325	0.6432	0.0256	chromosome 19 open reading frame 54								C19ORF54	0.6432
879	HCST	10870	0.6428	0.0518	hematopoietic cell signal transducer								HCST	0.6428
880	RAX	30062	0.6425	0.1475	retina and anterior neural fold homeobox								RAX	0.6425
881	TRPV2	51393	0.6421	0.0501	transient receptor potential cation channel, subfamily V, member 2								TRPV2	0.6421
882	KLK1	3816	0.6421	0.0385	kallikrein 1								KLK1	0.6421
883	IER2	9592	0.6419	0.0254	immediate early response 2								IER2	0.6419
884	PPP6R1	22870	0.6412	0.0757	protein phosphatase 6, regulatory subunit 1								PPP6R1	0.6412
885	SIGLEC7	27036	0.6411	0.1487	sialic acid binding Ig-like lectin 7								SIGLEC7	0.6411
886	GYLTL1B	120071	0.6411	0.0246	glycosyltransferase-like 1B								GYLTL1B	0.6411
887	SYPL2	284612	0.6411	0.0883	synaptophysin-like 2								SYPL2	0.6411
888	NCLN	56926	0.641	0.1125	nicalin								NCLN	0.641
889	AGBL5	60509	0.6407	0.0476	ATP/GTP binding protein-like 5								AGBL5	0.6407
890	C21ORF58	54058	0.6407	0.0622	chromosome 21 open reading frame 58								C21ORF58	0.6407
891	ZNF672	79894	0.6402	0.0201	zinc finger protein 672								ZNF672	0.6402
892	FAM78A	286336	0.6401	0.0318	family with sequence similarity 78, member A								FAM78A	0.6401
893	CCHCR1	54535	0.64	0.0411	coiled-coil alpha-helical rod protein 1								CCHCR1	0.64
894	TGIF1	7050	0.6398	0.014	TGFB-induced factor homeobox 1								TGIF1	0.6398
895	ERN1	2081	0.6395	0.0653	endoplasmic reticulum to nucleus signaling 1								ERN1	0.6395
896	APEX2	27301	0.6391	0.0743	APEX nuclease (apurinic/apyrimidinic endonuclease) 2								APEX2	0.6391
897	CCR7	1236	0.6389	0.039	chemokine (C-C motif) receptor 7								CCR7	0.6389
898	BACE2	25825	0.6388	0.0083	beta-site APP-cleaving enzyme 2								BACE2	0.6388
899	BCL6B	255877	0.6388	0.0726	B-cell CLL/lymphoma 6, member B								BCL6B	0.6388
900	TMED1	11018	0.6388	0.0485	transmembrane emp24 protein transport domain containing 1								TMED1	0.6388
901	MUC3A	4584	0.6387	0.2409	mucin 3A, cell surface associated								MUC3A	0.6387
902	ARSD	414	0.6386	0.0395	arylsulfatase D								ARSD	0.6386
903	FOXN4	121643	0.6386	0.1281	forkhead box N4								FOXN4	0.6386
904	NAGS	162417	0.6386	0.004	N-acetylglutamate synthase								NAGS	0.6386
905	SOCS3	9021	0.6385	0.0588	suppressor of cytokine signaling 3								SOCS3	0.6385
906	ZNF414	84330	0.6384	0.0113	zinc finger protein 414								ZNF414	0.6384
907	GRTP1	79774	0.6381	0.0093	growth hormone regulated TBC protein 1								GRTP1	0.6381
908	MIER2	54531	0.6381	0.0953	mesoderm induction early response 1, family member 2								MIER2	0.6381
909	ADORA2A	135	0.6379	0.013	adenosine A2a receptor								ADORA2A	0.6379
910	LMNB2	84823	0.6377	0.1153	lamin B2								LMNB2	0.6377
911	ADAMTSL4	54507	0.6374	0.0164	ADAMTS-like 4								ADAMTSL4	0.6374
912	FKBP10	60681	0.6373	0.037	FK506 binding protein 10, 65 kDa								FKBP10	0.6373
913	C3ORF45	132228	0.6373	0.0271	chromosome 3 open reading frame 45								C3ORF45	0.6373
914	NAA10	8260	0.637	0.1192	N(alpha)-acetyltransferase 10, NatA catalytic subunit								NAA10	0.637
915	GPR132	29933	0.6354	0.0619	G protein-coupled receptor 132								GPR132	0.6354
916	U2AF2	11338	0.6353	0.0643	U2 small nuclear RNA auxiliary factor 2								U2AF2	0.6353
917	TMEM214	54867	0.6351	0.0782	transmembrane protein 214								TMEM214	0.6351
918	ARHGEF19	128272	0.6351	0.02	Rho guanine nucleotide exchange factor (GEF) 19								ARHGEF19	0.6351
919	FXYD2	486	0.6349	0.0316	FXYD domain containing ion transport regulator 2								FXYD2	0.6349
920	TTC7A	57217	0.6347	0.0307	tetratricopeptide repeat domain 7A								TTC7A	0.6347
921	CARHSP1	23589	0.6347	0.0223	calcium regulated heat stable protein 1, 24kDa								CARHSP1	0.6347
922	CYP1A2	1544	0.6344	0.0904	cytochrome P450, family 1, subfamily A, polypeptide 2								CYP1A2	0.6344
923	IL17RA	23765	0.6342	0.059	interleukin 17 receptor A								IL17RA	0.6342
924	FGR	2268	0.6338	0.0653	Gardner-Rasheed feline sarcoma viral (v-fgr) oncogene homolog								FGR	0.6338
925	HDAC10	83933	0.6335	0.0736	histone deacetylase 10								HDAC10	0.6335
926	HLA-C	3107	0.6332	0.0856	major histocompatibility complex, class I, C								HLA-C	0.6332
927	KDM6B	23135	0.6332	0.0876	lysine (K)-specific demethylase 6B								KDM6B	0.6332
928	PIAS4	51588	0.6331	0.0514	protein inhibitor of activated STAT, 4								PIAS4	0.6331
929	LAT2	7462	0.633	0.0407	linker for activation of T cells family, member 2								LAT2	0.633
930	ATP2A1	487	0.633	0.0054	ATPase, Ca++ transporting, cardiac muscle, fast twitch 1								ATP2A1	0.633
931	RCN3	57333	0.6328	0.0711	reticulocalbin 3, EF-hand calcium binding domain								RCN3	0.6328
932	LOC283663	283663	0.6328	0.0309	uncharacterized LOC283663								LOC283663	0.6328
933	LAT	27040	0.6325	0.0385	linker for activation of T cells								LAT	0.6325
934	ARAP1	116985	0.6325	0.109	ArfGAP with RhoGAP domain, ankyrin repeat and PH domain 1								ARAP1	0.6325
935	STRN4	29888	0.6323	0.0814	striatin, calmodulin binding protein 4								STRN4	0.6323
936	GATA1	2623	0.6321	0.1451	GATA binding protein 1 (globin transcription factor 1)								GATA1	0.6321
937	TNFAIP3	7128	0.6321	0.0665	tumor necrosis factor, alpha-induced protein 3								TNFAIP3	0.6321
938	SCAF1	58506	0.632	0.093	SR-related CTD-associated factor 1								SCAF1	0.632
939	EVX1	2128	0.6316	0.1643	even-skipped homeobox 1								EVX1	0.6316
940	TFEB	7942	0.6316	0.0807	transcription factor EB								TFEB	0.6316
941	LYPD3	27076	0.6315	0.0393	LY6/PLAUR domain containing 3								LYPD3	0.6315
942	CCDC94	55702	0.6314	0.0711	coiled-coil domain containing 94								CCDC94	0.6314
943	SLC27A1	376497	0.631	0.0732	solute carrier family 27 (fatty acid transporter), member 1								SLC27A1	0.631
944	SRCAP	10847	0.6309	0.1109	Snf2-related CREBBP activator protein								SRCAP	0.6309
945	CABP4	57010	0.6308	0.1521	calcium binding protein 4								CABP4	0.6308
946	ZBTB42	100128927	0.6306	0.0112	zinc finger and BTB domain containing 42								ZBTB42	0.6306
947	LPAR5	57121	0.6304	0.0076	lysophosphatidic acid receptor 5								LPAR5	0.6304
948	TLE3	7090	0.6295	0.0236	transducin-like enhancer of split 3 (E(sp1) homolog, Drosophila)								TLE3	0.6295
949	TSTA3	7264	0.6291	0.1038	tissue specific transplantation antigen P35B								TSTA3	0.6291
950	EPHA2	1969	0.6289	0.0321	EPH receptor A2								EPHA2	0.6289
951	SMO	6608	0.6285	0.0439	smoothened, frizzled family receptor								SMO	0.6285
952	DPP7	29952	0.6285	0.0872	dipeptidyl-peptidase 7								DPP7	0.6285
953	PITX3	5309	0.6283	0.1772	paired-like homeodomain 3								PITX3	0.6283
954	C11ORF86	254439	0.6281	0.1231	chromosome 11 open reading frame 86								C11ORF86	0.6281
955	GAB3	139716	0.6279	0.0373	GRB2-associated binding protein 3								GAB3	0.6279
956	PNP	4860	0.6274	0.0513	purine nucleoside phosphorylase								PNP	0.6274
957	MMP2	4313	0.6274	0.0702	matrix metallopeptidase 2 (gelatinase A, 72kDa gelatinase, 72kDa type IV collagenase)								MMP2	0.6274
958	TRAF4	9618	0.6273	0.0277	TNF receptor-associated factor 4								TRAF4	0.6273
959	FAM83A	84985	0.6271	0.0487	family with sequence similarity 83, member A								FAM83A	0.6271
960	CARD11	84433	0.6271	0.0347	caspase recruitment domain family, member 11								CARD11	0.6271
961	GPR97	222487	0.6267	0.0616	G protein-coupled receptor 97								GPR97	0.6267
962	HES7	84667	0.6265	0.0299	hairy and enhancer of split 7 (Drosophila)								HES7	0.6265
963	HLA-DOA	3111	0.6265	0.0704	major histocompatibility complex, class II, DO alpha								HLA-DOA	0.6265
964	EXOC3L2	90332	0.6264	0.1636	exocyst complex component 3-like 2								EXOC3L2	0.6264
965	GTSE1	51512	0.6263	0.089	G-2 and S-phase expressed 1								GTSE1	0.6263
966	MVK	4598	0.626	0.116	mevalonate kinase								MVK	0.626
967	WBSCR27	155368	0.6258	0.0131	Williams Beuren syndrome chromosome region 27								WBSCR27	0.6258
968	WDR24	84219	0.6252	0.0608	WD repeat domain 24								WDR24	0.6252
969	MOS	4342	0.6251	0.0611	v-mos Moloney murine sarcoma viral oncogene homolog								MOS	0.6251
970	C1ORF35	79169	0.6244	0.0612	chromosome 1 open reading frame 35								C1ORF35	0.6244
971	HNF1A	6927	0.6243	0.1375	HNF1 homeobox A								HNF1A	0.6243
972	WEE1	7465	0.6242	0.031	WEE1 homolog (S. pombe)								WEE1	0.6242
973	RECQL4	9401	0.6233	0.1121	RecQ protein-like 4								RECQL4	0.6233
974	RUNX1-IT1	80215	0.623	0.0266	RUNX1 intronic transcript 1 (non-protein coding)								RUNX1-IT1	0.623
975	STARD10	10809	0.6223	0.0605	StAR-related lipid transfer (START) domain containing 10								STARD10	0.6223
976	HAGHL	84264	0.6222	0.0715	hydroxyacylglutathione hydrolase-like								HAGHL	0.6222
977	ESRRA	2101	0.6222	0.0753	estrogen-related receptor alpha								ESRRA	0.6222
978	RPL12	6136	0.6222	0.0286	ribosomal protein L12								RPL12	0.6222
979	RNF31	55072	0.6221	0.0523	ring finger protein 31								RNF31	0.6221
980	C2	717	0.622	0.0507	complement component 2								C2	0.622
981	ADM2	79924	0.6219	0.1863	adrenomedullin 2								ADM2	0.6219
982	NFAM1	150372	0.6219	0.107	NFAT activating protein with ITAM motif 1								NFAM1	0.6219
983	CAPN1	823	0.6215	0.1105	calpain 1, (mu/I) large subunit								CAPN1	0.6215
984	ZC3H18	124245	0.6215	0.0586	zinc finger CCCH-type containing 18								ZC3H18	0.6215
985	PIF1	80119	0.6211	0.037	PIF1 5'-to-3' DNA helicase homolog (S. cerevisiae)								PIF1	0.6211
986	SLC37A2	219855	0.6209	0.0245	solute carrier family 37 (glycerol-3-phosphate transporter), member 2								SLC37A2	0.6209
987	S100A11	6282	0.6209	0.0896	S100 calcium binding protein A11								S100A11	0.6209
988	KCTD5	54442	0.6209	0.0529	potassium channel tetramerisation domain containing 5								KCTD5	0.6209
989	SPNS3	201305	0.6208	0.0295	spinster homolog 3 (Drosophila)								SPNS3	0.6208
990	MARVELD1	83742	0.6207	0.0453	MARVEL domain containing 1								MARVELD1	0.6207
991	DCPS	28960	0.6204	0.0869	decapping enzyme, scavenger								DCPS	0.6204
992	RTEL1	51750	0.6203	0.141	regulator of telomere elongation helicase 1								RTEL1	0.6203
993	RFNG	5986	0.6202	0.1021	RFNG O-fucosylpeptide 3-beta-N-acetylglucosaminyltransferase								RFNG	0.6202
994	PIK3R6	146850	0.6201	0.0248	phosphoinositide-3-kinase, regulatory subunit 6								PIK3R6	0.6201
995	MAP3K3	4215	0.62	0.0662	mitogen-activated protein kinase kinase kinase 3								MAP3K3	0.62
996	NDE1	54820	0.6199	0.0218	nudE nuclear distribution E homolog 1 (A. nidulans)								NDE1	0.6199
997	DHRS13	147015	0.6199	0.0247	dehydrogenase/reductase (SDR family) member 13								DHRS13	0.6199
998	MBD6	114785	0.6199	0.0515	methyl-CpG binding domain protein 6								MBD6	0.6199
999	ESPL1	9700	0.6198	0.0809	extra spindle pole bodies homolog 1 (S. cerevisiae)								ESPL1	0.6198
1000	SOX21	11166	0.6198	0.1294	SRY (sex determining region Y)-box 21								SOX21	0.6198
1001	TNNI2	7136	0.6196	0.038	troponin I type 2 (skeletal, fast)								TNNI2	0.6196
1002	CCDC19	25790	0.6196	0.0151	coiled-coil domain containing 19								CCDC19	0.6196
1003	LPIN3	64900	0.6194	0.0584	lipin 3								LPIN3	0.6194
1004	C20ORF166	128826	0.6192	0.0533	chromosome 20 open reading frame 166								C20ORF166	0.6192
1005	REEP6	92840	0.6186	0.0362	receptor accessory protein 6								REEP6	0.6186
1006	SLC5A2	6524	0.6186	0.1988	solute carrier family 5 (sodium/glucose cotransporter), member 2								SLC5A2	0.6186
1007	EFNB1	1947	0.6186	0.0362	ephrin-B1								EFNB1	0.6186
1008	AEBP1	165	0.6184	0.0532	AE binding protein 1								AEBP1	0.6184
1009	ST14	6768	0.6183	0.0428	suppression of tumorigenicity 14 (colon carcinoma)								ST14	0.6183
1010	CCDC88B	283234	0.6181	0.0829	coiled-coil domain containing 88B								CCDC88B	0.6181
1011	SRC	6714	0.618	0.1014	v-src sarcoma (Schmidt-Ruppin A-2) viral oncogene homolog (avian)								SRC	0.618
1012	ELMO3	79767	0.6178	0.0298	engulfment and cell motility 3								ELMO3	0.6178
1013	TAL1	6886	0.6178	0.0632	T-cell acute lymphocytic leukemia 1								TAL1	0.6178
1014	RRNAD1	51093	0.6178	0.0617	ribosomal RNA adenine dimethylase domain containing 1								RRNAD1	0.6178
1015	PCSK7	9159	0.6175	0.0525	proprotein convertase subtilisin/kexin type 7								PCSK7	0.6175
1016	JUND	3727	0.6172	0.047	jun D proto-oncogene								JUND	0.6172
1017	TOR2A	27433	0.6172	0.0275	torsin family 2, member A								TOR2A	0.6172
1018	PKP3	11187	0.617	0.08	plakophilin 3								PKP3	0.617
1019	PGLYRP1	8993	0.6166	0.0823	peptidoglycan recognition protein 1								PGLYRP1	0.6166
1020	ZNF384	171017	0.6163	0.0564	zinc finger protein 384								ZNF384	0.6163
1021	MYL9	10398	0.6163	0.0621	myosin, light chain 9, regulatory								MYL9	0.6163
1022	CCDC9	26093	0.616	0.1863	coiled-coil domain containing 9								CCDC9	0.616
1023	FOXD2	2306	0.616	0.0061	forkhead box D2								FOXD2	0.616
1024	EMILIN2	84034	0.6158	0.0349	elastin microfibril interfacer 2								EMILIN2	0.6158
1025	ST3GAL1	6482	0.6157	0.0255	ST3 beta-galactoside alpha-2,3-sialyltransferase 1								ST3GAL1	0.6157
1026	TNFRSF14	8764	0.6156	0.0679	tumor necrosis factor receptor superfamily, member 14								TNFRSF14	0.6156
1027	GPR137	56834	0.6156	0.1277	G protein-coupled receptor 137								GPR137	0.6156
1028	C19ORF48	84798	0.6154	0.1036	chromosome 19 open reading frame 48								C19ORF48	0.6154
1029	CTSG	1511	0.6154	0.0383	cathepsin G								CTSG	0.6154
1030	ENTHD2	146705	0.6153	0.0431	ENTH domain containing 2								ENTHD2	0.6153
1031	C17ORF53	78995	0.6152	0.1032	chromosome 17 open reading frame 53								C17ORF53	0.6152
1032	FLVCR2	55640	0.6149	0.021	feline leukemia virus subgroup C cellular receptor family, member 2								FLVCR2	0.6149
1033	MYD88	4615	0.6148	0.0693	myeloid differentiation primary response gene (88)								MYD88	0.6148
1034	PARVB	29780	0.6148	0.0312	parvin, beta								PARVB	0.6148
1035	ATF5	22809	0.6146	0.0233	activating transcription factor 5								ATF5	0.6146
1036	IL18BP	10068	0.6146	0.046	interleukin 18 binding protein								IL18BP	0.6146
1037	CD28	940	0.6145	0.0294	CD28 molecule								CD28	0.6145
1038	PLCD1	5333	0.6141	0.1068	phospholipase C, delta 1								PLCD1	0.6141
1039	UAP1L1	91373	0.614	0.0197	UDP-N-acteylglucosamine pyrophosphorylase 1-like 1								UAP1L1	0.614
1040	RHOH	399	0.614	0.0312	ras homolog family member H								RHOH	0.614
1041	OLFML2A	169611	0.614	0.0434	olfactomedin-like 2A								OLFML2A	0.614
1042	ABTB2	25841	0.6138	0.0349	ankyrin repeat and BTB (POZ) domain containing 2								ABTB2	0.6138
1043	SMAD6	4091	0.6137	0.0291	SMAD family member 6								SMAD6	0.6137
1044	GPR4	2828	0.6136	0.146	G protein-coupled receptor 4								GPR4	0.6136
1045	TOMM40	10452	0.6135	0.1299	translocase of outer mitochondrial membrane 40 homolog (yeast)								TOMM40	0.6135
1046	GPX7	2882	0.6135	0.0121	glutathione peroxidase 7								GPX7	0.6135
1047	GDF5	8200	0.6134	0.1241	growth differentiation factor 5								GDF5	0.6134
1048	STAT3	6774	0.6133	0.085	signal transducer and activator of transcription 3 (acute-phase response factor)								STAT3	0.6133
1049	HSD17B1	3292	0.6131	0.0084	hydroxysteroid (17-beta) dehydrogenase 1								HSD17B1	0.6131
1050	NCR3	259197	0.613	0.0972	natural cytotoxicity triggering receptor 3								NCR3	0.613
1051	FLJ45983	399717	0.613	0.0745	uncharacterized LOC399717								FLJ45983	0.613
1052	HLA-B	3106	0.6128	0.1047	major histocompatibility complex, class I, B								HLA-B	0.6128
1053	HDAC6	10013	0.6128	0.0962	histone deacetylase 6								HDAC6	0.6128
1054	CCDC86	79080	0.6125	0.1039	coiled-coil domain containing 86								CCDC86	0.6125
1055	PARS2	25973	0.6122	0.0219	prolyl-tRNA synthetase 2, mitochondrial (putative)								PARS2	0.6122
1056	PTGER1	5731	0.6121	0.2005	prostaglandin E receptor 1 (subtype EP1), 42kDa								PTGER1	0.6121
1057	KIF7	374654	0.6121	0.0278	kinesin family member 7								KIF7	0.6121
1058	GTPBP1	9567	0.612	0.0852	GTP binding protein 1								GTPBP1	0.612
1059	MYH14	79784	0.6119	0.1951	myosin, heavy chain 14, non-muscle								MYH14	0.6119
1060	DNMT3A	1788	0.6119	0.012	DNA (cytosine-5-)-methyltransferase 3 alpha								DNMT3A	0.6119
1061	FCN1	2219	0.6115	0.0547	ficolin (collagen/fibrinogen domain containing) 1								FCN1	0.6115
1062	LTB	4050	0.6112	0.0508	lymphotoxin beta (TNF superfamily, member 3)								LTB	0.6112
1063	SMAGP	57228	0.6111	0.0117	small cell adhesion glycoprotein								SMAGP	0.6111
1064	ILVBL	10994	0.6111	0.0736	ilvB (bacterial acetolactate synthase)-like								ILVBL	0.6111
1065	C2ORF18	54978	0.611	0.0688	chromosome 2 open reading frame 18								C2ORF18	0.611
1066	CD300A	11314	0.611	0.0592	CD300a molecule								CD300A	0.611
1067	RAB32	10981	0.611	0.0418	RAB32, member RAS oncogene family								RAB32	0.611
1068	DNLZ	728489	0.6107	0.0483	DNL-type zinc finger								DNLZ	0.6107
1069	FURIN	5045	0.6107	0.1169	furin (paired basic amino acid cleaving enzyme)								FURIN	0.6107
1070	CIB2	10518	0.6107	0.0393	calcium and integrin binding family member 2								CIB2	0.6107
1071	MYC	4609	0.6105	0.0248	v-myc myelocytomatosis viral oncogene homolog (avian)								MYC	0.6105
1072	CFB	629	0.6102	0.0366	complement factor B								CFB	0.6102
1073	MAD1L1	8379	0.6102	0.0521	MAD1 mitotic arrest deficient-like 1 (yeast)								MAD1L1	0.6102
1074	ODF3B	440836	0.6101	0.0616	outer dense fiber of sperm tails 3B								ODF3B	0.6101
1075	COMMD4	54939	0.61	0.1091	COMM domain containing 4								COMMD4	0.61
1076	GCHFR	2644	0.61	0.0292	GTP cyclohydrolase I feedback regulator								GCHFR	0.61
1077	DMPK	1760	0.61	0.0875	dystrophia myotonica-protein kinase								DMPK	0.61
1078	JPH2	57158	0.6097	0.1582	junctophilin 2								JPH2	0.6097
1079	COL18A1	80781	0.6096	0.0475	collagen, type XVIII, alpha 1								COL18A1	0.6096
1080	GDPD3	79153	0.6094	0.0166	glycerophosphodiester phosphodiesterase domain containing 3								GDPD3	0.6094
1081	PSMB10	5699	0.6093	0.0926	proteasome (prosome, macropain) subunit, beta type, 10								PSMB10	0.6093
1082	PLCB3	5331	0.609	0.034	phospholipase C, beta 3 (phosphatidylinositol-specific)								PLCB3	0.609
1083	GMPPB	29925	0.6088	0.0569	GDP-mannose pyrophosphorylase B								GMPPB	0.6088
1084	SERTAD3	29946	0.6086	0.0209	SERTA domain containing 3								SERTAD3	0.6086
1085	SLAMF7	57823	0.6085	0.049	SLAM family member 7								SLAMF7	0.6085
1086	HOMER3	9454	0.6084	0.0461	homer homolog 3 (Drosophila)								HOMER3	0.6084
1087	MED25	81857	0.6084	0.0537	mediator complex subunit 25								MED25	0.6084
1088	OVOL3	728361	0.6084	0.2136	ovo-like 3 (Drosophila)								OVOL3	0.6084
1089	TELO2	9894	0.6083	0.1194	TEL2, telomere maintenance 2, homolog (S. cerevisiae)								TELO2	0.6083
1090	RNF126	55658	0.6081	0.0972	ring finger protein 126								RNF126	0.6081
1091	STK11	6794	0.608	0.1362	serine/threonine kinase 11								STK11	0.608
1092	E2F1	1869	0.608	0.1076	E2F transcription factor 1								E2F1	0.608
1093	TRIM38	10475	0.6079	0.0912	tripartite motif containing 38								TRIM38	0.6079
1094	NPEPL1	79716	0.6077	0.0977	aminopeptidase-like 1								NPEPL1	0.6077
1095	C17ORF82	388407	0.6076	0.1433	chromosome 17 open reading frame 82								C17ORF82	0.6076
1096	COX6A2	1339	0.6072	0.0419	cytochrome c oxidase subunit VIa polypeptide 2								COX6A2	0.6072
1097	LOXL3	84695	0.6072	0.026	lysyl oxidase-like 3								LOXL3	0.6072
1098	RGS3	5998	0.6072	0.0104	regulator of G-protein signaling 3								RGS3	0.6072
1099	EBI3	10148	0.6071	0.0521	Epstein-Barr virus induced 3								EBI3	0.6071
1100	CHPF	79586	0.607	0.1114	chondroitin polymerizing factor								CHPF	0.607
1101	GLYCTK	132158	0.607	0.0417	glycerate kinase								GLYCTK	0.607
1102	TAPBPL	55080	0.6069	0.0494	TAP binding protein-like								TAPBPL	0.6069
1103	RXFP3	51289	0.6069	0.0673	relaxin/insulin-like family peptide receptor 3								RXFP3	0.6069
1104	FGF11	2256	0.6067	0.0479	fibroblast growth factor 11								FGF11	0.6067
1105	MYO15B	80022	0.6065	0.0929	myosin XVB pseudogene								MYO15B	0.6065
1106	MICB	4277	0.6064	0.0308	MHC class I polypeptide-related sequence B								MICB	0.6064
1107	GZMH	2999	0.6064	0.0368	granzyme H (cathepsin G-like 2, protein h-CCPX)								GZMH	0.6064
1108	PPDPF	79144	0.6062	0.0711	pancreatic progenitor cell differentiation and proliferation factor homolog (zebrafish)								PPDPF	0.6062
1109	RENBP	5973	0.6061	0.0811	renin binding protein								RENBP	0.6061
1110	TNIP1	10318	0.606	0.0837	TNFAIP3 interacting protein 1								TNIP1	0.606
1111	RAB38	23682	0.606	0.0037	RAB38, member RAS oncogene family								RAB38	0.606
1112	TCF24	100129654	0.606	0	transcription factor 24								TCF24	0.606
1113	RNF26	79102	0.6059	0.1104	ring finger protein 26								RNF26	0.6059
1114	RASIP1	54922	0.6059	0.0203	Ras interacting protein 1								RASIP1	0.6059
1115	KEL	3792	0.6059	0.1065	Kell blood group, metallo-endopeptidase								KEL	0.6059
1116	DRG2	1819	0.6049	0.1128	developmentally regulated GTP binding protein 2								DRG2	0.6049
1117	C16ORF86	388284	0.6043	0.1094	chromosome 16 open reading frame 86								C16ORF86	0.6043
1118	TIMM44	10469	0.6043	0.1027	translocase of inner mitochondrial membrane 44 homolog (yeast)								TIMM44	0.6043
1119	PRSS8	5652	0.6039	0.048	protease, serine, 8								PRSS8	0.6039
1120	CORO7	79585	0.6036	0.0977	coronin 7								CORO7	0.6036
1121	KLHL36	79786	0.6035	0.0299	kelch-like 36 (Drosophila)								KLHL36	0.6035
1122	NAGA	4668	0.6033	0.0739	N-acetylgalactosaminidase, alpha-								NAGA	0.6033
1123	ALDH3A1	218	0.6033	0.0241	aldehyde dehydrogenase 3 family, member A1								ALDH3A1	0.6033
1124	LCN6	158062	0.6033	0	lipocalin 6								LCN6	0.6033
1125	P2RY2	5029	0.6028	0.0186	purinergic receptor P2Y, G-protein coupled, 2								P2RY2	0.6028
1126	SLC12A3	6559	0.6025	0.1529	solute carrier family 12 (sodium/chloride transporters), member 3								SLC12A3	0.6025
1127	STX11	8676	0.6024	0.0571	syntaxin 11								STX11	0.6024
1128	CPZ	8532	0.6014	0.0794	carboxypeptidase Z								CPZ	0.6014
1129	B3GNT3	10331	0.6014	0.1055	UDP-GlcNAc:betaGal beta-1,3-N-acetylglucosaminyltransferase 3								B3GNT3	0.6014
1130	VANGL1	81839	0.6014	0.025	vang-like 1 (van gogh, Drosophila)								VANGL1	0.6014
1131	TYSND1	219743	0.6014	0.054	trypsin domain containing 1								TYSND1	0.6014
1132	SOX3	6658	0.6011	0.0501	SRY (sex determining region Y)-box 3								SOX3	0.6011
1133	COMTD1	118881	0.601	0.0807	catechol-O-methyltransferase domain containing 1								COMTD1	0.601
1134	GZMB	3002	0.6009	0.0346	granzyme B (granzyme 2, cytotoxic T-lymphocyte-associated serine esterase 1)								GZMB	0.6009
1135	UBXN1	51035	0.6009	0.0872	UBX domain protein 1								UBXN1	0.6009
1136	TEX264	51368	0.6006	0.1183	testis expressed 264								TEX264	0.6006
1137	CASKIN2	57513	0.6005	0.0851	CASK interacting protein 2								CASKIN2	0.6005
1138	UNC45A	55898	0.6004	0.092	unc-45 homolog A (C. elegans)								UNC45A	0.6004
1139	SALL4	57167	0.6	0.0281	sal-like 4 (Drosophila)								SALL4	0.6
1140	NUAK2	81788	0.5995	0.0105	NUAK family, SNF1-like kinase, 2								NUAK2	0.5995
1141	SETD1A	9739	0.5993	0.0811	SET domain containing 1A								SETD1A	0.5993
1142	TMEM86B	255043	0.5991	0.0348	transmembrane protein 86B								TMEM86B	0.5991
1143	FLNC	2318	0.599	0.0441	filamin C, gamma								FLNC	0.599
1144	STEAP3	55240	0.599	0.0124	STEAP family member 3, metalloreductase								STEAP3	0.599
1145	MTFP1	51537	0.5989	0.0728	mitochondrial fission process 1								MTFP1	0.5989
1146	STARD8	9754	0.5986	0.0478	StAR-related lipid transfer (START) domain containing 8								STARD8	0.5986
1147	SOD3	6649	0.5984	0.1144	superoxide dismutase 3, extracellular								SOD3	0.5984
1148	GPBAR1	151306	0.5982	0.0887	G protein-coupled bile acid receptor 1								GPBAR1	0.5982
1149	VAMP5	10791	0.5981	0.0682	vesicle-associated membrane protein 5 (myobrevin)								VAMP5	0.5981
1150	TJP3	27134	0.5979	0.107	tight junction protein 3								TJP3	0.5979
1151	TBL3	10607	0.5977	0.1184	transducin (beta)-like 3								TBL3	0.5977
1152	MUC1	4582	0.5976	0.046	mucin 1, cell surface associated								MUC1	0.5976
1153	EGFL7	51162	0.5973	0.0974	EGF-like-domain, multiple 7								EGFL7	0.5973
1154	CCDC120	90060	0.5972	0.0408	coiled-coil domain containing 120								CCDC120	0.5972
1155	ZDHHC8	29801	0.5972	0.0581	zinc finger, DHHC-type containing 8								ZDHHC8	0.5972
1156	PATZ1	23598	0.5972	0.0702	POZ (BTB) and AT hook containing zinc finger 1								PATZ1	0.5972
1157	KRT81	3887	0.5971	0.0434	keratin 81								KRT81	0.5971
1158	NRTN	4902	0.597	0.0149	neurturin								NRTN	0.597
1159	TES	26136	0.5969	0.0286	testis derived transcript (3 LIM domains)								TES	0.5969
1160	MYLPF	29895	0.5969	0.0577	myosin light chain, phosphorylatable, fast skeletal muscle								MYLPF	0.5969
1161	CDA	978	0.5966	0.0372	cytidine deaminase								CDA	0.5966
1162	ZNF503-AS2	100131213	0.5966	0.2068	ZNF503 antisense RNA 2 (non-protein coding)								ZNF503-AS2	0.5966
1163	CLDN7	1366	0.5963	0.025	claudin 7								CLDN7	0.5963
1164	TMEM201	199953	0.596	0.047	transmembrane protein 201								TMEM201	0.596
1165	RPS2	6187	0.5959	0.0443	ribosomal protein S2								RPS2	0.5959
1166	TM9SF1	10548	0.5954	0.117	transmembrane 9 superfamily member 1								TM9SF1	0.5954
1167	LOC100128881	100128881	0.5953	0	uncharacterized LOC100128881								LOC100128881	0.5953
1168	POU2F2	5452	0.5952	0.0985	POU class 2 homeobox 2								POU2F2	0.5952
1169	LEMD2	221496	0.5952	0.0581	LEM domain containing 2								LEMD2	0.5952
1170	ADAMTSL5	339366	0.5951	0.0961	ADAMTS-like 5								ADAMTSL5	0.5951
1171	BIRC5	332	0.5949	0.1072	baculoviral IAP repeat containing 5								BIRC5	0.5949
1172	PDLIM1	9124	0.5947	0.0177	PDZ and LIM domain 1								PDLIM1	0.5947
1173	GRAP	10750	0.5946	0.0446	GRB2-related adaptor protein								GRAP	0.5946
1174	GLTPD2	388323	0.5945	0.063	glycolipid transfer protein domain containing 2								GLTPD2	0.5945
1175	DHX34	9704	0.5942	0.0875	DEAH (Asp-Glu-Ala-His) box polypeptide 34								DHX34	0.5942
1176	SLC35C1	55343	0.5942	0.0922	solute carrier family 35, member C1								SLC35C1	0.5942
1177	PPP1CA	5499	0.5942	0.1624	protein phosphatase 1, catalytic subunit, alpha isozyme								PPP1CA	0.5942
1178	AURKB	9212	0.5941	0.1132	aurora kinase B								AURKB	0.5941
1179	LEPRE1	64175	0.5941	0.0704	leucine proline-enriched proteoglycan (leprecan) 1								LEPRE1	0.5941
1180	ZNF768	79724	0.5937	0.0796	zinc finger protein 768								ZNF768	0.5937
1181	AFAP1L1	134265	0.5936	0.0156	actin filament associated protein 1-like 1								AFAP1L1	0.5936
1182	ACTN3	89	0.5934	0.0675	actinin, alpha 3								ACTN3	0.5934
1183	LRRC45	201255	0.5933	0.0968	leucine rich repeat containing 45								LRRC45	0.5933
1184	KLF4	9314	0.5932	0.0369	Kruppel-like factor 4 (gut)								KLF4	0.5932
1185	TNFAIP8L2	79626	0.593	0.0576	tumor necrosis factor, alpha-induced protein 8-like 2								TNFAIP8L2	0.593
1186	KREMEN2	79412	0.5928	0.0875	kringle containing transmembrane protein 2								KREMEN2	0.5928
1187	PNKP	11284	0.5926	0.1022	polynucleotide kinase 3'-phosphatase								PNKP	0.5926
1188	BARX1	56033	0.5925	0.0651	BARX homeobox 1								BARX1	0.5925
1189	WT1-AS	51352	0.5924	0.0938	WT1 antisense RNA (non-protein coding)								WT1-AS	0.5924
1190	CLDN6	9074	0.5922	0.0321	claudin 6								CLDN6	0.5922
1191	BET1L	51272	0.592	0.0452	blocked early in transport 1 homolog (S. cerevisiae)-like								BET1L	0.592
1192	LRG1	116844	0.5918	0.0295	leucine-rich alpha-2-glycoprotein 1								LRG1	0.5918
1193	KRT23	25984	0.5916	0.0172	keratin 23 (histone deacetylase inducible)								KRT23	0.5916
1194	PCSK4	54760	0.5916	0.1223	proprotein convertase subtilisin/kexin type 4								PCSK4	0.5916
1195	FOXM1	2305	0.5916	0.1105	forkhead box M1								FOXM1	0.5916
1196	CNTD2	79935	0.5911	0.1772	cyclin N-terminal domain containing 2								CNTD2	0.5911
1197	PTGS1	5742	0.591	0.0286	prostaglandin-endoperoxide synthase 1 (prostaglandin G/H synthase and cyclooxygenase)								PTGS1	0.591
1198	IL6R	3570	0.591	0.0273	interleukin 6 receptor								IL6R	0.591
1199	ADRM1	11047	0.591	0.1635	adhesion regulating molecule 1								ADRM1	0.591
1200	MRPL11	65003	0.5909	0.1272	mitochondrial ribosomal protein L11								MRPL11	0.5909
1201	GDF11	10220	0.5909	0.0153	growth differentiation factor 11								GDF11	0.5909
1202	ST6GALNAC2	10610	0.5907	0.0197	ST6 (alpha-N-acetyl-neuraminyl-2,3-beta-galactosyl-1,3)-N-acetylgalactosaminide alpha-2,6-sialyltransferase 2								ST6GALNAC2	0.5907
1203	SIGLEC9	27180	0.5906	0.1097	sialic acid binding Ig-like lectin 9								SIGLEC9	0.5906
1204	BST2	684	0.5904	0.0489	bone marrow stromal cell antigen 2								BST2	0.5904
1205	UCA1	652995	0.5903	0.0195	urothelial cancer associated 1 (non-protein coding)								UCA1	0.5903
1206	SNX33	257364	0.59	0.0792	sorting nexin 33								SNX33	0.59
1207	SPAG4	6676	0.5899	0.0107	sperm associated antigen 4								SPAG4	0.5899
1208	PLEK2	26499	0.5899	0.0237	pleckstrin 2								PLEK2	0.5899
1209	SLC50A1	55974	0.5898	0.0386	solute carrier family 50 (sugar transporter), member 1								SLC50A1	0.5898
1210	MMP19	4327	0.5896	0.164	matrix metallopeptidase 19								MMP19	0.5896
1211	VPS37B	79720	0.5894	0.0648	vacuolar protein sorting 37 homolog B (S. cerevisiae)								VPS37B	0.5894
1212	FOXD3	27022	0.5893	0.0374	forkhead box D3								FOXD3	0.5893
1213	KDM4B	23030	0.5892	0.0698	lysine (K)-specific demethylase 4B								KDM4B	0.5892
1214	FAM178B	51252	0.5889	0.1267	family with sequence similarity 178, member B								FAM178B	0.5889
1215	CYP21A2	1589	0.5888	0.0402	cytochrome P450, family 21, subfamily A, polypeptide 2								CYP21A2	0.5888
1216	LY9	4063	0.5886	0.0685	lymphocyte antigen 9								LY9	0.5886
1217	NCF4	4689	0.5885	0.0724	neutrophil cytosolic factor 4, 40kDa								NCF4	0.5885
1218	EEFSEC	60678	0.5884	0.0674	eukaryotic elongation factor, selenocysteine-tRNA-specific								EEFSEC	0.5884
1219	PBXIP1	57326	0.5884	0.1125	pre-B-cell leukemia homeobox interacting protein 1								PBXIP1	0.5884
1220	PPARA	5465	0.5884	0.0336	peroxisome proliferator-activated receptor alpha								PPARA	0.5884
1221	GINS4	84296	0.5881	0.0714	GINS complex subunit 4 (Sld5 homolog)								GINS4	0.5881
1222	KLF2	10365	0.5881	0.0424	Kruppel-like factor 2 (lung)								KLF2	0.5881
1223	MIXL1	83881	0.5881	0.0584	Mix paired-like homeobox								MIXL1	0.5881
1224	ICAM4	3386	0.5881	0.0066	intercellular adhesion molecule 4 (Landsteiner-Wiener blood group)								ICAM4	0.5881
1225	PIK3CD	5293	0.5879	0.0594	phosphatidylinositol-4,5-bisphosphate 3-kinase, catalytic subunit delta								PIK3CD	0.5879
1226	CDCP1	64866	0.5879	0.0303	CUB domain containing protein 1								CDCP1	0.5879
1227	DNAI2	64446	0.5878	0.0875	dynein, axonemal, intermediate chain 2								DNAI2	0.5878
1228	TNFRSF10A	8797	0.5876	0.0191	tumor necrosis factor receptor superfamily, member 10a								TNFRSF10A	0.5876
1229	HEXDC	284004	0.5874	0.076	hexosaminidase (glycosyl hydrolase family 20, catalytic domain) containing								HEXDC	0.5874
1230	FUK	197258	0.5874	0.0669	fucokinase								FUK	0.5874
1231	SYTL3	94120	0.5872	0.0184	synaptotagmin-like 3								SYTL3	0.5872
1232	SLC38A5	92745	0.5869	0.0115	solute carrier family 38, member 5								SLC38A5	0.5869
1233	EVC	2121	0.5869	0.1129	Ellis van Creveld syndrome								EVC	0.5869
1234	SYNGR2	9144	0.5867	0.0795	synaptogyrin 2								SYNGR2	0.5867
1235	PRR15	222171	0.5864	0.0112	proline rich 15								PRR15	0.5864
1236	PIDD	55367	0.5863	0.1011	p53-induced death domain protein								PIDD	0.5863
1237	ODF3	113746	0.586	0.1613	outer dense fiber of sperm tails 3								ODF3	0.586
1238	SLC4A1	6521	0.5859	0.1678	solute carrier family 4, anion exchanger, member 1 (erythrocyte membrane protein band 3, Diego blood group)								SLC4A1	0.5859
1239	LOC100130872	100130872	0.5858	0.1219	uncharacterized LOC100130872								LOC100130872	0.5858
1240	PRSS21	10942	0.5857	0.0018	protease, serine, 21 (testisin)								PRSS21	0.5857
1241	LOC100128374	100128374	0.5857	0	uncharacterized LOC100128374								LOC100128374	0.5857
1242	RBM15B	29890	0.5857	0.0471	RNA binding motif protein 15B								RBM15B	0.5857
1243	SH3GL1	6455	0.5854	0.0999	SH3-domain GRB2-like 1								SH3GL1	0.5854
1244	SAMD10	140700	0.5854	0.0941	sterile alpha motif domain containing 10								SAMD10	0.5854
1245	LOXL4	84171	0.5851	0.0341	lysyl oxidase-like 4								LOXL4	0.5851
1246	UBE2C	11065	0.5851	0.0942	ubiquitin-conjugating enzyme E2C								UBE2C	0.5851
1247	NPC1L1	29881	0.585	0.1463	NPC1 (Niemann-Pick disease, type C1, gene)-like 1								NPC1L1	0.585
1248	C19ORF43	79002	0.5849	0.094	chromosome 19 open reading frame 43								C19ORF43	0.5849
1249	COBRA1	25920	0.5849	0.1467	cofactor of BRCA1								COBRA1	0.5849
1250	CD82	3732	0.5846	0.0612	CD82 molecule								CD82	0.5846
1251	AEN	64782	0.5844	0.0465	apoptosis enhancing nuclease								AEN	0.5844
1252	MTHFR	4524	0.5842	0.1153	methylenetetrahydrofolate reductase (NAD(P)H)								MTHFR	0.5842
1253	GRIN2D	2906	0.5842	0.1341	glutamate receptor, ionotropic, N-methyl D-aspartate 2D								GRIN2D	0.5842
1254	WDR62	284403	0.584	0.1295	WD repeat domain 62								WDR62	0.584
1255	IL2RB	3560	0.5838	0.0495	interleukin 2 receptor, beta								IL2RB	0.5838
1256	FAM46B	115572	0.5836	0.0156	family with sequence similarity 46, member B								FAM46B	0.5836
1257	BIK	638	0.5835	0.006	BCL2-interacting killer (apoptosis-inducing)								BIK	0.5835
1258	FOXP3	50943	0.5835	0.1731	forkhead box P3								FOXP3	0.5835
1259	REPIN1	29803	0.5832	0.0373	replication initiator 1								REPIN1	0.5832
1260	TACC3	10460	0.5832	0.1261	transforming, acidic coiled-coil containing protein 3								TACC3	0.5832
1261	S100A4	6275	0.583	0.0641	S100 calcium binding protein A4								S100A4	0.583
1262	AIP	9049	0.5828	0.1102	aryl hydrocarbon receptor interacting protein								AIP	0.5828
1263	EXOSC4	54512	0.5828	0.1316	exosome component 4								EXOSC4	0.5828
1264	C14ORF43	91748	0.5827	0.0215	chromosome 14 open reading frame 43								C14ORF43	0.5827
1265	MAFK	7975	0.5822	0.0491	v-maf musculoaponeurotic fibrosarcoma oncogene homolog K (avian)								MAFK	0.5822
1266	ANG	283	0.5821	0.0436	angiogenin, ribonuclease, RNase A family, 5								ANG	0.5821
1267	PI3	5266	0.582	0.0447	peptidase inhibitor 3, skin-derived								PI3	0.582
1268	SERPINA1	5265	0.582	0.054	serpin peptidase inhibitor, clade A (alpha-1 antiproteinase, antitrypsin), member 1								SERPINA1	0.582
1269	ITGB5	3693	0.582	0.0658	integrin, beta 5								ITGB5	0.582
1270	KIFC3	3801	0.5817	0.1049	kinesin family member C3								KIFC3	0.5817
1271	CDPF1	150383	0.5817	0.0277	cysteine-rich, DPF motif domain containing 1								CDPF1	0.5817
1272	FGF4	2249	0.5815	0.0369	fibroblast growth factor 4								FGF4	0.5815
1273	C17ORF49	124944	0.5815	0.0887	chromosome 17 open reading frame 49								C17ORF49	0.5815
1274	CEACAM3	1084	0.5813	0.1839	carcinoembryonic antigen-related cell adhesion molecule 3								CEACAM3	0.5813
1275	GNG8	94235	0.5811	0.0165	guanine nucleotide binding protein (G protein), gamma 8								GNG8	0.5811
1276	ACTG2	72	0.581	0.0288	actin, gamma 2, smooth muscle, enteric								ACTG2	0.581
1277	DUS3L	56931	0.5809	0.0986	dihydrouridine synthase 3-like (S. cerevisiae)								DUS3L	0.5809
1278	OGFOD2	79676	0.5807	0.1012	2-oxoglutarate and iron-dependent oxygenase domain containing 2								OGFOD2	0.5807
1279	LIG1	3978	0.5807	0.1078	ligase I, DNA, ATP-dependent								LIG1	0.5807
1280	HSD17B10	3028	0.5807	0.1519	hydroxysteroid (17-beta) dehydrogenase 10								HSD17B10	0.5807
1281	BATF2	116071	0.5804	0.0361	basic leucine zipper transcription factor, ATF-like 2								BATF2	0.5804
1282	PTAFR	5724	0.5802	0.0903	platelet-activating factor receptor								PTAFR	0.5802
1283	LLGL2	3993	0.5802	0.0309	lethal giant larvae homolog 2 (Drosophila)								LLGL2	0.5802
1284	ILK	3611	0.5802	0.1283	integrin-linked kinase								ILK	0.5802
1285	CLDN19	149461	0.5801	0.1555	claudin 19								CLDN19	0.5801
1286	AXL	558	0.58	0.0798	AXL receptor tyrosine kinase								AXL	0.58
1287	LEF1	51176	0.58	0.0132	lymphoid enhancer-binding factor 1								LEF1	0.58
1288	HPD	3242	0.5799	0.0133	4-hydroxyphenylpyruvate dioxygenase								HPD	0.5799
1289	C10ORF71	118461	0.5799	0.0868	chromosome 10 open reading frame 71								C10ORF71	0.5799
1290	ADAMTS7	11173	0.5798	0.0933	ADAM metallopeptidase with thrombospondin type 1 motif, 7								ADAMTS7	0.5798
1291	2022-09-06	23157	0.5796	0.0445	septin 6								2022-09-06	0.5796
1292	GSX1	219409	0.5796	0.021	GS homeobox 1								GSX1	0.5796
1293	NR2F6	2063	0.5793	0.11	nuclear receptor subfamily 2, group F, member 6								NR2F6	0.5793
1294	C6ORF223	221416	0.5791	0.0316	chromosome 6 open reading frame 223								C6ORF223	0.5791
1295	IL28B	282617	0.579	0	interleukin 28B (interferon, lambda 3)								IL28B	0.579
1296	SLC5A9	200010	0.579	0.0161	solute carrier family 5 (sodium/glucose cotransporter), member 9								SLC5A9	0.579
1297	AMN	81693	0.5789	0.0573	amnionless homolog (mouse)								AMN	0.5789
1298	ETS1	2113	0.5788	0.0553	v-ets erythroblastosis virus E26 oncogene homolog 1 (avian)								ETS1	0.5788
1299	TNFAIP2	7127	0.5786	0.082	tumor necrosis factor, alpha-induced protein 2								TNFAIP2	0.5786
1300	LOC100130285	100130285	0.5786	0	uncharacterized LOC100130285								LOC100130285	0.5786
1301	MED15	51586	0.5783	0.1293	mediator complex subunit 15								MED15	0.5783
1302	BEST2	54831	0.5778	0.1337	bestrophin 2								BEST2	0.5778
1303	ATXN2L	11273	0.5775	0.1076	ataxin 2-like								ATXN2L	0.5775
1304	SAPCD1	401251	0.5775	0.0461	suppressor APC domain containing 1								SAPCD1	0.5775
1305	FOXF1	2294	0.5774	0.0236	forkhead box F1								FOXF1	0.5774
1306	P2RY6	5031	0.577	0.0501	pyrimidinergic receptor P2Y, G-protein coupled, 6								P2RY6	0.577
1307	PHLDA3	23612	0.5769	0.0697	pleckstrin homology-like domain, family A, member 3								PHLDA3	0.5769
1308	ADCK4	79934	0.5765	0.086	aarF domain containing kinase 4								ADCK4	0.5765
1309	MOGS	7841	0.5765	0.1055	mannosyl-oligosaccharide glucosidase								MOGS	0.5765
1310	SMARCB1	6598	0.5765	0.1203	SWI/SNF related, matrix associated, actin dependent regulator of chromatin, subfamily b, member 1								SMARCB1	0.5765
1311	P4HB	5034	0.5765	0.1369	prolyl 4-hydroxylase, beta polypeptide								P4HB	0.5765
1312	PFKL	5211	0.5764	0.134	phosphofructokinase, liver								PFKL	0.5764
1313	VENTX	27287	0.5764	0.0904	VENT homeobox								VENTX	0.5764
1314	OXER1	165140	0.5764	0.1323	oxoeicosanoid (OXE) receptor 1								OXER1	0.5764
1315	YIPF2	78992	0.5759	0.1475	Yip1 domain family, member 2								YIPF2	0.5759
1316	TTLL3	26140	0.5758	0.0898	tubulin tyrosine ligase-like family, member 3								TTLL3	0.5758
1317	GP9	2815	0.5757	0.1522	glycoprotein IX (platelet)								GP9	0.5757
1318	SPIB	6689	0.5755	0.056	Spi-B transcription factor (Spi-1/PU.1 related)								SPIB	0.5755
1319	EPS8L2	64787	0.5754	0.0372	EPS8-like 2								EPS8L2	0.5754
1320	WIZ	58525	0.5754	0.1524	widely interspaced zinc finger motifs								WIZ	0.5754
1321	MAP3K6	9064	0.5751	0.0848	mitogen-activated protein kinase kinase kinase 6								MAP3K6	0.5751
1322	SPOCD1	90853	0.575	0.0463	SPOC domain containing 1								SPOCD1	0.575
1323	LRRC71	149499	0.575	0.048	leucine rich repeat containing 71								LRRC71	0.575
1324	ALG12	79087	0.5749	0.0941	asparagine-linked glycosylation 12, alpha-1,6-mannosyltransferase homolog (S. cerevisiae)								ALG12	0.5749
1325	OPLAH	26873	0.5748	0.0475	5-oxoprolinase (ATP-hydrolysing)								OPLAH	0.5748
1326	TOP3B	8940	0.5747	0.0476	topoisomerase (DNA) III beta								TOP3B	0.5747
1327	TAF6L	10629	0.5747	0.079	TAF6-like RNA polymerase II, p300/CBP-associated factor (PCAF)-associated factor, 65kDa								TAF6L	0.5747
1328	SLC29A2	3177	0.5746	0.058	solute carrier family 29 (nucleoside transporters), member 2								SLC29A2	0.5746
1329	MON1B	22879	0.5744	0.0362	MON1 homolog B (yeast)								MON1B	0.5744
1330	FAM64A	54478	0.5743	0.0833	family with sequence similarity 64, member A								FAM64A	0.5743
1331	TRAF3IP3	80342	0.5742	0.0481	TRAF3 interacting protein 3								TRAF3IP3	0.5742
1332	VAV1	7409	0.5742	0.0614	vav 1 guanine nucleotide exchange factor								VAV1	0.5742
1333	ENGASE	64772	0.5741	0.0884	endo-beta-N-acetylglucosaminidase								ENGASE	0.5741
1334	XPNPEP2	7512	0.574	0.161	X-prolyl aminopeptidase (aminopeptidase P) 2, membrane-bound								XPNPEP2	0.574
1335	APOBEC3D	140564	0.574	0.0259	apolipoprotein B mRNA editing enzyme, catalytic polypeptide-like 3D								APOBEC3D	0.574
1336	SLC1A7	6512	0.5738	0.1323	solute carrier family 1 (glutamate transporter), member 7								SLC1A7	0.5738
1337	MPV17L2	84769	0.5737	0.0823	MPV17 mitochondrial membrane protein-like 2								MPV17L2	0.5737
1338	NECAP2	55707	0.5737	0.106	NECAP endocytosis associated 2								NECAP2	0.5737
1339	A1CF	29974	0.5736	0.064	APOBEC1 complementation factor								A1CF	0.5736
1340	C20ORF201	198437	0.5736	0.088	chromosome 20 open reading frame 201								C20ORF201	0.5736
1341	TMEM30B	161291	0.5736	0.0263	transmembrane protein 30B								TMEM30B	0.5736
1342	NOC4L	79050	0.5736	0.1129	nucleolar complex associated 4 homolog (S. cerevisiae)								NOC4L	0.5736
1343	ZBTB17	7709	0.5735	0.1164	zinc finger and BTB domain containing 17								ZBTB17	0.5735
1344	CNPPD1	27013	0.5735	0.0664	cyclin Pas1/PHO80 domain containing 1								CNPPD1	0.5735
1345	HIST1H2BH	8345	0.5734	0.0124	histone cluster 1, H2bh								HIST1H2BH	0.5734
1346	NFKBID	84807	0.5732	0.032	nuclear factor of kappa light polypeptide gene enhancer in B-cells inhibitor, delta								NFKBID	0.5732
1347	PLIN2	123	0.5732	0.0204	perilipin 2								PLIN2	0.5732
1348	UBASH3A	53347	0.5731	0.0385	ubiquitin associated and SH3 domain containing A								UBASH3A	0.5731
1349	CSF3R	1441	0.5731	0.0945	colony stimulating factor 3 receptor (granulocyte)								CSF3R	0.5731
1350	KLK11	11012	0.5731	0.0676	kallikrein-related peptidase 11								KLK11	0.5731
1351	PRR14	78994	0.5731	0.1064	proline rich 14								PRR14	0.5731
1352	WDR90	197335	0.5731	0.0821	WD repeat domain 90								WDR90	0.5731
1353	LINC00313	114038	0.5731	0.0253	long intergenic non-protein coding RNA 313								LINC00313	0.5731
1354	CC2D1A	54862	0.573	0.1387	coiled-coil and C2 domain containing 1A								CC2D1A	0.573
1355	MARCO	8685	0.5725	0.0529	macrophage receptor with collagenous structure								MARCO	0.5725
1356	MAMDC4	158056	0.5725	0.0456	MAM domain containing 4								MAMDC4	0.5725
1357	ERCC2	2068	0.5723	0.0982	excision repair cross-complementing rodent repair deficiency, complementation group 2								ERCC2	0.5723
1358	HFE	3077	0.5722	0.069	hemochromatosis								HFE	0.5722
1359	HIST1H1D	3007	0.572	0.0212	histone cluster 1, H1d								HIST1H1D	0.572
1360	TMEM88	92162	0.572	0.0584	transmembrane protein 88								TMEM88	0.572
1361	LIF	3976	0.5717	0.0494	leukemia inhibitory factor								LIF	0.5717
1362	CYTH4	27128	0.5717	0.1307	cytohesin 4								CYTH4	0.5717
1363	GGN	199720	0.5717	0.1399	gametogenetin								GGN	0.5717
1364	TBC1D10B	26000	0.5717	0.091	TBC1 domain family, member 10B								TBC1D10B	0.5717
1365	CDC42EP1	11135	0.5717	0.0815	CDC42 effector protein (Rho GTPase binding) 1								CDC42EP1	0.5717
1366	ARAP3	64411	0.5716	0.0326	ArfGAP with RhoGAP domain, ankyrin repeat and PH domain 3								ARAP3	0.5716
1367	TARBP2	6895	0.5715	0.1086	TAR (HIV-1) RNA binding protein 2								TARBP2	0.5715
1368	GFER	2671	0.5715	0.1075	growth factor, augmenter of liver regeneration								GFER	0.5715
1369	CDKN1A	1026	0.5714	0.085	cyclin-dependent kinase inhibitor 1A (p21, Cip1)								CDKN1A	0.5714
1370	C16ORF48	84080	0.5711	0.0484	chromosome 16 open reading frame 48								C16ORF48	0.5711
1371	TMEM190	147744	0.571	0.0953	transmembrane protein 190								TMEM190	0.571
1372	C20ORF27	54976	0.5706	0.1166	chromosome 20 open reading frame 27								C20ORF27	0.5706
1373	DENND2D	79961	0.5705	0.0418	DENN/MADD domain containing 2D								DENND2D	0.5705
1374	TAP1	6890	0.5705	0.0868	transporter 1, ATP-binding cassette, sub-family B (MDR/TAP)								TAP1	0.5705
1375	SH3BP2	6452	0.5705	0.0793	SH3-domain binding protein 2								SH3BP2	0.5705
1376	C1QTNF6	114904	0.5705	0.0434	C1q and tumor necrosis factor related protein 6								C1QTNF6	0.5705
1377	LYN	4067	0.5704	0.0741	v-yes-1 Yamaguchi sarcoma viral related oncogene homolog								LYN	0.5704
1378	LOC728431	728431	0.5704	0.0331	uncharacterized LOC728431								LOC728431	0.5704
1379	MYO7B	4648	0.5702	0.0337	myosin VIIB								MYO7B	0.5702
1380	HNF4A	3172	0.5702	0.238	hepatocyte nuclear factor 4, alpha								HNF4A	0.5702
1381	FOXE3	2301	0.5702	0.0885	forkhead box E3								FOXE3	0.5702
1382	ELANE	1991	0.5702	0.0363	elastase, neutrophil expressed								ELANE	0.5702
1383	WFIKKN1	117166	0.5702	0.1123	WAP, follistatin/kazal, immunoglobulin, kunitz and netrin domain containing 1								WFIKKN1	0.5702
1384	OSGIN1	29948	0.5701	0.1384	oxidative stress induced growth inhibitor 1								OSGIN1	0.5701
1385	RCSD1	92241	0.5701	0.0456	RCSD domain containing 1								RCSD1	0.5701
1386	ATP6V1B1	525	0.5698	0.0156	ATPase, H+ transporting, lysosomal 56/58kDa, V1 subunit B1								ATP6V1B1	0.5698
1387	IL28RA	163702	0.5698	0.0093	interleukin 28 receptor, alpha (interferon, lambda receptor)								IL28RA	0.5698
1388	CD33	945	0.5695	0.085	CD33 molecule								CD33	0.5695
1389	URM1	81605	0.5694	0.121	ubiquitin related modifier 1								URM1	0.5694
1390	SESN2	83667	0.5691	0.0401	sestrin 2								SESN2	0.5691
1391	RHOT2	89941	0.569	0.1579	ras homolog family member T2								RHOT2	0.569
1392	DMWD	1762	0.569	0.2334	dystrophia myotonica, WD repeat containing								DMWD	0.569
1393	PLD4	122618	0.569	0.0324	phospholipase D family, member 4								PLD4	0.569
1394	PBX4	80714	0.5689	0.0205	pre-B-cell leukemia homeobox 4								PBX4	0.5689
1395	IGF2BP2	10644	0.5689	0.0112	insulin-like growth factor 2 mRNA binding protein 2								IGF2BP2	0.5689
1396	LIMS2	55679	0.5686	0.1302	LIM and senescent cell antigen-like domains 2								LIMS2	0.5686
1397	HGFAC	3083	0.5685	0.1472	HGF activator								HGFAC	0.5685
1398	KANK2	25959	0.5684	0.0618	KN motif and ankyrin repeat domains 2								KANK2	0.5684
1399	CD79B	974	0.5684	0.061	CD79b molecule, immunoglobulin-associated beta								CD79B	0.5684
1400	YBX2	51087	0.568	0.1337	Y box binding protein 2								YBX2	0.568
1401	SLC44A2	57153	0.5679	0.084	solute carrier family 44, member 2								SLC44A2	0.5679
1402	IRF2BP1	26145	0.5679	0.1203	interferon regulatory factor 2 binding protein 1								IRF2BP1	0.5679
1403	PEX16	9409	0.5677	0.1403	peroxisomal biogenesis factor 16								PEX16	0.5677
1404	HSD17B8	7923	0.5677	0.0657	hydroxysteroid (17-beta) dehydrogenase 8								HSD17B8	0.5677
1405	ARFGAP1	55738	0.5677	0.1392	ADP-ribosylation factor GTPase activating protein 1								ARFGAP1	0.5677
1406	PTDSS2	81490	0.5674	0.0909	phosphatidylserine synthase 2								PTDSS2	0.5674
1407	BAIAP2L1	55971	0.5674	0.0213	BAI1-associated protein 2-like 1								BAIAP2L1	0.5674
1408	CLDN5	7122	0.5673	0.0957	claudin 5								CLDN5	0.5673
1409	KLF14	136259	0.5673	0.1331	Kruppel-like factor 14								KLF14	0.5673
1410	GNA15	2769	0.567	0.0534	guanine nucleotide binding protein (G protein), alpha 15 (Gq class)								GNA15	0.567
1411	ATP8B3	148229	0.567	0.0772	ATPase, aminophospholipid transporter, class I, type 8B, member 3								ATP8B3	0.567
1412	NOTCH1	4851	0.5668	0.042	notch 1								NOTCH1	0.5668
1413	MICALL2	79778	0.5667	0.0575	MICAL-like 2								MICALL2	0.5667
1414	SLC2A9	56606	0.5666	0.0471	solute carrier family 2 (facilitated glucose transporter), member 9								SLC2A9	0.5666
1415	HIST1H2AL	8332	0.5665	0.0174	histone cluster 1, H2al								HIST1H2AL	0.5665
1416	CACNA2D4	93589	0.5665	0.0308	calcium channel, voltage-dependent, alpha 2/delta subunit 4								CACNA2D4	0.5665
1417	ZSCAN10	84891	0.5665	0.095	zinc finger and SCAN domain containing 10								ZSCAN10	0.5665
1418	METRN	79006	0.5664	0.0975	meteorin, glial cell differentiation regulator								METRN	0.5664
1419	DUSP23	54935	0.5664	0.049	dual specificity phosphatase 23								DUSP23	0.5664
1420	CCDC71L	168455	0.5664	0.0291	coiled-coil domain containing 71-like								CCDC71L	0.5664
1421	RAB3D	9545	0.5663	0.0532	RAB3D, member RAS oncogene family								RAB3D	0.5663
1422	ZNF408	79797	0.5662	0.1053	zinc finger protein 408								ZNF408	0.5662
1423	LRRC32	2615	0.5659	0.1022	leucine rich repeat containing 32								LRRC32	0.5659
1424	PRAM1	84106	0.5659	0.0775	PML-RARA regulated adaptor molecule 1								PRAM1	0.5659
1425	RIPK3	11035	0.5659	0.0517	receptor-interacting serine-threonine kinase 3								RIPK3	0.5659
1426	CD300C	10871	0.5659	0.0854	CD300c molecule								CD300C	0.5659
1427	GZMK	3003	0.5658	0.0628	granzyme K (granzyme 3; tryptase II)								GZMK	0.5658
1428	SEMA4B	10509	0.5657	0.0512	sema domain, immunoglobulin domain (Ig), transmembrane domain (TM) and short cytoplasmic domain, (semaphorin) 4B								SEMA4B	0.5657
1429	COL6A1	1291	0.5654	0.1326	collagen, type VI, alpha 1								COL6A1	0.5654
1430	TFF2	7032	0.5654	0.0811	trefoil factor 2								TFF2	0.5654
1431	UBTF	7343	0.5652	0.1233	upstream binding transcription factor, RNA polymerase I								UBTF	0.5652
1432	C1ORF85	112770	0.5649	0.0934	chromosome 1 open reading frame 85								C1ORF85	0.5649
1433	GIPR	2696	0.5649	0.203	gastric inhibitory polypeptide receptor								GIPR	0.5649
1434	OTX1	5013	0.5648	0.0841	orthodenticle homeobox 1								OTX1	0.5648
1435	MUC5B	727897	0.5646	0.1018	mucin 5B, oligomeric mucus/gel-forming								MUC5B	0.5646
1436	MYO18B	84700	0.5645	0.0099	myosin XVIIIB								MYO18B	0.5645
1437	TRBV7-8	28590	0.5643	0	T cell receptor beta variable 7-8								TRBV7-8	0.5643
1438	CAPN10	11132	0.5642	0.0967	calpain 10								CAPN10	0.5642
1439	PRDM12	59335	0.5639	0.1018	PR domain containing 12								PRDM12	0.5639
1440	CC2D1B	200014	0.5638	0.0485	coiled-coil and C2 domain containing 1B								CC2D1B	0.5638
1441	APOBR	55911	0.5638	0.0811	apolipoprotein B receptor								APOBR	0.5638
1442	CCDC69	26112	0.5638	0.0417	coiled-coil domain containing 69								CCDC69	0.5638
1443	IL17C	27189	0.5635	0.15	interleukin 17C								IL17C	0.5635
1444	CCR2	729230	0.5635	0.0706	chemokine (C-C motif) receptor 2								CCR2	0.5635
1445	FOXL1	2300	0.5633	0.1185	forkhead box L1								FOXL1	0.5633
1446	SLC39A13	91252	0.5632	0.1004	solute carrier family 39 (zinc transporter), member 13								SLC39A13	0.5632
1447	CD72	971	0.5631	0.0434	CD72 molecule								CD72	0.5631
1448	PRSS22	64063	0.5626	0.1063	protease, serine, 22								PRSS22	0.5626
1449	IQGAP3	128239	0.5621	0.0472	IQ motif containing GTPase activating protein 3								IQGAP3	0.5621
1450	LOC729173	729173	0.5621	0	uncharacterized LOC729173								LOC729173	0.5621
1451	VAMP8	8673	0.562	0.0938	vesicle-associated membrane protein 8 (endobrevin)								VAMP8	0.562
1452	ARSA	410	0.5619	0.1538	arylsulfatase A								ARSA	0.5619
1453	SMARCD1	6602	0.5616	0.0999	SWI/SNF related, matrix associated, actin dependent regulator of chromatin, subfamily d, member 1								SMARCD1	0.5616
1454	FLOT2	2319	0.5616	0.1154	flotillin 2								FLOT2	0.5616
1455	FAM65C	140876	0.5615	0.0098	family with sequence similarity 65, member C								FAM65C	0.5615
1456	ERGIC3	51614	0.5614	0.1331	ERGIC and golgi 3								ERGIC3	0.5614
1457	FAM214B	80256	0.5612	0.1536	family with sequence similarity 214, member B								FAM214B	0.5612
1458	KIAA2013	90231	0.5612	0.0498	KIAA2013								KIAA2013	0.5612
1459	MUC16	94025	0.5611	0.0099	mucin 16, cell surface associated								MUC16	0.5611
1460	JMJD4	65094	0.561	0.0921	jumonji domain containing 4								JMJD4	0.561
1461	FAM89B	23625	0.5609	0.124	family with sequence similarity 89, member B								FAM89B	0.5609
1462	PDGFB	5155	0.5605	0.139	platelet-derived growth factor beta polypeptide								PDGFB	0.5605
1463	PUSL1	126789	0.5605	0.1054	pseudouridylate synthase-like 1								PUSL1	0.5605
1464	TADA3	10474	0.5605	0.1123	transcriptional adaptor 3								TADA3	0.5605
1465	SLC25A35	399512	0.5604	0.0377	solute carrier family 25, member 35								SLC25A35	0.5604
1466	B4GALT1	2683	0.5602	0.0524	UDP-Gal:betaGlcNAc beta 1,4- galactosyltransferase, polypeptide 1								B4GALT1	0.5602
1467	HOXC12	3228	0.5601	0.0382	homeobox C12								HOXC12	0.5601
1468	ZBED3	84327	0.56	0.0226	zinc finger, BED-type containing 3								ZBED3	0.56
1469	MTMR14	64419	0.5599	0.0848	myotubularin related protein 14								MTMR14	0.5599
1470	P2RX2	22953	0.5599	0.2485	purinergic receptor P2X, ligand-gated ion channel, 2								P2RX2	0.5599
1471	ZFHX3	463	0.5598	0.0505	zinc finger homeobox 3								ZFHX3	0.5598
1472	ACIN1	22985	0.5596	0.1007	apoptotic chromatin condensation inducer 1								ACIN1	0.5596
1473	CLK3	1198	0.5595	0.0534	CDC-like kinase 3								CLK3	0.5595
1474	EXD3	54932	0.5593	0.0537	exonuclease 3'-5' domain containing 3								EXD3	0.5593
1475	NOD2	64127	0.5592	0.0405	nucleotide-binding oligomerization domain containing 2								NOD2	0.5592
1476	RNASEH2A	10535	0.559	0.1711	ribonuclease H2, subunit A								RNASEH2A	0.559
1477	RNF213	57674	0.5588	0.0824	ring finger protein 213								RNF213	0.5588
1478	TCL1A	8115	0.5587	0.073	T-cell leukemia/lymphoma 1A								TCL1A	0.5587
1479	MVD	4597	0.5586	0.1044	mevalonate (diphospho) decarboxylase								MVD	0.5586
1480	ACY3	91703	0.5583	0.0481	aspartoacylase (aminocyclase) 3								ACY3	0.5583
1481	FRMD1	79981	0.5583	0.1736	FERM domain containing 1								FRMD1	0.5583
1482	HBM	3042	0.558	0.029	hemoglobin, mu								HBM	0.558
1483	TBX3	6926	0.5579	0.0222	T-box 3								TBX3	0.5579
1484	EDA	1896	0.5577	0.1919	ectodysplasin A								EDA	0.5577
1485	PTGDR2	11251	0.5577	0.1416	prostaglandin D2 receptor 2								PTGDR2	0.5577
1486	UPF1	5976	0.5575	0.0996	UPF1 regulator of nonsense transcripts homolog (yeast)								UPF1	0.5575
1487	KIF2C	11004	0.5575	0.1263	kinesin family member 2C								KIF2C	0.5575
1488	HOXB13	10481	0.5575	0.0917	homeobox B13								HOXB13	0.5575
1489	ISOC2	79763	0.5573	0.1213	isochorismatase domain containing 2								ISOC2	0.5573
1490	GIPC1	10755	0.5573	0.1157	GIPC PDZ domain containing family, member 1								GIPC1	0.5573
1491	MGC23270	196872	0.5572	0.0485	uncharacterized LOC196872								MGC23270	0.5572
1492	CSDA	8531	0.5569	0.0242	cold shock domain protein A								CSDA	0.5569
1493	NME6	10201	0.5568	0.0396	NME/NM23 nucleoside diphosphate kinase 6								NME6	0.5568
1494	TBX6	6911	0.5567	0.2197	T-box 6								TBX6	0.5567
1495	GATA3	2625	0.5567	0.0093	GATA binding protein 3								GATA3	0.5567
1496	GPR114	221188	0.5567	0.0373	G protein-coupled receptor 114								GPR114	0.5567
1497	FAM181B	220382	0.5567	0.0575	family with sequence similarity 181, member B								FAM181B	0.5567
1498	CAV3	859	0.5566	0.1829	caveolin 3								CAV3	0.5566
1499	FAM83F	113828	0.5566	0.0425	family with sequence similarity 83, member F								FAM83F	0.5566
1500	MFSD10	10227	0.5565	0.1117	major facilitator superfamily domain containing 10								MFSD10	0.5565
1501	TRPT1	83707	0.5564	0.0873	tRNA phosphotransferase 1								TRPT1	0.5564
1502	CEACAM4	1089	0.5562	0.0821	carcinoembryonic antigen-related cell adhesion molecule 4								CEACAM4	0.5562
1503	SLC44A4	80736	0.5561	0.0276	solute carrier family 44, member 4								SLC44A4	0.5561
1504	ASB10	136371	0.5561	0.1716	ankyrin repeat and SOCS box containing 10								ASB10	0.5561
1505	AANAT	15	0.5559	0.083	aralkylamine N-acetyltransferase								AANAT	0.5559
1506	SPSB4	92369	0.5557	0.0999	splA/ryanodine receptor domain and SOCS box containing 4								SPSB4	0.5557
1507	TERT	7015	0.5556	0.1613	telomerase reverse transcriptase								TERT	0.5556
1508	TNNI3	7137	0.5555	0.0438	troponin I type 3 (cardiac)								TNNI3	0.5555
1509	SULT2B1	6820	0.5555	0.1068	sulfotransferase family, cytosolic, 2B, member 1								SULT2B1	0.5555
1510	F2	2147	0.5554	0.1166	coagulation factor II (thrombin)								F2	0.5554
1511	GAL3ST4	79690	0.5554	0.0253	galactose-3-O-sulfotransferase 4								GAL3ST4	0.5554
1512	UFSP1	402682	0.5553	0.089	UFM1-specific peptidase 1 (non-functional)								UFSP1	0.5553
1513	DKKL1	27120	0.5552	0.1363	dickkopf-like 1								DKKL1	0.5552
1514	CSNK1G2-AS1	255193	0.5552	0.1593	CSNK1G2 antisense RNA 1 (non-protein coding)								CSNK1G2-AS1	0.5552
1515	YDJC	150223	0.5552	0.1205	YdjC homolog (bacterial)								YDJC	0.5552
1516	NCR1	9437	0.5551	0.2214	natural cytotoxicity triggering receptor 1								NCR1	0.5551
1517	HK3	3101	0.5551	0.1064	hexokinase 3 (white cell)								HK3	0.5551
1518	DDX54	79039	0.5551	0.1237	DEAD (Asp-Glu-Ala-Asp) box polypeptide 54								DDX54	0.5551
1519	S1PR3	1903	0.5548	0.0267	sphingosine-1-phosphate receptor 3								S1PR3	0.5548
1520	SCNN1A	6337	0.5546	0.0823	sodium channel, non-voltage-gated 1 alpha subunit								SCNN1A	0.5546
1521	TSKS	60385	0.5546	0.1601	testis-specific serine kinase substrate								TSKS	0.5546
1522	EFNA2	1943	0.5544	0.1065	ephrin-A2								EFNA2	0.5544
1523	SHMT1	6470	0.5543	0.0772	serine hydroxymethyltransferase 1 (soluble)								SHMT1	0.5543
1524	FBLIM1	54751	0.5542	0.0783	filamin binding LIM protein 1								FBLIM1	0.5542
1525	TBKBP1	9755	0.5541	0.1747	TBK1 binding protein 1								TBKBP1	0.5541
1526	MTA1	9112	0.554	0.1115	metastasis associated 1								MTA1	0.554
1527	CHMP6	79643	0.5538	0.1247	charged multivesicular body protein 6								CHMP6	0.5538
1528	C16ORF74	404550	0.5537	0.0291	chromosome 16 open reading frame 74								C16ORF74	0.5537
1529	ARHGAP9	64333	0.5536	0.077	Rho GTPase activating protein 9								ARHGAP9	0.5536
1530	XRCC3	7517	0.5536	0.1145	X-ray repair complementing defective repair in Chinese hamster cells 3								XRCC3	0.5536
1531	RNF151	146310	0.5535	0.0831	ring finger protein 151								RNF151	0.5535
1532	ARMC6	93436	0.5535	0.1686	armadillo repeat containing 6								ARMC6	0.5535
1533	SAMD11	148398	0.5535	0.0533	sterile alpha motif domain containing 11								SAMD11	0.5535
1534	FASTK	10922	0.5535	0.1281	Fas-activated serine/threonine kinase								FASTK	0.5535
1535	MED26	9441	0.5532	0.0293	mediator complex subunit 26								MED26	0.5532
1536	CD19	930	0.5531	0.054	CD19 molecule								CD19	0.5531
1537	CTSD	1509	0.5531	0.155	cathepsin D								CTSD	0.5531
1538	TNFRSF18	8784	0.553	0.049	tumor necrosis factor receptor superfamily, member 18								TNFRSF18	0.553
1539	SART1	9092	0.553	0.1314	squamous cell carcinoma antigen recognized by T cells								SART1	0.553
1540	FAM70B	348013	0.5529	0.0664	family with sequence similarity 70, member B								FAM70B	0.5529
1541	C1QTNF1	114897	0.5529	0.1393	C1q and tumor necrosis factor related protein 1								C1QTNF1	0.5529
1542	SLC39A4	55630	0.5528	0.0495	solute carrier family 39 (zinc transporter), member 4								SLC39A4	0.5528
1543	CCDC33	80125	0.5528	0.2146	coiled-coil domain containing 33								CCDC33	0.5528
1544	NUP188	23511	0.5525	0.1313	nucleoporin 188kDa								NUP188	0.5525
1545	ADRA2B	151	0.5524	0.1918	adrenoceptor alpha 2B								ADRA2B	0.5524
1546	CHD4	1108	0.5523	0.0933	chromodomain helicase DNA binding protein 4								CHD4	0.5523
1547	SP6	80320	0.5523	0.0574	Sp6 transcription factor								SP6	0.5523
1548	GGA1	26088	0.5522	0.0655	golgi-associated, gamma adaptin ear containing, ARF binding protein 1								GGA1	0.5522
1549	RIPK4	54101	0.5521	0.0296	receptor-interacting serine-threonine kinase 4								RIPK4	0.5521
1550	PSMB9	5698	0.552	0.1006	proteasome (prosome, macropain) subunit, beta type, 9 (large multifunctional peptidase 2)								PSMB9	0.552
1551	SLC30A2	7780	0.5519	0.1549	solute carrier family 30 (zinc transporter), member 2								SLC30A2	0.5519
1552	IRX5	10265	0.5519	0.0075	iroquois homeobox 5								IRX5	0.5519
1553	SAPCD2	89958	0.5519	0.0782	suppressor APC domain containing 2								SAPCD2	0.5519
1554	CD52	1043	0.5516	0.0634	CD52 molecule								CD52	0.5516
1555	VARS	7407	0.5514	0.1611	valyl-tRNA synthetase								VARS	0.5514
1556	SLC2A1	6513	0.5514	0.0265	solute carrier family 2 (facilitated glucose transporter), member 1								SLC2A1	0.5514
1557	CDKN2C	1031	0.5514	0.0266	cyclin-dependent kinase inhibitor 2C (p18, inhibits CDK4)								CDKN2C	0.5514
1558	STAG3	10734	0.5512	0.0081	stromal antigen 3								STAG3	0.5512
1559	NMB	4828	0.5511	0.0145	neuromedin B								NMB	0.5511
1560	CTF1	1489	0.5509	0.1114	cardiotrophin 1								CTF1	0.5509
1561	TMEM52	339456	0.5506	0.0311	transmembrane protein 52								TMEM52	0.5506
1562	CKM	1158	0.5504	0.0356	creatine kinase, muscle								CKM	0.5504
1563	DAG1	1605	0.5502	0.0667	dystroglycan 1 (dystrophin-associated glycoprotein 1)								DAG1	0.5502
1564	PLD2	5338	0.5499	0.163	phospholipase D2								PLD2	0.5499
1565	CD3G	917	0.5497	0.0529	CD3g molecule, gamma (CD3-TCR complex)								CD3G	0.5497
1566	C19ORF10	56005	0.5497	0.1393	chromosome 19 open reading frame 10								C19ORF10	0.5497
1567	MRPS24	64951	0.5497	0.0781	mitochondrial ribosomal protein S24								MRPS24	0.5497
1568	BSND	7809	0.5496	0.1464	Bartter syndrome, infantile, with sensorineural deafness (Barttin)								BSND	0.5496
1569	CCND1	595	0.5495	0.0295	cyclin D1								CCND1	0.5495
1570	CBX8	57332	0.5495	0.034	chromobox homolog 8								CBX8	0.5495
1571	ZNF668	79759	0.5494	0.0761	zinc finger protein 668								ZNF668	0.5494
1572	ODF2	4957	0.5494	0.0834	outer dense fiber of sperm tails 2								ODF2	0.5494
1573	RPS19	6223	0.5493	0.085	ribosomal protein S19								RPS19	0.5493
1574	SDF4	51150	0.5493	0.1469	stromal cell derived factor 4								SDF4	0.5493
1575	ECI1	1632	0.5493	0.1128	enoyl-CoA delta isomerase 1								ECI1	0.5493
1576	MKI67	4288	0.5491	0.1229	antigen identified by monoclonal antibody Ki-67								MKI67	0.5491
1577	CYP2S1	29785	0.549	0.0312	cytochrome P450, family 2, subfamily S, polypeptide 1								CYP2S1	0.549
1578	CIC	23152	0.5486	0.1641	capicua homolog (Drosophila)								CIC	0.5486
1579	LOC84931	84931	0.5484	0.098	uncharacterized LOC84931								LOC84931	0.5484
1580	SLC35A2	7355	0.5483	0.0613	solute carrier family 35 (UDP-galactose transporter), member A2								SLC35A2	0.5483
1581	CCL25	6370	0.5483	0.0894	chemokine (C-C motif) ligand 25								CCL25	0.5483
1582	KRT18	3875	0.5478	0.0224	keratin 18								KRT18	0.5478
1583	CDC20	991	0.5478	0.1461	cell division cycle 20 homolog (S. cerevisiae)								CDC20	0.5478
1584	LOXL2	4017	0.5478	0.0833	lysyl oxidase-like 2								LOXL2	0.5478
1585	HPSE	10855	0.5478	0.0338	heparanase								HPSE	0.5478
1586	TNFAIP8	25816	0.5477	0.1067	tumor necrosis factor, alpha-induced protein 8								TNFAIP8	0.5477
1587	TSPO2	222642	0.5476	0.2072	translocator protein 2								TSPO2	0.5476
1588	PHF1	5252	0.5475	0.1342	PHD finger protein 1								PHF1	0.5475
1589	CLEC3B	7123	0.547	0.0817	C-type lectin domain family 3, member B								CLEC3B	0.547
1590	C1ORF200	644997	0.547	0.2308	chromosome 1 open reading frame 200								C1ORF200	0.547
1591	ZNF775	285971	0.5469	0.0744	zinc finger protein 775								ZNF775	0.5469
1592	FBLN1	2192	0.5469	0.1102	fibulin 1								FBLN1	0.5469
1593	POU3F3	5455	0.5468	0.1109	POU class 3 homeobox 3								POU3F3	0.5468
1594	MOB3C	148932	0.5465	0.0663	MOB kinase activator 3C								MOB3C	0.5465
1595	KLK14	43847	0.5465	0.2092	kallikrein-related peptidase 14								KLK14	0.5465
1596	LAMA5	3911	0.5464	0.0575	laminin, alpha 5								LAMA5	0.5464
1597	EPN1	29924	0.5464	0.2196	epsin 1								EPN1	0.5464
1598	DNASE2	1777	0.5464	0.0899	deoxyribonuclease II, lysosomal								DNASE2	0.5464
1599	GPAA1	8733	0.5463	0.1547	glycosylphosphatidylinositol anchor attachment protein 1 homolog (yeast)								GPAA1	0.5463
1600	ST3GAL4	6484	0.5463	0.0552	ST3 beta-galactoside alpha-2,3-sialyltransferase 4								ST3GAL4	0.5463
1601	PRTN3	5657	0.5461	0.0518	proteinase 3								PRTN3	0.5461
1602	GAPDHS	26330	0.5461	0.1127	glyceraldehyde-3-phosphate dehydrogenase, spermatogenic								GAPDHS	0.5461
1603	CIB3	117286	0.5461	0.1171	calcium and integrin binding family member 3								CIB3	0.5461
1604	HJURP	55355	0.546	0.1165	Holliday junction recognition protein								HJURP	0.546
1605	ZNF609	23060	0.546	0.0959	zinc finger protein 609								ZNF609	0.546
1606	PODN	127435	0.5459	0.1022	podocan								PODN	0.5459
1607	PEX6	5190	0.5458	0.0322	peroxisomal biogenesis factor 6								PEX6	0.5458
1608	ADAM8	101	0.5458	0.0966	ADAM metallopeptidase domain 8								ADAM8	0.5458
1609	ITPRIPL1	150771	0.5457	0.0109	inositol 1,4,5-trisphosphate receptor interacting protein-like 1								ITPRIPL1	0.5457
1610	P2RX1	5023	0.5456	0.0996	purinergic receptor P2X, ligand-gated ion channel, 1								P2RX1	0.5456
1611	PITPNM1	9600	0.5456	0.1301	phosphatidylinositol transfer protein, membrane-associated 1								PITPNM1	0.5456
1612	2022-09-09	10801	0.5456	0.0567	septin 9								2022-09-09	0.5456
1613	ZGPAT	84619	0.5454	0.1273	zinc finger, CCCH-type with G patch domain								ZGPAT	0.5454
1614	SYVN1	84447	0.5453	0.0772	synovial apoptosis inhibitor 1, synoviolin								SYVN1	0.5453
1615	SCAMP4	113178	0.5453	0.1198	secretory carrier membrane protein 4								SCAMP4	0.5453
1616	LILRB3	11025	0.5451	0.2042	leukocyte immunoglobulin-like receptor, subfamily B (with TM and ITIM domains), member 3								LILRB3	0.5451
1617	TP73	7161	0.545	0.1839	tumor protein p73								TP73	0.545
1618	PTCD1	26024	0.5448	0.0419	pentatricopeptide repeat domain 1								PTCD1	0.5448
1619	ZNF593	51042	0.5448	0.1349	zinc finger protein 593								ZNF593	0.5448
1620	HLX	3142	0.5447	0.0643	H2.0-like homeobox								HLX	0.5447
1621	TRAF1	7185	0.544	0.0657	TNF receptor-associated factor 1								TRAF1	0.544
1622	SNX8	29886	0.544	0.0895	sorting nexin 8								SNX8	0.544
1623	TCF15	6939	0.5436	0.1238	transcription factor 15 (basic helix-loop-helix)								TCF15	0.5436
1624	SNX20	124460	0.5435	0.0575	sorting nexin 20								SNX20	0.5435
1625	MYBPH	4608	0.5434	0.1807	myosin binding protein H								MYBPH	0.5434
1626	RGL2	5863	0.5433	0.1138	ral guanine nucleotide dissociation stimulator-like 2								RGL2	0.5433
1627	HM13	81502	0.5432	0.1043	histocompatibility (minor) 13								HM13	0.5432
1628	TOP1MT	116447	0.5432	0.064	topoisomerase (DNA) I, mitochondrial								TOP1MT	0.5432
1629	SPDEF	25803	0.5431	0.2237	SAM pointed domain containing ets transcription factor								SPDEF	0.5431
1630	IKBKB	3551	0.5431	0.0936	inhibitor of kappa light polypeptide gene enhancer in B-cells, kinase beta								IKBKB	0.5431
1631	DIAPH1	1729	0.5431	0.0808	diaphanous homolog 1 (Drosophila)								DIAPH1	0.5431
1632	CTRL	1506	0.5431	0.0866	chymotrypsin-like								CTRL	0.5431
1633	SLA2	84174	0.543	0.0666	Src-like-adaptor 2								SLA2	0.543
1634	FLT4	2324	0.5428	0.0907	fms-related tyrosine kinase 4								FLT4	0.5428
1635	HTA	283902	0.5425	0	uncharacterized LOC283902								HTA	0.5425
1636	ARHGEF40	55701	0.5423	0.0605	Rho guanine nucleotide exchange factor (GEF) 40								ARHGEF40	0.5423
1637	RAMP2	10266	0.5423	0.0653	receptor (G protein-coupled) activity modifying protein 2								RAMP2	0.5423
1638	PATL2	197135	0.5423	0.0558	protein associated with topoisomerase II homolog 2 (yeast)								PATL2	0.5423
1639	CBX2	84733	0.5422	0.1177	chromobox homolog 2								CBX2	0.5422
1640	SPR	6697	0.5422	0.0706	sepiapterin reductase (7,8-dihydrobiopterin:NADP+ oxidoreductase)								SPR	0.5422
1641	HHEX	3087	0.5422	0.026	hematopoietically expressed homeobox								HHEX	0.5422
1642	PLA2G4F	255189	0.5421	0.0852	phospholipase A2, group IVF								PLA2G4F	0.5421
1643	PEMT	10400	0.5421	0.1202	phosphatidylethanolamine N-methyltransferase								PEMT	0.5421
1644	C1ORF170	84808	0.542	0.1732	chromosome 1 open reading frame 170								C1ORF170	0.542
1645	CD96	10225	0.542	0.0494	CD96 molecule								CD96	0.542
1646	IRGC	56269	0.5418	0.121	immunity-related GTPase family, cinema								IRGC	0.5418
1647	PRG2	5553	0.5415	0.0235	proteoglycan 2, bone marrow (natural killer cell activator, eosinophil granule major basic protein)								PRG2	0.5415
1648	PRSS55	203074	0.5412	0.0618	protease, serine, 55								PRSS55	0.5412
1649	CASZ1	54897	0.5411	0.091	castor zinc finger 1								CASZ1	0.5411
1650	CIZ1	25792	0.5411	0.147	CDKN1A interacting zinc finger protein 1								CIZ1	0.5411
1651	CREB3L1	90993	0.5409	0.1597	cAMP responsive element binding protein 3-like 1								CREB3L1	0.5409
1652	RHBDD3	25807	0.5407	0.1043	rhomboid domain containing 3								RHBDD3	0.5407
1653	NTN1	9423	0.5406	0.0627	netrin 1								NTN1	0.5406
1654	NPW	283869	0.5406	0.0247	neuropeptide W								NPW	0.5406
1655	KLHDC7B	113730	0.5405	0.0541	kelch domain containing 7B								KLHDC7B	0.5405
1656	TMEM63A	9725	0.5405	0.1227	transmembrane protein 63A								TMEM63A	0.5405
1657	MAP3K10	4294	0.5405	0.2787	mitogen-activated protein kinase kinase kinase 10								MAP3K10	0.5405
1658	FAM110D	79927	0.5404	0.1563	family with sequence similarity 110, member D								FAM110D	0.5404
1659	KANK3	256949	0.5404	0.1446	KN motif and ankyrin repeat domains 3								KANK3	0.5404
1660	FGD2	221472	0.5401	0.0937	FYVE, RhoGEF and PH domain containing 2								FGD2	0.5401
1661	PLK5	126520	0.54	0.1885	polo-like kinase 5								PLK5	0.54
1662	ANGPTL6	83854	0.5399	0.0528	angiopoietin-like 6								ANGPTL6	0.5399
1663	G0S2	50486	0.5399	0.0349	G0/G1switch 2								G0S2	0.5399
1664	GH1	2688	0.5399	0.1685	growth hormone 1								GH1	0.5399
1665	ARID1A	8289	0.5398	0.098	AT rich interactive domain 1A (SWI-like)								ARID1A	0.5398
1666	PPP1R27	116729	0.5397	0.1069	protein phosphatase 1, regulatory subunit 27								PPP1R27	0.5397
1667	CELSR1	9620	0.5396	0.0233	cadherin, EGF LAG seven-pass G-type receptor 1 (flamingo homolog, Drosophila)								CELSR1	0.5396
1668	GDPD5	81544	0.5396	0.1059	glycerophosphodiester phosphodiesterase domain containing 5								GDPD5	0.5396
1669	GNB1L	54584	0.5396	0.099	guanine nucleotide binding protein (G protein), beta polypeptide 1-like								GNB1L	0.5396
1670	AMIGO3	386724	0.5395	0.1039	adhesion molecule with Ig-like domain 3								AMIGO3	0.5395
1671	FMNL3	91010	0.5394	0.0526	formin-like 3								FMNL3	0.5394
1672	LSM2	57819	0.5393	0.1833	LSM2 homolog, U6 small nuclear RNA associated (S. cerevisiae)								LSM2	0.5393
1673	PABPC1L	80336	0.5391	0.043	poly(A) binding protein, cytoplasmic 1-like								PABPC1L	0.5391
1674	TRPC2	7221	0.5391	0.0667	transient receptor potential cation channel, subfamily C, member 2, pseudogene								TRPC2	0.5391
1675	LOC284889	284889	0.5391	0.0216	uncharacterized LOC284889								LOC284889	0.5391
1676	CREB3L2	64764	0.5385	0.0665	cAMP responsive element binding protein 3-like 2								CREB3L2	0.5385
1677	PLXNA3	55558	0.5385	0.082	plexin A3								PLXNA3	0.5385
1678	SH3D20	201175	0.5385	0	SH3 domain containing 20								SH3D20	0.5385
1679	ATXN7L2	127002	0.5384	0.0648	ataxin 7-like 2								ATXN7L2	0.5384
1680	PAX9	5083	0.5384	0.0371	paired box 9								PAX9	0.5384
1681	ZNF683	257101	0.5384	0.0915	zinc finger protein 683								ZNF683	0.5384
1682	TMPRSS6	164656	0.5384	0.2574	transmembrane protease, serine 6								TMPRSS6	0.5384
1683	MSLN	10232	0.5384	0.0248	mesothelin								MSLN	0.5384
1684	HPYR1	93668	0.5381	0.0004	Helicobacter pylori responsive 1 (non-protein coding)								HPYR1	0.5381
1685	ARHGAP27	201176	0.538	0.0727	Rho GTPase activating protein 27								ARHGAP27	0.538
1686	FAM160B2	64760	0.5379	0.1227	family with sequence similarity 160, member B2								FAM160B2	0.5379
1687	CCDC134	79879	0.5378	0.1154	coiled-coil domain containing 134								CCDC134	0.5378
1688	KLHL17	339451	0.5377	0.0857	kelch-like 17 (Drosophila)								KLHL17	0.5377
1689	BMP4	652	0.5376	0.0335	bone morphogenetic protein 4								BMP4	0.5376
1690	SOX17	64321	0.5376	0.0538	SRY (sex determining region Y)-box 17								SOX17	0.5376
1691	ITGB3	3690	0.5376	0.0872	integrin, beta 3 (platelet glycoprotein IIIa, antigen CD61)								ITGB3	0.5376
1692	MFGE8	4240	0.5375	0.0778	milk fat globule-EGF factor 8 protein								MFGE8	0.5375
1693	BRI3	25798	0.5373	0.1101	brain protein I3								BRI3	0.5373
1694	PLIN5	440503	0.537	0.1751	perilipin 5								PLIN5	0.537
1695	GDNF	2668	0.5369	0.0746	glial cell derived neurotrophic factor								GDNF	0.5369
1696	PLAT	5327	0.5367	0.054	plasminogen activator, tissue								PLAT	0.5367
1697	LRRC15	131578	0.5366	0.0796	leucine rich repeat containing 15								LRRC15	0.5366
1698	IER3	8870	0.5365	0.0707	immediate early response 3								IER3	0.5365
1699	ZNF503	84858	0.5365	0.0405	zinc finger protein 503								ZNF503	0.5365
1700	CDCA8	55143	0.5364	0.1382	cell division cycle associated 8								CDCA8	0.5364
1701	CA5BP1	340591	0.5364	0.0993	carbonic anhydrase VB pseudogene 1								CA5BP1	0.5364
1702	NLRP12	91662	0.5364	0.0804	NLR family, pyrin domain containing 12								NLRP12	0.5364
1703	GPR78	27201	0.5364	0.0857	G protein-coupled receptor 78								GPR78	0.5364
1704	PWWP2B	170394	0.5362	0.1379	PWWP domain containing 2B								PWWP2B	0.5362
1705	null	7421	0.5361	0.0438	null								null	0.5361
1706	STAT6	6778	0.536	0.1093	signal transducer and activator of transcription 6, interleukin-4 induced								STAT6	0.536
1707	ELK3	2004	0.536	0.0762	ELK3, ETS-domain protein (SRF accessory protein 2)								ELK3	0.536
1708	PGC	5225	0.536	0.1728	progastricsin (pepsinogen C)								PGC	0.536
1709	DAK	26007	0.5359	0.0876	dihydroxyacetone kinase 2 homolog (S. cerevisiae)								DAK	0.5359
1710	HOXA-AS2	285943	0.5358	0.073	HOXA cluster antisense RNA 2 (non-protein coding)								HOXA-AS2	0.5358
1711	HBBP1	3044	0.5356	0.0455	hemoglobin, beta pseudogene 1								HBBP1	0.5356
1712	JMJD8	339123	0.5356	0.1331	jumonji domain containing 8								JMJD8	0.5356
1713	KBTBD5	131377	0.5354	0.0433	kelch repeat and BTB (POZ) domain containing 5								KBTBD5	0.5354
1714	NPRL3	8131	0.5353	0.1249	nitrogen permease regulator-like 3 (S. cerevisiae)								NPRL3	0.5353
1715	CYTL1	54360	0.5353	0.0172	cytokine-like 1								CYTL1	0.5353
1716	TM4SF5	9032	0.5351	0.1701	transmembrane 4 L six family member 5								TM4SF5	0.5351
1717	CD84	8832	0.5351	0.0923	CD84 molecule								CD84	0.5351
1718	CHST3	9469	0.5349	0.0981	carbohydrate (chondroitin 6) sulfotransferase 3								CHST3	0.5349
1719	NDUFA4L2	56901	0.5348	0.0349	NADH dehydrogenase (ubiquinone) 1 alpha subcomplex, 4-like 2								NDUFA4L2	0.5348
1720	RGL3	57139	0.5347	0.0345	ral guanine nucleotide dissociation stimulator-like 3								RGL3	0.5347
1721	FAM205A	259308	0.5347	0.0813	family with sequence similarity 205, member A								FAM205A	0.5347
1722	ZC3H10	84872	0.5347	0.0219	zinc finger CCCH-type containing 10								ZC3H10	0.5347
1723	COTL1	23406	0.5347	0.1024	coactosin-like 1 (Dictyostelium)								COTL1	0.5347
1724	NCAPH2	29781	0.5344	0.1661	non-SMC condensin II complex, subunit H2								NCAPH2	0.5344
1725	PPARD	5467	0.5343	0.0585	peroxisome proliferator-activated receptor delta								PPARD	0.5343
1726	SGSH	6448	0.5341	0.1075	N-sulfoglucosamine sulfohydrolase								SGSH	0.5341
1727	CHST13	166012	0.534	0.0287	carbohydrate (chondroitin 4) sulfotransferase 13								CHST13	0.534
1728	ATN1	1822	0.534	0.1996	atrophin 1								ATN1	0.534
1729	ANAPC2	29882	0.5338	0.136	anaphase promoting complex subunit 2								ANAPC2	0.5338
1730	GTPBP5	26164	0.5337	0.0609	GTP binding protein 5 (putative)								GTPBP5	0.5337
1731	CTDSP2	10106	0.5337	0.0637	CTD (carboxy-terminal domain, RNA polymerase II, polypeptide A) small phosphatase 2								CTDSP2	0.5337
1732	EMR2	30817	0.5336	0.0546	egf-like module containing, mucin-like, hormone receptor-like 2								EMR2	0.5336
1733	PAFAH2	5051	0.5336	0.0371	platelet-activating factor acetylhydrolase 2, 40kDa								PAFAH2	0.5336
1734	EGFL8	80864	0.5335	0.1114	EGF-like-domain, multiple 8								EGFL8	0.5335
1735	ZNF444	55311	0.5335	0.1668	zinc finger protein 444								ZNF444	0.5335
1736	ODF3L2	284451	0.5334	0.1696	outer dense fiber of sperm tails 3-like 2								ODF3L2	0.5334
1737	MTMR9LP	339483	0.5333	0.0764	myotubularin related protein 9-like, pseudogene								MTMR9LP	0.5333
1738	LTB4R	1241	0.5333	0.0869	leukotriene B4 receptor								LTB4R	0.5333
1739	GRB7	2886	0.5332	0.0587	growth factor receptor-bound protein 7								GRB7	0.5332
1740	AIFM2	84883	0.5332	0.0283	apoptosis-inducing factor, mitochondrion-associated, 2								AIFM2	0.5332
1741	PTGIR	5739	0.533	0.219	prostaglandin I2 (prostacyclin) receptor (IP)								PTGIR	0.533
1742	C10ORF47	254427	0.533	0.0097	chromosome 10 open reading frame 47								C10ORF47	0.533
1743	LOC646808	646808	0.5328	0.0543	L antigen family, member 3 pseudogene								LOC646808	0.5328
1744	FOXL2	668	0.5328	0.0087	forkhead box L2								FOXL2	0.5328
1745	SRM	6723	0.5327	0.1948	spermidine synthase								SRM	0.5327
1746	HIST1H1B	3009	0.5327	0.0661	histone cluster 1, H1b								HIST1H1B	0.5327
1747	MIA	8190	0.5325	0.0339	melanoma inhibitory activity								MIA	0.5325
1748	GATA4	2626	0.5325	0.1566	GATA binding protein 4								GATA4	0.5325
1749	CHCHD5	84269	0.5322	0.1326	coiled-coil-helix-coiled-coil-helix domain containing 5								CHCHD5	0.5322
1750	COL8A2	1296	0.5321	0.0683	collagen, type VIII, alpha 2								COL8A2	0.5321
1751	DHRS3	9249	0.532	0.0527	dehydrogenase/reductase (SDR family) member 3								DHRS3	0.532
1752	RAB11FIP1	80223	0.532	0.0438	RAB11 family interacting protein 1 (class I)								RAB11FIP1	0.532
1753	BTG2	7832	0.532	0.0664	BTG family, member 2								BTG2	0.532
1754	ACE	1636	0.532	0.1029	angiotensin I converting enzyme (peptidyl-dipeptidase A) 1								ACE	0.532
1755	NKX3-1	4824	0.5318	0.1507	NK3 homeobox 1								NKX3-1	0.5318
1756	SYCE2	256126	0.5317	0.0254	synaptonemal complex central element protein 2								SYCE2	0.5317
1757	LMX1B	4010	0.5316	0.1617	LIM homeobox transcription factor 1, beta								LMX1B	0.5316
1758	MRPL4	51073	0.5316	0.1953	mitochondrial ribosomal protein L4								MRPL4	0.5316
1759	LMAN2	10960	0.5316	0.1558	lectin, mannose-binding 2								LMAN2	0.5316
1760	MGAT4B	11282	0.531	0.1216	mannosyl (alpha-1,3-)-glycoprotein beta-1,4-N-acetylglucosaminyltransferase, isozyme B								MGAT4B	0.531
1761	C2ORF81	388963	0.5309	0.1492	chromosome 2 open reading frame 81								C2ORF81	0.5309
1762	VMO1	284013	0.5309	0.0374	vitelline membrane outer layer 1 homolog (chicken)								VMO1	0.5309
1763	ACSF2	80221	0.5309	0.0831	acyl-CoA synthetase family member 2								ACSF2	0.5309
1764	C10ORF114	399726	0.5309	0.0773	chromosome 10 open reading frame 114								C10ORF114	0.5309
1765	MAFF	23764	0.5304	0.0815	v-maf musculoaponeurotic fibrosarcoma oncogene homolog F (avian)								MAFF	0.5304
1766	PTP4A3	11156	0.5304	0.0479	protein tyrosine phosphatase type IVA, member 3								PTP4A3	0.5304
1767	RASGRP4	115727	0.5303	0.0786	RAS guanyl releasing protein 4								RASGRP4	0.5303
1768	BHLHE23	128408	0.5301	0.0417	basic helix-loop-helix family, member e23								BHLHE23	0.5301
1769	RRP1	8568	0.5301	0.1622	ribosomal RNA processing 1 homolog (S. cerevisiae)								RRP1	0.5301
1770	ARFRP1	10139	0.5301	0.1299	ADP-ribosylation factor related protein 1								ARFRP1	0.5301
1771	ZNF496	84838	0.53	0.0529	zinc finger protein 496								ZNF496	0.53
1772	C19ORF33	64073	0.53	0.0268	chromosome 19 open reading frame 33								C19ORF33	0.53
1773	CDC42EP2	10435	0.53	0.1108	CDC42 effector protein (Rho GTPase binding) 2								CDC42EP2	0.53
1774	TSPAN14	81619	0.5298	0.0587	tetraspanin 14								TSPAN14	0.5298
1775	MEN1	4221	0.5298	0.1319	multiple endocrine neoplasia I								MEN1	0.5298
1776	LAD1	3898	0.5297	0.1003	ladinin 1								LAD1	0.5297
1777	MNX1	3110	0.5296	0.0683	motor neuron and pancreas homeobox 1								MNX1	0.5296
1778	FOXB1	27023	0.5296	0.1145	forkhead box B1								FOXB1	0.5296
1779	C19ORF26	255057	0.5295	0.2115	chromosome 19 open reading frame 26								C19ORF26	0.5295
1780	LAIR1	3903	0.5294	0.0969	leukocyte-associated immunoglobulin-like receptor 1								LAIR1	0.5294
1781	RDH5	5959	0.5292	0.0663	retinol dehydrogenase 5 (11-cis/9-cis)								RDH5	0.5292
1782	RGS10	6001	0.5291	0.0576	regulator of G-protein signaling 10								RGS10	0.5291
1783	CDHR2	54825	0.5291	0.1435	cadherin-related family member 2								CDHR2	0.5291
1784	ITGA11	22801	0.5291	0.1406	integrin, alpha 11								ITGA11	0.5291
1785	CLDN23	137075	0.5291	0.0149	claudin 23								CLDN23	0.5291
1786	RRP9	9136	0.529	0.1599	ribosomal RNA processing 9, small subunit (SSU) processome component, homolog (yeast)								RRP9	0.529
1787	DUS1L	64118	0.5289	0.1703	dihydrouridine synthase 1-like (S. cerevisiae)								DUS1L	0.5289
1788	MED16	10025	0.5289	0.1715	mediator complex subunit 16								MED16	0.5289
1789	CTU1	90353	0.5288	0.0004	cytosolic thiouridylase subunit 1 homolog (S. pombe)								CTU1	0.5288
1790	NME3	4832	0.5288	0.1192	NME/NM23 nucleoside diphosphate kinase 3								NME3	0.5288
1791	HS3ST6	64711	0.5286	0.1089	heparan sulfate (glucosamine) 3-O-sulfotransferase 6								HS3ST6	0.5286
1792	HOXB1	3211	0.5285	0.2089	homeobox B1								HOXB1	0.5285
1793	SSTR4	6754	0.5284	0.1671	somatostatin receptor 4								SSTR4	0.5284
1794	FMNL1	752	0.5281	0.1558	formin-like 1								FMNL1	0.5281
1795	CD68	968	0.528	0.1006	CD68 molecule								CD68	0.528
1796	PACSIN3	29763	0.528	0.0808	protein kinase C and casein kinase substrate in neurons 3								PACSIN3	0.528
1797	FBL	2091	0.5279	0.1962	fibrillarin								FBL	0.5279
1798	PFKFB4	5210	0.5277	0.0465	6-phosphofructo-2-kinase/fructose-2,6-biphosphatase 4								PFKFB4	0.5277
1799	RAMP3	10268	0.5276	0.0832	receptor (G protein-coupled) activity modifying protein 3								RAMP3	0.5276
1800	MAN2C1	4123	0.5273	0.1192	mannosidase, alpha, class 2C, member 1								MAN2C1	0.5273
1801	MLPH	79083	0.5271	0.0425	melanophilin								MLPH	0.5271
1802	TMEM161A	54929	0.527	0.1429	transmembrane protein 161A								TMEM161A	0.527
1803	CENPA	1058	0.5269	0.1307	centromere protein A								CENPA	0.5269
1804	PSPN	5623	0.5268	0.1474	persephin								PSPN	0.5268
1805	LONP1	9361	0.5267	0.154	lon peptidase 1, mitochondrial								LONP1	0.5267
1806	LOC644794	644794	0.5267	0	uncharacterized LOC644794								LOC644794	0.5267
1807	CCDC64B	146439	0.5266	0.0889	coiled-coil domain containing 64B								CCDC64B	0.5266
1808	PPP1R16A	84988	0.5265	0.0878	protein phosphatase 1, regulatory subunit 16A								PPP1R16A	0.5265
1809	C9ORF89	84270	0.5263	0.07	chromosome 9 open reading frame 89								C9ORF89	0.5263
1810	ZNF385A	25946	0.5263	0.1137	zinc finger protein 385A								ZNF385A	0.5263
1811	CRTC1	23373	0.5263	0.2874	CREB regulated transcription coactivator 1								CRTC1	0.5263
1812	GIMAP5	55340	0.5258	0.094	GTPase, IMAP family member 5								GIMAP5	0.5258
1813	ISL2	64843	0.5257	0.0068	ISL LIM homeobox 2								ISL2	0.5257
1814	MOGAT3	346606	0.5257	0.0445	monoacylglycerol O-acyltransferase 3								MOGAT3	0.5257
1815	ACTN4	81	0.5257	0.1289	actinin, alpha 4								ACTN4	0.5257
1816	NTN3	4917	0.5256	0.1488	netrin 3								NTN3	0.5256
1817	PPP1R3B	79660	0.5256	0.0395	protein phosphatase 1, regulatory subunit 3B								PPP1R3B	0.5256
1818	DKFZP434K028	26070	0.5254	0.1318	uncharacterized LOC26070								DKFZP434K028	0.5254
1819	HOXA11-AS	221883	0.5254	0.0366	HOXA11 antisense RNA (non-protein coding)								HOXA11-AS	0.5254
1820	PCP2	126006	0.5254	0.0499	Purkinje cell protein 2								PCP2	0.5254
1821	PLAC4	191585	0.5253	0.2326	placenta-specific 4								PLAC4	0.5253
1822	ZBTB22	9278	0.5251	0.1367	zinc finger and BTB domain containing 22								ZBTB22	0.5251
1823	POLDIP3	84271	0.5249	0.1105	polymerase (DNA-directed), delta interacting protein 3								POLDIP3	0.5249
1824	FGF22	27006	0.5246	0.032	fibroblast growth factor 22								FGF22	0.5246
1825	GNLY	10578	0.5246	0.0479	granulysin								GNLY	0.5246
1826	WDR18	57418	0.5244	0.1781	WD repeat domain 18								WDR18	0.5244
1827	DPEP3	64180	0.5242	0.1348	dipeptidase 3								DPEP3	0.5242
1828	ABCC6	368	0.5241	0.1072	ATP-binding cassette, sub-family C (CFTR/MRP), member 6								ABCC6	0.5241
1829	TPGS1	91978	0.524	0.09	tubulin polyglutamylase complex subunit 1								TPGS1	0.524
1830	ZFYVE19	84936	0.524	0.0848	zinc finger, FYVE domain containing 19								ZFYVE19	0.524
1831	GIMAP1	170575	0.5239	0.0722	GTPase, IMAP family member 1								GIMAP1	0.5239
1832	SYS1	90196	0.5238	0.0513	SYS1 Golgi-localized integral membrane protein homolog (S. cerevisiae)								SYS1	0.5238
1833	TIGD5	84948	0.5238	0.1196	tigger transposable element derived 5								TIGD5	0.5238
1834	KRT7	3855	0.5238	0.0372	keratin 7								KRT7	0.5238
1835	WNT7B	7477	0.5237	0.1758	wingless-type MMTV integration site family, member 7B								WNT7B	0.5237
1836	RPL3L	6123	0.5235	0.0593	ribosomal protein L3-like								RPL3L	0.5235
1837	TNFRSF13C	115650	0.5235	0.1171	tumor necrosis factor receptor superfamily, member 13C								TNFRSF13C	0.5235
1838	C9ORF173	441476	0.5235	0.1484	chromosome 9 open reading frame 173								C9ORF173	0.5235
1839	NSUN5	55695	0.5235	0.1305	NOP2/Sun domain family, member 5								NSUN5	0.5235
1840	C20ORF195	79025	0.5233	0.0797	chromosome 20 open reading frame 195								C20ORF195	0.5233
1841	ATP5D	513	0.5233	0.1894	ATP synthase, H+ transporting, mitochondrial F1 complex, delta subunit								ATP5D	0.5233
1842	ZSCAN22	342945	0.5233	0.0156	zinc finger and SCAN domain containing 22								ZSCAN22	0.5233
1843	DHX58	79132	0.5232	0.0903	DEXH (Asp-Glu-X-His) box polypeptide 58								DHX58	0.5232
1844	GADD45GIP1	90480	0.5232	0.1618	growth arrest and DNA-damage-inducible, gamma interacting protein 1								GADD45GIP1	0.5232
1845	AGFG2	3268	0.5232	0.077	ArfGAP with FG repeats 2								AGFG2	0.5232
1846	POFUT2	23275	0.5232	0.1201	protein O-fucosyltransferase 2								POFUT2	0.5232
1847	CSF2	1437	0.5231	0.079	colony stimulating factor 2 (granulocyte-macrophage)								CSF2	0.5231
1848	LENG9	94059	0.523	0.0747	leukocyte receptor cluster (LRC) member 9								LENG9	0.523
1849	TREX2	11219	0.523	0.1105	three prime repair exonuclease 2								TREX2	0.523
1850	TRAFD1	10906	0.523	0.0693	TRAF-type zinc finger domain containing 1								TRAFD1	0.523
1851	TNK1	8711	0.5229	0.1724	tyrosine kinase, non-receptor, 1								TNK1	0.5229
1852	TTYH3	80727	0.5228	0.1177	tweety homolog 3 (Drosophila)								TTYH3	0.5228
1853	MSH5	4439	0.5228	0.0742	mutS homolog 5 (E. coli)								MSH5	0.5228
1854	STAP2	55620	0.5228	0.0432	signal transducing adaptor family member 2								STAP2	0.5228
1855	UCP3	7352	0.5225	0.2191	uncoupling protein 3 (mitochondrial, proton carrier)								UCP3	0.5225
1856	DUSP18	150290	0.5225	0.0609	dual specificity phosphatase 18								DUSP18	0.5225
1857	MIB2	142678	0.5225	0.1242	mindbomb E3 ubiquitin protein ligase 2								MIB2	0.5225
1858	RPL19	6143	0.5224	0.0686	ribosomal protein L19								RPL19	0.5224
1859	POMC	5443	0.5224	0.1396	proopiomelanocortin								POMC	0.5224
1860	SSBP4	170463	0.5221	0.1134	single stranded DNA binding protein 4								SSBP4	0.5221
1861	APCDD1L	164284	0.5219	0.0684	adenomatosis polyposis coli down-regulated 1-like								APCDD1L	0.5219
1862	PLAC9	219348	0.5219	0.0778	placenta-specific 9								PLAC9	0.5219
1863	CACNG1	786	0.5217	0.1946	calcium channel, voltage-dependent, gamma subunit 1								CACNG1	0.5217
1864	FAM100A	124402	0.5217	0.1186	family with sequence similarity 100, member A								FAM100A	0.5217
1865	FCRLA	84824	0.5216	0.0316	Fc receptor-like A								FCRLA	0.5216
1866	SREBF1	6720	0.5216	0.063	sterol regulatory element binding transcription factor 1								SREBF1	0.5216
1867	CCS	9973	0.5215	0.1202	copper chaperone for superoxide dismutase								CCS	0.5215
1868	GIGYF1	64599	0.5215	0.1431	GRB10 interacting GYF protein 1								GIGYF1	0.5215
1869	KCNK17	89822	0.5214	0.0287	potassium channel, subfamily K, member 17								KCNK17	0.5214
1870	G6PC3	92579	0.5214	0.1435	glucose 6 phosphatase, catalytic, 3								G6PC3	0.5214
1871	PQLC2	54896	0.5214	0.0661	PQ loop repeat containing 2								PQLC2	0.5214
1872	C9ORF163	158055	0.5211	0.1637	chromosome 9 open reading frame 163								C9ORF163	0.5211
1873	2022-09-12	124404	0.5211	0.161	septin 12								2022-09-12	0.5211
1874	ACVRL1	94	0.5211	0.1636	activin A receptor type II-like 1								ACVRL1	0.5211
1875	ATOH8	84913	0.5211	0.0648	atonal homolog 8 (Drosophila)								ATOH8	0.5211
1876	TMEM37	140738	0.521	0.051	transmembrane protein 37								TMEM37	0.521
1877	SLC38A3	10991	0.521	0.1778	solute carrier family 38, member 3								SLC38A3	0.521
1878	IDUA	3425	0.521	0.1534	iduronidase, alpha-L-								IDUA	0.521
1879	DPEP2	64174	0.5207	0.0878	dipeptidase 2								DPEP2	0.5207
1880	C10ORF54	64115	0.5207	0.1318	chromosome 10 open reading frame 54								C10ORF54	0.5207
1881	TCL1B	9623	0.5205	0.1041	T-cell leukemia/lymphoma 1B								TCL1B	0.5205
1882	C20ORF20	55257	0.5205	0.1063	chromosome 20 open reading frame 20								C20ORF20	0.5205
1883	HNRNPF	3185	0.5205	0.1788	heterogeneous nuclear ribonucleoprotein F								HNRNPF	0.5205
1884	BBC3	27113	0.5204	0.1602	BCL2 binding component 3								BBC3	0.5204
1885	SEC61A1	29927	0.5202	0.1523	Sec61 alpha 1 subunit (S. cerevisiae)								SEC61A1	0.5202
1886	PPAN	56342	0.5201	0.1433	peter pan homolog (Drosophila)								PPAN	0.5201
1887	SERPINB6	5269	0.5201	0.1001	serpin peptidase inhibitor, clade B (ovalbumin), member 6								SERPINB6	0.5201
1888	MEPCE	56257	0.52	0.1205	methylphosphate capping enzyme								MEPCE	0.52
1889	F11R	50848	0.5198	0.0513	F11 receptor								F11R	0.5198
1890	INPP5D	3635	0.5198	0.0906	inositol polyphosphate-5-phosphatase, 145kDa								INPP5D	0.5198
1891	PREB	10113	0.5198	0.1701	prolactin regulatory element binding								PREB	0.5198
1892	GGTLC1	92086	0.5197	0.0268	gamma-glutamyltransferase light chain 1								GGTLC1	0.5197
1893	RORC	6097	0.5197	0.1134	RAR-related orphan receptor C								RORC	0.5197
1894	MYOD1	4654	0.5197	0.2171	myogenic differentiation 1								MYOD1	0.5197
1895	MGC16121	84848	0.5196	0.0213	uncharacterized protein MGC16121								MGC16121	0.5196
1896	CABP2	51475	0.5196	0.1992	calcium binding protein 2								CABP2	0.5196
1897	SMPDL3B	27293	0.5196	0.0746	sphingomyelin phosphodiesterase, acid-like 3B								SMPDL3B	0.5196
1898	TLX2	3196	0.5195	0.1988	T-cell leukemia homeobox 2								TLX2	0.5195
1899	CARD9	64170	0.5194	0.0488	caspase recruitment domain family, member 9								CARD9	0.5194
1900	KRT19	3880	0.5193	0.0284	keratin 19								KRT19	0.5193
1901	GMPR	2766	0.5192	0.0243	guanosine monophosphate reductase								GMPR	0.5192
1902	ZNF276	92822	0.5191	0.1021	zinc finger protein 276								ZNF276	0.5191
1903	TMEM104	54868	0.5191	0.093	transmembrane protein 104								TMEM104	0.5191
1904	FDXR	2232	0.5191	0.0645	ferredoxin reductase								FDXR	0.5191
1905	EFCAB4A	283229	0.5191	0.0439	EF-hand calcium binding domain 4A								EFCAB4A	0.5191
1906	PCYT2	5833	0.5189	0.1367	phosphate cytidylyltransferase 2, ethanolamine								PCYT2	0.5189
1907	CD8B	926	0.5188	0.0572	CD8b molecule								CD8B	0.5188
1908	FAM83E	54854	0.5188	0.1059	family with sequence similarity 83, member E								FAM83E	0.5188
1909	FCN3	8547	0.5185	0.0861	ficolin (collagen/fibrinogen domain containing) 3 (Hakata antigen)								FCN3	0.5185
1910	MESP2	145873	0.5184	0.2372	mesoderm posterior 2 homolog (mouse)								MESP2	0.5184
1911	TMEM105	284186	0.5184	0.1837	transmembrane protein 105								TMEM105	0.5184
1912	IL22RA1	58985	0.5181	0.0598	interleukin 22 receptor, alpha 1								IL22RA1	0.5181
1913	DRD4	1815	0.5179	0.1349	dopamine receptor D4								DRD4	0.5179
1914	APOBEC3F	200316	0.5178	0.0294	apolipoprotein B mRNA editing enzyme, catalytic polypeptide-like 3F								APOBEC3F	0.5178
1915	ERGIC1	57222	0.5177	0.0661	endoplasmic reticulum-golgi intermediate compartment (ERGIC) 1								ERGIC1	0.5177
1916	USHBP1	83878	0.5176	0.1331	Usher syndrome 1C binding protein 1								USHBP1	0.5176
1917	RBPMS	11030	0.5175	0.0551	RNA binding protein with multiple splicing								RBPMS	0.5175
1918	CAMP	820	0.5174	0.0399	cathelicidin antimicrobial peptide								CAMP	0.5174
1919	VGLL4	9686	0.5173	0.0716	vestigial like 4 (Drosophila)								VGLL4	0.5173
1920	POM121L12	285877	0.5173	0.2055	POM121 transmembrane nucleoporin-like 12								POM121L12	0.5173
1921	CALR	811	0.5169	0.0836	calreticulin								CALR	0.5169
1922	GPR124	25960	0.5169	0.1119	G protein-coupled receptor 124								GPR124	0.5169
1923	EPS8L3	79574	0.5169	0.1062	EPS8-like 3								EPS8L3	0.5169
1924	TRAPPC6A	79090	0.5165	0.1121	trafficking protein particle complex 6A								TRAPPC6A	0.5165
1925	H2AFJ	55766	0.5165	0.0243	H2A histone family, member J								H2AFJ	0.5165
1926	E2F7	144455	0.5165	0.0855	E2F transcription factor 7								E2F7	0.5165
1927	ZG16B	124220	0.5165	0.0233	zymogen granule protein 16 homolog B (rat)								ZG16B	0.5165
1928	RNF40	9810	0.5164	0.1691	ring finger protein 40, E3 ubiquitin protein ligase								RNF40	0.5164
1929	TNFRSF10B	8795	0.5164	0.0566	tumor necrosis factor receptor superfamily, member 10b								TNFRSF10B	0.5164
1930	RXRA	6256	0.5164	0.1052	retinoid X receptor, alpha								RXRA	0.5164
1931	LHX3	8022	0.5163	0.2185	LIM homeobox 3								LHX3	0.5163
1932	NR1I2	8856	0.5161	0.2106	nuclear receptor subfamily 1, group I, member 2								NR1I2	0.5161
1933	EXOC3L1	283849	0.5158	0.1049	exocyst complex component 3-like 1								EXOC3L1	0.5158
1934	MYLK2	85366	0.5158	0.156	myosin light chain kinase 2								MYLK2	0.5158
1935	BLOC1S3	388552	0.5156	0.0426	biogenesis of lysosomal organelles complex-1, subunit 3								BLOC1S3	0.5156
1936	ZNF335	63925	0.5156	0.1778	zinc finger protein 335								ZNF335	0.5156
1937	TMEM185B	79134	0.5154	0.0891	transmembrane protein 185B								TMEM185B	0.5154
1938	C16ORF71	146562	0.5153	0.1984	chromosome 16 open reading frame 71								C16ORF71	0.5153
1939	DYRK1B	9149	0.5151	0.2107	dual-specificity tyrosine-(Y)-phosphorylation regulated kinase 1B								DYRK1B	0.5151
1940	POLL	27343	0.5151	0.1808	polymerase (DNA directed), lambda								POLL	0.5151
1941	GCDH	2639	0.5151	0.1465	glutaryl-CoA dehydrogenase								GCDH	0.5151
1942	WISP2	8839	0.515	0.1259	WNT1 inducible signaling pathway protein 2								WISP2	0.515
1943	C2CD4B	388125	0.515	0.1165	C2 calcium-dependent domain containing 4B								C2CD4B	0.515
1944	OMP	4975	0.5149	0.0995	olfactory marker protein								OMP	0.5149
1945	LCN2	3934	0.5149	0.0354	lipocalin 2								LCN2	0.5149
1946	PYCRL	65263	0.5147	0.1267	pyrroline-5-carboxylate reductase-like								PYCRL	0.5147
1947	APOC2	344	0.5147	0.0663	apolipoprotein C-II								APOC2	0.5147
1948	SIRT7	51547	0.5146	0.0948	sirtuin 7								SIRT7	0.5146
1949	TMPO-AS1	100128191	0.5145	0	TMPO antisense RNA 1 (non-protein coding)								TMPO-AS1	0.5145
1950	OSTALPHA	200931	0.5144	0.0159	organic solute transporter alpha								OSTALPHA	0.5144
1951	ABHD1	84696	0.5142	0.0448	abhydrolase domain containing 1								ABHD1	0.5142
1952	RNF216	54476	0.5142	0.0851	ring finger protein 216								RNF216	0.5142
1953	FGD5	152273	0.5142	0.0619	FYVE, RhoGEF and PH domain containing 5								FGD5	0.5142
1954	ZBTB48	3104	0.5141	0.1331	zinc finger and BTB domain containing 48								ZBTB48	0.5141
1955	AMBP	259	0.514	0.0431	alpha-1-microglobulin/bikunin precursor								AMBP	0.514
1956	CARM1	10498	0.514	0.1571	coactivator-associated arginine methyltransferase 1								CARM1	0.514
1957	SMG9	56006	0.5138	0.1267	smg-9 homolog, nonsense mediated mRNA decay factor (C. elegans)								SMG9	0.5138
1958	COL4A1	1282	0.5138	0.0853	collagen, type IV, alpha 1								COL4A1	0.5138
1959	LBX1	10660	0.5138	0.1514	ladybird homeobox 1								LBX1	0.5138
1960	LAPTM5	7805	0.5136	0.1112	lysosomal protein transmembrane 5								LAPTM5	0.5136
1961	IGF2BP1	10642	0.5136	0.0721	insulin-like growth factor 2 mRNA binding protein 1								IGF2BP1	0.5136
1962	TMC4	147798	0.5134	0.0634	transmembrane channel-like 4								TMC4	0.5134
1963	HSPA12B	116835	0.5133	0.1485	heat shock 70kD protein 12B								HSPA12B	0.5133
1964	GALR3	8484	0.5132	0.1738	galanin receptor 3								GALR3	0.5132
1965	METTL7B	196410	0.5132	0.0194	methyltransferase like 7B								METTL7B	0.5132
1966	SEC14L4	284904	0.513	0.0473	SEC14-like 4 (S. cerevisiae)								SEC14L4	0.513
1967	B4GALT2	8704	0.513	0.1348	UDP-Gal:betaGlcNAc beta 1,4- galactosyltransferase, polypeptide 2								B4GALT2	0.513
1968	ATRIP	84126	0.513	0.1364	ATR interacting protein								ATRIP	0.513
1969	SLAMF9	89886	0.5128	0.1388	SLAM family member 9								SLAMF9	0.5128
1970	GLTSCR2	29997	0.5127	0.1174	glioma tumor suppressor candidate region gene 2								GLTSCR2	0.5127
1971	TNFSF14	8740	0.5126	0.0883	tumor necrosis factor (ligand) superfamily, member 14								TNFSF14	0.5126
1972	PLCB2	5330	0.5125	0.1637	phospholipase C, beta 2								PLCB2	0.5125
1973	NLRP6	171389	0.5124	0.0212	NLR family, pyrin domain containing 6								NLRP6	0.5124
1974	AQP5	362	0.5123	0.1866	aquaporin 5								AQP5	0.5123
1975	IGSF9	57549	0.5122	0.0699	immunoglobulin superfamily, member 9								IGSF9	0.5122
1976	GGT6	124975	0.5121	0.0274	gamma-glutamyltransferase 6								GGT6	0.5121
1977	MEX3D	399664	0.5121	0.0398	mex-3 homolog D (C. elegans)								MEX3D	0.5121
1978	CASP14	23581	0.512	0.018	caspase 14, apoptosis-related cysteine peptidase								CASP14	0.512
1979	SYMPK	8189	0.5119	0.158	symplekin								SYMPK	0.5119
1980	TPM2	7169	0.5119	0.0743	tropomyosin 2 (beta)								TPM2	0.5119
1981	WNT9B	7484	0.5116	0.1053	wingless-type MMTV integration site family, member 9B								WNT9B	0.5116
1982	TGFBR2	7048	0.5116	0.1426	transforming growth factor, beta receptor II (70/80kDa)								TGFBR2	0.5116
1983	SERPINA4	5267	0.5115	0.2053	serpin peptidase inhibitor, clade A (alpha-1 antiproteinase, antitrypsin), member 4								SERPINA4	0.5115
1984	PPM1G	5496	0.5112	0.2234	protein phosphatase, Mg2+/Mn2+ dependent, 1G								PPM1G	0.5112
1985	KIF26A	26153	0.511	0.0493	kinesin family member 26A								KIF26A	0.511
1986	ZFPL1	7542	0.511	0.147	zinc finger protein-like 1								ZFPL1	0.511
1987	RILP	83547	0.5107	0.1743	Rab interacting lysosomal protein								RILP	0.5107
1988	GAS2L2	246176	0.5107	0.1865	growth arrest-specific 2 like 2								GAS2L2	0.5107
1989	SLC6A8	6535	0.5107	0.0572	solute carrier family 6 (neurotransmitter transporter, creatine), member 8								SLC6A8	0.5107
1990	POLRMT	5442	0.5106	0.1649	polymerase (RNA) mitochondrial (DNA directed)								POLRMT	0.5106
1991	FUT7	2529	0.5106	0.2149	fucosyltransferase 7 (alpha (1,3) fucosyltransferase)								FUT7	0.5106
1992	ZNFX1	57169	0.5106	0.1466	zinc finger, NFX1-type containing 1								ZNFX1	0.5106
1993	LOC100132707	100132707	0.5106	0	uncharacterized LOC100132707								LOC100132707	0.5106
1994	COL1A1	1277	0.5105	0.1016	collagen, type I, alpha 1								COL1A1	0.5105
1995	KCNK13	56659	0.5102	0.0289	potassium channel, subfamily K, member 13								KCNK13	0.5102
[truncated: 15,983 more rows]

## Sheet: TGM1
Query genes:
Query Gene	Entrez ID	Coexpression Score	P-Value	Description
TGM1	7051	-3.2	0.0029	transglutaminase 1 (K polypeptide epidermal type I, protein-glutamine-gamma-glutamyltransferase)
Coexpressed genes:
Rank	Gene	Entrez ID	Coexpression Score	P-Value	Description
1	SPATA3	130560	1.0774	0	spermatogenesis associated 3								SPATA3	1.0774
2	ADAMTS13	11093	1.0705	0	ADAM metallopeptidase with thrombospondin type 1 motif, 13								ADAMTS13	1.0705
3	TNXB	7148	1.0537	0.0005	tenascin XB								TNXB	1.0537
4	PDCD1	5133	1.0508	0.0003	programmed cell death 1								PDCD1	1.0508
5	C6ORF132	647024	1.0457	0.0001	chromosome 6 open reading frame 132								C6ORF132	1.0457
6	COL7A1	1294	1.0423	0.0001	collagen, type VII, alpha 1								COL7A1	1.0423
7	C11ORF86	254439	1.0326	0.0003	chromosome 11 open reading frame 86								C11ORF86	1.0326
8	ZGLP1	100125288	1.0155	0	zinc finger, GATA-like protein 1								ZGLP1	1.0155
9	KCP	375616	1.0154	0.0002	kielin/chordin-like protein								KCP	1.0154
10	CARD14	79092	1.0119	0.001	caspase recruitment domain family, member 14								CARD14	1.0119
11	LOC100287177	100287177	1.0065	0.0018	uncharacterized LOC100287177								LOC100287177	1.0065
12	ADAM8	101	0.994	0.0009	ADAM metallopeptidase domain 8								ADAM8	0.994
13	CABP2	51475	0.9925	0	calcium binding protein 2								CABP2	0.9925
14	NYX	60506	0.9857	0.0117	nyctalopin								NYX	0.9857
15	HMCN2	256158	0.9785	0.0037	hemicentin 2								HMCN2	0.9785
16	SLC22A7	10864	0.9766	0.0054	solute carrier family 22 (organic anion transporter), member 7								SLC22A7	0.9766
17	SLC26A1	10861	0.9747	0.005	solute carrier family 26 (sulfate transporter), member 1								SLC26A1	0.9747
18	MATN4	8785	0.9734	0	matrilin 4								MATN4	0.9734
19	TMEM184A	202915	0.973	0.0062	transmembrane protein 184A								TMEM184A	0.973
20	SSPO	23145	0.9693	0.0011	SCO-spondin homolog (Bos taurus)								SSPO	0.9693
21	SARDH	1757	0.9678	0.0016	sarcosine dehydrogenase								SARDH	0.9678
22	ERN2	10595	0.9668	0.0004	endoplasmic reticulum to nucleus signaling 2								ERN2	0.9668
23	NOXO1	124056	0.9653	0.0002	NADPH oxidase organizer 1								NOXO1	0.9653
24	FGF3	2248	0.9632	0.0001	fibroblast growth factor 3								FGF3	0.9632
25	SCNN1D	6339	0.963	0.0003	sodium channel, non-voltage-gated 1, delta subunit								SCNN1D	0.963
26	TRIM31	11074	0.9612	0.0009	tripartite motif containing 31								TRIM31	0.9612
27	MUC3A	4584	0.96	0.0745	mucin 3A, cell surface associated								MUC3A	0.96
28	CDH15	1013	0.9576	0.009	cadherin 15, type 1, M-cadherin (myotubule)								CDH15	0.9576
29	ADM2	79924	0.9572	0.0056	adrenomedullin 2								ADM2	0.9572
30	TNFSF14	8740	0.9571	0.0003	tumor necrosis factor (ligand) superfamily, member 14								TNFSF14	0.9571
31	HGC6.3	100128124	0.9559	0.0053	uncharacterized LOC100128124								HGC6.3	0.9559
32	ITGA2B	3674	0.9556	0.0008	integrin, alpha 2b (platelet glycoprotein IIb of IIb/IIIa complex, antigen CD41)								ITGA2B	0.9556
33	CELA2B	51032	0.9538	0.0008	chymotrypsin-like elastase family, member 2B								CELA2B	0.9538
34	ALPI	248	0.953	0.0021	alkaline phosphatase, intestinal								ALPI	0.953
35	KLK9	284366	0.9498	0.0045	kallikrein-related peptidase 9								KLK9	0.9498
36	FUT7	2529	0.9492	0.0045	fucosyltransferase 7 (alpha (1,3) fucosyltransferase)								FUT7	0.9492
37	NR2E3	10002	0.9492	0.0018	nuclear receptor subfamily 2, group E, member 3								NR2E3	0.9492
38	C14ORF180	400258	0.9488	0.0253	chromosome 14 open reading frame 180								C14ORF180	0.9488
39	PLEKHN1	84069	0.9465	0.0086	pleckstrin homology domain containing, family N member 1								PLEKHN1	0.9465
40	COL11A2	1302	0.9465	0.0309	collagen, type XI, alpha 2								COL11A2	0.9465
41	FUT2	2524	0.9444	0.0001	fucosyltransferase 2 (secretor status included)								FUT2	0.9444
42	KREMEN2	79412	0.9431	0.0005	kringle containing transmembrane protein 2								KREMEN2	0.9431
43	FAM3D	131177	0.9404	0.0013	family with sequence similarity 3, member D								FAM3D	0.9404
44	ZBP1	81030	0.9402	0.0038	Z-DNA binding protein 1								ZBP1	0.9402
45	PPY2	23614	0.9391	0	pancreatic polypeptide 2								PPY2	0.9391
46	MGC4294	79160	0.9388	0.0004	uncharacterized MGC4294								MGC4294	0.9388
47	PLCH2	9651	0.9359	0.0013	phospholipase C, eta 2								PLCH2	0.9359
48	MYBPC3	4607	0.9356	0.0219	myosin binding protein C, cardiac								MYBPC3	0.9356
49	LOC283663	283663	0.9353	0.0016	uncharacterized LOC283663								LOC283663	0.9353
50	FLJ41350	399806	0.9338	0.0048	uncharacterized LOC399806								FLJ41350	0.9338
51	FTCD	10841	0.9306	0.0073	formiminotransferase cyclodeaminase								FTCD	0.9306
52	FGF17	8822	0.9288	0.0001	fibroblast growth factor 17								FGF17	0.9288
53	IGFALS	3483	0.9266	0.0224	insulin-like growth factor binding protein, acid labile subunit								IGFALS	0.9266
54	SSC5D	284297	0.9262	0.0102	scavenger receptor cysteine rich domain containing (5 domains)								SSC5D	0.9262
55	IHH	3549	0.9258	0.0601	Indian hedgehog								IHH	0.9258
56	CLDN9	9080	0.9242	0.0079	claudin 9								CLDN9	0.9242
57	GRK1	6011	0.9242	0.0029	G protein-coupled receptor kinase 1								GRK1	0.9242
58	FKBP6	8468	0.9224	0.0012	FK506 binding protein 6, 36kDa								FKBP6	0.9224
59	HNF1A	6927	0.9209	0.0089	HNF1 homeobox A								HNF1A	0.9209
60	CTAG2	30848	0.9193	0.0003	cancer/testis antigen 2								CTAG2	0.9193
61	RETN	56729	0.919	0.0005	resistin								RETN	0.919
62	KCNH6	81033	0.9189	0.0105	potassium voltage-gated channel, subfamily H (eag-related), member 6								KCNH6	0.9189
63	WDR90	197335	0.9186	0.0058	WD repeat domain 90								WDR90	0.9186
64	CRYBB3	1417	0.9175	0.0095	crystallin, beta B3								CRYBB3	0.9175
65	VSX1	30813	0.9174	0.0035	visual system homeobox 1								VSX1	0.9174
66	AQP6	363	0.9164	0.0384	aquaporin 6, kidney specific								AQP6	0.9164
67	LOC100216545	100216545	0.9157	0	uncharacterized LOC100216545								LOC100216545	0.9157
68	UCN	7349	0.9153	0.0014	urocortin								UCN	0.9153
69	ADRA2B	151	0.9152	0.0013	adrenoceptor alpha 2B								ADRA2B	0.9152
70	ADAMTSL2	9719	0.9148	0.0031	ADAMTS-like 2								ADAMTSL2	0.9148
71	PSPN	5623	0.914	0.0004	persephin								PSPN	0.914
72	ETV2	2116	0.9136	0.0052	ets variant 2								ETV2	0.9136
73	LOC100288123	100288123	0.9122	0	uncharacterized LOC100288123								LOC100288123	0.9122
74	NKX2-5	1482	0.9109	0.002	NK2 homeobox 5								NKX2-5	0.9109
75	SRCRB4D	136853	0.9094	0.0045	scavenger receptor cysteine rich domain containing, group B (4 domains)								SRCRB4D	0.9094
76	KLK14	43847	0.9085	0.005	kallikrein-related peptidase 14								KLK14	0.9085
77	IL4I1	259307	0.9078	0.004	interleukin 4 induced 1								IL4I1	0.9078
78	NDOR1	27158	0.9075	0.0383	NADPH dependent diflavin oxidoreductase 1								NDOR1	0.9075
79	PCSK4	54760	0.9074	0.0078	proprotein convertase subtilisin/kexin type 4								PCSK4	0.9074
80	CYP2W1	54905	0.9056	0.0038	cytochrome P450, family 2, subfamily W, polypeptide 1								CYP2W1	0.9056
81	TRABD	80305	0.9055	0.0054	TraB domain containing								TRABD	0.9055
82	SFTPB	6439	0.9055	0.0228	surfactant protein B								SFTPB	0.9055
83	PPP1R2P9	80316	0.9053	0.0012	protein phosphatase 1, regulatory (inhibitor) subunit 2 pseudogene 9								PPP1R2P9	0.9053
84	PRRG2	5639	0.9043	0.0047	proline rich Gla (G-carboxyglutamic acid) 2								PRRG2	0.9043
85	SEC1P	653677	0.9042	0.0272	secretory blood group 1, pseudogene								SEC1P	0.9042
86	TP73	7161	0.9034	0.0042	tumor protein p73								TP73	0.9034
87	OPRD1	4985	0.9033	0.0046	opioid receptor, delta 1								OPRD1	0.9033
88	UCP3	7352	0.9029	0.0162	uncoupling protein 3 (mitochondrial, proton carrier)								UCP3	0.9029
89	CDHR5	53841	0.9009	0.0247	cadherin-related family member 5								CDHR5	0.9009
90	ATP4A	495	0.8994	0.0011	ATPase, H+/K+ exchanging, alpha polypeptide								ATP4A	0.8994
91	EPO	2056	0.8986	0.0129	erythropoietin								EPO	0.8986
92	CASZ1	54897	0.8971	0.0024	castor zinc finger 1								CASZ1	0.8971
93	LOC284661	284661	0.8971	0	uncharacterized LOC284661								LOC284661	0.8971
94	BIRC7	79444	0.8966	0.0025	baculoviral IAP repeat containing 7								BIRC7	0.8966
95	LRCH4	4034	0.8965	0.0395	leucine-rich repeats and calponin homology (CH) domain containing 4								LRCH4	0.8965
96	C21ORF2	755	0.8962	0.0455	chromosome 21 open reading frame 2								C21ORF2	0.8962
97	TTTY14	83869	0.8943	0.007	testis-specific transcript, Y-linked 14 (non-protein coding)								TTTY14	0.8943
98	FOXP3	50943	0.8939	0.0084	forkhead box P3								FOXP3	0.8939
99	RHBDD3	25807	0.8936	0.0044	rhomboid domain containing 3								RHBDD3	0.8936
100	UNC13D	201294	0.8929	0.0108	unc-13 homolog D (C. elegans)								UNC13D	0.8929
101	LOC100128071	100128071	0.8927	0	uncharacterized LOC100128071								LOC100128071	0.8927
102	LOC100130987	100130987	0.8919	0	uncharacterized LOC100130987								LOC100130987	0.8919
103	ELMO3	79767	0.8909	0.0011	engulfment and cell motility 3								ELMO3	0.8909
104	FIBCD1	84929	0.8909	0.0095	fibrinogen C domain containing 1								FIBCD1	0.8909
105	NPFFR1	64106	0.8907	0.004	neuropeptide FF receptor 1								NPFFR1	0.8907
106	DPEP1	1800	0.8907	0.0005	dipeptidase 1 (renal)								DPEP1	0.8907
107	SLC18A3	6572	0.8906	0.0001	solute carrier family 18 (vesicular acetylcholine), member 3								SLC18A3	0.8906
108	PWWP2B	170394	0.8896	0.0138	PWWP domain containing 2B								PWWP2B	0.8896
109	NKX2-8	26257	0.8879	0.0117	NK2 homeobox 8								NKX2-8	0.8879
110	HNF4A	3172	0.8878	0.0702	hepatocyte nuclear factor 4, alpha								HNF4A	0.8878
111	LTB	4050	0.8876	0.0077	lymphotoxin beta (TNF superfamily, member 3)								LTB	0.8876
112	KLK1	3816	0.8875	0.0004	kallikrein 1								KLK1	0.8875
113	TBX1	6899	0.8851	0.012	T-box 1								TBX1	0.8851
114	CEMP1	752014	0.8831	0.0057	cementum protein 1								CEMP1	0.8831
115	ABCA7	10347	0.8819	0.0079	ATP-binding cassette, sub-family A (ABC1), member 7								ABCA7	0.8819
116	NGF	4803	0.8816	0.0055	nerve growth factor (beta polypeptide)								NGF	0.8816
117	PDX1	3651	0.8815	0.0131	pancreatic and duodenal homeobox 1								PDX1	0.8815
118	SLC25A47	283600	0.881	0.0194	solute carrier family 25, member 47								SLC25A47	0.881
119	POU2F2	5452	0.8806	0.0095	POU class 2 homeobox 2								POU2F2	0.8806
120	FUT5	2527	0.8798	0.0049	fucosyltransferase 5 (alpha (1,3) fucosyltransferase)								FUT5	0.8798
121	F2	2147	0.8795	0.0023	coagulation factor II (thrombin)								F2	0.8795
122	CALCA	796	0.8792	0.0211	calcitonin-related polypeptide alpha								CALCA	0.8792
123	TULP1	7287	0.8788	0.0011	tubby like protein 1								TULP1	0.8788
124	LIME1	54923	0.8788	0.0096	Lck interacting transmembrane adaptor 1								LIME1	0.8788
125	ZNF503-AS2	100131213	0.8785	0.066	ZNF503 antisense RNA 2 (non-protein coding)								ZNF503-AS2	0.8785
126	GBX2	2637	0.8773	0.0022	gastrulation brain homeobox 2								GBX2	0.8773
127	FER1L4	80307	0.8773	0.0045	fer-1-like 4 (C. elegans) pseudogene								FER1L4	0.8773
128	FAM83A	84985	0.8773	0.0043	family with sequence similarity 83, member A								FAM83A	0.8773
129	ZAN	7455	0.8769	0.0183	zonadhesin								ZAN	0.8769
130	TBX10	347853	0.8759	0.0193	T-box 10								TBX10	0.8759
131	CRYBB2	1415	0.8756	0.0004	crystallin, beta B2								CRYBB2	0.8756
132	CNGB1	1258	0.8756	0.0733	cyclic nucleotide gated channel beta 1								CNGB1	0.8756
133	LINC00028	140875	0.8739	0.0682	long intergenic non-protein coding RNA 28								LINC00028	0.8739
134	KCNK7	10089	0.8738	0.013	potassium channel, subfamily K, member 7								KCNK7	0.8738
135	TSKS	60385	0.8737	0.0039	testis-specific serine kinase substrate								TSKS	0.8737
136	S1PR4	8698	0.8727	0.0164	sphingosine-1-phosphate receptor 4								S1PR4	0.8727
137	TNFRSF25	8718	0.8724	0.0104	tumor necrosis factor receptor superfamily, member 25								TNFRSF25	0.8724
138	GATA1	2623	0.871	0.0148	GATA binding protein 1 (globin transcription factor 1)								GATA1	0.871
139	TNNI2	7136	0.8705	0.0013	troponin I type 2 (skeletal, fast)								TNNI2	0.8705
140	MYADML2	255275	0.8699	0.0083	myeloid-associated differentiation marker-like 2								MYADML2	0.8699
141	PARP10	84875	0.8694	0.0151	poly (ADP-ribose) polymerase family, member 10								PARP10	0.8694
142	MEGF6	1953	0.8691	0.0041	multiple EGF-like-domains 6								MEGF6	0.8691
143	TCAP	8557	0.8689	0.0063	titin-cap (telethonin)								TCAP	0.8689
144	TPSD1	23430	0.8686	0.031	tryptase delta 1								TPSD1	0.8686
145	FSCN2	25794	0.8669	0.0004	fascin homolog 2, actin-bundling protein, retinal (Strongylocentrotus purpuratus)								FSCN2	0.8669
146	C3ORF27	23434	0.8654	0.0237	chromosome 3 open reading frame 27								C3ORF27	0.8654
147	DHX34	9704	0.8649	0.0121	DEAH (Asp-Glu-Ala-His) box polypeptide 34								DHX34	0.8649
148	ZNF683	257101	0.8641	0.0059	zinc finger protein 683								ZNF683	0.8641
149	CRYAA	1409	0.8638	0.0031	crystallin, alpha A								CRYAA	0.8638
150	CRX	1406	0.8634	0.019	cone-rod homeobox								CRX	0.8634
151	TLE6	79816	0.8631	0.0029	transducin-like enhancer of split 6 (E(sp1) homolog, Drosophila)								TLE6	0.8631
152	NFKBIL1	4795	0.8631	0.0177	nuclear factor of kappa light polypeptide gene enhancer in B-cells inhibitor-like 1								NFKBIL1	0.8631
153	AGER	177	0.8628	0.0166	advanced glycosylation end product-specific receptor								AGER	0.8628
154	GNRH2	2797	0.8627	0.0406	gonadotropin-releasing hormone 2								GNRH2	0.8627
155	OSBPL7	114881	0.8619	0.0107	oxysterol binding protein-like 7								OSBPL7	0.8619
156	C1ORF222	339457	0.8615	0.1699	chromosome 1 open reading frame 222								C1ORF222	0.8615
157	C9ORF50	375759	0.8612	0.0084	chromosome 9 open reading frame 50								C9ORF50	0.8612
158	UPK3B	80761	0.8612	0.0004	uroplakin 3B								UPK3B	0.8612
159	DTX2	113878	0.8609	0.0047	deltex homolog 2 (Drosophila)								DTX2	0.8609
160	CAPS	828	0.8609	0.0121	calcyphosine								CAPS	0.8609
161	PRIC285	85441	0.8606	0.0179	peroxisomal proliferator-activated receptor A interacting complex 285								PRIC285	0.8606
162	BRF1	2972	0.8606	0.0403	BRF1 homolog, subunit of RNA polymerase III transcription initiation factor IIIB (S. cerevisiae)								BRF1	0.8606
163	LTK	4058	0.8605	0.0125	leukocyte receptor tyrosine kinase								LTK	0.8605
164	SOAT2	8435	0.8604	0.0004	sterol O-acyltransferase 2								SOAT2	0.8604
165	SCGB3A1	92304	0.8604	0.0009	secretoglobin, family 3A, member 1								SCGB3A1	0.8604
166	CD79A	973	0.8602	0.013	CD79a molecule, immunoglobulin-associated alpha								CD79A	0.8602
167	GUCA1B	2979	0.8599	0.0085	guanylate cyclase activator 1B (retina)								GUCA1B	0.8599
168	ABHD16B	140701	0.8596	0.0037	abhydrolase domain containing 16B								ABHD16B	0.8596
169	IGF2-AS	51214	0.8595	0.0678	IGF2 antisense RNA (non-protein coding)								IGF2-AS	0.8595
170	LOC151174	151174	0.8594	0.0037	uncharacterized LOC151174								LOC151174	0.8594
171	PTCRA	171558	0.8591	0.0729	pre T-cell antigen receptor alpha								PTCRA	0.8591
172	CLDN18	51208	0.859	0.0241	claudin 18								CLDN18	0.859
173	KLK3	354	0.8588	0.0415	kallikrein-related peptidase 3								KLK3	0.8588
174	ADAD2	161931	0.8576	0.0169	adenosine deaminase domain containing 2								ADAD2	0.8576
175	KIAA1683	80726	0.8568	0.0063	KIAA1683								KIAA1683	0.8568
176	PRX	57716	0.8564	0.0515	periaxin								PRX	0.8564
177	WTIP	126374	0.8559	0.0182	Wilms tumor 1 interacting protein								WTIP	0.8559
178	RBP3	5949	0.8545	0.0326	retinol binding protein 3, interstitial								RBP3	0.8545
179	RHBG	57127	0.8543	0.0178	Rh family, B glycoprotein (gene/pseudogene)								RHBG	0.8543
180	AVPR2	554	0.8542	0.0448	arginine vasopressin receptor 2								AVPR2	0.8542
181	ISM2	145501	0.8538	0.0021	isthmin 2 homolog (zebrafish)								ISM2	0.8538
182	EBF4	57593	0.8529	0.0126	early B-cell factor 4								EBF4	0.8529
183	NPAS1	4861	0.8526	0.0448	neuronal PAS domain protein 1								NPAS1	0.8526
184	S1PR2	9294	0.8521	0.0174	sphingosine-1-phosphate receptor 2								S1PR2	0.8521
185	GP2	2813	0.8506	0.0255	glycoprotein 2 (zymogen granule membrane)								GP2	0.8506
186	ARMC5	79798	0.8503	0.0266	armadillo repeat containing 5								ARMC5	0.8503
187	ZBTB32	27033	0.8494	0.0041	zinc finger and BTB domain containing 32								ZBTB32	0.8494
188	ADAM33	80332	0.8491	0.0136	ADAM metallopeptidase domain 33								ADAM33	0.8491
189	TRIM15	89870	0.8489	0.0369	tripartite motif containing 15								TRIM15	0.8489
190	HSPB9	94086	0.8479	0.0036	heat shock protein, alpha-crystallin-related, B9								HSPB9	0.8479
191	ACAN	176	0.8477	0.0182	aggrecan								ACAN	0.8477
192	ENTPD2	954	0.8473	0.0398	ectonucleoside triphosphate diphosphohydrolase 2								ENTPD2	0.8473
193	C20ORF141	128653	0.8472	0.0204	chromosome 20 open reading frame 141								C20ORF141	0.8472
194	AIM1L	55057	0.8468	0.0039	absent in melanoma 1-like								AIM1L	0.8468
195	SLURP1	57152	0.8463	0.0068	secreted LY6/PLAUR domain containing 1								SLURP1	0.8463
196	AMIGO3	386724	0.8458	0.0068	adhesion molecule with Ig-like domain 3								AMIGO3	0.8458
197	NPEPL1	79716	0.8456	0.0213	aminopeptidase-like 1								NPEPL1	0.8456
198	MAMDC4	158056	0.8453	0.0033	MAM domain containing 4								MAMDC4	0.8453
199	DEGS2	123099	0.845	0.0106	delta(4)-desaturase, sphingolipid 2								DEGS2	0.845
200	FAM109A	144717	0.8449	0.0175	family with sequence similarity 109, member A								FAM109A	0.8449
201	SLC25A34	284723	0.8449	0.0332	solute carrier family 25, member 34								SLC25A34	0.8449
202	CCDC64	92558	0.8444	0.0073	coiled-coil domain containing 64								CCDC64	0.8444
203	APOA4	337	0.8439	0.0208	apolipoprotein A-IV								APOA4	0.8439
204	C1ORF172	126695	0.8429	0.004	chromosome 1 open reading frame 172								C1ORF172	0.8429
205	SMIM1	388588	0.8428	0.0102	small integral membrane protein 1								SMIM1	0.8428
206	SLC6A19	340024	0.8422	0.0261	solute carrier family 6 (neutral amino acid transporter), member 19								SLC6A19	0.8422
207	DUOXA2	405753	0.8411	0.0072	dual oxidase maturation factor 2								DUOXA2	0.8411
208	CACFD1	11094	0.8403	0.0631	calcium channel flower domain containing 1								CACFD1	0.8403
209	MMP11	4320	0.8396	0.0082	matrix metallopeptidase 11 (stromelysin 3)								MMP11	0.8396
210	CBLC	23624	0.8396	0.0035	Cbl proto-oncogene, E3 ubiquitin protein ligase C								CBLC	0.8396
211	CCDC88B	283234	0.8388	0.0206	coiled-coil domain containing 88B								CCDC88B	0.8388
212	RSPH6A	81492	0.8381	0.0578	radial spoke head 6 homolog A (Chlamydomonas)								RSPH6A	0.8381
213	ZNF524	147807	0.8378	0.0397	zinc finger protein 524								ZNF524	0.8378
214	IL13	3596	0.8377	0.0156	interleukin 13								IL13	0.8377
215	CEBPE	1053	0.8373	0.0129	CCAAT/enhancer binding protein (C/EBP), epsilon								CEBPE	0.8373
216	PLIN4	729359	0.8368	0.0258	perilipin 4								PLIN4	0.8368
217	MAPK15	225689	0.8367	0.0432	mitogen-activated protein kinase 15								MAPK15	0.8367
218	MYOG	4656	0.8366	0.0458	myogenin (myogenic factor 4)								MYOG	0.8366
219	NEU4	129807	0.8364	0.0257	sialidase 4								NEU4	0.8364
220	SUV420H2	84787	0.836	0.0334	suppressor of variegation 4-20 homolog 2 (Drosophila)								SUV420H2	0.836
221	CXCR3	2833	0.8359	0.0218	chemokine (C-X-C motif) receptor 3								CXCR3	0.8359
222	SLC22A6	9356	0.8356	0.042	solute carrier family 22 (organic anion transporter), member 6								SLC22A6	0.8356
223	PKD1	5310	0.8355	0.0792	polycystic kidney disease 1 (autosomal dominant)								PKD1	0.8355
224	GDF2	2658	0.8354	0.0522	growth differentiation factor 2								GDF2	0.8354
225	CCDC27	148870	0.8353	0.0032	coiled-coil domain containing 27								CCDC27	0.8353
226	PRLH	51052	0.8349	0.0503	prolactin releasing hormone								PRLH	0.8349
227	SSTR3	6753	0.8344	0.118	somatostatin receptor 3								SSTR3	0.8344
228	TJP3	27134	0.834	0.027	tight junction protein 3								TJP3	0.834
229	KRT16	3868	0.8337	0.0018	keratin 16								KRT16	0.8337
230	ASIC4	55515	0.8334	0.0694	acid-sensing (proton-gated) ion channel family member 4								ASIC4	0.8334
231	ADAMTS10	81794	0.8334	0.0171	ADAM metallopeptidase with thrombospondin type 1 motif, 10								ADAMTS10	0.8334
232	MASP2	10747	0.8331	0.0668	mannan-binding lectin serine peptidase 2								MASP2	0.8331
233	LOC728431	728431	0.8318	0.0018	uncharacterized LOC728431								LOC728431	0.8318
234	KIAA1614	57710	0.8313	0.0186	KIAA1614								KIAA1614	0.8313
235	OBSCN	84033	0.8311	0.0082	obscurin, cytoskeletal calmodulin and titin-interacting RhoGEF								OBSCN	0.8311
236	TUSC5	286753	0.8304	0.0135	tumor suppressor candidate 5								TUSC5	0.8304
237	PLEKHH3	79990	0.8303	0.0061	pleckstrin homology domain containing, family H (with MyTH4 domain) member 3								PLEKHH3	0.8303
238	ODF3L2	284451	0.8296	0.0298	outer dense fiber of sperm tails 3-like 2								ODF3L2	0.8296
239	RDH13	112724	0.8296	0.007	retinol dehydrogenase 13 (all-trans/9-cis)								RDH13	0.8296
240	C6ORF25	80739	0.8296	0.0019	chromosome 6 open reading frame 25								C6ORF25	0.8296
241	DPT	1805	0.8296	0.0176	dermatopontin								DPT	0.8296
242	LHB	3972	0.8295	0.0254	luteinizing hormone beta polypeptide								LHB	0.8295
243	AIRE	326	0.8292	0.0431	autoimmune regulator								AIRE	0.8292
244	CHRNA10	57053	0.8291	0.0018	cholinergic receptor, nicotinic, alpha 10 (neuronal)								CHRNA10	0.8291
245	FFAR1	2864	0.8288	0.0085	free fatty acid receptor 1								FFAR1	0.8288
246	ANKS3	124401	0.8286	0.01	ankyrin repeat and sterile alpha motif domain containing 3								ANKS3	0.8286
247	MYOD1	4654	0.8285	0.033	myogenic differentiation 1								MYOD1	0.8285
248	LINC00176	284739	0.8275	0.0069	long intergenic non-protein coding RNA 176								LINC00176	0.8275
249	LOC389332	389332	0.8274	0.0185	uncharacterized LOC389332								LOC389332	0.8274
250	NPFF	8620	0.826	0.0216	neuropeptide FF-amide peptide precursor								NPFF	0.826
251	RAX2	84839	0.8257	0.0156	retina and anterior neural fold homeobox 2								RAX2	0.8257
252	NFATC4	4776	0.8257	0.0671	nuclear factor of activated T-cells, cytoplasmic, calcineurin-dependent 4								NFATC4	0.8257
253	TLX2	3196	0.8256	0.0384	T-cell leukemia homeobox 2								TLX2	0.8256
254	ELF3	1999	0.8254	0.0125	E74-like factor 3 (ets domain transcription factor, epithelial-specific )								ELF3	0.8254
255	MLXIPL	51085	0.8248	0.0416	MLX interacting protein-like								MLXIPL	0.8248
256	ZBTB7B	51043	0.8246	0.0709	zinc finger and BTB domain containing 7B								ZBTB7B	0.8246
257	PPP1R37	284352	0.8235	0.0361	protein phosphatase 1, regulatory subunit 37								PPP1R37	0.8235
258	NOXA1	10811	0.8232	0.0338	NADPH oxidase activator 1								NOXA1	0.8232
259	TRMT61A	115708	0.8231	0.0847	tRNA methyltransferase 61 homolog A (S. cerevisiae)								TRMT61A	0.8231
260	PGLYRP1	8993	0.823	0.0119	peptidoglycan recognition protein 1								PGLYRP1	0.823
261	AQP7	364	0.8227	0.0004	aquaporin 7								AQP7	0.8227
262	BAHCC1	57597	0.8211	0.0033	BAH domain and coiled-coil containing 1								BAHCC1	0.8211
263	TPSG1	25823	0.821	0.0661	tryptase gamma 1								TPSG1	0.821
264	TBX4	9496	0.8208	0.0036	T-box 4								TBX4	0.8208
265	KRT3	3850	0.8206	0.0074	keratin 3								KRT3	0.8206
266	TNS4	84951	0.8203	0.0181	tensin 4								TNS4	0.8203
267	CPA5	93979	0.8199	0.0004	carboxypeptidase A5								CPA5	0.8199
268	LOC286359	286359	0.8199	0.0057	uncharacterized LOC286359								LOC286359	0.8199
269	IGFN1	91156	0.8188	0.0065	immunoglobulin-like and fibronectin type III domain containing 1								IGFN1	0.8188
270	USHBP1	83878	0.8188	0.0192	Usher syndrome 1C binding protein 1								USHBP1	0.8188
271	SPN	6693	0.8187	0.0171	sialophorin								SPN	0.8187
272	LRRC56	115399	0.8186	0.0147	leucine rich repeat containing 56								LRRC56	0.8186
273	MLN	4295	0.8185	0.0104	motilin								MLN	0.8185
274	MEX3A	92312	0.8184	0.0333	mex-3 homolog A (C. elegans)								MEX3A	0.8184
275	GJD4	219770	0.8184	0.0123	gap junction protein, delta 4, 40.1kDa								GJD4	0.8184
276	RNF151	146310	0.8184	0.0101	ring finger protein 151								RNF151	0.8184
277	NTN3	4917	0.8184	0.0159	netrin 3								NTN3	0.8184
278	NPHS1	4868	0.8181	0.0109	nephrosis 1, congenital, Finnish type (nephrin)								NPHS1	0.8181
279	BARX1	56033	0.8171	0.0094	BARX homeobox 1								BARX1	0.8171
280	REM1	28954	0.817	0.0236	RAS (RAD and GEM)-like GTP-binding 1								REM1	0.817
281	CLCN1	1180	0.817	0.0358	chloride channel, voltage-sensitive 1								CLCN1	0.817
282	C1ORF170	84808	0.8167	0.0522	chromosome 1 open reading frame 170								C1ORF170	0.8167
283	FLJ45983	399717	0.8165	0.0132	uncharacterized LOC399717								FLJ45983	0.8165
284	HMX1	3166	0.8164	0.0627	H6 family homeobox 1								HMX1	0.8164
285	GZMM	3004	0.8164	0.023	granzyme M (lymphocyte met-ase 1)								GZMM	0.8164
286	AMH	268	0.8162	0.0082	anti-Mullerian hormone								AMH	0.8162
287	SPACA3	124912	0.8161	0.0017	sperm acrosome associated 3								SPACA3	0.8161
288	SRPK3	26576	0.8161	0.0439	SRSF protein kinase 3								SRPK3	0.8161
289	SMTNL1	219537	0.8154	0.0213	smoothelin-like 1								SMTNL1	0.8154
290	TTC36	143941	0.8153	0.0137	tetratricopeptide repeat domain 36								TTC36	0.8153
291	KCNQ1DN	55539	0.8153	0.074	KCNQ1 downstream neighbor (non-protein coding)								KCNQ1DN	0.8153
292	SIX5	147912	0.8153	0.0231	SIX homeobox 5								SIX5	0.8153
293	CLEC10A	10462	0.8149	0.0126	C-type lectin domain family 10, member A								CLEC10A	0.8149
294	FAM132A	388581	0.8149	0.002	family with sequence similarity 132, member A								FAM132A	0.8149
295	HOXA11-AS	221883	0.814	0.0016	HOXA11 antisense RNA (non-protein coding)								HOXA11-AS	0.814
296	POMC	5443	0.814	0.0122	proopiomelanocortin								POMC	0.814
297	GNAT1	2779	0.8139	0.0449	guanine nucleotide binding protein (G protein), alpha transducing activity polypeptide 1								GNAT1	0.8139
298	GJC2	57165	0.8138	0.103	gap junction protein, gamma 2, 47kDa								GJC2	0.8138
299	ZMYND15	84225	0.8135	0.0132	zinc finger, MYND-type containing 15								ZMYND15	0.8135
300	C16ORF86	388284	0.8135	0.0322	chromosome 16 open reading frame 86								C16ORF86	0.8135
301	FBXO24	26261	0.8129	0.0341	F-box protein 24								FBXO24	0.8129
302	KLK2	3817	0.8127	0.114	kallikrein-related peptidase 2								KLK2	0.8127
303	NCR1	9437	0.8126	0.0934	natural cytotoxicity triggering receptor 1								NCR1	0.8126
304	ZNF446	55663	0.8116	0.052	zinc finger protein 446								ZNF446	0.8116
305	LHX1	3975	0.8114	0.0142	LIM homeobox 1								LHX1	0.8114
306	SGCA	6442	0.8113	0.0169	sarcoglycan, alpha (50kDa dystrophin-associated glycoprotein)								SGCA	0.8113
307	LRRC45	201255	0.8111	0.0305	leucine rich repeat containing 45								LRRC45	0.8111
308	SCTR	6344	0.8103	0.0146	secretin receptor								SCTR	0.8103
309	HSPG2	3339	0.8094	0.0422	heparan sulfate proteoglycan 2								HSPG2	0.8094
310	C8ORF73	642475	0.8094	0.0273	chromosome 8 open reading frame 73								C8ORF73	0.8094
311	CLCNKB	1188	0.8092	0.0199	chloride channel, voltage-sensitive Kb								CLCNKB	0.8092
312	SSTR5	6755	0.8086	0.0086	somatostatin receptor 5								SSTR5	0.8086
313	RAX	30062	0.8082	0.0627	retina and anterior neural fold homeobox								RAX	0.8082
314	EVX1	2128	0.8082	0.0826	even-skipped homeobox 1								EVX1	0.8082
315	LINC00482	284185	0.8081	0.0346	long intergenic non-protein coding RNA 482								LINC00482	0.8081
316	MYCNOS	10408	0.8081	0.0187	MYCN opposite strand/antisense RNA (non-protein coding)								MYCNOS	0.8081
317	CHRNG	1146	0.8079	0.0088	cholinergic receptor, nicotinic, gamma (muscle)								CHRNG	0.8079
318	SCT	6343	0.8077	0.0114	secretin								SCT	0.8077
319	LY6D	8581	0.8076	0.0065	lymphocyte antigen 6 complex, locus D								LY6D	0.8076
320	KCNQ1	3784	0.8076	0.0177	potassium voltage-gated channel, KQT-like subfamily, member 1								KCNQ1	0.8076
321	JPH2	57158	0.8075	0.0538	junctophilin 2								JPH2	0.8075
322	SLC13A2	9058	0.8068	0.0222	solute carrier family 13 (sodium-dependent dicarboxylate transporter), member 2								SLC13A2	0.8068
323	NPPB	4879	0.8062	0.0186	natriuretic peptide B								NPPB	0.8062
324	TMPRSS6	164656	0.8057	0.1334	transmembrane protease, serine 6								TMPRSS6	0.8057
325	FAM215A	23591	0.8056	0.012	family with sequence similarity 215, member A (non-protein coding)								FAM215A	0.8056
326	KCNA7	3743	0.8055	0.0048	potassium voltage-gated channel, shaker-related subfamily, member 7								KCNA7	0.8055
327	FAM83E	54854	0.8055	0.0054	family with sequence similarity 83, member E								FAM83E	0.8055
328	ALPPL2	251	0.8053	0.0432	alkaline phosphatase, placental-like 2								ALPPL2	0.8053
329	SPATC1	375686	0.8051	0.0265	spermatogenesis and centriole associated 1								SPATC1	0.8051
330	ARTN	9048	0.8051	0.0243	artemin								ARTN	0.8051
331	A4GALT	53947	0.8049	0.0383	alpha 1,4-galactosyltransferase								A4GALT	0.8049
332	C11ORF21	29125	0.8046	0.0075	chromosome 11 open reading frame 21								C11ORF21	0.8046
333	CHRNA4	1137	0.8036	0.1479	cholinergic receptor, nicotinic, alpha 4 (neuronal)								CHRNA4	0.8036
334	null	7421	0.8032	0.0046	null								null	0.8032
335	CIRBP-AS1	148046	0.803	0.0313	CIRBP antisense RNA 1 (non-protein coding)								CIRBP-AS1	0.803
336	AOC4	90586	0.8028	0.1138	amine oxidase, copper containing 3 (vascular adhesion protein 1) pseudogene								AOC4	0.8028
337	WNT11	7481	0.8025	0.0148	wingless-type MMTV integration site family, member 11								WNT11	0.8025
338	CYP4F8	11283	0.8022	0.001	cytochrome P450, family 4, subfamily F, polypeptide 8								CYP4F8	0.8022
339	NEUROG3	50674	0.8021	0.0071	neurogenin 3								NEUROG3	0.8021
340	FGF21	26291	0.8015	0.0205	fibroblast growth factor 21								FGF21	0.8015
341	TEX13A	56157	0.8012	0.0444	testis expressed 13A								TEX13A	0.8012
342	DES	1674	0.801	0.0455	desmin								DES	0.801
343	FGF8	2253	0.8007	0.0044	fibroblast growth factor 8 (androgen-induced)								FGF8	0.8007
344	TREX2	11219	0.8007	0.0034	three prime repair exonuclease 2								TREX2	0.8007
345	GAS2L2	246176	0.8006	0.0429	growth arrest-specific 2 like 2								GAS2L2	0.8006
346	ANO9	338440	0.8002	0.0157	anoctamin 9								ANO9	0.8002
347	CHRD	8646	0.8002	0.0707	chordin								CHRD	0.8002
348	KHDC3L	154288	0.8001	0.0395	KH domain containing 3-like, subcortical maternal complex member								KHDC3L	0.8001
349	RASSF7	8045	0.7997	0.0567	Ras association (RalGDS/AF-6) domain family (N-terminal) member 7								RASSF7	0.7997
350	RFX1	5989	0.7992	0.0142	regulatory factor X, 1 (influences HLA class II expression)								RFX1	0.7992
351	FGFR4	2264	0.7982	0.0167	fibroblast growth factor receptor 4								FGFR4	0.7982
352	DNASE1L2	1775	0.798	0.0053	deoxyribonuclease I-like 2								DNASE1L2	0.798
353	CA9	768	0.7979	0.0068	carbonic anhydrase IX								CA9	0.7979
354	KRT85	3891	0.7978	0.0494	keratin 85								KRT85	0.7978
355	PITX3	5309	0.7974	0.0982	paired-like homeodomain 3								PITX3	0.7974
356	TRIM7	81786	0.7971	0.0019	tripartite motif containing 7								TRIM7	0.7971
357	IQCC	55721	0.7967	0.0236	IQ motif containing C								IQCC	0.7967
358	TLR9	54106	0.7964	0.0043	toll-like receptor 9								TLR9	0.7964
359	MUC2	4583	0.7956	0.0457	mucin 2, oligomeric mucus/gel-forming								MUC2	0.7956
360	SLC52A1	55065	0.7953	0.0036	solute carrier family 52, riboflavin transporter, member 1								SLC52A1	0.7953
361	PRSS22	64063	0.7947	0.0177	protease, serine, 22								PRSS22	0.7947
362	ZNF688	146542	0.7946	0.0458	zinc finger protein 688								ZNF688	0.7946
363	SRRM3	222183	0.7946	0.0523	serine/arginine repetitive matrix 3								SRRM3	0.7946
364	HGFAC	3083	0.7944	0.0238	HGF activator								HGFAC	0.7944
365	CLDN14	23562	0.7942	0.0013	claudin 14								CLDN14	0.7942
366	GPR135	64582	0.794	0.0824	G protein-coupled receptor 135								GPR135	0.794
367	KLK12	43849	0.7939	0.0277	kallikrein-related peptidase 12								KLK12	0.7939
368	C16ORF71	146562	0.7936	0.0266	chromosome 16 open reading frame 71								C16ORF71	0.7936
369	GPR110	266977	0.7935	0.0052	G protein-coupled receptor 110								GPR110	0.7935
370	C16ORF11	146325	0.7935	0.0247	chromosome 16 open reading frame 11								C16ORF11	0.7935
371	CLCF1	23529	0.793	0.0291	cardiotrophin-like cytokine factor 1								CLCF1	0.793
372	C1ORF200	644997	0.7927	0.1257	chromosome 1 open reading frame 200								C1ORF200	0.7927
373	FAM75E1	286234	0.7926	0.0276	family with sequence similarity 75, member E1								FAM75E1	0.7926
374	GOLGA2P5	55592	0.7925	0.0099	golgin A2 pseudogene 5								GOLGA2P5	0.7925
375	ZAP70	7535	0.7923	0.0227	zeta-chain (TCR) associated protein kinase 70kDa								ZAP70	0.7923
376	DIO3	1735	0.7922	0.0083	deiodinase, iodothyronine, type III								DIO3	0.7922
377	POU3F4	5456	0.7921	0.0177	POU class 3 homeobox 4								POU3F4	0.7921
378	HIC1	3090	0.7921	0.0306	hypermethylated in cancer 1								HIC1	0.7921
379	OVOL3	728361	0.7919	0.1364	ovo-like 3 (Drosophila)								OVOL3	0.7919
380	GCGR	2642	0.7919	0.0314	glucagon receptor								GCGR	0.7919
381	TRPV6	55503	0.7915	0.0186	transient receptor potential cation channel, subfamily V, member 6								TRPV6	0.7915
382	TGM6	343641	0.7915	0.1007	transglutaminase 6								TGM6	0.7915
383	TRIM17	51127	0.7914	0.022	tripartite motif containing 17								TRIM17	0.7914
384	NFAM1	150372	0.7914	0.0565	NFAT activating protein with ITAM motif 1								NFAM1	0.7914
385	DKKL1	27120	0.7913	0.0273	dickkopf-like 1								DKKL1	0.7913
386	PLA2G4F	255189	0.791	0.0093	phospholipase A2, group IVF								PLA2G4F	0.791
387	BAIAP2L2	80115	0.7909	0.0104	BAI1-associated protein 2-like 2								BAIAP2L2	0.7909
388	DPCR1	135656	0.7909	0.005	diffuse panbronchiolitis critical region 1								DPCR1	0.7909
389	IL17C	27189	0.7906	0.0471	interleukin 17C								IL17C	0.7906
390	HOXA-AS2	285943	0.7902	0.0062	HOXA cluster antisense RNA 2 (non-protein coding)								HOXA-AS2	0.7902
391	MUC13	56667	0.7895	0.0111	mucin 13, cell surface associated								MUC13	0.7895
392	LMX1B	4010	0.7893	0.0115	LIM homeobox transcription factor 1, beta								LMX1B	0.7893
393	P2RX2	22953	0.7893	0.1536	purinergic receptor P2X, ligand-gated ion channel, 2								P2RX2	0.7893
394	SCARF2	91179	0.7893	0.0467	scavenger receptor class F, member 2								SCARF2	0.7893
395	CCDC40	55036	0.7892	0.0224	coiled-coil domain containing 40								CCDC40	0.7892
396	AKAP4	8852	0.7891	0.0042	A kinase (PRKA) anchor protein 4								AKAP4	0.7891
397	FOXH1	8928	0.789	0.0362	forkhead box H1								FOXH1	0.789
398	LOC728743	728743	0.7888	0.0279	zinc finger protein pseudogene								LOC728743	0.7888
399	LEPREL2	10536	0.7888	0.0267	leprecan-like 2								LEPREL2	0.7888
400	PADI1	29943	0.7884	0.1232	peptidyl arginine deiminase, type I								PADI1	0.7884
401	GUCY2F	2986	0.7878	0.0017	guanylate cyclase 2F, retinal								GUCY2F	0.7878
402	EPS8L1	54869	0.7877	0.0339	EPS8-like 1								EPS8L1	0.7877
403	FLT4	2324	0.7875	0.0085	fms-related tyrosine kinase 4								FLT4	0.7875
404	PTGIR	5739	0.7872	0.0795	prostaglandin I2 (prostacyclin) receptor (IP)								PTGIR	0.7872
405	CD79B	974	0.7867	0.0185	CD79b molecule, immunoglobulin-associated beta								CD79B	0.7867
406	NR5A1	2516	0.7864	0.0276	nuclear receptor subfamily 5, group A, member 1								NR5A1	0.7864
407	PIAS4	51588	0.7863	0.0194	protein inhibitor of activated STAT, 4								PIAS4	0.7863
408	CD7	924	0.7862	0.0288	CD7 molecule								CD7	0.7862
409	PLK5	126520	0.7862	0.0714	polo-like kinase 5								PLK5	0.7862
410	TCF15	6939	0.7858	0.0372	transcription factor 15 (basic helix-loop-helix)								TCF15	0.7858
411	TTC22	55001	0.7858	0.0167	tetratricopeptide repeat domain 22								TTC22	0.7858
412	ZRANB2-AS1	100132618	0.7857	0	ZRANB2 antisense RNA 1 (non-protein coding)								ZRANB2-AS1	0.7857
413	PTPRCAP	5790	0.7856	0.0334	protein tyrosine phosphatase, receptor type, C-associated protein								PTPRCAP	0.7856
414	SIGLEC7	27036	0.7856	0.0994	sialic acid binding Ig-like lectin 7								SIGLEC7	0.7856
415	CARD11	84433	0.7854	0.0137	caspase recruitment domain family, member 11								CARD11	0.7854
416	SHH	6469	0.7851	0.0122	sonic hedgehog								SHH	0.7851
417	CELA2A	63036	0.7849	0.0073	chymotrypsin-like elastase family, member 2A								CELA2A	0.7849
418	FBXL8	55336	0.7847	0.0041	F-box and leucine-rich repeat protein 8								FBXL8	0.7847
419	CAPN11	11131	0.7846	0.0011	calpain 11								CAPN11	0.7846
420	LINC00608	151300	0.7844	0.0396	long intergenic non-protein coding RNA 608								LINC00608	0.7844
421	MARCO	8685	0.7841	0.013	macrophage receptor with collagenous structure								MARCO	0.7841
422	HKDC1	80201	0.784	0.002	hexokinase domain containing 1								HKDC1	0.784
423	EXOC3L4	91828	0.7836	0.0539	exocyst complex component 3-like 4								EXOC3L4	0.7836
424	HCRT	3060	0.7829	0.0297	hypocretin (orexin) neuropeptide precursor								HCRT	0.7829
425	HOXB-AS5	360205	0.7824	0	HOXB cluster antisense RNA 5 (non-protein coding)								HOXB-AS5	0.7824
426	CABP4	57010	0.7822	0.0913	calcium binding protein 4								CABP4	0.7822
427	KIAA1875	340390	0.7821	0.0066	KIAA1875								KIAA1875	0.7821
428	C20ORF151	140893	0.7819	0.035	chromosome 20 open reading frame 151								C20ORF151	0.7819
429	C8ORF74	203076	0.7815	0.1017	chromosome 8 open reading frame 74								C8ORF74	0.7815
430	SAA3P	6290	0.7814	0	serum amyloid A3 pseudogene								SAA3P	0.7814
431	JSRP1	126306	0.7814	0.0298	junctional sarcoplasmic reticulum protein 1								JSRP1	0.7814
432	DYRK1B	9149	0.7812	0.0836	dual-specificity tyrosine-(Y)-phosphorylation regulated kinase 1B								DYRK1B	0.7812
433	PHOX2A	401	0.7811	0.034	paired-like homeobox 2a								PHOX2A	0.7811
434	C20ORF181	100128998	0.7811	0.1071	chromosome 20 open reading frame 181								C20ORF181	0.7811
435	TM6SF2	53345	0.781	0.0326	transmembrane 6 superfamily member 2								TM6SF2	0.781
436	CCL24	6369	0.7809	0.0085	chemokine (C-C motif) ligand 24								CCL24	0.7809
437	MYOM3	127294	0.7807	0.0121	myomesin family, member 3								MYOM3	0.7807
438	GJA8	2703	0.7807	0.1016	gap junction protein, alpha 8, 50kDa								GJA8	0.7807
439	H1FNT	341567	0.7806	0.1065	H1 histone family, member N, testis-specific								H1FNT	0.7806
440	KISS1	3814	0.7804	0.0172	KiSS-1 metastasis-suppressor								KISS1	0.7804
441	SLC34A1	6569	0.7802	0.0111	solute carrier family 34 (sodium phosphate), member 1								SLC34A1	0.7802
442	XRCC3	7517	0.7801	0.0391	X-ray repair complementing defective repair in Chinese hamster cells 3								XRCC3	0.7801
443	EVC	2121	0.7801	0.0367	Ellis van Creveld syndrome								EVC	0.7801
444	CECR5-AS1	100130717	0.78	0.0046	CECR5 antisense RNA 1 (non-protein coding)								CECR5-AS1	0.78
445	TMEM40	55287	0.7798	0.0119	transmembrane protein 40								TMEM40	0.7798
446	C14ORF80	283643	0.7797	0.0408	chromosome 14 open reading frame 80								C14ORF80	0.7797
447	EMILIN1	11117	0.7796	0.0359	elastin microfibril interfacer 1								EMILIN1	0.7796
448	PP14571	100130449	0.7794	0.0047	uncharacterized LOC100130449								PP14571	0.7794
449	CYP2A13	1553	0.7794	0.0256	cytochrome P450, family 2, subfamily A, polypeptide 13								CYP2A13	0.7794
450	COMTD1	118881	0.7793	0.0343	catechol-O-methyltransferase domain containing 1								COMTD1	0.7793
451	LILRP2	79166	0.7791	0.008	leukocyte immunoglobulin-like receptor pseudogene 2								LILRP2	0.7791
452	MYO7B	4648	0.779	0.0051	myosin VIIB								MYO7B	0.779
453	ZNF205	7755	0.779	0.0477	zinc finger protein 205								ZNF205	0.779
454	UPB1	51733	0.779	0.0178	ureidopropionase, beta								UPB1	0.779
455	FSTL3	10272	0.7788	0.0421	follistatin-like 3 (secreted glycoprotein)								FSTL3	0.7788
456	C3ORF22	152065	0.7782	0.0183	chromosome 3 open reading frame 22								C3ORF22	0.7782
457	ZNF556	80032	0.7782	0.0024	zinc finger protein 556								ZNF556	0.7782
458	PRSS50	29122	0.7774	0.0209	protease, serine, 50								PRSS50	0.7774
459	GRIN2D	2906	0.7773	0.0409	glutamate receptor, ionotropic, N-methyl D-aspartate 2D								GRIN2D	0.7773
460	NOTUM	147111	0.7772	0.0234	notum pectinacetylesterase homolog (Drosophila)								NOTUM	0.7772
461	PKP3	11187	0.7771	0.0386	plakophilin 3								PKP3	0.7771
462	GPT	2875	0.777	0.0192	glutamic-pyruvate transaminase (alanine aminotransferase)								GPT	0.777
463	RSPO1	284654	0.777	0.0069	R-spondin 1								RSPO1	0.777
464	ARVCF	421	0.7769	0.1181	armadillo repeat gene deleted in velocardiofacial syndrome								ARVCF	0.7769
465	BBC3	27113	0.7767	0.056	BCL2 binding component 3								BBC3	0.7767
466	MAP2K7	5609	0.7766	0.0554	mitogen-activated protein kinase kinase 7								MAP2K7	0.7766
467	NMRK2	27231	0.7764	0.0268	nicotinamide riboside kinase 2								NMRK2	0.7764
468	EDN2	1907	0.7764	0.0053	endothelin 2								EDN2	0.7764
469	ZNRF4	148066	0.7761	0.1149	zinc and ring finger 4								ZNRF4	0.7761
470	ZNF444	55311	0.7759	0.0669	zinc finger protein 444								ZNF444	0.7759
471	MICALCL	84953	0.7759	0.0014	MICAL C-terminal like								MICALCL	0.7759
472	CRHR1	1394	0.7756	0.1303	corticotropin releasing hormone receptor 1								CRHR1	0.7756
473	CYMP	643160	0.7755	0	chymosin pseudogene								CYMP	0.7755
474	APOBR	55911	0.7753	0.0273	apolipoprotein B receptor								APOBR	0.7753
475	IL17B	27190	0.7747	0.0061	interleukin 17B								IL17B	0.7747
476	GRM4	2914	0.7746	0.0601	glutamate receptor, metabotropic 4								GRM4	0.7746
477	PDZK1IP1	10158	0.7745	0.0094	PDZK1 interacting protein 1								PDZK1IP1	0.7745
478	RARA	5914	0.7743	0.0686	retinoic acid receptor, alpha								RARA	0.7743
479	MFSD7	84179	0.774	0.0232	major facilitator superfamily domain containing 7								MFSD7	0.774
480	SEMA6C	10500	0.7739	0.1162	sema domain, transmembrane domain (TM), and cytoplasmic domain, (semaphorin) 6C								SEMA6C	0.7739
481	RUNX1	861	0.7737	0.0296	runt-related transcription factor 1								RUNX1	0.7737
482	LAMC2	3918	0.7737	0.019	laminin, gamma 2								LAMC2	0.7737
483	IL11	3589	0.7734	0.0338	interleukin 11								IL11	0.7734
484	NXNL1	115861	0.7734	0.0436	nucleoredoxin-like 1								NXNL1	0.7734
485	HAO2	51179	0.7732	0.0075	hydroxyacid oxidase 2 (long chain)								HAO2	0.7732
486	MORN1	79906	0.7727	0.0428	MORN repeat containing 1								MORN1	0.7727
487	AQP5	362	0.7727	0.0305	aquaporin 5								AQP5	0.7727
488	TNFRSF4	7293	0.7724	0.0191	tumor necrosis factor receptor superfamily, member 4								TNFRSF4	0.7724
489	ALDH3B2	222	0.7724	0.006	aldehyde dehydrogenase 3 family, member B2								ALDH3B2	0.7724
490	DUSP15	128853	0.7717	0.0241	dual specificity phosphatase 15								DUSP15	0.7717
491	LTA	4049	0.7715	0.0237	lymphotoxin alpha (TNF superfamily, member 1)								LTA	0.7715
492	HDAC10	83933	0.7715	0.0377	histone deacetylase 10								HDAC10	0.7715
493	B3GNT8	374907	0.7715	0.0139	UDP-GlcNAc:betaGal beta-1,3-N-acetylglucosaminyltransferase 8								B3GNT8	0.7715
494	FOXL1	2300	0.7714	0.0217	forkhead box L1								FOXL1	0.7714
495	PTGDR2	11251	0.7707	0.0424	prostaglandin D2 receptor 2								PTGDR2	0.7707
496	TNFRSF18	8784	0.7706	0.0098	tumor necrosis factor receptor superfamily, member 18								TNFRSF18	0.7706
497	PCDH1	5097	0.7704	0.0994	protocadherin 1								PCDH1	0.7704
498	CDX2	1045	0.7704	0.0173	caudal type homeobox 2								CDX2	0.7704
499	TBX6	6911	0.7698	0.1154	T-box 6								TBX6	0.7698
500	SPPL2C	162540	0.7697	0.0367	signal peptide peptidase like 2C								SPPL2C	0.7697
501	SCUBE1	80274	0.7694	0.0229	signal peptide, CUB domain, EGF-like 1								SCUBE1	0.7694
502	FAM181A-AS1	283592	0.7692	0	FAM181A antisense RNA 1 (non-protein coding)								FAM181A-AS1	0.7692
503	SLC9A3	6550	0.7692	0.0035	solute carrier family 9, subfamily A (NHE3, cation proton antiporter 3), member 3								SLC9A3	0.7692
504	MAP3K10	4294	0.769	0.1852	mitogen-activated protein kinase kinase kinase 10								MAP3K10	0.769
505	LOC143188	143188	0.7684	0.0528	uncharacterized LOC143188								LOC143188	0.7684
506	ACTL8	81569	0.768	0.0321	actin-like 8								ACTL8	0.768
507	PAX2	5076	0.768	0.0287	paired box 2								PAX2	0.768
508	TM4SF5	9032	0.7679	0.0391	transmembrane 4 L six family member 5								TM4SF5	0.7679
509	HHLA2	11148	0.7677	0.0007	HERV-H LTR-associating 2								HHLA2	0.7677
510	SLC6A2	6530	0.7675	0.0558	solute carrier family 6 (neurotransmitter transporter, noradrenalin), member 2								SLC6A2	0.7675
511	INSRR	3645	0.7675	0.0243	insulin receptor-related receptor								INSRR	0.7675
512	RTEL1	51750	0.7672	0.0914	regulator of telomere elongation helicase 1								RTEL1	0.7672
513	LHX5	64211	0.7672	0.0344	LIM homeobox 5								LHX5	0.7672
514	SEC14L4	284904	0.767	0.0013	SEC14-like 4 (S. cerevisiae)								SEC14L4	0.767
515	RECQL5	9400	0.7665	0.0716	RecQ protein-like 5								RECQL5	0.7665
516	FITM1	161247	0.7664	0.0096	fat storage-inducing transmembrane protein 1								FITM1	0.7664
517	SLC4A9	83697	0.7661	0.0184	solute carrier family 4, sodium bicarbonate cotransporter, member 9								SLC4A9	0.7661
518	DKFZP779M0652	374387	0.766	0.074	uncharacterized DKFZp779M0652								DKFZP779M0652	0.766
519	PRSS8	5652	0.766	0.0227	protease, serine, 8								PRSS8	0.766
520	SLC5A2	6524	0.7657	0.1474	solute carrier family 5 (sodium/glucose cotransporter), member 2								SLC5A2	0.7657
521	RS1	6247	0.7652	0.0228	retinoschisin 1								RS1	0.7652
522	CIITA	4261	0.7651	0.0147	class II, major histocompatibility complex, transactivator								CIITA	0.7651
523	DBH	1621	0.7647	0.0486	dopamine beta-hydroxylase (dopamine beta-monooxygenase)								DBH	0.7647
524	TRPV4	59341	0.7644	0.0291	transient receptor potential cation channel, subfamily V, member 4								TRPV4	0.7644
525	GPR97	222487	0.7642	0.0277	G protein-coupled receptor 97								GPR97	0.7642
526	MRGPRF	116535	0.7641	0.0231	MAS-related GPR, member F								MRGPRF	0.7641
527	TAC4	255061	0.7639	0.0097	tachykinin 4 (hemokinin)								TAC4	0.7639
528	SHANK1	50944	0.7634	0.0457	SH3 and multiple ankyrin repeat domains 1								SHANK1	0.7634
529	CTRC	11330	0.7633	0.0961	chymotrypsin C (caldecrin)								CTRC	0.7633
530	GCKR	2646	0.7632	0.0075	glucokinase (hexokinase 4) regulator								GCKR	0.7632
531	PLEKHG4B	153478	0.7629	0.0108	pleckstrin homology domain containing, family G (with RhoGef domain) member 4B								PLEKHG4B	0.7629
532	MUC1	4582	0.7628	0.0192	mucin 1, cell surface associated								MUC1	0.7628
533	TP53AIP1	63970	0.7627	0.0253	tumor protein p53 regulated apoptosis inducing protein 1								TP53AIP1	0.7627
534	FNDC8	54752	0.7627	0.0398	fibronectin type III domain containing 8								FNDC8	0.7627
535	CDH16	1014	0.7627	0.021	cadherin 16, KSP-cadherin								CDH16	0.7627
536	SRD5A2	6716	0.7625	0.0375	steroid-5-alpha-reductase, alpha polypeptide 2 (3-oxo-5 alpha-steroid delta 4-dehydrogenase alpha 2)								SRD5A2	0.7625
537	TNFRSF13B	23495	0.7625	0.0436	tumor necrosis factor receptor superfamily, member 13B								TNFRSF13B	0.7625
538	MUC6	4588	0.7623	0.0821	mucin 6, oligomeric mucus/gel-forming								MUC6	0.7623
539	PODNL1	79883	0.7621	0.0061	podocan-like 1								PODNL1	0.7621
540	TNNI1	7135	0.762	0.0138	troponin I type 1 (skeletal, slow)								TNNI1	0.762
541	TBX5	6910	0.7619	0.0529	T-box 5								TBX5	0.7619
542	MC1R	4157	0.7619	0.0518	melanocortin 1 receptor (alpha melanocyte stimulating hormone receptor)								MC1R	0.7619
543	TCL6	27004	0.7615	0.0943	T-cell leukemia/lymphoma 6 (non-protein coding)								TCL6	0.7615
544	SLC26A10	65012	0.761	0.0251	solute carrier family 26, member 10								SLC26A10	0.761
545	AMN	81693	0.7607	0.0195	amnionless homolog (mouse)								AMN	0.7607
546	NTN5	126147	0.7604	0.0123	netrin 5								NTN5	0.7604
547	RBPJL	11317	0.7601	0.0289	recombination signal binding protein for immunoglobulin kappa J region-like								RBPJL	0.7601
548	GSC2	2928	0.7598	0.0046	goosecoid homeobox 2								GSC2	0.7598
549	GLP1R	2740	0.7593	0.196	glucagon-like peptide 1 receptor								GLP1R	0.7593
550	MARVELD3	91862	0.7591	0.017	MARVEL domain containing 3								MARVELD3	0.7591
551	MUC5B	727897	0.7589	0.0211	mucin 5B, oligomeric mucus/gel-forming								MUC5B	0.7589
552	GPR132	29933	0.7581	0.0347	G protein-coupled receptor 132								GPR132	0.7581
553	EVPL	2125	0.758	0.041	envoplakin								EVPL	0.758
554	CELA3B	23436	0.7579	0.0049	chymotrypsin-like elastase family, member 3B								CELA3B	0.7579
555	LOC221122	221122	0.7578	0	uncharacterized LOC221122								LOC221122	0.7578
556	KLF1	10661	0.7574	0.014	Kruppel-like factor 1 (erythroid)								KLF1	0.7574
557	NKX2-1	7080	0.757	0.0122	NK2 homeobox 1								NKX2-1	0.757
558	PGK2	5232	0.7569	0.0052	phosphoglycerate kinase 2								PGK2	0.7569
559	IL17RE	132014	0.7565	0.011	interleukin 17 receptor E								IL17RE	0.7565
560	MYO15A	51168	0.7558	0.0744	myosin XVA								MYO15A	0.7558
561	OSM	5008	0.7556	0.0118	oncostatin M								OSM	0.7556
562	ARHGEF16	27237	0.7553	0.0723	Rho guanine nucleotide exchange factor (GEF) 16								ARHGEF16	0.7553
563	C9ORF169	375791	0.7547	0.0461	chromosome 9 open reading frame 169								C9ORF169	0.7547
564	CCDC105	126402	0.7545	0.0371	coiled-coil domain containing 105								CCDC105	0.7545
565	ADAT3	113179	0.7542	0.049	adenosine deaminase, tRNA-specific 3								ADAT3	0.7542
566	C19ORF57	79173	0.754	0.0622	chromosome 19 open reading frame 57								C19ORF57	0.754
567	LRRC16B	90668	0.7538	0.0558	leucine rich repeat containing 16B								LRRC16B	0.7538
568	CACNA1G	8913	0.7535	0.1646	calcium channel, voltage-dependent, T type, alpha 1G subunit								CACNA1G	0.7535
569	CLDN3	1365	0.7533	0.0243	claudin 3								CLDN3	0.7533
570	CBX8	57332	0.7529	0.0022	chromobox homolog 8								CBX8	0.7529
571	LY6G6E	79136	0.7529	0.0089	lymphocyte antigen 6 complex, locus G6E (pseudogene)								LY6G6E	0.7529
572	FGF18	8817	0.7525	0.0141	fibroblast growth factor 18								FGF18	0.7525
573	RSPO4	343637	0.7523	0.0384	R-spondin 4								RSPO4	0.7523
574	SLC5A8	160728	0.752	0.0103	solute carrier family 5 (iodide transporter), member 8								SLC5A8	0.752
575	NR1I2	8856	0.7516	0.0776	nuclear receptor subfamily 1, group I, member 2								NR1I2	0.7516
576	NT5DC4	284958	0.7515	0.0041	5'-nucleotidase domain containing 4								NT5DC4	0.7515
577	PRM3	58531	0.7514	0.0259	protamine 3								PRM3	0.7514
578	FAM57B	83723	0.7509	0.0687	family with sequence similarity 57, member B								FAM57B	0.7509
579	CSF3	1440	0.7508	0.0615	colony stimulating factor 3 (granulocyte)								CSF3	0.7508
580	PDE6G	5148	0.7505	0.0734	phosphodiesterase 6G, cGMP-specific, rod, gamma								PDE6G	0.7505
581	ENPP7	339221	0.7502	0.0145	ectonucleotide pyrophosphatase/phosphodiesterase 7								ENPP7	0.7502
582	SAMD10	140700	0.7501	0.041	sterile alpha motif domain containing 10								SAMD10	0.7501
583	DNMT3L	29947	0.7498	0.0145	DNA (cytosine-5-)-methyltransferase 3-like								DNMT3L	0.7498
584	CCDC42B	387885	0.7492	0.0692	coiled-coil domain containing 42B								CCDC42B	0.7492
585	ABCC6	368	0.7491	0.0217	ATP-binding cassette, sub-family C (CFTR/MRP), member 6								ABCC6	0.7491
586	C15ORF62	643338	0.7489	0.0039	chromosome 15 open reading frame 62								C15ORF62	0.7489
587	NBEAL2	23218	0.7486	0.0377	neurobeachin-like 2								NBEAL2	0.7486
588	BCL2L10	10017	0.7478	0.0123	BCL2-like 10 (apoptosis facilitator)								BCL2L10	0.7478
589	KRT13	3860	0.7475	0.0029	keratin 13								KRT13	0.7475
590	NOBOX	135935	0.7474	0.091	NOBOX oogenesis homeobox								NOBOX	0.7474
591	DIO3OS	64150	0.7474	0.0229	DIO3 opposite strand/antisense RNA (non-protein coding)								DIO3OS	0.7474
592	TNNT3	7140	0.7471	0.0078	troponin T type 3 (skeletal, fast)								TNNT3	0.7471
593	ETV7	51513	0.7469	0.0337	ets variant 7								ETV7	0.7469
594	GCNT7	140687	0.7468	0.017	glucosaminyl (N-acetyl) transferase family member 7								GCNT7	0.7468
595	APOL5	80831	0.7467	0.0724	apolipoprotein L, 5								APOL5	0.7467
596	CCDC120	90060	0.7462	0.0174	coiled-coil domain containing 120								CCDC120	0.7462
597	WNT6	7475	0.7461	0.0434	wingless-type MMTV integration site family, member 6								WNT6	0.7461
598	RARG	5916	0.7459	0.117	retinoic acid receptor, gamma								RARG	0.7459
599	PKLR	5313	0.7457	0.1442	pyruvate kinase, liver and RBC								PKLR	0.7457
600	KRT31	3881	0.7456	0.0262	keratin 31								KRT31	0.7456
601	PRSS27	83886	0.7455	0.0122	protease, serine 27								PRSS27	0.7455
602	DUOXA1	90527	0.7454	0.0305	dual oxidase maturation factor 1								DUOXA1	0.7454
603	PRB1	5542	0.7453	0.0347	proline-rich protein BstNI subfamily 1								PRB1	0.7453
604	CCL22	6367	0.7448	0.0356	chemokine (C-C motif) ligand 22								CCL22	0.7448
605	PKP1	5317	0.7448	0.0543	plakophilin 1 (ectodermal dysplasia/skin fragility syndrome)								PKP1	0.7448
606	TRPM5	29850	0.7448	0.0356	transient receptor potential cation channel, subfamily M, member 5								TRPM5	0.7448
607	NDUFB2-AS1	100134713	0.7445	0.0216	NDUFB2 antisense RNA 1 (non-protein coding)								NDUFB2-AS1	0.7445
608	MATN1	4146	0.7444	0.1182	matrilin 1, cartilage matrix protein								MATN1	0.7444
609	TERT	7015	0.744	0.0765	telomerase reverse transcriptase								TERT	0.744
610	LOC91450	91450	0.7439	0	uncharacterized LOC91450								LOC91450	0.7439
611	ITGB7	3695	0.7439	0.0326	integrin, beta 7								ITGB7	0.7439
612	PCDHA10	56139	0.7438	0.0819	protocadherin alpha 10								PCDHA10	0.7438
613	TNK1	8711	0.7438	0.0573	tyrosine kinase, non-receptor, 1								TNK1	0.7438
614	EXOC3L2	90332	0.7436	0.1288	exocyst complex component 3-like 2								EXOC3L2	0.7436
615	C17ORF59	54785	0.7434	0.0875	chromosome 17 open reading frame 59								C17ORF59	0.7434
616	VGLL1	51442	0.7434	0.0089	vestigial like 1 (Drosophila)								VGLL1	0.7434
617	SORBS3	10174	0.7432	0.0838	sorbin and SH3 domain containing 3								SORBS3	0.7432
618	KIR3DL2	3812	0.743	0.0168	killer cell immunoglobulin-like receptor, three domains, long cytoplasmic tail, 2								KIR3DL2	0.743
619	WNT9B	7484	0.7425	0.0177	wingless-type MMTV integration site family, member 9B								WNT9B	0.7425
620	PYY2	23615	0.7425	0.1274	peptide YY, 2 (pseudogene)								PYY2	0.7425
621	LOXHD1	125336	0.7423	0.0126	lipoxygenase homology domains 1								LOXHD1	0.7423
622	APOC4	346	0.7422	0.0453	apolipoprotein C-IV								APOC4	0.7422
623	LOC100129104	100129104	0.742	0.0024	uncharacterized LOC100129104								LOC100129104	0.742
624	TMEM105	284186	0.7419	0.0821	transmembrane protein 105								TMEM105	0.7419
625	PTK6	5753	0.7418	0.0282	PTK6 protein tyrosine kinase 6								PTK6	0.7418
626	KLHDC7A	127707	0.7415	0.0161	kelch domain containing 7A								KLHDC7A	0.7415
627	SLC12A9	56996	0.7413	0.0858	solute carrier family 12 (potassium/chloride transporters), member 9								SLC12A9	0.7413
628	FAM170B	170370	0.7412	0.0082	family with sequence similarity 170, member B								FAM170B	0.7412
629	SH3D21	79729	0.7411	0.055	SH3 domain containing 21								SH3D21	0.7411
630	CCDC9	26093	0.7411	0.1408	coiled-coil domain containing 9								CCDC9	0.7411
631	KCNH4	23415	0.7411	0.1228	potassium voltage-gated channel, subfamily H (eag-related), member 4								KCNH4	0.7411
632	SOCS1	8651	0.7408	0.0168	suppressor of cytokine signaling 1								SOCS1	0.7408
633	PITX1	5307	0.7408	0.008	paired-like homeodomain 1								PITX1	0.7408
634	CES1P1	51716	0.7408	0.0548	carboxylesterase 1 pseudogene 1								CES1P1	0.7408
635	SYCE1L	100130958	0.7407	0.0134	synaptonemal complex central element protein 1-like								SYCE1L	0.7407
636	FOXB1	27023	0.7406	0.0228	forkhead box B1								FOXB1	0.7406
637	CDSN	1041	0.7406	0.1131	corneodesmosin								CDSN	0.7406
638	TP53I13	90313	0.7402	0.0385	tumor protein p53 inducible protein 13								TP53I13	0.7402
639	ATHL1	80162	0.7402	0.0319	ATH1, acid trehalase-like 1 (yeast)								ATHL1	0.7402
640	TIGD5	84948	0.7401	0.0448	tigger transposable element derived 5								TIGD5	0.7401
641	XPNPEP2	7512	0.7397	0.0798	X-prolyl aminopeptidase (aminopeptidase P) 2, membrane-bound								XPNPEP2	0.7397
642	NPC1L1	29881	0.7393	0.0675	NPC1 (Niemann-Pick disease, type C1, gene)-like 1								NPC1L1	0.7393
643	HTRA3	94031	0.7391	0.0267	HtrA serine peptidase 3								HTRA3	0.7391
644	CRYGN	155051	0.7391	0.0041	crystallin, gamma N								CRYGN	0.7391
645	ATP6V1B1	525	0.7391	0.002	ATPase, H+ transporting, lysosomal 56/58kDa, V1 subunit B1								ATP6V1B1	0.7391
646	KCNJ5	3762	0.7391	0.1764	potassium inwardly-rectifying channel, subfamily J, member 5								KCNJ5	0.7391
647	VTN	7448	0.7389	0.0045	vitronectin								VTN	0.7389
648	FAM110D	79927	0.7388	0.0717	family with sequence similarity 110, member D								FAM110D	0.7388
649	GLI2	2736	0.7388	0.0362	GLI family zinc finger 2								GLI2	0.7388
650	C2ORF71	388939	0.7385	0.0317	chromosome 2 open reading frame 71								C2ORF71	0.7385
651	C21ORF90	114043	0.7384	0.0223	chromosome 21 open reading frame 90								C21ORF90	0.7384
652	MUC5AC	4586	0.7383	0	mucin 5AC, oligomeric mucus/gel-forming								MUC5AC	0.7383
653	CXCR6	10663	0.7382	0.0361	chemokine (C-X-C motif) receptor 6								CXCR6	0.7382
654	FCAR	2204	0.7381	0.0569	Fc fragment of IgA, receptor for								FCAR	0.7381
655	KRT72	140807	0.7381	0.0017	keratin 72								KRT72	0.7381
656	CYP11B2	1585	0.7378	0.0562	cytochrome P450, family 11, subfamily B, polypeptide 2								CYP11B2	0.7378
657	WFDC3	140686	0.7377	0.0062	WAP four-disulfide core domain 3								WFDC3	0.7377
658	GLTPD2	388323	0.7368	0.0315	glycolipid transfer protein domain containing 2								GLTPD2	0.7368
659	SYT8	90019	0.7366	0.0163	synaptotagmin VIII								SYT8	0.7366
660	GHRLOS	100126793	0.7365	0.0281	ghrelin opposite strand/antisense RNA (non-protein coding)								GHRLOS	0.7365
661	SH2D1A	4068	0.7363	0.0327	SH2 domain containing 1A								SH2D1A	0.7363
662	PDE4C	5143	0.736	0.1447	phosphodiesterase 4C, cAMP-specific								PDE4C	0.736
663	LINC00494	284749	0.7359	0	long intergenic non-protein coding RNA 494								LINC00494	0.7359
664	RAPSN	5913	0.7356	0.0038	receptor-associated protein of the synapse								RAPSN	0.7356
665	CDH23	64072	0.7355	0.0489	cadherin-related 23								CDH23	0.7355
666	KCNQ4	9132	0.7355	0.0562	potassium voltage-gated channel, KQT-like subfamily, member 4								KCNQ4	0.7355
667	CCDC33	80125	0.7353	0.1358	coiled-coil domain containing 33								CCDC33	0.7353
668	VWA7	80737	0.7351	0.1038	von Willebrand factor A domain containing 7								VWA7	0.7351
669	SDK2	54549	0.7351	0.0478	sidekick cell adhesion molecule 2								SDK2	0.7351
670	ICOSLG	23308	0.7348	0.1547	inducible T-cell co-stimulator ligand								ICOSLG	0.7348
671	SMCR5	140771	0.7347	0.0079	Smith-Magenis syndrome chromosome region, candidate 5 (non-protein coding)								SMCR5	0.7347
672	NEUROG1	4762	0.7343	0.0875	neurogenin 1								NEUROG1	0.7343
673	CHRNE	1145	0.7343	0.0383	cholinergic receptor, nicotinic, epsilon (muscle)								CHRNE	0.7343
674	ACTL10	170487	0.7343	0.0428	actin-like 10								ACTL10	0.7343
675	PAX1	5075	0.7342	0.1029	paired box 1								PAX1	0.7342
676	LCN8	138307	0.7341	0.0086	lipocalin 8								LCN8	0.7341
677	GPR25	2848	0.7339	0.0489	G protein-coupled receptor 25								GPR25	0.7339
678	PTGER1	5731	0.7338	0.1583	prostaglandin E receptor 1 (subtype EP1), 42kDa								PTGER1	0.7338
679	FCN1	2219	0.7337	0.0391	ficolin (collagen/fibrinogen domain containing) 1								FCN1	0.7337
680	KRT83	3889	0.7336	0.0615	keratin 83								KRT83	0.7336
681	CXCR5	643	0.7335	0.0867	chemokine (C-X-C motif) receptor 5								CXCR5	0.7335
682	FAM83F	113828	0.7329	0.0124	family with sequence similarity 83, member F								FAM83F	0.7329
683	PPYR1	5540	0.7328	0.0169	pancreatic polypeptide receptor 1								PPYR1	0.7328
684	GFRA4	64096	0.7326	0.1738	GDNF family receptor alpha 4								GFRA4	0.7326
685	DLX4	1748	0.7323	0.0315	distal-less homeobox 4								DLX4	0.7323
686	TTLL10	254173	0.7321	0.107	tubulin tyrosine ligase-like family, member 10								TTLL10	0.7321
687	CCDC70	83446	0.7318	0.0952	coiled-coil domain containing 70								CCDC70	0.7318
688	SLC30A2	7780	0.7318	0.0746	solute carrier family 30 (zinc transporter), member 2								SLC30A2	0.7318
689	TRABD2B	388630	0.7317	0.0169	TraB domain containing 2B								TRABD2B	0.7317
690	MUC4	4585	0.7314	0.0082	mucin 4, cell surface associated								MUC4	0.7314
691	AQP8	343	0.7311	0.0457	aquaporin 8								AQP8	0.7311
692	CCDC153	283152	0.731	0.011	coiled-coil domain containing 153								CCDC153	0.731
693	GATA4	2626	0.7309	0.0341	GATA binding protein 4								GATA4	0.7309
694	LOC80054	80054	0.7308	0.1302	uncharacterized LOC80054								LOC80054	0.7308
695	MAP3K6	9064	0.7308	0.0398	mitogen-activated protein kinase kinase kinase 6								MAP3K6	0.7308
696	C1ORF35	79169	0.7306	0.0424	chromosome 1 open reading frame 35								C1ORF35	0.7306
697	ZNF335	63925	0.7306	0.0857	zinc finger protein 335								ZNF335	0.7306
698	DMRTA1	63951	0.7304	0.0108	DMRT-like family A1								DMRTA1	0.7304
699	AGXT	189	0.7301	0.0482	alanine-glyoxylate aminotransferase								AGXT	0.7301
700	GNB3	2784	0.7298	0.0592	guanine nucleotide binding protein (G protein), beta polypeptide 3								GNB3	0.7298
701	CCL21	6366	0.7296	0.0472	chemokine (C-C motif) ligand 21								CCL21	0.7296
702	WFIKKN1	117166	0.7295	0.0511	WAP, follistatin/kazal, immunoglobulin, kunitz and netrin domain containing 1								WFIKKN1	0.7295
703	ATAD3A	55210	0.7295	0.1073	ATPase family, AAA domain containing 3A								ATAD3A	0.7295
704	KRT15	3866	0.7295	0.0045	keratin 15								KRT15	0.7295
705	C19ORF26	255057	0.7293	0.1226	chromosome 19 open reading frame 26								C19ORF26	0.7293
706	SLC52A3	113278	0.7293	0.0348	solute carrier family 52, riboflavin transporter, member 3								SLC52A3	0.7293
707	ASCL2	430	0.7292	0.0041	achaete-scute complex homolog 2 (Drosophila)								ASCL2	0.7292
708	VENTX	27287	0.7292	0.0346	VENT homeobox								VENTX	0.7292
709	FCN2	2220	0.7292	0.0109	ficolin (collagen/fibrinogen domain containing lectin) 2 (hucolin)								FCN2	0.7292
710	LOC126536	126536	0.729	0.0229	uncharacterized LOC126536								LOC126536	0.729
711	C10ORF62	414157	0.7284	0.025	chromosome 10 open reading frame 62								C10ORF62	0.7284
712	TEX13B	56156	0.7284	0.1021	testis expressed 13B								TEX13B	0.7284
713	BMP8B	656	0.7283	0.0058	bone morphogenetic protein 8b								BMP8B	0.7283
714	MIA	8190	0.7283	0.005	melanoma inhibitory activity								MIA	0.7283
715	C17ORF99	100141515	0.7281	0.0026	chromosome 17 open reading frame 99								C17ORF99	0.7281
716	CCL27	10850	0.7277	0.0148	chemokine (C-C motif) ligand 27								CCL27	0.7277
717	CEACAM19	56971	0.7275	0.0559	carcinoembryonic antigen-related cell adhesion molecule 19								CEACAM19	0.7275
718	APOA1	335	0.7274	0.0505	apolipoprotein A-I								APOA1	0.7274
719	COL20A1	57642	0.726	0.0673	collagen, type XX, alpha 1								COL20A1	0.726
720	B3GNT6	192134	0.7258	0.0593	UDP-GlcNAc:betaGal beta-1,3-N-acetylglucosaminyltransferase 6 (core 3 synthase)								B3GNT6	0.7258
721	CALML5	51806	0.7256	0.006	calmodulin-like 5								CALML5	0.7256
722	NEU2	4759	0.7256	0.0351	sialidase 2 (cytosolic sialidase)								NEU2	0.7256
723	TPO	7173	0.7255	0.0129	thyroid peroxidase								TPO	0.7255
724	OXT	5020	0.7255	0.1061	oxytocin, prepropeptide								OXT	0.7255
725	TEKT5	146279	0.7254	0.0311	tektin 5								TEKT5	0.7254
726	ATF6B	1388	0.7253	0.0361	activating transcription factor 6 beta								ATF6B	0.7253
727	HR	55806	0.7248	0.114	hairless homolog (mouse)								HR	0.7248
728	ZNF219	51222	0.7246	0.0791	zinc finger protein 219								ZNF219	0.7246
729	KRT7	3855	0.724	0.0095	keratin 7								KRT7	0.724
730	VPS37D	155382	0.724	0.0571	vacuolar protein sorting 37 homolog D (S. cerevisiae)								VPS37D	0.724
731	PROM2	150696	0.7239	0.0159	prominin 2								PROM2	0.7239
732	IQCF6	440956	0.7238	0.0189	IQ motif containing F6								IQCF6	0.7238
733	C16ORF79	283870	0.7237	0.0264	chromosome 16 open reading frame 79								C16ORF79	0.7237
734	LOC149134	149134	0.7237	0.0147	uncharacterized LOC149134								LOC149134	0.7237
735	C19ORF81	342918	0.7233	0.0323	chromosome 19 open reading frame 81								C19ORF81	0.7233
736	SLC4A1	6521	0.7233	0.1112	solute carrier family 4, anion exchanger, member 1 (erythrocyte membrane protein band 3, Diego blood group)								SLC4A1	0.7233
737	AKT2	208	0.7231	0.0238	v-akt murine thymoma viral oncogene homolog 2								AKT2	0.7231
738	ANGPTL7	10218	0.7231	0.0054	angiopoietin-like 7								ANGPTL7	0.7231
739	PKDREJ	10343	0.723	0.0068	polycystic kidney disease (polycystin) and REJ homolog (sperm receptor for egg jelly homolog, sea urchin)								PKDREJ	0.723
740	SLC17A9	63910	0.7229	0.0233	solute carrier family 17, member 9								SLC17A9	0.7229
741	LOC90246	90246	0.7228	0.0116	uncharacterized LOC90246								LOC90246	0.7228
742	FAM71E2	284418	0.7228	0.0437	family with sequence similarity 71, member E2								FAM71E2	0.7228
743	BATF2	116071	0.7228	0.0193	basic leucine zipper transcription factor, ATF-like 2								BATF2	0.7228
744	RNF186	54546	0.7225	0.0135	ring finger protein 186								RNF186	0.7225
745	TSPAN9	10867	0.7224	0.0299	tetraspanin 9								TSPAN9	0.7224
746	TNK2	10188	0.7218	0.1262	tyrosine kinase, non-receptor, 2								TNK2	0.7218
747	KRT77	374454	0.7218	0.0036	keratin 77								KRT77	0.7218
748	TBKBP1	9755	0.7215	0.1049	TBK1 binding protein 1								TBKBP1	0.7215
749	OGFR	11054	0.7213	0.1313	opioid growth factor receptor								OGFR	0.7213
750	IGSF9B	22997	0.7211	0.0639	immunoglobulin superfamily, member 9B								IGSF9B	0.7211
751	SLC28A1	9154	0.7206	0.1465	solute carrier family 28 (sodium-coupled nucleoside transporter), member 1								SLC28A1	0.7206
752	NPW	283869	0.7206	0.0055	neuropeptide W								NPW	0.7206
753	GPR114	221188	0.7205	0.0174	G protein-coupled receptor 114								GPR114	0.7205
754	AQP2	359	0.7204	0.1464	aquaporin 2 (collecting duct)								AQP2	0.7204
755	C2ORF54	79919	0.7203	0.0049	chromosome 2 open reading frame 54								C2ORF54	0.7203
756	P2RY6	5031	0.7203	0.0211	pyrimidinergic receptor P2Y, G-protein coupled, 6								P2RY6	0.7203
757	CELA1	1990	0.7203	0.0235	chymotrypsin-like elastase family, member 1								CELA1	0.7203
758	FAT2	2196	0.7201	0.0085	FAT tumor suppressor homolog 2 (Drosophila)								FAT2	0.7201
759	SBSN	374897	0.72	0.0237	suprabasin								SBSN	0.72
760	MGC45922	284365	0.72	0.1476	uncharacterized LOC284365								MGC45922	0.72
761	A1BG-AS1	503538	0.7198	0.0323	A1BG antisense RNA 1 (non-protein coding)								A1BG-AS1	0.7198
762	SFTPC	6440	0.7197	0.198	surfactant protein C								SFTPC	0.7197
763	LIM2	3982	0.7197	0.0469	lens intrinsic membrane protein 2, 19kDa								LIM2	0.7197
764	ADAMTSL5	339366	0.7193	0.0615	ADAMTS-like 5								ADAMTSL5	0.7193
765	VRTN	55237	0.7192	0.086	vertebrae development homolog (pig)								VRTN	0.7192
766	PEX11G	92960	0.719	0.041	peroxisomal biogenesis factor 11 gamma								PEX11G	0.719
767	LAMC3	10319	0.7187	0.0345	laminin, gamma 3								LAMC3	0.7187
768	HSF4	3299	0.7186	0.1358	heat shock transcription factor 4								HSF4	0.7186
769	LINC00304	283860	0.7184	0.0342	long intergenic non-protein coding RNA 304								LINC00304	0.7184
770	CROCC	9696	0.7182	0.0442	ciliary rootlet coiled-coil, rootletin								CROCC	0.7182
771	NCR3	259197	0.7182	0.0756	natural cytotoxicity triggering receptor 3								NCR3	0.7182
772	GAST	2520	0.7182	0.0636	gastrin								GAST	0.7182
773	GPR20	2843	0.7181	0.0346	G protein-coupled receptor 20								GPR20	0.7181
774	RECQL4	9401	0.718	0.0988	RecQ protein-like 4								RECQL4	0.718
775	TRPM1	4308	0.718	0.0045	transient receptor potential cation channel, subfamily M, member 1								TRPM1	0.718
776	ECE2	9718	0.7179	0.1065	endothelin converting enzyme 2								ECE2	0.7179
777	QRICH2	84074	0.7179	0.0027	glutamine rich 2								QRICH2	0.7179
778	SPEG	10290	0.7178	0.0765	SPEG complex locus								SPEG	0.7178
779	ST14	6768	0.7177	0.0318	suppression of tumorigenicity 14 (colon carcinoma)								ST14	0.7177
780	HIC2	23119	0.7177	0.0203	hypermethylated in cancer 2								HIC2	0.7177
781	MGC12916	84815	0.7177	0.0128	uncharacterized protein MGC12916								MGC12916	0.7177
782	CPA1	1357	0.7176	0.0036	carboxypeptidase A1 (pancreatic)								CPA1	0.7176
783	PSAPL1	768239	0.7175	0.0935	prosaposin-like 1 (gene/pseudogene)								PSAPL1	0.7175
784	COL13A1	1305	0.7173	0.0187	collagen, type XIII, alpha 1								COL13A1	0.7173
785	NRG2	9542	0.7172	0.0208	neuregulin 2								NRG2	0.7172
786	LOC148696	148696	0.7171	0.0643	uncharacterized LOC148696								LOC148696	0.7171
787	SLC6A11	6538	0.7169	0.0476	solute carrier family 6 (neurotransmitter transporter, GABA), member 11								SLC6A11	0.7169
788	CRYBA2	1412	0.7167	0.0056	crystallin, beta A2								CRYBA2	0.7167
789	ANKRD24	170961	0.7166	0.1062	ankyrin repeat domain 24								ANKRD24	0.7166
790	PROC	5624	0.7166	0.0252	protein C (inactivator of coagulation factors Va and VIIIa)								PROC	0.7166
791	DOK2	9046	0.7165	0.0653	docking protein 2, 56kDa								DOK2	0.7165
792	P2RX3	5024	0.7165	0.0039	purinergic receptor P2X, ligand-gated ion channel, 3								P2RX3	0.7165
793	C20ORF118	140711	0.7165	0.0205	chromosome 20 open reading frame 118								C20ORF118	0.7165
794	UTF1	8433	0.7163	0.067	undifferentiated embryonic cell transcription factor 1								UTF1	0.7163
795	ABO	28	0.7155	0.0739	ABO blood group (transferase A, alpha 1-3-N-acetylgalactosaminyltransferase; transferase B, alpha 1-3-galactosyltransferase)								ABO	0.7155
796	PLCB3	5331	0.7153	0.0205	phospholipase C, beta 3 (phosphatidylinositol-specific)								PLCB3	0.7153
797	ABCC11	85320	0.7153	0.0063	ATP-binding cassette, sub-family C (CFTR/MRP), member 11								ABCC11	0.7153
798	RASAL3	64926	0.715	0.0504	RAS protein activator like 3								RASAL3	0.715
799	HOXD13	3239	0.7146	0.0282	homeobox D13								HOXD13	0.7146
800	C10ORF71	118461	0.7146	0.0497	chromosome 10 open reading frame 71								C10ORF71	0.7146
801	MYBPH	4608	0.7142	0.0882	myosin binding protein H								MYBPH	0.7142
802	ANKRD60	140731	0.714	0.0864	ankyrin repeat domain 60								ANKRD60	0.714
803	VPREB1	7441	0.7136	0.0022	pre-B lymphocyte 1								VPREB1	0.7136
804	MYH16	84176	0.7135	0.0162	myosin, heavy chain 16 pseudogene								MYH16	0.7135
805	PI16	221476	0.7132	0.0382	peptidase inhibitor 16								PI16	0.7132
806	SIX6	4990	0.7131	0.0322	SIX homeobox 6								SIX6	0.7131
807	PLD4	122618	0.713	0.0153	phospholipase D family, member 4								PLD4	0.713
808	MYH14	79784	0.713	0.1695	myosin, heavy chain 14, non-muscle								MYH14	0.713
809	TFR2	7036	0.713	0.0269	transferrin receptor 2								TFR2	0.713
810	ACSM1	116285	0.713	0.0032	acyl-CoA synthetase medium-chain family member 1								ACSM1	0.713
811	OSGIN1	29948	0.7129	0.0831	oxidative stress induced growth inhibitor 1								OSGIN1	0.7129
812	TCOF1	6949	0.7127	0.0941	Treacher Collins-Franceschetti syndrome 1								TCOF1	0.7127
813	ARMC7	79637	0.7126	0.0663	armadillo repeat containing 7								ARMC7	0.7126
814	SCN4A	6329	0.7126	0.0819	sodium channel, voltage-gated, type IV, alpha subunit								SCN4A	0.7126
815	ACRBP	84519	0.7124	0.0105	acrosin binding protein								ACRBP	0.7124
816	WNT7B	7477	0.7124	0.077	wingless-type MMTV integration site family, member 7B								WNT7B	0.7124
817	FLJ23867	200058	0.7124	0.0296	uncharacterized protein FLJ23867								FLJ23867	0.7124
818	TNNC1	7134	0.7122	0.0033	troponin C type 1 (slow)								TNNC1	0.7122
819	ASPG	374569	0.7119	0.1302	asparaginase homolog (S. cerevisiae)								ASPG	0.7119
820	C22ORF26	55267	0.7119	0.1268	chromosome 22 open reading frame 26								C22ORF26	0.7119
821	PRSS53	339105	0.7118	0.0447	protease, serine, 53								PRSS53	0.7118
822	DNAJB8	165721	0.7117	0.021	DnaJ (Hsp40) homolog, subfamily B, member 8								DNAJB8	0.7117
823	C19ORF80	55908	0.7112	0.0242	chromosome 19 open reading frame 80								C19ORF80	0.7112
824	PIDD	55367	0.7112	0.0726	p53-induced death domain protein								PIDD	0.7112
825	SLC22A18AS	5003	0.7112	0.0274	solute carrier family 22 (organic cation transporter), member 18 antisense								SLC22A18AS	0.7112
826	LOC389458	389458	0.7111	0.0534	uncharacterized LOC389458								LOC389458	0.7111
827	ESPNL	339768	0.7111	0.1053	espin-like								ESPNL	0.7111
828	SSX5	6758	0.711	0.0162	synovial sarcoma, X breakpoint 5								SSX5	0.711
829	TSSK6	83983	0.711	0.0533	testis-specific serine kinase 6								TSSK6	0.711
830	LTB4R	1241	0.7109	0.0351	leukotriene B4 receptor								LTB4R	0.7109
831	SPACA4	171169	0.7109	0.0375	sperm acrosome associated 4								SPACA4	0.7109
832	HS3ST6	64711	0.7108	0.0471	heparan sulfate (glucosamine) 3-O-sulfotransferase 6								HS3ST6	0.7108
833	SLFNL1	200172	0.7107	0.0351	schlafen-like 1								SLFNL1	0.7107
834	SLC6A3	6531	0.7106	0.0517	solute carrier family 6 (neurotransmitter transporter, dopamine), member 3								SLC6A3	0.7106
835	SPTBN4	57731	0.7105	0.1923	spectrin, beta, non-erythrocytic 4								SPTBN4	0.7105
836	ESRP2	80004	0.7104	0.0319	epithelial splicing regulatory protein 2								ESRP2	0.7104
837	PRRX2	51450	0.7101	0.0867	paired related homeobox 2								PRRX2	0.7101
838	GUCY2D	3000	0.7099	0.0307	guanylate cyclase 2D, membrane (retina-specific)								GUCY2D	0.7099
839	UPK3A	7380	0.7097	0.024	uroplakin 3A								UPK3A	0.7097
840	MZB1	51237	0.7096	0.0244	marginal zone B and B1 cell-specific protein								MZB1	0.7096
841	BARX2	8538	0.7095	0.0295	BARX homeobox 2								BARX2	0.7095
842	LBX1	10660	0.7094	0.05	ladybird homeobox 1								LBX1	0.7094
843	NAALADL1	10004	0.7087	0.0387	N-acetylated alpha-linked acidic dipeptidase-like 1								NAALADL1	0.7087
844	FBP2	8789	0.7086	0.033	fructose-1,6-bisphosphatase 2								FBP2	0.7086
845	DERL3	91319	0.7084	0.0257	derlin 3								DERL3	0.7084
846	STAC3	246329	0.7084	0.017	SH3 and cysteine rich domain 3								STAC3	0.7084
847	EPX	8288	0.7084	0.1139	eosinophil peroxidase								EPX	0.7084
848	C2CD4B	388125	0.7081	0.0512	C2 calcium-dependent domain containing 4B								C2CD4B	0.7081
849	FGF6	2251	0.708	0.1658	fibroblast growth factor 6								FGF6	0.708
850	TRBV10-2	28584	0.7079	0.1565	T cell receptor beta variable 10-2								TRBV10-2	0.7079
851	MNX1	3110	0.7079	0.0198	motor neuron and pancreas homeobox 1								MNX1	0.7079
852	CLDN7	1366	0.7079	0.0174	claudin 7								CLDN7	0.7079
853	DCDC2B	149069	0.7079	0.1054	doublecortin domain containing 2B								DCDC2B	0.7079
854	C1ORF126	200197	0.7078	0.0255	chromosome 1 open reading frame 126								C1ORF126	0.7078
855	LENG9	94059	0.7074	0.018	leukocyte receptor cluster (LRC) member 9								LENG9	0.7074
856	SUSD2	56241	0.7074	0.022	sushi domain containing 2								SUSD2	0.7074
857	DUSP13	51207	0.7073	0.0499	dual specificity phosphatase 13								DUSP13	0.7073
858	SERPINA10	51156	0.7072	0.0262	serpin peptidase inhibitor, clade A (alpha-1 antiproteinase, antitrypsin), member 10								SERPINA10	0.7072
859	MYO7A	4647	0.7071	0.0885	myosin VIIA								MYO7A	0.7071
860	C8G	733	0.7066	0.0026	complement component 8, gamma polypeptide								C8G	0.7066
861	SULT2B1	6820	0.7063	0.0547	sulfotransferase family, cytosolic, 2B, member 1								SULT2B1	0.7063
862	RXFP3	51289	0.7063	0.0404	relaxin/insulin-like family peptide receptor 3								RXFP3	0.7063
863	PTH2	113091	0.706	0.1152	parathyroid hormone 2								PTH2	0.706
864	CARD9	64170	0.706	0.0147	caspase recruitment domain family, member 9								CARD9	0.706
865	GJA3	2700	0.7058	0.0119	gap junction protein, alpha 3, 46kDa								GJA3	0.7058
866	WNT3	7473	0.7054	0.0268	wingless-type MMTV integration site family, member 3								WNT3	0.7054
867	GCNT3	9245	0.7052	0.0098	glucosaminyl (N-acetyl) transferase 3, mucin type								GCNT3	0.7052
868	CLDN19	149461	0.7051	0.1221	claudin 19								CLDN19	0.7051
869	GIPR	2696	0.7049	0.1497	gastric inhibitory polypeptide receptor								GIPR	0.7049
870	CRYGC	1420	0.7049	0.0991	crystallin, gamma C								CRYGC	0.7049
871	SFRP5	6425	0.7046	0.0441	secreted frizzled-related protein 5								SFRP5	0.7046
872	RPS6KB2	6199	0.7045	0.0906	ribosomal protein S6 kinase, 70kDa, polypeptide 2								RPS6KB2	0.7045
873	DOK1	1796	0.7045	0.0416	docking protein 1, 62kDa (downstream of tyrosine kinase 1)								DOK1	0.7045
874	C1ORF116	79098	0.7044	0.0327	chromosome 1 open reading frame 116								C1ORF116	0.7044
875	LOC100128511	100128511	0.7035	0.0317	uncharacterized LOC100128511								LOC100128511	0.7035
876	ALX4	60529	0.7035	0.0527	ALX homeobox 4								ALX4	0.7035
877	TLX1	3195	0.7035	0.028	T-cell leukemia homeobox 1								TLX1	0.7035
878	KIF25	3834	0.7034	0.0498	kinesin family member 25								KIF25	0.7034
879	MIRLET7BHG	400931	0.703	0.0241	MIRLET7B host gene (non-protein coding)								MIRLET7BHG	0.703
880	SLC22A8	9376	0.7029	0.1569	solute carrier family 22 (organic anion transporter), member 8								SLC22A8	0.7029
881	SH2D3A	10045	0.7027	0.0172	SH2 domain containing 3A								SH2D3A	0.7027
882	SERPINF2	5345	0.7025	0.0312	serpin peptidase inhibitor, clade F (alpha-2 antiplasmin, pigment epithelium derived factor), member 2								SERPINF2	0.7025
883	ZNF252P-AS1	286103	0.7022	0.0047	ZNF252P antisense RNA 1 (non-protein coding)								ZNF252P-AS1	0.7022
884	GYLTL1B	120071	0.7021	0.0246	glycosyltransferase-like 1B								GYLTL1B	0.7021
885	ARHGAP4	393	0.7021	0.0602	Rho GTPase activating protein 4								ARHGAP4	0.7021
886	PRR15	222171	0.7019	0.0063	proline rich 15								PRR15	0.7019
887	MYH6	4624	0.7019	0.0049	myosin, heavy chain 6, cardiac muscle, alpha								MYH6	0.7019
888	RNF126P1	376412	0.7018	0.0913	ring finger protein 126 pseudogene 1								RNF126P1	0.7018
889	SOX1	6656	0.7016	0.0514	SRY (sex determining region Y)-box 1								SOX1	0.7016
890	SLC7A4	6545	0.7016	0.1207	solute carrier family 7 (orphan transporter), member 4								SLC7A4	0.7016
891	TACR2	6865	0.7011	0.1392	tachykinin receptor 2								TACR2	0.7011
892	CRB3	92359	0.7011	0.0576	crumbs homolog 3 (Drosophila)								CRB3	0.7011
893	FOXN4	121643	0.7011	0.1269	forkhead box N4								FOXN4	0.7011
894	PAX8	7849	0.701	0.1732	paired box 8								PAX8	0.701
895	SH2D6	284948	0.701	0.0094	SH2 domain containing 6								SH2D6	0.701
896	IL22RA1	58985	0.7009	0.0143	interleukin 22 receptor, alpha 1								IL22RA1	0.7009
897	PRICKLE3	4007	0.7009	0.0483	prickle homolog 3 (Drosophila)								PRICKLE3	0.7009
898	MCF2L-AS1	100289410	0.7008	0.0114	MCF2L antisense RNA 1 (non-protein coding)								MCF2L-AS1	0.7008
899	HSD17B1	3292	0.7007	0.0053	hydroxysteroid (17-beta) dehydrogenase 1								HSD17B1	0.7007
900	SLC25A41	284427	0.7006	0.0043	solute carrier family 25, member 41								SLC25A41	0.7006
901	PNLIP	5406	0.7006	0.0087	pancreatic lipase								PNLIP	0.7006
902	SLC22A13	9390	0.7004	0.0762	solute carrier family 22 (organic anion transporter), member 13								SLC22A13	0.7004
903	KCNJ14	3770	0.7002	0.0217	potassium inwardly-rectifying channel, subfamily J, member 14								KCNJ14	0.7002
904	MAT1A	4143	0.7001	0.1083	methionine adenosyltransferase I, alpha								MAT1A	0.7001
905	OR2H2	7932	0.7	0.014	olfactory receptor, family 2, subfamily H, member 2								OR2H2	0.7
906	GFER	2671	0.7	0.0749	growth factor, augmenter of liver regeneration								GFER	0.7
907	NLRP6	171389	0.6999	0.0026	NLR family, pyrin domain containing 6								NLRP6	0.6999
908	WNT8B	7479	0.6994	0.0471	wingless-type MMTV integration site family, member 8B								WNT8B	0.6994
909	CDH22	64405	0.6994	0.0803	cadherin 22, type 2								CDH22	0.6994
910	CLEC4M	10332	0.6992	0.1021	C-type lectin domain family 4, member M								CLEC4M	0.6992
911	ESRRA	2101	0.699	0.0701	estrogen-related receptor alpha								ESRRA	0.699
912	DNAH9	1770	0.699	0.1183	dynein, axonemal, heavy chain 9								DNAH9	0.699
913	CILP2	148113	0.6989	0.0536	cartilage intermediate layer protein 2								CILP2	0.6989
914	CCDC64B	146439	0.6989	0.0416	coiled-coil domain containing 64B								CCDC64B	0.6989
915	FOXJ1	2302	0.6986	0.0787	forkhead box J1								FOXJ1	0.6986
916	SCNN1B	6338	0.6984	0.0237	sodium channel, non-voltage-gated 1, beta subunit								SCNN1B	0.6984
917	CSH2	1443	0.6981	0.0273	chorionic somatomammotropin hormone 2								CSH2	0.6981
918	CRP	1401	0.6981	0.0676	C-reactive protein, pentraxin-related								CRP	0.6981
919	LYZL4	131375	0.6981	0.0379	lysozyme-like 4								LYZL4	0.6981
920	TIFAB	497189	0.698	0.0343	TRAF-interacting protein with forkhead-associated domain, family member B								TIFAB	0.698
921	GSDMD	79792	0.6977	0.0616	gasdermin D								GSDMD	0.6977
922	PCP2	126006	0.6975	0.0172	Purkinje cell protein 2								PCP2	0.6975
923	TPD52L3	89882	0.6974	0.0541	tumor protein D52-like 3								TPD52L3	0.6974
924	PRSS36	146547	0.6969	0.0886	protease, serine, 36								PRSS36	0.6969
925	CDHR2	54825	0.6968	0.0561	cadherin-related family member 2								CDHR2	0.6968
926	C11ORF16	56673	0.6967	0.1702	chromosome 11 open reading frame 16								C11ORF16	0.6967
927	HTR7	3363	0.6966	0.0547	5-hydroxytryptamine (serotonin) receptor 7, adenylate cyclase-coupled								HTR7	0.6966
928	VWA3A	146177	0.6963	0.1446	von Willebrand factor A domain containing 3A								VWA3A	0.6963
929	MUC16	94025	0.6962	0.0032	mucin 16, cell surface associated								MUC16	0.6962
930	NAPSA	9476	0.6961	0.0418	napsin A aspartic peptidase								NAPSA	0.6961
931	FAM83H	286077	0.6961	0.0383	family with sequence similarity 83, member H								FAM83H	0.6961
932	TNFRSF8	943	0.6959	0.0229	tumor necrosis factor receptor superfamily, member 8								TNFRSF8	0.6959
933	KCNK5	8645	0.6959	0.0044	potassium channel, subfamily K, member 5								KCNK5	0.6959
934	PDZD3	79849	0.6958	0.123	PDZ domain containing 3								PDZD3	0.6958
935	PHLDB3	653583	0.6957	0.0344	pleckstrin homology-like domain, family B, member 3								PHLDB3	0.6957
936	RHOD	29984	0.6953	0.0761	ras homolog family member D								RHOD	0.6953
937	AMBP	259	0.6952	0.0088	alpha-1-microglobulin/bikunin precursor								AMBP	0.6952
938	EXD3	54932	0.6951	0.0302	exonuclease 3'-5' domain containing 3								EXD3	0.6951
939	LCN1	3933	0.6951	0.0154	lipocalin 1								LCN1	0.6951
940	HK3	3101	0.6947	0.0753	hexokinase 3 (white cell)								HK3	0.6947
941	TBXA2R	6915	0.6945	0.1085	thromboxane A2 receptor								TBXA2R	0.6945
942	COL17A1	1308	0.6945	0.0156	collagen, type XVII, alpha 1								COL17A1	0.6945
943	FATE1	89885	0.6945	0.0261	fetal and adult testis expressed 1								FATE1	0.6945
944	CHRDL2	25884	0.6944	0.0243	chordin-like 2								CHRDL2	0.6944
945	PROCA1	147011	0.6944	0.051	protein interacting with cyclin A1								PROCA1	0.6944
946	GATA5	140628	0.6944	0.0381	GATA binding protein 5								GATA5	0.6944
947	OBP2B	29989	0.6942	0.0054	odorant binding protein 2B								OBP2B	0.6942
948	NLRP7	199713	0.6941	0.0017	NLR family, pyrin domain containing 7								NLRP7	0.6941
949	ACTL7B	10880	0.6941	0.0382	actin-like 7B								ACTL7B	0.6941
950	DHRS7C	201140	0.694	0.0385	dehydrogenase/reductase (SDR family) member 7C								DHRS7C	0.694
951	BTNL3	10917	0.6938	0.1314	butyrophilin-like 3								BTNL3	0.6938
952	SLC12A3	6559	0.6936	0.1331	solute carrier family 12 (sodium/chloride transporters), member 3								SLC12A3	0.6936
953	MMP25	64386	0.6935	0.0794	matrix metallopeptidase 25								MMP25	0.6935
954	NHLH1	4807	0.6934	0.1127	nescient helix loop helix 1								NHLH1	0.6934
955	F11	2160	0.6928	0.0432	coagulation factor XI								F11	0.6928
956	KIF7	374654	0.6927	0.0242	kinesin family member 7								KIF7	0.6927
957	ASPDH	554235	0.6926	0.0708	aspartate dehydrogenase domain containing								ASPDH	0.6926
958	FAM187B	148109	0.6925	0.0215	family with sequence similarity 187, member B								FAM187B	0.6925
959	FOLR3	2352	0.6924	0.0184	folate receptor 3 (gamma)								FOLR3	0.6924
960	SYDE1	85360	0.6923	0.1705	synapse defective 1, Rho GTPase, homolog 1 (C. elegans)								SYDE1	0.6923
961	KDM6B	23135	0.6923	0.0899	lysine (K)-specific demethylase 6B								KDM6B	0.6923
962	CCL17	6361	0.6921	0.0964	chemokine (C-C motif) ligand 17								CCL17	0.6921
963	KRTAP1-1	81851	0.6918	0.0492	keratin associated protein 1-1								KRTAP1-1	0.6918
964	LMAN1L	79748	0.6916	0.1306	lectin, mannose-binding, 1 like								LMAN1L	0.6916
965	RORC	6097	0.6916	0.043	RAR-related orphan receptor C								RORC	0.6916
966	ESR2	2100	0.6916	0.1049	estrogen receptor 2 (ER beta)								ESR2	0.6916
967	INGX	27160	0.6916	0.0134	inhibitor of growth family, X-linked, pseudogene								INGX	0.6916
968	SPINT1	6692	0.6912	0.0395	serine peptidase inhibitor, Kunitz type 1								SPINT1	0.6912
969	C14ORF64	388011	0.6912	0	chromosome 14 open reading frame 64								C14ORF64	0.6912
970	FAM106A	80039	0.6912	0.0086	family with sequence similarity 106, member A								FAM106A	0.6912
971	SPNS3	201305	0.6908	0.0292	spinster homolog 3 (Drosophila)								SPNS3	0.6908
972	ZNF696	79943	0.6907	0.0426	zinc finger protein 696								ZNF696	0.6907
973	CTLA4	1493	0.6906	0.0383	cytotoxic T-lymphocyte-associated protein 4								CTLA4	0.6906
974	HOXC8	3224	0.6905	0.0649	homeobox C8								HOXC8	0.6905
975	BATF	10538	0.6905	0.0384	basic leucine zipper transcription factor, ATF-like								BATF	0.6905
976	GPR55	9290	0.6905	0.04	G protein-coupled receptor 55								GPR55	0.6905
977	LILRA5	353514	0.6902	0.0421	leukocyte immunoglobulin-like receptor, subfamily A (with TM domain), member 5								LILRA5	0.6902
978	TBX2	6909	0.6898	0.0976	T-box 2								TBX2	0.6898
979	NLRP12	91662	0.6898	0.0433	NLR family, pyrin domain containing 12								NLRP12	0.6898
980	C20ORF144	128864	0.6898	0.0407	chromosome 20 open reading frame 144								C20ORF144	0.6898
981	LOC339352	339352	0.6895	0.0379	cytosolic thiouridylase subunit 1 homolog (S. pombe) pseudogene								LOC339352	0.6895
982	LOC100289509	100289509	0.6894	0	uncharacterized LOC100289509								LOC100289509	0.6894
983	CCDC57	284001	0.6894	0.0339	coiled-coil domain containing 57								CCDC57	0.6894
984	MESP2	145873	0.6893	0.1761	mesoderm posterior 2 homolog (mouse)								MESP2	0.6893
985	PRKACG	5568	0.6891	0.1155	protein kinase, cAMP-dependent, catalytic, gamma								PRKACG	0.6891
986	SCNN1A	6337	0.6889	0.0505	sodium channel, non-voltage-gated 1 alpha subunit								SCNN1A	0.6889
987	HES2	54626	0.6889	0.0338	hairy and enhancer of split 2 (Drosophila)								HES2	0.6889
988	LOC388882	388882	0.6887	0.0767	uncharacterized LOC388882								LOC388882	0.6887
989	LOC100128881	100128881	0.6886	0	uncharacterized LOC100128881								LOC100128881	0.6886
990	GALR2	8811	0.6882	0.0263	galanin receptor 2								GALR2	0.6882
991	VPS13A-AS1	100286938	0.6882	0	VPS13A antisense RNA 1 (non-protein coding)								VPS13A-AS1	0.6882
992	FZD8	8325	0.6881	0.0063	frizzled family receptor 8								FZD8	0.6881
993	YIPF2	78992	0.688	0.1198	Yip1 domain family, member 2								YIPF2	0.688
994	LINC00202	387644	0.688	0.0343	long intergenic non-protein coding RNA 202								LINC00202	0.688
995	ACPT	93650	0.6871	0.0786	acid phosphatase, testicular								ACPT	0.6871
996	PPP1R3F	89801	0.6871	0.0981	protein phosphatase 1, regulatory subunit 3F								PPP1R3F	0.6871
997	CHRND	1144	0.6871	0.1574	cholinergic receptor, nicotinic, delta (muscle)								CHRND	0.6871
998	SIGLEC8	27181	0.687	0.1437	sialic acid binding Ig-like lectin 8								SIGLEC8	0.687
999	PLA2G3	50487	0.6867	0.0735	phospholipase A2, group III								PLA2G3	0.6867
1000	WBSCR28	135886	0.6866	0.0124	Williams-Beuren syndrome chromosome region 28								WBSCR28	0.6866
1001	OR1F2P	26184	0.6864	0.0312	olfactory receptor, family 1, subfamily F, member 2								OR1F2P	0.6864
1002	KCNE1	3753	0.6863	0.0358	potassium voltage-gated channel, Isk-related family, member 1								KCNE1	0.6863
1003	ATP8B3	148229	0.686	0.0455	ATPase, aminophospholipid transporter, class I, type 8B, member 3								ATP8B3	0.686
1004	WNT1	7471	0.6859	0.0465	wingless-type MMTV integration site family, member 1								WNT1	0.6859
1005	ART1	417	0.6859	0.1444	ADP-ribosyltransferase 1								ART1	0.6859
1006	NANOS3	342977	0.6857	0.0944	nanos homolog 3 (Drosophila)								NANOS3	0.6857
1007	S100A5	6276	0.6856	0.0384	S100 calcium binding protein A5								S100A5	0.6856
1008	NEURL3	93082	0.6855	0.0334	neuralized homolog 3 (Drosophila) pseudogene								NEURL3	0.6855
1009	RAB3IL1	5866	0.6855	0.1807	RAB3A interacting protein (rabin3)-like 1								RAB3IL1	0.6855
1010	REG3A	5068	0.6852	0.0139	regenerating islet-derived 3 alpha								REG3A	0.6852
1011	LOC100190938	100190938	0.6851	0.015	uncharacterized LOC100190938								LOC100190938	0.6851
1012	LPIN3	64900	0.685	0.0593	lipin 3								LPIN3	0.685
1013	TRIM54	57159	0.685	0.0124	tripartite motif containing 54								TRIM54	0.685
1014	DRD4	1815	0.6846	0.0602	dopamine receptor D4								DRD4	0.6846
1015	B9D2	80776	0.6845	0.046	B9 protein domain 2								B9D2	0.6845
1016	TFAP2B	7021	0.6845	0.0294	transcription factor AP-2 beta (activating enhancer binding protein 2 beta)								TFAP2B	0.6845
1017	BMP1	649	0.6845	0.1375	bone morphogenetic protein 1								BMP1	0.6845
1018	TFF2	7032	0.6844	0.0425	trefoil factor 2								TFF2	0.6844
1019	ABCC3	8714	0.6842	0.0355	ATP-binding cassette, sub-family C (CFTR/MRP), member 3								ABCC3	0.6842
1020	NR0B2	8431	0.6842	0.0803	nuclear receptor subfamily 0, group B, member 2								NR0B2	0.6842
1021	FOXC2	2303	0.6842	0.1281	forkhead box C2 (MFH-1, mesenchyme forkhead 1)								FOXC2	0.6842
1022	XCR1	2829	0.6841	0.054	chemokine (C motif) receptor 1								XCR1	0.6841
1023	OR10C1	442194	0.6839	0.1099	olfactory receptor, family 10, subfamily C, member 1								OR10C1	0.6839
1024	DGKQ	1609	0.6838	0.0477	diacylglycerol kinase, theta 110kDa								DGKQ	0.6838
1025	CLDN4	1364	0.6838	0.0286	claudin 4								CLDN4	0.6838
1026	IL1RN	3557	0.6837	0.0695	interleukin 1 receptor antagonist								IL1RN	0.6837
1027	PRDM11	56981	0.6834	0.1369	PR domain containing 11								PRDM11	0.6834
1028	KANK3	256949	0.6834	0.0954	KN motif and ankyrin repeat domains 3								KANK3	0.6834
1029	BCL6B	255877	0.6833	0.083	B-cell CLL/lymphoma 6, member B								BCL6B	0.6833
1030	PIGQ	9091	0.6831	0.123	phosphatidylinositol glycan anchor biosynthesis, class Q								PIGQ	0.6831
1031	LILRA4	23547	0.6831	0.0468	leukocyte immunoglobulin-like receptor, subfamily A (with TM domain), member 4								LILRA4	0.6831
1032	ALS2CL	259173	0.683	0.1217	ALS2 C-terminal like								ALS2CL	0.683
1033	COMP	1311	0.6829	0.0241	cartilage oligomeric matrix protein								COMP	0.6829
1034	TNP1	7141	0.6827	0.0533	transition protein 1 (during histone to protamine replacement)								TNP1	0.6827
1035	HOXD9	3235	0.6827	0.039	homeobox D9								HOXD9	0.6827
1036	ELL	8178	0.6825	0.0814	elongation factor RNA polymerase II								ELL	0.6825
1037	CATSPERG	57828	0.6825	0.1032	catsper channel auxiliary subunit gamma								CATSPERG	0.6825
1038	LY6G6F	259215	0.6824	0.0181	lymphocyte antigen 6 complex, locus G6F								LY6G6F	0.6824
1039	NAT8B	51471	0.6824	0.009	N-acetyltransferase 8B (GCN5-related, putative, gene/pseudogene)								NAT8B	0.6824
1040	SNHG7	84973	0.6823	0.0223	small nucleolar RNA host gene 7 (non-protein coding)								SNHG7	0.6823
1041	PAGE4	9506	0.6821	0.0117	P antigen family, member 4 (prostate associated)								PAGE4	0.6821
1042	REG1P	5969	0.6818	0.1181	regenerating islet-derived 1 pseudogene								REG1P	0.6818
1043	HOXC12	3228	0.6817	0.0184	homeobox C12								HOXC12	0.6817
1044	IGDCC3	9543	0.6815	0.0851	immunoglobulin superfamily, DCC subclass, member 3								IGDCC3	0.6815
1045	UBTD1	80019	0.6813	0.1094	ubiquitin domain containing 1								UBTD1	0.6813
1046	SYTL1	84958	0.6811	0.0311	synaptotagmin-like 1								SYTL1	0.6811
1047	RHCG	51458	0.681	0.0225	Rh family, C glycoprotein								RHCG	0.681
1048	CARD10	29775	0.6807	0.0209	caspase recruitment domain family, member 10								CARD10	0.6807
1049	CDKN2A	1029	0.6803	0.0063	cyclin-dependent kinase inhibitor 2A								CDKN2A	0.6803
1050	ESPN	83715	0.6802	0.0486	espin								ESPN	0.6802
1051	PRAM1	84106	0.6801	0.06	PML-RARA regulated adaptor molecule 1								PRAM1	0.6801
1052	GPRIN2	9721	0.68	0.0158	G protein regulated inducer of neurite outgrowth 2								GPRIN2	0.68
1053	ONECUT3	390874	0.68	0.0676	one cut homeobox 3								ONECUT3	0.68
1054	SPDEF	25803	0.68	0.1782	SAM pointed domain containing ets transcription factor								SPDEF	0.68
1055	RIPK4	54101	0.6798	0.0173	receptor-interacting serine-threonine kinase 4								RIPK4	0.6798
1056	ACOT11	26027	0.6798	0.0384	acyl-CoA thioesterase 11								ACOT11	0.6798
1057	FUT3	2525	0.6798	0.0637	fucosyltransferase 3 (galactoside 3(4)-L-fucosyltransferase, Lewis blood group)								FUT3	0.6798
1058	MYL7	58498	0.6797	0.0715	myosin, light chain 7, regulatory								MYL7	0.6797
1059	SIGLEC9	27180	0.6796	0.0984	sialic acid binding Ig-like lectin 9								SIGLEC9	0.6796
1060	DHH	50846	0.6795	0.0554	desert hedgehog								DHH	0.6795
1061	PRDM12	59335	0.6792	0.0684	PR domain containing 12								PRDM12	0.6792
1062	ZNF324B	388569	0.6788	0.0572	zinc finger protein 324B								ZNF324B	0.6788
1063	DEFB1	1672	0.6788	0.0077	defensin, beta 1								DEFB1	0.6788
1064	CD209	30835	0.6786	0.1495	CD209 molecule								CD209	0.6786
1065	PVRL1	5818	0.6781	0.2256	poliovirus receptor-related 1 (herpesvirus entry mediator C)								PVRL1	0.6781
1066	FOXS1	2307	0.6781	0.0358	forkhead box S1								FOXS1	0.6781
1067	IBSP	3381	0.678	0.0284	integrin-binding sialoprotein								IBSP	0.678
1068	RDH16	8608	0.6779	0.1286	retinol dehydrogenase 16 (all-trans)								RDH16	0.6779
1069	CEL	1056	0.6778	0.0159	carboxyl ester lipase (bile salt-stimulated lipase)								CEL	0.6778
1070	SLC16A8	23539	0.6777	0.1122	solute carrier family 16, member 8 (monocarboxylic acid transporter 3)								SLC16A8	0.6777
1071	TMEM239	100288797	0.6774	0.1105	transmembrane protein 239								TMEM239	0.6774
1072	OR3A3	8392	0.6774	0.0603	olfactory receptor, family 3, subfamily A, member 3								OR3A3	0.6774
1073	HILS1	373861	0.6773	0.0408	histone linker H1 domain, spermatid-specific 1, pseudogene								HILS1	0.6773
1074	RHAG	6005	0.6771	0.1111	Rh-associated glycoprotein								RHAG	0.6771
1075	HOXB8	3218	0.6769	0.0074	homeobox B8								HOXB8	0.6769
1076	CALML6	163688	0.6769	0.0061	calmodulin-like 6								CALML6	0.6769
1077	KCNA10	3744	0.6768	0.0422	potassium voltage-gated channel, shaker-related subfamily, member 10								KCNA10	0.6768
1078	AGRP	181	0.6761	0.082	agouti related protein homolog (mouse)								AGRP	0.6761
1079	EVI5L	115704	0.676	0.1442	ecotropic viral integration site 5-like								EVI5L	0.676
1080	CCDC108	255101	0.6758	0.0488	coiled-coil domain containing 108								CCDC108	0.6758
1081	SUN5	140732	0.6756	0.1061	Sad1 and UNC84 domain containing 5								SUN5	0.6756
1082	TSSK2	23617	0.6756	0.0691	testis-specific serine kinase 2								TSSK2	0.6756
1083	HIST1H4G	8369	0.6755	0.0132	histone cluster 1, H4g								HIST1H4G	0.6755
1084	IQCF2	389123	0.6754	0.019	IQ motif containing F2								IQCF2	0.6754
1085	KCND3	3752	0.6754	0.1844	potassium voltage-gated channel, Shal-related subfamily, member 3								KCND3	0.6754
1086	LILRA2	11027	0.6754	0.0829	leukocyte immunoglobulin-like receptor, subfamily A (with TM domain), member 2								LILRA2	0.6754
1087	CLDND2	125875	0.6752	0.0314	claudin domain containing 2								CLDND2	0.6752
1088	ZDHHC8P1	150244	0.6749	0.0323	zinc finger, DHHC-type containing 8 pseudogene 1								ZDHHC8P1	0.6749
1089	CACNG1	786	0.6737	0.1264	calcium channel, voltage-dependent, gamma subunit 1								CACNG1	0.6737
1090	GP9	2815	0.6737	0.1304	glycoprotein IX (platelet)								GP9	0.6737
1091	ALX3	257	0.6736	0.0146	ALX homeobox 3								ALX3	0.6736
1092	HMHB1	57824	0.6736	0.0234	histocompatibility (minor) HB-1								HMHB1	0.6736
1093	TMEM102	284114	0.6735	0.0348	transmembrane protein 102								TMEM102	0.6735
1094	AVPR1A	552	0.6734	0.1064	arginine vasopressin receptor 1A								AVPR1A	0.6734
1095	UROC1	131669	0.6734	0.0129	urocanase domain containing 1								UROC1	0.6734
1096	HRASLS2	54979	0.673	0.017	HRAS-like suppressor 2								HRASLS2	0.673
1097	DLEC1	9940	0.6727	0.1879	deleted in lung and esophageal cancer 1								DLEC1	0.6727
1098	TSPAN10	83882	0.6722	0.0328	tetraspanin 10								TSPAN10	0.6722
1099	NCOR2	9612	0.6722	0.1226	nuclear receptor corepressor 2								NCOR2	0.6722
1100	GHSR	2693	0.6718	0.1185	growth hormone secretagogue receptor								GHSR	0.6718
1101	EPN1	29924	0.6715	0.183	epsin 1								EPN1	0.6715
1102	LGALS8-AS1	100287902	0.6715	0.0946	LGALS8 antisense RNA 1 (non-protein coding)								LGALS8-AS1	0.6715
1103	C1QTNF6	114904	0.6715	0.0321	C1q and tumor necrosis factor related protein 6								C1QTNF6	0.6715
1104	LY6G6D	58530	0.6713	0.0652	lymphocyte antigen 6 complex, locus G6D								LY6G6D	0.6713
1105	GPC2	221914	0.6712	0.0411	glypican 2								GPC2	0.6712
1106	FOXD3	27022	0.6712	0.0308	forkhead box D3								FOXD3	0.6712
1107	CCDC134	79879	0.6711	0.075	coiled-coil domain containing 134								CCDC134	0.6711
1108	ARFRP1	10139	0.671	0.0863	ADP-ribosylation factor related protein 1								ARFRP1	0.671
1109	FXYD2	486	0.671	0.0422	FXYD domain containing ion transport regulator 2								FXYD2	0.671
1110	C3ORF43	255798	0.671	0.0741	chromosome 3 open reading frame 43								C3ORF43	0.671
1111	RETNLB	84666	0.6709	0.058	resistin like beta								RETNLB	0.6709
1112	ZNF771	51333	0.6708	0.1	zinc finger protein 771								ZNF771	0.6708
1113	CAPN10	11132	0.6707	0.0724	calpain 10								CAPN10	0.6707
1114	HOXA6	3203	0.6705	0.0179	homeobox A6								HOXA6	0.6705
1115	RBP2	5948	0.6705	0.0104	retinol binding protein 2, cellular								RBP2	0.6705
1116	KLK15	55554	0.6704	0.0859	kallikrein-related peptidase 15								KLK15	0.6704
1117	CYP11A1	1583	0.6702	0.0031	cytochrome P450, family 11, subfamily A, polypeptide 1								CYP11A1	0.6702
1118	SERPINA4	5267	0.6701	0.1311	serpin peptidase inhibitor, clade A (alpha-1 antiproteinase, antitrypsin), member 4								SERPINA4	0.6701
1119	MAGEA10	4109	0.6701	0.0318	melanoma antigen family A, 10								MAGEA10	0.6701
1120	OSTM1-AS1	100287366	0.67	0	OSTM1 antisense RNA 1 (non-protein coding)								OSTM1-AS1	0.67
1121	PAX9	5083	0.6698	0.0143	paired box 9								PAX9	0.6698
1122	FAM83C	128876	0.6697	0.0106	family with sequence similarity 83, member C								FAM83C	0.6697
1123	C20ORF166	128826	0.6695	0.0612	chromosome 20 open reading frame 166								C20ORF166	0.6695
1124	CYP4F12	66002	0.6695	0.0562	cytochrome P450, family 4, subfamily F, polypeptide 12								CYP4F12	0.6695
1125	RHO	6010	0.6695	0.2233	rhodopsin								RHO	0.6695
1126	ATF5	22809	0.6695	0.0277	activating transcription factor 5								ATF5	0.6695
1127	FAM71A	149647	0.6695	0.0863	family with sequence similarity 71, member A								FAM71A	0.6695
1128	CCNJL	79616	0.6694	0.0176	cyclin J-like								CCNJL	0.6694
1129	INSL3	3640	0.6694	0.1679	insulin-like 3 (Leydig cell)								INSL3	0.6694
1130	FGFRL1	53834	0.6694	0.0486	fibroblast growth factor receptor-like 1								FGFRL1	0.6694
1131	TTC16	158248	0.6694	0.0205	tetratricopeptide repeat domain 16								TTC16	0.6694
1132	CD70	970	0.6693	0.0171	CD70 molecule								CD70	0.6693
1133	NANOS2	339345	0.6692	0.0539	nanos homolog 2 (Drosophila)								NANOS2	0.6692
1134	DPEP3	64180	0.6692	0.0672	dipeptidase 3								DPEP3	0.6692
1135	VPREB3	29802	0.6692	0.0252	pre-B lymphocyte 3								VPREB3	0.6692
1136	P4HA3	283208	0.669	0.05	prolyl 4-hydroxylase, alpha polypeptide III								P4HA3	0.669
1137	AIPL1	23746	0.669	0.1122	aryl hydrocarbon receptor interacting protein-like 1								AIPL1	0.669
1138	NGB	58157	0.6689	0.1196	neuroglobin								NGB	0.6689
1139	ZNF787	126208	0.6689	0.1127	zinc finger protein 787								ZNF787	0.6689
1140	MGAT3	4248	0.6688	0.1605	mannosyl (beta-1,4-)-glycoprotein beta-1,4-N-acetylglucosaminyltransferase								MGAT3	0.6688
1141	PCSK9	255738	0.6685	0.0127	proprotein convertase subtilisin/kexin type 9								PCSK9	0.6685
1142	LOC283867	283867	0.6684	0.0723	uncharacterized LOC283867								LOC283867	0.6684
1143	PAX3	5077	0.668	0.1431	paired box 3								PAX3	0.668
1144	ODF3B	440836	0.668	0.0652	outer dense fiber of sperm tails 3B								ODF3B	0.668
1145	LOC144486	144486	0.6677	0.0247	uncharacterized LOC144486								LOC144486	0.6677
1146	PHF2P1	266695	0.6676	0	PHD finger protein 2 pseudogene 1								PHF2P1	0.6676
1147	CCDC114	93233	0.6676	0.0298	coiled-coil domain containing 114								CCDC114	0.6676
1148	FASLG	356	0.6675	0.0697	Fas ligand (TNF superfamily, member 6)								FASLG	0.6675
1149	LAT	27040	0.6675	0.0482	linker for activation of T cells								LAT	0.6675
1150	ADAMTS14	140766	0.6675	0.063	ADAM metallopeptidase with thrombospondin type 1 motif, 14								ADAMTS14	0.6675
1151	SLC1A7	6512	0.6674	0.1053	solute carrier family 1 (glutamate transporter), member 7								SLC1A7	0.6674
1152	CT62	196993	0.6674	0.0876	cancer/testis antigen 62								CT62	0.6674
1153	TBC1D21	161514	0.6674	0.0628	TBC1 domain family, member 21								TBC1D21	0.6674
1154	KIFC3	3801	0.6672	0.0952	kinesin family member C3								KIFC3	0.6672
1155	PAX5	5079	0.667	0.1802	paired box 5								PAX5	0.667
1156	GHRH	2691	0.6669	0.077	growth hormone releasing hormone								GHRH	0.6669
1157	GPR4	2828	0.6667	0.156	G protein-coupled receptor 4								GPR4	0.6667
1158	PARD6A	50855	0.6666	0.0883	par-6 partitioning defective 6 homolog alpha (C. elegans)								PARD6A	0.6666
1159	TBC1D29	26083	0.6666	0.0809	TBC1 domain family, member 29								TBC1D29	0.6666
1160	C1ORF65	164127	0.6665	0.0114	chromosome 1 open reading frame 65								C1ORF65	0.6665
1161	CCDC63	160762	0.6665	0.0153	coiled-coil domain containing 63								CCDC63	0.6665
1162	NOVA2	4858	0.6665	0.19	neuro-oncological ventral antigen 2								NOVA2	0.6665
1163	HCG26	352961	0.6664	0.0367	HLA complex group 26 (non-protein coding)								HCG26	0.6664
1164	LGALS12	85329	0.6662	0.0237	lectin, galactoside-binding, soluble, 12								LGALS12	0.6662
1165	KIAA0664L3	100132341	0.6662	0.0464	KIAA0664-like 3								KIAA0664L3	0.6662
1166	KCNQ2	3785	0.6662	0.1605	potassium voltage-gated channel, KQT-like subfamily, member 2								KCNQ2	0.6662
1167	HOXA7	3204	0.6661	0.0032	homeobox A7								HOXA7	0.6661
1168	DUSP9	1852	0.6661	0.0698	dual specificity phosphatase 9								DUSP9	0.6661
1169	CALML3	810	0.6654	0.0488	calmodulin-like 3								CALML3	0.6654
1170	SRL	6345	0.6653	0.0839	sarcalumenin								SRL	0.6653
1171	NAT8	9027	0.6653	0.011	N-acetyltransferase 8 (GCN5-related, putative)								NAT8	0.6653
1172	MTHFR	4524	0.6653	0.1093	methylenetetrahydrofolate reductase (NAD(P)H)								MTHFR	0.6653
1173	GUCA2A	2980	0.6651	0.1803	guanylate cyclase activator 2A (guanylin)								GUCA2A	0.6651
1174	EPHX3	79852	0.6649	0.0138	epoxide hydrolase 3								EPHX3	0.6649
1175	STRA6	64220	0.6648	0.08	stimulated by retinoic acid gene 6 homolog (mouse)								STRA6	0.6648
1176	PAGE5	90737	0.6645	0.0209	P antigen family, member 5 (prostate associated)								PAGE5	0.6645
1177	GUCA2B	2981	0.6642	0.1033	guanylate cyclase activator 2B (uroguanylin)								GUCA2B	0.6642
1178	STK11	6794	0.6641	0.143	serine/threonine kinase 11								STK11	0.6641
1179	CNTD2	79935	0.6638	0.1763	cyclin N-terminal domain containing 2								CNTD2	0.6638
1180	OGFOD2	79676	0.6634	0.0942	2-oxoglutarate and iron-dependent oxygenase domain containing 2								OGFOD2	0.6634
1181	FZR1	51343	0.6631	0.129	fizzy/cell division cycle 20 related 1 (Drosophila)								FZR1	0.6631
1182	CHRNB2	1141	0.6629	0.225	cholinergic receptor, nicotinic, beta 2 (neuronal)								CHRNB2	0.6629
1183	LOC284648	284648	0.6628	0.0876	uncharacterized LOC284648								LOC284648	0.6628
1184	PRB3	5544	0.6628	0.0672	proline-rich protein BstNI subfamily 3								PRB3	0.6628
1185	LOC148145	148145	0.6627	0	uncharacterized LOC148145								LOC148145	0.6627
1186	MYEOV	26579	0.6626	0.014	myeloma overexpressed (in a subset of t(11;14) positive multiple myelomas)								MYEOV	0.6626
1187	NMUR1	10316	0.6626	0.0518	neuromedin U receptor 1								NMUR1	0.6626
1188	KRT33A	3883	0.6626	0.0021	keratin 33A								KRT33A	0.6626
1189	SIT1	27240	0.6623	0.0781	signaling threshold regulating transmembrane adaptor 1								SIT1	0.6623
1190	AHSG	197	0.6623	0.1099	alpha-2-HS-glycoprotein								AHSG	0.6623
1191	SRMS	6725	0.662	0.011	src-related kinase lacking C-terminal regulatory tyrosine and N-terminal myristylation sites								SRMS	0.662
1192	SEMA3F	6405	0.662	0.0738	sema domain, immunoglobulin domain (Ig), short basic domain, secreted, (semaphorin) 3F								SEMA3F	0.662
1193	C8ORF58	541565	0.6618	0.0301	chromosome 8 open reading frame 58								C8ORF58	0.6618
1194	TRBV7-3	28595	0.6616	0	T cell receptor beta variable 7-3								TRBV7-3	0.6616
1195	GDNF	2668	0.6614	0.0309	glial cell derived neurotrophic factor								GDNF	0.6614
1196	HCN4	10021	0.6613	0.1709	hyperpolarization activated cyclic nucleotide-gated potassium channel 4								HCN4	0.6613
1197	SDR9C7	121214	0.6612	0.006	short chain dehydrogenase/reductase family 9C, member 7								SDR9C7	0.6612
1198	PRG2	5553	0.6612	0.0078	proteoglycan 2, bone marrow (natural killer cell activator, eosinophil granule major basic protein)								PRG2	0.6612
1199	IQSEC3	440073	0.6612	0.1205	IQ motif and Sec7 domain 3								IQSEC3	0.6612
1200	ALDH3B1	221	0.6608	0.0937	aldehyde dehydrogenase 3 family, member B1								ALDH3B1	0.6608
1201	IRGC	56269	0.6607	0.0785	immunity-related GTPase family, cinema								IRGC	0.6607
1202	ABP1	26	0.6607	0.0058	amiloride binding protein 1 (amine oxidase (copper-containing))								ABP1	0.6607
1203	LOC440335	440335	0.6605	0.0256	uncharacterized LOC440335								LOC440335	0.6605
1204	PROZ	8858	0.6605	0.0523	protein Z, vitamin K-dependent plasma glycoprotein								PROZ	0.6605
1205	HEXDC	284004	0.6604	0.0745	hexosaminidase (glycosyl hydrolase family 20, catalytic domain) containing								HEXDC	0.6604
1206	TMPRSS4	56649	0.6603	0.0489	transmembrane protease, serine 4								TMPRSS4	0.6603
1207	ARHGAP27	201176	0.6603	0.0516	Rho GTPase activating protein 27								ARHGAP27	0.6603
1208	LOC100130458	100130458	0.66	0	uncharacterized LOC100130458								LOC100130458	0.66
1209	PLVAP	83483	0.6599	0.0593	plasmalemma vesicle associated protein								PLVAP	0.6599
1210	FRMD1	79981	0.6599	0.1493	FERM domain containing 1								FRMD1	0.6599
1211	RNF43	54894	0.6599	0.0215	ring finger protein 43								RNF43	0.6599
1212	IBA57	200205	0.6599	0.009	IBA57, iron-sulfur cluster assembly homolog (S. cerevisiae)								IBA57	0.6599
1213	CCDC78	124093	0.6599	0.02	coiled-coil domain containing 78								CCDC78	0.6599
1214	TSSK1B	83942	0.6596	0.0794	testis-specific serine kinase 1B								TSSK1B	0.6596
1215	HPN	3249	0.6596	0.036	hepsin								HPN	0.6596
1216	ADRB3	155	0.6596	0.2169	adrenoceptor beta 3								ADRB3	0.6596
1217	ADRA1A	148	0.6593	0.1919	adrenoceptor alpha 1A								ADRA1A	0.6593
1218	ALDOB	229	0.6588	0.0986	aldolase B, fructose-bisphosphate								ALDOB	0.6588
1219	MGC34800	162137	0.6587	0.1218	uncharacterized protein MGC34800								MGC34800	0.6587
1220	ADIG	149685	0.6586	0.0827	adipogenin								ADIG	0.6586
1221	REG1A	5967	0.6585	0.0074	regenerating islet-derived 1 alpha								REG1A	0.6585
1222	C1ORF64	149563	0.6582	0.045	chromosome 1 open reading frame 64								C1ORF64	0.6582
1223	PKD1L2	114780	0.6582	0.0985	polycystic kidney disease 1-like 2								PKD1L2	0.6582
1224	SLC4A5	57835	0.6582	0.0266	solute carrier family 4, sodium bicarbonate cotransporter, member 5								SLC4A5	0.6582
1225	C9ORF53	51198	0.6581	0.1196	chromosome 9 open reading frame 53								C9ORF53	0.6581
1226	KLK8	11202	0.6581	0.092	kallikrein-related peptidase 8								KLK8	0.6581
1227	C3P1	388503	0.6581	0.0581	complement component 3 precursor pseudogene								C3P1	0.6581
1228	MATK	4145	0.658	0.0626	megakaryocyte-associated tyrosine kinase								MATK	0.658
1229	CCDC37	348807	0.658	0.0261	coiled-coil domain containing 37								CCDC37	0.658
1230	CCDC19	25790	0.658	0.0252	coiled-coil domain containing 19								CCDC19	0.658
1231	OVOL1	5017	0.6579	0.0742	ovo-like 1(Drosophila)								OVOL1	0.6579
1232	RPL3L	6123	0.6578	0.0218	ribosomal protein L3-like								RPL3L	0.6578
1233	HOXD11	3237	0.6578	0.006	homeobox D11								HOXD11	0.6578
1234	NOS2	4843	0.6574	0.0732	nitric oxide synthase 2, inducible								NOS2	0.6574
1235	PICK1	9463	0.6573	0.1225	protein interacting with PRKCA 1								PICK1	0.6573
1236	CHAT	1103	0.6571	0.1002	choline O-acetyltransferase								CHAT	0.6571
1237	CN5H6.4	150384	0.6571	0	uncharacterized LOC150384								CN5H6.4	0.6571
1238	PPAN	56342	0.657	0.1066	peter pan homolog (Drosophila)								PPAN	0.657
1239	RHPN1	114822	0.657	0.1291	rhophilin, Rho GTPase binding protein 1								RHPN1	0.657
1240	PILRA	29992	0.6569	0.0575	paired immunoglobin-like type 2 receptor alpha								PILRA	0.6569
1241	ZNF598	90850	0.6569	0.111	zinc finger protein 598								ZNF598	0.6569
1242	PROP1	5626	0.6568	0.2106	PROP paired-like homeobox 1								PROP1	0.6568
1243	RBP5	83758	0.6565	0.0257	retinol binding protein 5, cellular								RBP5	0.6565
1244	ZNF707	286075	0.6565	0.0398	zinc finger protein 707								ZNF707	0.6565
1245	TNNC2	7125	0.6561	0.0553	troponin C type 2 (fast)								TNNC2	0.6561
1246	DEF6	50619	0.6561	0.0663	differentially expressed in FDCP 6 homolog (mouse)								DEF6	0.6561
1247	LOC100130452	100130452	0.6561	0	uncharacterized LOC100130452								LOC100130452	0.6561
1248	CRTC1	23373	0.6559	0.2505	CREB regulated transcription coactivator 1								CRTC1	0.6559
1249	MDGA1	266727	0.6559	0.1701	MAM domain containing glycosylphosphatidylinositol anchor 1								MDGA1	0.6559
1250	FERD3L	222894	0.6559	0.0836	Fer3-like (Drosophila)								FERD3L	0.6559
1251	WFDC5	149708	0.6559	0.0157	WAP four-disulfide core domain 5								WFDC5	0.6559
1252	NKX6-1	4825	0.6557	0.0487	NK6 homeobox 1								NKX6-1	0.6557
1253	CAMP	820	0.6556	0.0175	cathelicidin antimicrobial peptide								CAMP	0.6556
1254	IL27RA	9466	0.6555	0.0394	interleukin 27 receptor, alpha								IL27RA	0.6555
1255	LPAR2	9170	0.6555	0.0625	lysophosphatidic acid receptor 2								LPAR2	0.6555
1256	CASR	846	0.6554	0.2161	calcium-sensing receptor								CASR	0.6554
1257	FZD9	8326	0.6553	0.1417	frizzled family receptor 9								FZD9	0.6553
1258	GRB7	2886	0.6553	0.0366	growth factor receptor-bound protein 7								GRB7	0.6553
1259	ARSI	340075	0.6551	0.0338	arylsulfatase family, member I								ARSI	0.6551
1260	EBI3	10148	0.6548	0.0624	Epstein-Barr virus induced 3								EBI3	0.6548
1261	MAFG-AS1	92659	0.6546	0.0998	MAFG antisense RNA 1 (non-protein coding)								MAFG-AS1	0.6546
1262	SLC19A1	6573	0.6545	0.1193	solute carrier family 19 (folate transporter), member 1								SLC19A1	0.6545
1263	ANGPT4	51378	0.6545	0.1571	angiopoietin 4								ANGPT4	0.6545
1264	PPP1R14D	54866	0.6544	0.0893	protein phosphatase 1, regulatory (inhibitor) subunit 14D								PPP1R14D	0.6544
1265	CA6	765	0.6543	0.0266	carbonic anhydrase VI								CA6	0.6543
1266	BNIPL	149428	0.6543	0.0108	BCL2/adenovirus E1B 19kD interacting protein like								BNIPL	0.6543
1267	PRKAG3	53632	0.6541	0.0247	protein kinase, AMP-activated, gamma 3 non-catalytic subunit								PRKAG3	0.6541
1268	PDE6A	5145	0.654	0.0313	phosphodiesterase 6A, cGMP-specific, rod, alpha								PDE6A	0.654
1269	KRT9	3857	0.654	0.117	keratin 9								KRT9	0.654
1270	PRAP1	118471	0.654	0.0711	proline-rich acidic protein 1								PRAP1	0.654
1271	TRIM10	10107	0.6539	0.2113	tripartite motif containing 10								TRIM10	0.6539
1272	NXPH3	11248	0.6538	0.2316	neurexophilin 3								NXPH3	0.6538
1273	ANKRD53	79998	0.6538	0.0664	ankyrin repeat domain 53								ANKRD53	0.6538
1274	ALDH3A1	218	0.6537	0.0315	aldehyde dehydrogenase 3 family, member A1								ALDH3A1	0.6537
1275	C19ORF25	148223	0.6536	0.0865	chromosome 19 open reading frame 25								C19ORF25	0.6536
1276	ZNF646	9726	0.6535	0.0978	zinc finger protein 646								ZNF646	0.6535
1277	ANXA9	8416	0.6534	0.0326	annexin A9								ANXA9	0.6534
1278	NRTN	4902	0.6533	0.0178	neurturin								NRTN	0.6533
1279	SLC6A18	348932	0.6532	0.0599	solute carrier family 6, member 18								SLC6A18	0.6532
1280	ZNF843	283933	0.6532	0.1654	zinc finger protein 843								ZNF843	0.6532
1281	ALPP	250	0.6532	0.1039	alkaline phosphatase, placental								ALPP	0.6532
1282	CCDC159	126075	0.653	0.0773	coiled-coil domain containing 159								CCDC159	0.653
1283	RGR	5995	0.6529	0.203	retinal G protein coupled receptor								RGR	0.6529
1284	NCR2	9436	0.6528	0.2331	natural cytotoxicity triggering receptor 2								NCR2	0.6528
1285	FOXL2	668	0.6527	0.0037	forkhead box L2								FOXL2	0.6527
1286	WDFY4	57705	0.6526	0.0645	WDFY family member 4								WDFY4	0.6526
1287	NPR1	4881	0.6526	0.1513	natriuretic peptide receptor A/guanylate cyclase A (atrionatriuretic peptide receptor A)								NPR1	0.6526
1288	TNFRSF10C	8794	0.6522	0.0623	tumor necrosis factor receptor superfamily, member 10c, decoy without an intracellular domain								TNFRSF10C	0.6522
1289	PSORS1C1	170679	0.6521	0.0216	psoriasis susceptibility 1 candidate 1								PSORS1C1	0.6521
1290	GAPDHS	26330	0.6519	0.0786	glyceraldehyde-3-phosphate dehydrogenase, spermatogenic								GAPDHS	0.6519
1291	MAPK11	5600	0.6516	0.1973	mitogen-activated protein kinase 11								MAPK11	0.6516
1292	AMDHD2	51005	0.6516	0.0946	amidohydrolase domain containing 2								AMDHD2	0.6516
1293	MIR143HG	728264	0.6515	0.0952	MIR143 host gene (non-protein coding)								MIR143HG	0.6515
1294	RIN3	79890	0.6514	0.1013	Ras and Rab interactor 3								RIN3	0.6514
1295	GH2	2689	0.6514	0.1088	growth hormone 2								GH2	0.6514
1296	SPTBN5	51332	0.6513	0.105	spectrin, beta, non-erythrocytic 5								SPTBN5	0.6513
1297	THEG	51298	0.6512	0.1615	theg spermatid protein								THEG	0.6512
1298	ASB10	136371	0.651	0.1571	ankyrin repeat and SOCS box containing 10								ASB10	0.651
1299	MFSD6L	162387	0.6509	0.044	major facilitator superfamily domain containing 6-like								MFSD6L	0.6509
1300	NEUROG2	63973	0.6508	0.0162	neurogenin 2								NEUROG2	0.6508
1301	MTNR1B	4544	0.6508	0.0981	melatonin receptor 1B								MTNR1B	0.6508
1302	HOXA-AS3	100133311	0.6504	0.0307	HOXA cluster antisense RNA 3 (non-protein coding)								HOXA-AS3	0.6504
1303	QPCTL	54814	0.6503	0.0257	glutaminyl-peptide cyclotransferase-like								QPCTL	0.6503
1304	HHLA1	10086	0.6501	0.2267	HERV-H LTR-associating 1								HHLA1	0.6501
1305	ITPR3	3710	0.6501	0.0538	inositol 1,4,5-trisphosphate receptor, type 3								ITPR3	0.6501
1306	KRT79	338785	0.6496	0.0203	keratin 79								KRT79	0.6496
1307	MGC23270	196872	0.6496	0.0394	uncharacterized LOC196872								MGC23270	0.6496
1308	LYPD3	27076	0.6495	0.0572	LY6/PLAUR domain containing 3								LYPD3	0.6495
1309	ABCB8	11194	0.6495	0.1041	ATP-binding cassette, sub-family B (MDR/TAP), member 8								ABCB8	0.6495
1310	IL25	64806	0.6494	0.1299	interleukin 25								IL25	0.6494
1311	MYLPF	29895	0.6492	0.0699	myosin light chain, phosphorylatable, fast skeletal muscle								MYLPF	0.6492
1312	MSLN	10232	0.6492	0.014	mesothelin								MSLN	0.6492
1313	MIOX	55586	0.6491	0.0313	myo-inositol oxygenase								MIOX	0.6491
1314	WISP2	8839	0.6486	0.082	WNT1 inducible signaling pathway protein 2								WISP2	0.6486
1315	AVP	551	0.6486	0.1646	arginine vasopressin								AVP	0.6486
1316	FAM205A	259308	0.6482	0.0544	family with sequence similarity 205, member A								FAM205A	0.6482
1317	LAD1	3898	0.6481	0.0731	ladinin 1								LAD1	0.6481
1318	C22ORF31	25770	0.6481	0.0969	chromosome 22 open reading frame 31								C22ORF31	0.6481
1319	WNT10A	80326	0.6481	0.0216	wingless-type MMTV integration site family, member 10A								WNT10A	0.6481
1320	GIGYF1	64599	0.6481	0.1078	GRB10 interacting GYF protein 1								GIGYF1	0.6481
1321	CSH1	1442	0.648	0.031	chorionic somatomammotropin hormone 1 (placental lactogen)								CSH1	0.648
1322	CAV3	859	0.6478	0.167	caveolin 3								CAV3	0.6478
1323	RRAD	6236	0.6473	0.0507	Ras-related associated with diabetes								RRAD	0.6473
1324	MYCBPAP	84073	0.6471	0.0267	MYCBP associated protein								MYCBPAP	0.6471
1325	RILP	83547	0.6471	0.1269	Rab interacting lysosomal protein								RILP	0.6471
1326	TP53I11	9537	0.647	0.071	tumor protein p53 inducible protein 11								TP53I11	0.647
1327	MTMR9LP	339483	0.6469	0.0574	myotubularin related protein 9-like, pseudogene								MTMR9LP	0.6469
1328	VSIG2	23584	0.6469	0.0247	V-set and immunoglobulin domain containing 2								VSIG2	0.6469
1329	CTF1	1489	0.6467	0.0952	cardiotrophin 1								CTF1	0.6467
1330	TPSAB1	7177	0.6467	0.0715	tryptase alpha/beta 1								TPSAB1	0.6467
1331	SP5	389058	0.6466	0.0115	Sp5 transcription factor								SP5	0.6466
1332	OTOF	9381	0.6465	0.1075	otoferlin								OTOF	0.6465
1333	LRRC3	81543	0.6465	0.1004	leucine rich repeat containing 3								LRRC3	0.6465
1334	JRK	8629	0.6462	0.0775	jerky homolog (mouse)								JRK	0.6462
1335	HOXA3	3200	0.6462	0.0187	homeobox A3								HOXA3	0.6462
1336	CRIP3	401262	0.646	0.0071	cysteine-rich protein 3								CRIP3	0.646
1337	PRODH2	58510	0.646	0.2009	proline dehydrogenase (oxidase) 2								PRODH2	0.646
1338	PTPRH	5794	0.6458	0.0432	protein tyrosine phosphatase, receptor type, H								PTPRH	0.6458
1339	LRRC48	83450	0.6456	0.0354	leucine rich repeat containing 48								LRRC48	0.6456
1340	SHBG	6462	0.6456	0.166	sex hormone-binding globulin								SHBG	0.6456
1341	HYAL4	23553	0.6455	0.0461	hyaluronoglucosaminidase 4								HYAL4	0.6455
1342	TM4SF20	79853	0.6453	0.0092	transmembrane 4 L six family member 20								TM4SF20	0.6453
1343	PHOSPHO1	162466	0.6451	0.0114	phosphatase, orphan 1								PHOSPHO1	0.6451
1344	PGLYRP2	114770	0.6447	0.0093	peptidoglycan recognition protein 2								PGLYRP2	0.6447
1345	KCTD17	79734	0.6446	0.1676	potassium channel tetramerisation domain containing 17								KCTD17	0.6446
1346	SP6	80320	0.6446	0.0471	Sp6 transcription factor								SP6	0.6446
1347	PRSS21	10942	0.6445	0.0023	protease, serine, 21 (testisin)								PRSS21	0.6445
1348	SIGLEC11	114132	0.6445	0.0322	sialic acid binding Ig-like lectin 11								SIGLEC11	0.6445
1349	IRX4	50805	0.6444	0.0223	iroquois homeobox 4								IRX4	0.6444
1350	LOC100128239	100128239	0.6444	0.037	uncharacterized LOC100128239								LOC100128239	0.6444
1351	C9ORF62	157927	0.6443	0	chromosome 9 open reading frame 62								C9ORF62	0.6443
1352	HAGHL	84264	0.6442	0.0982	hydroxyacylglutathione hydrolase-like								HAGHL	0.6442
1353	MYL10	93408	0.6438	0.0965	myosin, light chain 10, regulatory								MYL10	0.6438
1354	LY6K	54742	0.6436	0.0166	lymphocyte antigen 6 complex, locus K								LY6K	0.6436
1355	POU5F2	134187	0.6436	0.0356	POU domain class 5, transcription factor 2								POU5F2	0.6436
1356	KRT74	121391	0.6435	0.1014	keratin 74								KRT74	0.6435
1357	MEF2D	4209	0.6434	0.138	myocyte enhancer factor 2D								MEF2D	0.6434
1358	MAFK	7975	0.6433	0.0531	v-maf musculoaponeurotic fibrosarcoma oncogene homolog K (avian)								MAFK	0.6433
1359	FAM176B	55194	0.6432	0.1117	family with sequence similarity 176, member B								FAM176B	0.6432
1360	KRTCAP3	200634	0.6431	0.0152	keratinocyte associated protein 3								KRTCAP3	0.6431
1361	NOX1	27035	0.643	0.1754	NADPH oxidase 1								NOX1	0.643
1362	KCNK15	60598	0.6429	0.0093	potassium channel, subfamily K, member 15								KCNK15	0.6429
1363	MADCAM1	8174	0.6425	0.193	mucosal vascular addressin cell adhesion molecule 1								MADCAM1	0.6425
1364	SLC16A5	9121	0.6424	0.038	solute carrier family 16, member 5 (monocarboxylic acid transporter 6)								SLC16A5	0.6424
1365	PKD2L1	9033	0.6422	0.0674	polycystic kidney disease 2-like 1								PKD2L1	0.6422
1366	EMID2	136227	0.6421	0.1383	EMI domain containing 2								EMID2	0.6421
1367	VNN3	55350	0.642	0.0638	vanin 3								VNN3	0.642
1368	CALHM3	119395	0.6419	0.0146	calcium homeostasis modulator 3								CALHM3	0.6419
1369	SEC14L3	266629	0.6418	0.1225	SEC14-like 3 (S. cerevisiae)								SEC14L3	0.6418
1370	TRMT2A	27037	0.6416	0.1291	tRNA methyltransferase 2 homolog A (S. cerevisiae)								TRMT2A	0.6416
1371	INTS1	26173	0.6414	0.1352	integrator complex subunit 1								INTS1	0.6414
1372	B3GNT3	10331	0.6414	0.1287	UDP-GlcNAc:betaGal beta-1,3-N-acetylglucosaminyltransferase 3								B3GNT3	0.6414
1373	MDFI	4188	0.6413	0.0802	MyoD family inhibitor								MDFI	0.6413
1374	NR6A1	2649	0.6412	0.1954	nuclear receptor subfamily 6, group A, member 1								NR6A1	0.6412
1375	CEACAM7	1087	0.6411	0.087	carcinoembryonic antigen-related cell adhesion molecule 7								CEACAM7	0.6411
1376	ODF3	113746	0.641	0.1714	outer dense fiber of sperm tails 3								ODF3	0.641
1377	TRAF2	7186	0.6408	0.1154	TNF receptor-associated factor 2								TRAF2	0.6408
1378	DSCR4	10281	0.6407	0.1376	Down syndrome critical region gene 4								DSCR4	0.6407
1379	VIPR2	7434	0.6406	0.2065	vasoactive intestinal peptide receptor 2								VIPR2	0.6406
1380	C19ORF69	100170765	0.6405	0.0106	chromosome 19 open reading frame 69								C19ORF69	0.6405
1381	PSCA	8000	0.6404	0.011	prostate stem cell antigen								PSCA	0.6404
1382	C9ORF96	169436	0.6404	0.0971	chromosome 9 open reading frame 96								C9ORF96	0.6404
1383	ANKRD33	341405	0.6403	0.0297	ankyrin repeat domain 33								ANKRD33	0.6403
1384	COL2A1	1280	0.6402	0.043	collagen, type II, alpha 1								COL2A1	0.6402
1385	CXORF64	100130613	0.6402	0.0859	chromosome X open reading frame 64								CXORF64	0.6402
1386	C21ORF58	54058	0.6401	0.089	chromosome 21 open reading frame 58								C21ORF58	0.6401
1387	PLEKHA4	57664	0.6401	0.0868	pleckstrin homology domain containing, family A (phosphoinositide binding specific) member 4								PLEKHA4	0.6401
1388	PRDM8	56978	0.6399	0.1201	PR domain containing 8								PRDM8	0.6399
1389	C17ORF64	124773	0.6398	0.0068	chromosome 17 open reading frame 64								C17ORF64	0.6398
1390	NKG7	4818	0.6397	0.0536	natural killer cell group 7 sequence								NKG7	0.6397
1391	NCAPH2	29781	0.6396	0.1467	non-SMC condensin II complex, subunit H2								NCAPH2	0.6396
1392	CGN	57530	0.6395	0.0308	cingulin								CGN	0.6395
1393	ACSBG2	81616	0.6395	0.0742	acyl-CoA synthetase bubblegum family member 2								ACSBG2	0.6395
1394	LOC284551	284551	0.6394	0	uncharacterized LOC284551								LOC284551	0.6394
1395	HOXB3	3213	0.6392	0.0184	homeobox B3								HOXB3	0.6392
1396	TEX11	56159	0.6391	0.0407	testis expressed 11								TEX11	0.6391
1397	ST6GALNAC4	27090	0.639	0.0672	ST6 (alpha-N-acetyl-neuraminyl-2,3-beta-galactosyl-1,3)-N-acetylgalactosaminide alpha-2,6-sialyltransferase 4								ST6GALNAC4	0.639
1398	CDX1	1044	0.639	0.1809	caudal type homeobox 1								CDX1	0.639
1399	DCST1	149095	0.6389	0.0702	DC-STAMP domain containing 1								DCST1	0.6389
1400	LTBP4	8425	0.6388	0.125	latent transforming growth factor beta binding protein 4								LTBP4	0.6388
1401	AGPAT2	10555	0.6388	0.1417	1-acylglycerol-3-phosphate O-acyltransferase 2 (lysophosphatidic acid acyltransferase, beta)								AGPAT2	0.6388
1402	GNLY	10578	0.6387	0.0361	granulysin								GNLY	0.6387
1403	KLHL31	401265	0.6385	0.0755	kelch-like 31 (Drosophila)								KLHL31	0.6385
1404	PLA2G2E	30814	0.6382	0.1044	phospholipase A2, group IIE								PLA2G2E	0.6382
1405	ELN	2006	0.6382	0.1238	elastin								ELN	0.6382
1406	B4GALT1	2683	0.6379	0.0508	UDP-Gal:betaGlcNAc beta 1,4- galactosyltransferase, polypeptide 1								B4GALT1	0.6379
1407	HFE	3077	0.6377	0.0717	hemochromatosis								HFE	0.6377
1408	CC2D1A	54862	0.6375	0.1426	coiled-coil and C2 domain containing 1A								CC2D1A	0.6375
1409	SIX2	10736	0.6373	0.0192	SIX homeobox 2								SIX2	0.6373
1410	TELO2	9894	0.6372	0.1389	TEL2, telomere maintenance 2, homolog (S. cerevisiae)								TELO2	0.6372
1411	ITIH1	3697	0.6372	0.0558	inter-alpha-trypsin inhibitor heavy chain 1								ITIH1	0.6372
1412	RIPPLY1	92129	0.6372	0.0164	ripply1 homolog (zebrafish)								RIPPLY1	0.6372
1413	GAL3ST2	64090	0.6371	0.0469	galactose-3-O-sulfotransferase 2								GAL3ST2	0.6371
1414	GPR27	2850	0.6369	0.1172	G protein-coupled receptor 27								GPR27	0.6369
1415	CYP4F22	126410	0.6366	0.0157	cytochrome P450, family 4, subfamily F, polypeptide 22								CYP4F22	0.6366
1416	NHLRC4	283948	0.6361	0.1222	NHL repeat containing 4								NHLRC4	0.6361
1417	HMGB4	127540	0.6361	0.0342	high mobility group box 4								HMGB4	0.6361
1418	SLC22A1	6580	0.636	0.0194	solute carrier family 22 (organic cation transporter), member 1								SLC22A1	0.636
1419	C16ORF3	750	0.6358	0.0936	chromosome 16 open reading frame 3								C16ORF3	0.6358
1420	MDS2	259283	0.6358	0.0359	myelodysplastic syndrome 2 translocation associated								MDS2	0.6358
1421	NOS3	4846	0.6357	0.0375	nitric oxide synthase 3 (endothelial cell)								NOS3	0.6357
1422	HOXD3	3232	0.6356	0.0637	homeobox D3								HOXD3	0.6356
1423	CCDC61	729440	0.6355	0.0807	coiled-coil domain containing 61								CCDC61	0.6355
1424	POF1B	79983	0.6353	0.0164	premature ovarian failure, 1B								POF1B	0.6353
1425	TRIM61	391712	0.6349	0.0724	tripartite motif containing 61								TRIM61	0.6349
1426	GPHA2	170589	0.6348	0.066	glycoprotein hormone alpha 2								GPHA2	0.6348
1427	HOXB13	10481	0.6346	0.0861	homeobox B13								HOXB13	0.6346
1428	PTGES	9536	0.6345	0.0453	prostaglandin E synthase								PTGES	0.6345
1429	MYH13	8735	0.6343	0.0794	myosin, heavy chain 13, skeletal muscle								MYH13	0.6343
1430	SPSB4	92369	0.6342	0.0936	splA/ryanodine receptor domain and SOCS box containing 4								SPSB4	0.6342
1431	PLA2G12B	84647	0.6341	0.0513	phospholipase A2, group XIIB								PLA2G12B	0.6341
1432	GLI4	2738	0.6341	0.0874	GLI family zinc finger 4								GLI4	0.6341
1433	SPEM1	374768	0.634	0.1172	spermatid maturation 1								SPEM1	0.634
1434	IKBKE	9641	0.6338	0.0724	inhibitor of kappa light polypeptide gene enhancer in B-cells, kinase epsilon								IKBKE	0.6338
1435	THPO	7066	0.6337	0.1682	thrombopoietin								THPO	0.6337
1436	C16ORF74	404550	0.6336	0.0262	chromosome 16 open reading frame 74								C16ORF74	0.6336
1437	HRH2	3274	0.6335	0.1649	histamine receptor H2								HRH2	0.6335
1438	NEK8	284086	0.6334	0.0454	NIMA (never in mitosis gene a)- related kinase 8								NEK8	0.6334
1439	CD5	921	0.6333	0.1453	CD5 molecule								CD5	0.6333
1440	GGN	199720	0.6332	0.1472	gametogenetin								GGN	0.6332
1441	VWA5B2	90113	0.6331	0.1809	von Willebrand factor A domain containing 5B2								VWA5B2	0.6331
1442	FLJ42875	440556	0.6331	0.1592	uncharacterized LOC440556								FLJ42875	0.6331
1443	CYTH4	27128	0.6331	0.1349	cytohesin 4								CYTH4	0.6331
1444	HBM	3042	0.633	0.0279	hemoglobin, mu								HBM	0.633
1445	FOXA2	3170	0.6329	0.0781	forkhead box A2								FOXA2	0.6329
1446	ADRA2C	152	0.6329	0.1252	adrenoceptor alpha 2C								ADRA2C	0.6329
1447	ZNF628	89887	0.6329	0.0783	zinc finger protein 628								ZNF628	0.6329
1448	KAAG1	353219	0.6327	0.0392	kidney associated antigen 1								KAAG1	0.6327
1449	TSPAN32	10077	0.6327	0.1046	tetraspanin 32								TSPAN32	0.6327
1450	ACADS	35	0.6324	0.1248	acyl-CoA dehydrogenase, C-2 to C-3 short chain								ACADS	0.6324
1451	C11ORF20	25858	0.6324	0.1907	chromosome 11 open reading frame 20								C11ORF20	0.6324
1452	HES4	57801	0.6323	0.0544	hairy and enhancer of split 4 (Drosophila)								HES4	0.6323
1453	PATE1	160065	0.6321	0.0548	prostate and testis expressed 1								PATE1	0.6321
1454	WT1	7490	0.6321	0.0115	Wilms tumor 1								WT1	0.6321
1455	FOXE3	2301	0.6321	0.0979	forkhead box E3								FOXE3	0.6321
1456	AMHR2	269	0.6319	0.223	anti-Mullerian hormone receptor, type II								AMHR2	0.6319
1457	LRIT1	26103	0.6318	0.0822	leucine-rich repeat, immunoglobulin-like and transmembrane domains 1								LRIT1	0.6318
1458	DNAH17	8632	0.6314	0.1057	dynein, axonemal, heavy chain 17								DNAH17	0.6314
1459	SCRT1	83482	0.6314	0.1114	scratch homolog 1, zinc finger protein (Drosophila)								SCRT1	0.6314
1460	LOC730098	730098	0.6314	0.0518	uncharacterized LOC730098								LOC730098	0.6314
1461	KRT14	3861	0.6313	0.0174	keratin 14								KRT14	0.6313
1462	CCER1	196477	0.6313	0.0267	coiled-coil glutamate-rich protein 1								CCER1	0.6313
1463	TEPP	374739	0.6311	0.0434	testis, prostate and placenta expressed								TEPP	0.6311
1464	JOSD2	126119	0.6311	0.1041	Josephin domain containing 2								JOSD2	0.6311
1465	F7	2155	0.631	0.0915	coagulation factor VII (serum prothrombin conversion accelerator)								F7	0.631
1466	SCML4	256380	0.6309	0.0311	sex comb on midleg-like 4 (Drosophila)								SCML4	0.6309
1467	KRT78	196374	0.6309	0.0298	keratin 78								KRT78	0.6309
1468	TMUB1	83590	0.6306	0.1454	transmembrane and ubiquitin-like domain containing 1								TMUB1	0.6306
1469	MMP19	4327	0.6304	0.1832	matrix metallopeptidase 19								MMP19	0.6304
1470	PRM2	5620	0.6303	0.0882	protamine 2								PRM2	0.6303
1471	GGT6	124975	0.6302	0.016	gamma-glutamyltransferase 6								GGT6	0.6302
1472	DMRTB1	63948	0.6301	0.0935	DMRT-like family B with proline-rich C-terminal, 1								DMRTB1	0.6301
1473	CD300C	10871	0.63	0.088	CD300c molecule								CD300C	0.63
1474	NFKB2	4791	0.6299	0.1185	nuclear factor of kappa light polypeptide gene enhancer in B-cells 2 (p49/p100)								NFKB2	0.6299
1475	CST6	1474	0.6299	0.0115	cystatin E/M								CST6	0.6299
1476	FLJ11235	54508	0.6299	0.0304	uncharacterized FLJ11235								FLJ11235	0.6299
1477	EPHB4	2050	0.6298	0.0983	EPH receptor B4								EPHB4	0.6298
1478	CEACAM3	1084	0.6298	0.1992	carcinoembryonic antigen-related cell adhesion molecule 3								CEACAM3	0.6298
1479	LYZL6	57151	0.6297	0.0606	lysozyme-like 6								LYZL6	0.6297
1480	GH1	2688	0.6295	0.1523	growth hormone 1								GH1	0.6295
1481	CYP2A6	1548	0.6295	0.1741	cytochrome P450, family 2, subfamily A, polypeptide 6								CYP2A6	0.6295
1482	LYL1	4066	0.6294	0.1116	lymphoblastic leukemia derived sequence 1								LYL1	0.6294
1483	MMP15	4324	0.6293	0.1201	matrix metallopeptidase 15 (membrane-inserted)								MMP15	0.6293
1484	CAPN8	388743	0.6291	0.0168	calpain 8								CAPN8	0.6291
1485	PADI3	51702	0.6291	0.0923	peptidyl arginine deiminase, type III								PADI3	0.6291
1486	FGG	2266	0.629	0.0049	fibrinogen gamma chain								FGG	0.629
1487	PRR19	284338	0.6288	0.0899	proline rich 19								PRR19	0.6288
1488	EPN3	55040	0.6288	0.0489	epsin 3								EPN3	0.6288
1489	SUSD3	203328	0.6288	0.0255	sushi domain containing 3								SUSD3	0.6288
1490	PSORS1C3	100130889	0.6286	0.0032	psoriasis susceptibility 1 candidate 3 (non-protein coding)								PSORS1C3	0.6286
1491	APCS	325	0.6286	0.1124	amyloid P component, serum								APCS	0.6286
1492	FRMD7	90167	0.6285	0.0083	FERM domain containing 7								FRMD7	0.6285
1493	ZMYND10	51364	0.6285	0.1633	zinc finger, MYND-type containing 10								ZMYND10	0.6285
1494	FUT6	2528	0.6285	0.1762	fucosyltransferase 6 (alpha (1,3) fucosyltransferase)								FUT6	0.6285
1495	FLJ45513	729220	0.6284	0	uncharacterized LOC729220								FLJ45513	0.6284
1496	SPIB	6689	0.6281	0.0654	Spi-B transcription factor (Spi-1/PU.1 related)								SPIB	0.6281
1497	GJD3	125111	0.6281	0.1702	gap junction protein, delta 3, 31.9kDa								GJD3	0.6281
1498	DZANK1-AS1	440757	0.6281	0.1808	DZANK1 antisense RNA 1 (non-protein coding)								DZANK1-AS1	0.6281
1499	LOC283731	283731	0.628	0	uncharacterized LOC283731								LOC283731	0.628
1500	ZG16B	124220	0.628	0.0133	zymogen granule protein 16 homolog B (rat)								ZG16B	0.628
1501	PML	5371	0.6275	0.148	promyelocytic leukemia								PML	0.6275
1502	CYP1A2	1544	0.6275	0.1441	cytochrome P450, family 1, subfamily A, polypeptide 2								CYP1A2	0.6275
1503	CYP11B1	1584	0.6273	0.1681	cytochrome P450, family 11, subfamily B, polypeptide 1								CYP11B1	0.6273
1504	NFKBID	84807	0.6273	0.0366	nuclear factor of kappa light polypeptide gene enhancer in B-cells inhibitor, delta								NFKBID	0.6273
1505	DLK2	65989	0.6272	0.0626	delta-like 2 homolog (Drosophila)								DLK2	0.6272
1506	PYY	5697	0.627	0.1653	peptide YY								PYY	0.627
1507	VCX	26609	0.6265	0.0086	variable charge, X-linked								VCX	0.6265
1508	BSPRY	54836	0.6265	0.0292	B-box and SPRY domain containing								BSPRY	0.6265
1509	PKMYT1	9088	0.6264	0.1469	protein kinase, membrane associated tyrosine/threonine 1								PKMYT1	0.6264
1510	NRAP	4892	0.6264	0.153	nebulin-related anchoring protein								NRAP	0.6264
1511	C15ORF55	256646	0.6264	0.1715	chromosome 15 open reading frame 55								C15ORF55	0.6264
1512	KHDC1L	100129128	0.6262	0.0302	KH homology domain containing 1-like								KHDC1L	0.6262
1513	IDUA	3425	0.6262	0.1294	iduronidase, alpha-L-								IDUA	0.6262
1514	KRT24	192666	0.6262	0.0077	keratin 24								KRT24	0.6262
1515	THRSP	7069	0.626	0.0782	thyroid hormone responsive								THRSP	0.626
1516	ADAMTS7	11173	0.6259	0.1099	ADAM metallopeptidase with thrombospondin type 1 motif, 7								ADAMTS7	0.6259
1517	LAMA5	3911	0.6259	0.0546	laminin, alpha 5								LAMA5	0.6259
1518	RLTPR	146206	0.6258	0.1224	RGD motif, leucine rich repeats, tropomodulin domain and proline-rich containing								RLTPR	0.6258
1519	CACNA1A	773	0.6256	0.1417	calcium channel, voltage-dependent, P/Q type, alpha 1A subunit								CACNA1A	0.6256
1520	TCEB3B	51224	0.6256	0.1238	transcription elongation factor B polypeptide 3B (elongin A2)								TCEB3B	0.6256
1521	ECE1	1889	0.6255	0.1599	endothelin converting enzyme 1								ECE1	0.6255
1522	ADAMTS15	170689	0.6254	0.0201	ADAM metallopeptidase with thrombospondin type 1 motif, 15								ADAMTS15	0.6254
1523	CD1E	913	0.6254	0.0358	CD1e molecule								CD1E	0.6254
1524	DOK4	55715	0.6254	0.0914	docking protein 4								DOK4	0.6254
1525	ACE	1636	0.6253	0.0869	angiotensin I converting enzyme (peptidyl-dipeptidase A) 1								ACE	0.6253
1526	TSPY26P	128854	0.6251	0.0365	testis specific protein, Y-linked 26, pseudogene								TSPY26P	0.6251
1527	FOXD2	2306	0.6251	0.0238	forkhead box D2								FOXD2	0.6251
1528	UFSP1	402682	0.625	0.0901	UFM1-specific peptidase 1 (non-functional)								UFSP1	0.625
1529	MMP17	4326	0.6249	0.1809	matrix metallopeptidase 17 (membrane-inserted)								MMP17	0.6249
1530	CROCCP3	114819	0.6248	0.0791	ciliary rootlet coiled-coil, rootletin pseudogene 3								CROCCP3	0.6248
1531	DUSP21	63904	0.6246	0.1031	dual specificity phosphatase 21								DUSP21	0.6246
1532	ARHGEF19	128272	0.6246	0.0433	Rho guanine nucleotide exchange factor (GEF) 19								ARHGEF19	0.6246
1533	H1FOO	132243	0.6245	0.0974	H1 histone family, member O, oocyte-specific								H1FOO	0.6245
1534	ACAP1	9744	0.6244	0.114	ArfGAP with coiled-coil, ankyrin repeat and PH domains 1								ACAP1	0.6244
1535	TRIML2	205860	0.6244	0.0211	tripartite motif family-like 2								TRIML2	0.6244
1536	WWC2-AS2	152641	0.6244	0.0837	WWC2 antisense RNA 2 (non-protein coding)								WWC2-AS2	0.6244
1537	BDKRB2	624	0.6243	0.0368	bradykinin receptor B2								BDKRB2	0.6243
1538	GPSM3	63940	0.6242	0.1526	G-protein signaling modulator 3								GPSM3	0.6242
1539	PIWIL1	9271	0.6238	0.0201	piwi-like 1 (Drosophila)								PIWIL1	0.6238
1540	C7ORF34	135927	0.6235	0.0703	chromosome 7 open reading frame 34								C7ORF34	0.6235
1541	TBL1Y	90665	0.6234	0.0103	transducin (beta)-like 1, Y-linked								TBL1Y	0.6234
1542	PRSS30P	124221	0.623	0.0436	protease, serine, 30 homolog (mouse), pseudogene								PRSS30P	0.623
1543	RIN1	9610	0.623	0.1521	Ras and Rab interactor 1								RIN1	0.623
1544	IRF5	3663	0.623	0.1068	interferon regulatory factor 5								IRF5	0.623
1545	DOK3	79930	0.6228	0.0808	docking protein 3								DOK3	0.6228
1546	BPIFB2	80341	0.6227	0.095	BPI fold containing family B, member 2								BPIFB2	0.6227
1547	HOXA11	3207	0.6227	0.0461	homeobox A11								HOXA11	0.6227
1548	IQCF1	132141	0.6226	0.0217	IQ motif containing F1								IQCF1	0.6226
1549	PAPPA2	60676	0.6226	0.1127	pappalysin 2								PAPPA2	0.6226
1550	GCK	2645	0.6224	0.1575	glucokinase (hexokinase 4)								GCK	0.6224
1551	LCN10	414332	0.622	0.1107	lipocalin 10								LCN10	0.622
1552	APOC3	345	0.622	0.0571	apolipoprotein C-III								APOC3	0.622
1553	HCN2	610	0.6218	0.1253	hyperpolarization activated cyclic nucleotide-gated potassium channel 2								HCN2	0.6218
1554	ATOH1	474	0.6216	0.1166	atonal homolog 1 (Drosophila)								ATOH1	0.6216
1555	SEMA6B	10501	0.6215	0.2016	sema domain, transmembrane domain (TM), and cytoplasmic domain, (semaphorin) 6B								SEMA6B	0.6215
1556	MYLK2	85366	0.6212	0.1275	myosin light chain kinase 2								MYLK2	0.6212
1557	IL17RC	84818	0.6211	0.1347	interleukin 17 receptor C								IL17RC	0.6211
1558	SMAD6	4091	0.6211	0.0547	SMAD family member 6								SMAD6	0.6211
1559	TMPRSS13	84000	0.6211	0.0255	transmembrane protease, serine 13								TMPRSS13	0.6211
1560	UPK1A	11045	0.621	0.0569	uroplakin 1A								UPK1A	0.621
1561	C6ORF15	29113	0.6207	0.2102	chromosome 6 open reading frame 15								C6ORF15	0.6207
1562	WWTR1-AS1	100128025	0.6206	0	WWTR1 antisense RNA 1 (non-protein coding)								WWTR1-AS1	0.6206
1563	STAP2	55620	0.6205	0.0351	signal transducing adaptor family member 2								STAP2	0.6205
1564	SLC35C1	55343	0.6204	0.1198	solute carrier family 35, member C1								SLC35C1	0.6204
1565	SYNGR4	23546	0.6203	0.158	synaptogyrin 4								SYNGR4	0.6203
1566	UCN2	90226	0.6201	0.0756	urocortin 2								UCN2	0.6201
1567	DMP1	1758	0.6201	0.0444	dentin matrix acidic phosphoprotein 1								DMP1	0.6201
1568	MYH7B	57644	0.62	0.0435	myosin, heavy chain 7B, cardiac muscle, beta								MYH7B	0.62
1569	2022-09-12	124404	0.62	0.1352	septin 12								2022-09-12	0.62
1570	ZSCAN10	84891	0.6194	0.1045	zinc finger and SCAN domain containing 10								ZSCAN10	0.6194
1571	SPPL2B	56928	0.6193	0.1488	signal peptide peptidase like 2B								SPPL2B	0.6193
1572	ADH4	127	0.6192	0.0042	alcohol dehydrogenase 4 (class II), pi polypeptide								ADH4	0.6192
1573	GDPD3	79153	0.6192	0.0305	glycerophosphodiester phosphodiesterase domain containing 3								GDPD3	0.6192
1574	RGL4	266747	0.6191	0.0295	ral guanine nucleotide dissociation stimulator-like 4								RGL4	0.6191
1575	C4BPB	725	0.6191	0.0096	complement component 4 binding protein, beta								C4BPB	0.6191
1576	TONSL	4796	0.6191	0.1629	tonsoku-like, DNA repair protein								TONSL	0.6191
1577	ACTL9	284382	0.6187	0.0214	actin-like 9								ACTL9	0.6187
1578	RDH5	5959	0.6187	0.0555	retinol dehydrogenase 5 (11-cis/9-cis)								RDH5	0.6187
1579	TREML2	79865	0.6187	0.0902	triggering receptor expressed on myeloid cells-like 2								TREML2	0.6187
1580	FES	2242	0.6184	0.0773	feline sarcoma oncogene								FES	0.6184
1581	HIPK4	147746	0.6183	0.1092	homeodomain interacting protein kinase 4								HIPK4	0.6183
1582	FOXD2-AS1	84793	0.6182	0.0934	FOXD2 antisense RNA 1 (non-protein coding)								FOXD2-AS1	0.6182
1583	SOX15	6665	0.6181	0.1281	SRY (sex determining region Y)-box 15								SOX15	0.6181
1584	LINC00521	256369	0.6179	0.1561	long intergenic non-protein coding RNA 521								LINC00521	0.6179
1585	TMEM132E	124842	0.6178	0.1622	transmembrane protein 132E								TMEM132E	0.6178
1586	DNAH3	55567	0.6176	0.2105	dynein, axonemal, heavy chain 3								DNAH3	0.6176
1587	PDE4A	5141	0.6176	0.1319	phosphodiesterase 4A, cAMP-specific								PDE4A	0.6176
1588	B3GNT4	79369	0.6175	0.205	UDP-GlcNAc:betaGal beta-1,3-N-acetylglucosaminyltransferase 4								B3GNT4	0.6175
1589	C19ORF73	55150	0.6175	0.0919	chromosome 19 open reading frame 73								C19ORF73	0.6175
1590	CELA3A	10136	0.6175	0.103	chymotrypsin-like elastase family, member 3A								CELA3A	0.6175
1591	CACNA1I	8911	0.6174	0.2093	calcium channel, voltage-dependent, T type, alpha 1I subunit								CACNA1I	0.6174
1592	EXOC3L1	283849	0.6174	0.0832	exocyst complex component 3-like 1								EXOC3L1	0.6174
1593	ZNF541	84215	0.6174	0.0208	zinc finger protein 541								ZNF541	0.6174
1594	SUN3	256979	0.6173	0.0091	Sad1 and UNC84 domain containing 3								SUN3	0.6173
1595	KLHDC7B	113730	0.6173	0.0523	kelch domain containing 7B								KLHDC7B	0.6173
1596	TRPC2	7221	0.6172	0.0611	transient receptor potential cation channel, subfamily C, member 2, pseudogene								TRPC2	0.6172
1597	KLK13	26085	0.6171	0.2015	kallikrein-related peptidase 13								KLK13	0.6171
1598	PRTN3	5657	0.617	0.0518	proteinase 3								PRTN3	0.617
1599	STAB2	55576	0.617	0.1898	stabilin 2								STAB2	0.617
1600	KCTD14	65987	0.6169	0.0083	potassium channel tetramerisation domain containing 14								KCTD14	0.6169
1601	TACR1	6869	0.6168	0.2198	tachykinin receptor 1								TACR1	0.6168
1602	OSBP2	23762	0.6168	0.17	oxysterol binding protein 2								OSBP2	0.6168
1603	PRSS33	260429	0.6166	0.1099	protease, serine, 33								PRSS33	0.6166
1604	ZNF500	26048	0.6166	0.0842	zinc finger protein 500								ZNF500	0.6166
1605	C17ORF53	78995	0.6165	0.1417	chromosome 17 open reading frame 53								C17ORF53	0.6165
1606	ACE2	59272	0.6165	0.0232	angiotensin I converting enzyme (peptidyl-dipeptidase A) 2								ACE2	0.6165
1607	LOC151658	151658	0.6165	0.0159	uncharacterized LOC151658								LOC151658	0.6165
1608	ADAMTS16	170690	0.6164	0.0166	ADAM metallopeptidase with thrombospondin type 1 motif, 16								ADAMTS16	0.6164
1609	KRTAP5-9	3846	0.6162	0.1803	keratin associated protein 5-9								KRTAP5-9	0.6162
1610	TLX3	30012	0.6162	0.0472	T-cell leukemia homeobox 3								TLX3	0.6162
1611	FLT3LG	2323	0.6162	0.0795	fms-related tyrosine kinase 3 ligand								FLT3LG	0.6162
1612	INMT	11185	0.6161	0.0351	indolethylamine N-methyltransferase								INMT	0.6161
1613	ANKMY1	51281	0.6161	0.0183	ankyrin repeat and MYND domain containing 1								ANKMY1	0.6161
1614	CCDC102A	92922	0.616	0.0438	coiled-coil domain containing 102A								CCDC102A	0.616
1615	ESRRB	2103	0.616	0.0849	estrogen-related receptor beta								ESRRB	0.616
1616	IGF2BP1	10642	0.616	0.0536	insulin-like growth factor 2 mRNA binding protein 1								IGF2BP1	0.616
1617	SLC28A3	64078	0.6158	0.0546	solute carrier family 28 (sodium-coupled nucleoside transporter), member 3								SLC28A3	0.6158
1618	CCDC13	152206	0.6158	0.1267	coiled-coil domain containing 13								CCDC13	0.6158
1619	RCOR2	283248	0.6156	0.0982	REST corepressor 2								RCOR2	0.6156
1620	C10ORF67	256815	0.6156	0.0563	chromosome 10 open reading frame 67								C10ORF67	0.6156
1621	AP5Z1	9907	0.6156	0.1092	adaptor-related protein complex 5, zeta 1 subunit								AP5Z1	0.6156
1622	IKZF4	64375	0.6155	0.0563	IKAROS family zinc finger 4 (Eos)								IKZF4	0.6155
1623	BSND	7809	0.6152	0.1495	Bartter syndrome, infantile, with sensorineural deafness (Barttin)								BSND	0.6152
1624	HIVEP3	59269	0.6152	0.0963	human immunodeficiency virus type I enhancer binding protein 3								HIVEP3	0.6152
1625	TSSC4	10078	0.6152	0.13	tumor suppressing subtransferable candidate 4								TSSC4	0.6152
1626	NKX2-3	159296	0.615	0.0056	NK2 homeobox 3								NKX2-3	0.615
1627	IQSEC2	23096	0.6149	0.225	IQ motif and Sec7 domain 2								IQSEC2	0.6149
1628	RNPEPL1	57140	0.6148	0.1913	arginyl aminopeptidase (aminopeptidase B)-like 1								RNPEPL1	0.6148
1629	ABCA17P	650655	0.6148	0.0213	ATP-binding cassette, sub-family A (ABC1), member 17, pseudogene								ABCA17P	0.6148
1630	ATAD3C	219293	0.6148	0.0253	ATPase family, AAA domain containing 3C								ATAD3C	0.6148
1631	LOC90834	90834	0.6147	0.0335	uncharacterized protein BC001742								LOC90834	0.6147
1632	IL20	50604	0.6147	0.0348	interleukin 20								IL20	0.6147
1633	SLC26A6	65010	0.6142	0.0612	solute carrier family 26, member 6								SLC26A6	0.6142
1634	EMX1	2016	0.6141	0.1829	empty spiracles homeobox 1								EMX1	0.6141
1635	OR1I1	126370	0.6141	0.184	olfactory receptor, family 1, subfamily I, member 1								OR1I1	0.6141
1636	HMX2	3167	0.614	0.0091	H6 family homeobox 2								HMX2	0.614
1637	FBRS	64319	0.6139	0.1721	fibrosin								FBRS	0.6139
1638	CFP	5199	0.6139	0.0983	complement factor properdin								CFP	0.6139
1639	IZUMO4	113177	0.6139	0.1061	IZUMO family member 4								IZUMO4	0.6139
1640	PDGFB	5155	0.6138	0.1543	platelet-derived growth factor beta polypeptide								PDGFB	0.6138
1641	MYO18B	84700	0.6136	0.0139	myosin XVIIIB								MYO18B	0.6136
1642	ADCK5	203054	0.6134	0.1064	aarF domain containing kinase 5								ADCK5	0.6134
1643	LOC146880	146880	0.6132	0	Rho GTPase activating protein 27 pseudogene								LOC146880	0.6132
1644	TRPV5	56302	0.6132	0.0841	transient receptor potential cation channel, subfamily V, member 5								TRPV5	0.6132
1645	MUSK	4593	0.6131	0.178	muscle, skeletal, receptor tyrosine kinase								MUSK	0.6131
1646	RGS12	6002	0.6129	0.1576	regulator of G-protein signaling 12								RGS12	0.6129
1647	ARHGAP30	257106	0.6126	0.0869	Rho GTPase activating protein 30								ARHGAP30	0.6126
1648	GSTA1	2938	0.6124	0.0098	glutathione S-transferase alpha 1								GSTA1	0.6124
1649	SLC5A12	159963	0.6122	0.0112	solute carrier family 5 (sodium/glucose cotransporter), member 12								SLC5A12	0.6122
1650	MOGAT3	346606	0.6121	0.0369	monoacylglycerol O-acyltransferase 3								MOGAT3	0.6121
1651	NRL	4901	0.6121	0.1737	neural retina leucine zipper								NRL	0.6121
1652	C1ORF68	100129271	0.612	0.1703	chromosome 1 open reading frame 68								C1ORF68	0.612
1653	LINC00628	127841	0.6118	0	long intergenic non-protein coding RNA 628								LINC00628	0.6118
1654	FLJ20712	55025	0.6115	0.1109	uncharacterized FLJ20712								FLJ20712	0.6115
1655	LFNG	3955	0.6115	0.0466	LFNG O-fucosylpeptide 3-beta-N-acetylglucosaminyltransferase								LFNG	0.6115
1656	IL16	3603	0.6115	0.1049	interleukin 16								IL16	0.6115
1657	SIM2	6493	0.6114	0.0409	single-minded homolog 2 (Drosophila)								SIM2	0.6114
1658	DNASE1	1773	0.6114	0.0252	deoxyribonuclease I								DNASE1	0.6114
1659	SLC6A7	6534	0.6113	0.1443	solute carrier family 6 (neurotransmitter transporter, L-proline), member 7								SLC6A7	0.6113
1660	SHANK2-AS3	220070	0.6113	0	SHANK2 antisense RNA 3 (non-protein coding)								SHANK2-AS3	0.6113
1661	SYNE4	163183	0.6112	0.0395	spectrin repeat containing, nuclear envelope family member 4								SYNE4	0.6112
1662	LILRB5	10990	0.6112	0.0611	leukocyte immunoglobulin-like receptor, subfamily B (with TM and ITIM domains), member 5								LILRB5	0.6112
1663	KIRREL2	84063	0.6111	0.0784	kin of IRRE like 2 (Drosophila)								KIRREL2	0.6111
1664	ASB16	92591	0.611	0.1545	ankyrin repeat and SOCS box containing 16								ASB16	0.611
1665	IL37	27178	0.6109	0.1381	interleukin 37								IL37	0.6109
1666	IRF7	3665	0.6108	0.0821	interferon regulatory factor 7								IRF7	0.6108
1667	ATP2A1	487	0.6107	0.0237	ATPase, Ca++ transporting, cardiac muscle, fast twitch 1								ATP2A1	0.6107
1668	BAI1	575	0.6106	0.2279	brain-specific angiogenesis inhibitor 1								BAI1	0.6106
1669	NPB	256933	0.6104	0.1373	neuropeptide B								NPB	0.6104
1670	AANAT	15	0.6103	0.0997	aralkylamine N-acetyltransferase								AANAT	0.6103
1671	FGF23	8074	0.6101	0.1837	fibroblast growth factor 23								FGF23	0.6101
1672	SPRN	503542	0.61	0.178	shadow of prion protein homolog (zebrafish)								SPRN	0.61
1673	ZFHX2	85446	0.6097	0.0727	zinc finger homeobox 2								ZFHX2	0.6097
1674	SFI1	9814	0.6096	0.0961	Sfi1 homolog, spindle assembly associated (yeast)								SFI1	0.6096
1675	GPR35	2859	0.6093	0.0895	G protein-coupled receptor 35								GPR35	0.6093
1676	CACNG5	27091	0.6092	0.2251	calcium channel, voltage-dependent, gamma subunit 5								CACNG5	0.6092
1677	CACNA1F	778	0.609	0.2322	calcium channel, voltage-dependent, L type, alpha 1F subunit								CACNA1F	0.609
1678	TXNRD2	10587	0.609	0.0966	thioredoxin reductase 2								TXNRD2	0.609
1679	SH3BP1	23616	0.6088	0.1889	SH3-domain binding protein 1								SH3BP1	0.6088
1680	DNAH2	146754	0.6087	0.0483	dynein, axonemal, heavy chain 2								DNAH2	0.6087
1681	LOC100131496	100131496	0.6087	0.018	uncharacterized LOC100131496								LOC100131496	0.6087
1682	CD40LG	959	0.6086	0.0948	CD40 ligand								CD40LG	0.6086
1683	SHROOM1	134549	0.6085	0.0551	shroom family member 1								SHROOM1	0.6085
1684	LOC93432	93432	0.6085	0.0867	maltase-glucoamylase (alpha-glucosidase) pseudogene								LOC93432	0.6085
1685	PLEKHG5	57449	0.6084	0.1405	pleckstrin homology domain containing, family G (with RhoGef domain) member 5								PLEKHG5	0.6084
1686	ZNF579	163033	0.6084	0.1429	zinc finger protein 579								ZNF579	0.6084
1687	PRG3	10394	0.6084	0.1163	proteoglycan 3								PRG3	0.6084
1688	KIF26B	55083	0.6082	0.0575	kinesin family member 26B								KIF26B	0.6082
1689	MSMB	4477	0.608	0.0059	microseminoprotein, beta-								MSMB	0.608
1690	GSX1	219409	0.608	0.0341	GS homeobox 1								GSX1	0.608
1691	ARR3	407	0.6079	0.1924	arrestin 3, retinal (X-arrestin)								ARR3	0.6079
1692	CPS1-IT1	29034	0.6079	0.0864	CPS1 intronic transcript 1 (non-protein coding)								CPS1-IT1	0.6079
1693	AACSP1	729522	0.6078	0	acetoacetyl-CoA synthetase pseudogene 1								AACSP1	0.6078
1694	BEST2	54831	0.6077	0.1686	bestrophin 2								BEST2	0.6077
1695	GSG1	83445	0.6076	0.0608	germ cell associated 1								GSG1	0.6076
1696	MZF1	7593	0.6075	0.126	myeloid zinc finger 1								MZF1	0.6075
1697	PLA2G2D	26279	0.6075	0.1793	phospholipase A2, group IID								PLA2G2D	0.6075
1698	TMEM86A	144110	0.6075	0.1119	transmembrane protein 86A								TMEM86A	0.6075
1699	C2ORF51	200523	0.6072	0.1321	chromosome 2 open reading frame 51								C2ORF51	0.6072
1700	IL15RA	3601	0.6071	0.0691	interleukin 15 receptor, alpha								IL15RA	0.6071
1701	POFUT2	23275	0.6071	0.1104	protein O-fucosyltransferase 2								POFUT2	0.6071
1702	ICAM4	3386	0.6068	0.0138	intercellular adhesion molecule 4 (Landsteiner-Wiener blood group)								ICAM4	0.6068
1703	LOC84931	84931	0.6068	0.1085	uncharacterized LOC84931								LOC84931	0.6068
1704	TTTY5	83863	0.6068	0.114	testis-specific transcript, Y-linked 5 (non-protein coding)								TTTY5	0.6068
1705	C17ORF50	146853	0.6068	0.082	chromosome 17 open reading frame 50								C17ORF50	0.6068
1706	APC2	10297	0.6067	0.2291	adenomatosis polyposis coli 2								APC2	0.6067
1707	GTSE1	51512	0.6064	0.1248	G-2 and S-phase expressed 1								GTSE1	0.6064
1708	IL36RN	26525	0.6064	0.1372	interleukin 36 receptor antagonist								IL36RN	0.6064
1709	PPIL2	23759	0.6064	0.177	peptidylprolyl isomerase (cyclophilin)-like 2								PPIL2	0.6064
1710	CRYBA4	1413	0.6064	0.1015	crystallin, beta A4								CRYBA4	0.6064
1711	LRRC71	149499	0.6064	0.068	leucine rich repeat containing 71								LRRC71	0.6064
1712	FLJ26850	400710	0.606	0.0242	FLJ26850 protein								FLJ26850	0.606
1713	DMRTA2	63950	0.6058	0.0487	DMRT-like family A2								DMRTA2	0.6058
1714	CLDN17	26285	0.6058	0.1749	claudin 17								CLDN17	0.6058
1715	TCL1B	9623	0.6057	0.0898	T-cell leukemia/lymphoma 1B								TCL1B	0.6057
1716	OSBPL5	114879	0.6056	0.0873	oxysterol binding protein-like 5								OSBPL5	0.6056
1717	GRAP	10750	0.6056	0.0751	GRB2-related adaptor protein								GRAP	0.6056
1718	SLA2	84174	0.6055	0.0709	Src-like-adaptor 2								SLA2	0.6055
1719	DLL4	54567	0.6055	0.109	delta-like 4 (Drosophila)								DLL4	0.6055
1720	GPR182	11318	0.6055	0.0704	G protein-coupled receptor 182								GPR182	0.6055
1721	ADAM6	8755	0.6053	0.0522	ADAM metallopeptidase domain 6 (pseudogene)								ADAM6	0.6053
1722	TBX21	30009	0.6052	0.0736	T-box 21								TBX21	0.6052
1723	TNNT2	7139	0.6049	0.0266	troponin T type 2 (cardiac)								TNNT2	0.6049
1724	GIP	2695	0.6049	0.0561	gastric inhibitory polypeptide								GIP	0.6049
1725	ADAMTS2	9509	0.6047	0.1822	ADAM metallopeptidase with thrombospondin type 1 motif, 2								ADAMTS2	0.6047
1726	PIN1P1	5301	0.6047	0.197	peptidylprolyl cis/trans isomerase, NIMA-interacting 1 pseudogene 1								PIN1P1	0.6047
1727	MAGEA5	4104	0.6046	0.0089	melanoma antigen family A, 5								MAGEA5	0.6046
1728	VAX2	25806	0.6046	0.0693	ventral anterior homeobox 2								VAX2	0.6046
1729	PSTPIP1	9051	0.6044	0.0941	proline-serine-threonine phosphatase interacting protein 1								PSTPIP1	0.6044
1730	ZBTB17	7709	0.6044	0.1409	zinc finger and BTB domain containing 17								ZBTB17	0.6044
1731	CELSR1	9620	0.6043	0.0252	cadherin, EGF LAG seven-pass G-type receptor 1 (flamingo homolog, Drosophila)								CELSR1	0.6043
1732	P2RX6	9127	0.6043	0.1394	purinergic receptor P2X, ligand-gated ion channel, 6								P2RX6	0.6043
1733	EMID1	129080	0.6043	0.1546	EMI domain containing 1								EMID1	0.6043
1734	PGF	5228	0.6042	0.0527	placental growth factor								PGF	0.6042
1735	TBC1D2	55357	0.6041	0.0724	TBC1 domain family, member 2								TBC1D2	0.6041
1736	B4GALNT2	124872	0.604	0.0581	beta-1,4-N-acetyl-galactosaminyl transferase 2								B4GALNT2	0.604
1737	C10ORF99	387695	0.6039	0.1116	chromosome 10 open reading frame 99								C10ORF99	0.6039
1738	FUZ	80199	0.6039	0.105	fuzzy homolog (Drosophila)								FUZ	0.6039
1739	RAB17	64284	0.6037	0.0503	RAB17, member RAS oncogene family								RAB17	0.6037
1740	CCL1	6346	0.6036	0.1149	chemokine (C-C motif) ligand 1								CCL1	0.6036
1741	SRRM2-AS1	100128788	0.6035	0	SRRM2 antisense RNA 1 (non-protein coding)								SRRM2-AS1	0.6035
1742	VWA5B1	127731	0.6035	0.1249	von Willebrand factor A domain containing 5B1								VWA5B1	0.6035
1743	SLC2A4	6517	0.6033	0.0972	solute carrier family 2 (facilitated glucose transporter), member 4								SLC2A4	0.6033
1744	TGIF2	60436	0.6033	0.0503	TGFB-induced factor homeobox 2								TGIF2	0.6033
1745	SPATA25	128497	0.6033	0.0669	spermatogenesis associated 25								SPATA25	0.6033
1746	ADAM30	11085	0.6031	0.1371	ADAM metallopeptidase domain 30								ADAM30	0.6031
1747	HSH2D	84941	0.603	0.0413	hematopoietic SH2 domain containing								HSH2D	0.603
1748	KLF14	136259	0.603	0.1531	Kruppel-like factor 14								KLF14	0.603
1749	GGTLC1	92086	0.6029	0.0201	gamma-glutamyltransferase light chain 1								GGTLC1	0.6029
1750	SOX14	8403	0.6029	0.0557	SRY (sex determining region Y)-box 14								SOX14	0.6029
1751	FAM212A	389119	0.6028	0.0694	family with sequence similarity 212, member A								FAM212A	0.6028
1752	2022-03-10	162333	0.6028	0.0253	membrane-associated ring finger (C3HC4) 10, E3 ubiquitin protein ligase								2022-03-10	0.6028
1753	GRAP2	9402	0.6027	0.0817	GRB2-related adaptor protein 2								GRAP2	0.6027
1754	ALOXE3	59344	0.6027	0.2011	arachidonate lipoxygenase 3								ALOXE3	0.6027
1755	LHX4	89884	0.6024	0.0368	LIM homeobox 4								LHX4	0.6024
1756	ODF3L1	161753	0.6022	0.018	outer dense fiber of sperm tails 3-like 1								ODF3L1	0.6022
1757	LOC729121	729121	0.6021	0.0311	uncharacterized LOC729121								LOC729121	0.6021
1758	RSG1	79363	0.6021	0.1252	REM2 and RAB-like small GTPase 1								RSG1	0.6021
1759	LINC00474	58483	0.6021	0.0669	long intergenic non-protein coding RNA 474								LINC00474	0.6021
1760	LRRC46	90506	0.6019	0.0331	leucine rich repeat containing 46								LRRC46	0.6019
1761	APOA2	336	0.6018	0.0267	apolipoprotein A-II								APOA2	0.6018
1762	GRIK5	2901	0.6018	0.2556	glutamate receptor, ionotropic, kainate 5								GRIK5	0.6018
1763	ADORA1	134	0.6018	0.1935	adenosine A1 receptor								ADORA1	0.6018
1764	FBXL6	26233	0.6015	0.1401	F-box and leucine-rich repeat protein 6								FBXL6	0.6015
1765	STH	246744	0.6014	0.0698	saitohin								STH	0.6014
1766	SLC34A3	142680	0.6014	0.1941	solute carrier family 34 (sodium phosphate), member 3								SLC34A3	0.6014
1767	CHRNA2	1135	0.6013	0.217	cholinergic receptor, nicotinic, alpha 2 (neuronal)								CHRNA2	0.6013
1768	CDH26	60437	0.6012	0.0118	cadherin 26								CDH26	0.6012
1769	GLI1	2735	0.6012	0.1165	GLI family zinc finger 1								GLI1	0.6012
1770	GJB5	2709	0.6012	0.0689	gap junction protein, beta 5, 31.1kDa								GJB5	0.6012
1771	AVIL	10677	0.6012	0.0478	advillin								AVIL	0.6012
1772	RIMS4	140730	0.6011	0.1578	regulating synaptic membrane exocytosis 4								RIMS4	0.6011
1773	ROBO3	64221	0.6008	0.0454	roundabout, axon guidance receptor, homolog 3 (Drosophila)								ROBO3	0.6008
1774	ALOX15B	247	0.6008	0.1754	arachidonate 15-lipoxygenase, type B								ALOX15B	0.6008
1775	COLQ	8292	0.6007	0.0596	collagen-like tail subunit (single strand of homotrimer) of asymmetric acetylcholinesterase								COLQ	0.6007
1776	OPRL1	4987	0.6005	0.213	opiate receptor-like 1								OPRL1	0.6005
1777	SIRT6	51548	0.6004	0.1614	sirtuin 6								SIRT6	0.6004
1778	MPO	4353	0.6004	0.098	myeloperoxidase								MPO	0.6004
1779	PDIA2	64714	0.6003	0.0839	protein disulfide isomerase family A, member 2								PDIA2	0.6003
1780	MXD3	83463	0.6002	0.1163	MAX dimerization protein 3								MXD3	0.6002
1781	POLL	27343	0.6002	0.1707	polymerase (DNA directed), lambda								POLL	0.6002
1782	VMO1	284013	0.6001	0.0383	vitelline membrane outer layer 1 homolog (chicken)								VMO1	0.6001
1783	TP53TG5	27296	0.6	0.1861	TP53 target 5								TP53TG5	0.6
1784	FCER2	2208	0.6	0.1118	Fc fragment of IgE, low affinity II, receptor for (CD23)								FCER2	0.6
1785	KLKB1	3818	0.5999	0.048	kallikrein B, plasma (Fletcher factor) 1								KLKB1	0.5999
1786	SPAG8	26206	0.5999	0.0836	sperm associated antigen 8								SPAG8	0.5999
1787	TTTY13	83868	0.5998	0.0201	testis-specific transcript, Y-linked 13 (non-protein coding)								TTTY13	0.5998
1788	PAGE1	8712	0.5997	0.0407	P antigen family, member 1 (prostate associated)								PAGE1	0.5997
1789	NAB2	4665	0.5996	0.0838	NGFI-A binding protein 2 (EGR1 binding protein 2)								NAB2	0.5996
1790	HLA-DQB2	3120	0.5996	0.0441	major histocompatibility complex, class II, DQ beta 2								HLA-DQB2	0.5996
1791	KIF26A	26153	0.5996	0.042	kinesin family member 26A								KIF26A	0.5996
1792	CD6	923	0.5995	0.2228	CD6 molecule								CD6	0.5995
1793	SEL1L2	80343	0.5995	0.0318	sel-1 suppressor of lin-12-like 2 (C. elegans)								SEL1L2	0.5995
1794	MAGIX	79917	0.5993	0.1546	MAGI family member, X-linked								MAGIX	0.5993
1795	ABCB11	8647	0.5992	0.1286	ATP-binding cassette, sub-family B (MDR/TAP), member 11								ABCB11	0.5992
1796	HRCT1	646962	0.5991	0.0227	histidine rich carboxyl terminus 1								HRCT1	0.5991
1797	C9ORF131	138724	0.5991	0.1048	chromosome 9 open reading frame 131								C9ORF131	0.5991
1798	TUT1	64852	0.599	0.1492	terminal uridylyl transferase 1, U6 snRNA-specific								TUT1	0.599
1799	LZTS1	11178	0.599	0.2289	leucine zipper, putative tumor suppressor 1								LZTS1	0.599
1800	LOC152024	152024	0.5989	0.0163	uncharacterized LOC152024								LOC152024	0.5989
1801	TCP11	6954	0.5989	0.0591	t-complex 11 homolog (mouse)								TCP11	0.5989
1802	CYP17A1	1586	0.5988	0.173	cytochrome P450, family 17, subfamily A, polypeptide 1								CYP17A1	0.5988
1803	PANX2	56666	0.5986	0.1613	pannexin 2								PANX2	0.5986
1804	C10ORF108	414235	0.5985	0.1263	chromosome 10 open reading frame 108								C10ORF108	0.5985
1805	EGLN2	112398	0.5985	0.1238	egl nine homolog 2 (C. elegans)								EGLN2	0.5985
1806	HOXC13	3229	0.5984	0.0368	homeobox C13								HOXC13	0.5984
1807	FSHB	2488	0.5981	0.0417	follicle stimulating hormone, beta polypeptide								FSHB	0.5981
1808	ITIH6	347365	0.598	0.1407	inter-alpha-trypsin inhibitor heavy chain family, member 6								ITIH6	0.598
1809	AHSP	51327	0.5979	0.0586	alpha hemoglobin stabilizing protein								AHSP	0.5979
1810	KRT81	3887	0.5979	0.1022	keratin 81								KRT81	0.5979
1811	HOXB1	3211	0.5979	0.2097	homeobox B1								HOXB1	0.5979
1812	LY6G6C	80740	0.5978	0.1836	lymphocyte antigen 6 complex, locus G6C								LY6G6C	0.5978
1813	C20ORF195	79025	0.5975	0.0777	chromosome 20 open reading frame 195								C20ORF195	0.5975
1814	LINC00483	55018	0.5975	0.0247	long intergenic non-protein coding RNA 483								LINC00483	0.5975
1815	MIP	4284	0.5973	0.1243	major intrinsic protein of lens fiber								MIP	0.5973
1816	RBMXL2	27288	0.5971	0.0348	RNA binding motif protein, X-linked-like 2								RBMXL2	0.5971
1817	PADI4	23569	0.5971	0.1121	peptidyl arginine deiminase, type IV								PADI4	0.5971
1818	WIZ	58525	0.5969	0.1875	widely interspaced zinc finger motifs								WIZ	0.5969
1819	TCL1A	8115	0.5969	0.0901	T-cell leukemia/lymphoma 1A								TCL1A	0.5969
1820	SLC22A11	55867	0.5968	0.1863	solute carrier family 22 (organic anion/urate transporter), member 11								SLC22A11	0.5968
1821	HLX	3142	0.5966	0.0726	H2.0-like homeobox								HLX	0.5966
1822	CACNA1S	779	0.5965	0.1626	calcium channel, voltage-dependent, L type, alpha 1S subunit								CACNA1S	0.5965
1823	POU2F3	25833	0.5965	0.0114	POU class 2 homeobox 3								POU2F3	0.5965
1824	BARHL1	56751	0.5964	0.1675	BarH-like homeobox 1								BARHL1	0.5964
1825	BCORL1	63035	0.5963	0.1139	BCL6 corepressor-like 1								BCORL1	0.5963
1826	NPBWR2	2832	0.5963	0.0997	neuropeptides B/W receptor 2								NPBWR2	0.5963
1827	PODN	127435	0.5961	0.1159	podocan								PODN	0.5961
1828	CREB3L3	84699	0.596	0.0225	cAMP responsive element binding protein 3-like 3								CREB3L3	0.596
1829	TAZ	6901	0.5958	0.1834	tafazzin								TAZ	0.5958
1830	LOC100131138	100131138	0.5957	0.054	uncharacterized LOC100131138								LOC100131138	0.5957
1831	CCDC22	28952	0.5957	0.143	coiled-coil domain containing 22								CCDC22	0.5957
1832	SCRN2	90507	0.5951	0.1084	secernin 2								SCRN2	0.5951
1833	MST1R	4486	0.5951	0.0809	macrophage stimulating 1 receptor (c-met-related tyrosine kinase)								MST1R	0.5951
1834	NKX3-1	4824	0.5949	0.157	NK3 homeobox 1								NKX3-1	0.5949
1835	LMTK3	114783	0.5949	0.1038	lemur tyrosine kinase 3								LMTK3	0.5949
1836	HTA	283902	0.5947	0	uncharacterized LOC283902								HTA	0.5947
1837	KRTAP4-7	100132476	0.5947	0	keratin associated protein 4-7								KRTAP4-7	0.5947
1838	POU3F1	5453	0.5946	0.1815	POU class 3 homeobox 1								POU3F1	0.5946
1839	HEYL	26508	0.5946	0.2182	hairy/enhancer-of-split related with YRPW motif-like								HEYL	0.5946
1840	SPEF1	25876	0.5945	0.1969	sperm flagellar 1								SPEF1	0.5945
1841	HTR3A	3359	0.5944	0.1947	5-hydroxytryptamine (serotonin) receptor 3A, ionotropic								HTR3A	0.5944
1842	CCIN	881	0.5943	0.1664	calicin								CCIN	0.5943
1843	PCDH12	51294	0.5943	0.1162	protocadherin 12								PCDH12	0.5943
1844	KLHL17	339451	0.5943	0.0938	kelch-like 17 (Drosophila)								KLHL17	0.5943
1845	OMP	4975	0.5941	0.0915	olfactory marker protein								OMP	0.5941
1846	FAM47B	170062	0.5939	0.0066	family with sequence similarity 47, member B								FAM47B	0.5939
1847	LOC100126784	100126784	0.5939	0.1084	uncharacterized LOC100126784								LOC100126784	0.5939
1848	PGC	5225	0.5935	0.1857	progastricsin (pepsinogen C)								PGC	0.5935
1849	ALOX12B	242	0.5935	0.1187	arachidonate 12-lipoxygenase, 12R type								ALOX12B	0.5935
1850	TNP2	7142	0.5934	0.1079	transition protein 2 (during histone to protamine replacement)								TNP2	0.5934
1851	NACC1	112939	0.5934	0.1404	nucleus accumbens associated 1, BEN and BTB (POZ) domain containing								NACC1	0.5934
1852	RCE1	9986	0.5933	0.1035	RCE1 homolog, prenyl protein protease (S. cerevisiae)								RCE1	0.5933
1853	BCL3	602	0.5931	0.1152	B-cell CLL/lymphoma 3								BCL3	0.5931
1854	IGHMBP2	3508	0.5931	0.1735	immunoglobulin mu binding protein 2								IGHMBP2	0.5931
1855	HDC	3067	0.5931	0.0596	histidine decarboxylase								HDC	0.5931
1856	IQCF5	389124	0.593	0.0622	IQ motif containing F5								IQCF5	0.593
1857	IL21R	50615	0.593	0.0644	interleukin 21 receptor								IL21R	0.593
1858	NTRK1	4914	0.5929	0.0803	neurotrophic tyrosine kinase, receptor, type 1								NTRK1	0.5929
1859	EPHB3	2049	0.5929	0.1138	EPH receptor B3								EPHB3	0.5929
1860	ANKRD2	26287	0.5927	0.1116	ankyrin repeat domain 2 (stretch responsive muscle)								ANKRD2	0.5927
1861	COL6A1	1291	0.5925	0.1572	collagen, type VI, alpha 1								COL6A1	0.5925
1862	CDX4	1046	0.5925	0.1659	caudal type homeobox 4								CDX4	0.5925
1863	FAM129B	64855	0.5924	0.1407	family with sequence similarity 129, member B								FAM129B	0.5924
1864	RDH8	50700	0.5923	0.1596	retinol dehydrogenase 8 (all-trans)								RDH8	0.5923
1865	GHRHR	2692	0.5923	0.1617	growth hormone releasing hormone receptor								GHRHR	0.5923
1866	CIB3	117286	0.5921	0.1354	calcium and integrin binding family member 3								CIB3	0.5921
1867	GPSM1	26086	0.592	0.1033	G-protein signaling modulator 1								GPSM1	0.592
1868	SLC16A11	162515	0.5918	0.1462	solute carrier family 16, member 11 (monocarboxylic acid transporter 11)								SLC16A11	0.5918
1869	CNKSR1	10256	0.5915	0.0361	connector enhancer of kinase suppressor of Ras 1								CNKSR1	0.5915
1870	C10ORF95	79946	0.5914	0.1292	chromosome 10 open reading frame 95								C10ORF95	0.5914
1871	CLCN2	1181	0.5914	0.0588	chloride channel, voltage-sensitive 2								CLCN2	0.5914
1872	OPLAH	26873	0.5913	0.076	5-oxoprolinase (ATP-hydrolysing)								OPLAH	0.5913
1873	CCDC116	164592	0.5913	0.125	coiled-coil domain containing 116								CCDC116	0.5913
1874	UMOD	7369	0.5908	0.1452	uromodulin								UMOD	0.5908
1875	ATP2C2	9914	0.5906	0.0692	ATPase, Ca++ transporting, type 2C, member 2								ATP2C2	0.5906
1876	C8A	731	0.5906	0.1672	complement component 8, alpha polypeptide								C8A	0.5906
1877	FOXN1	8456	0.5905	0.2102	forkhead box N1								FOXN1	0.5905
1878	FCRL2	79368	0.5904	0.0501	Fc receptor-like 2								FCRL2	0.5904
1879	SSH3	54961	0.5904	0.1361	slingshot homolog 3 (Drosophila)								SSH3	0.5904
1880	CPLX3	594855	0.5901	0.218	complexin 3								CPLX3	0.5901
1881	CSNK1G2	1455	0.5901	0.1404	casein kinase 1, gamma 2								CSNK1G2	0.5901
1882	TRIM11	81559	0.59	0.0999	tripartite motif containing 11								TRIM11	0.59
1883	SNAPC2	6618	0.5899	0.167	small nuclear RNA activating complex, polypeptide 2, 45kDa								SNAPC2	0.5899
1884	COX6B2	125965	0.5899	0.1552	cytochrome c oxidase subunit VIb polypeptide 2 (testis)								COX6B2	0.5899
1885	EGOT	100126791	0.5899	0.1664	eosinophil granule ontogeny transcript (non-protein coding)								EGOT	0.5899
1886	PNPLA7	375775	0.5897	0.1316	patatin-like phospholipase domain containing 7								PNPLA7	0.5897
1887	LEP	3952	0.5897	0.0282	leptin								LEP	0.5897
1888	ILDR1	286676	0.5896	0.046	immunoglobulin-like domain containing receptor 1								ILDR1	0.5896
1889	GLYCTK	132158	0.5896	0.0901	glycerate kinase								GLYCTK	0.5896
1890	SPTB	6710	0.5896	0.2523	spectrin, beta, erythrocytic								SPTB	0.5896
1891	AMICA1	120425	0.5895	0.074	adhesion molecule, interacts with CXADR antigen 1								AMICA1	0.5895
1892	MIXL1	83881	0.5894	0.1126	Mix paired-like homeobox								MIXL1	0.5894
1893	KAZALD1	81621	0.5893	0.0655	Kazal-type serine peptidase inhibitor domain 1								KAZALD1	0.5893
1894	FAM151A	338094	0.5891	0.039	family with sequence similarity 151, member A								FAM151A	0.5891
1895	PKD1L1	168507	0.589	0.0331	polycystic kidney disease 1 like 1								PKD1L1	0.589
1896	SH2B2	10603	0.589	0.0836	SH2B adaptor protein 2								SH2B2	0.589
1897	LINC00051	619434	0.5888	0	long intergenic non-protein coding RNA 51								LINC00051	0.5888
1898	UBE2DNL	100131816	0.5888	0.1368	ubiquitin-conjugating enzyme E2D N-terminal like (pseudogene)								UBE2DNL	0.5888
1899	LINC00593	414926	0.5888	0.19	long intergenic non-protein coding RNA 593								LINC00593	0.5888
1900	PMEL	6490	0.5886	0.0962	premelanosome protein								PMEL	0.5886
1901	SOX3	6658	0.5885	0.1172	SRY (sex determining region Y)-box 3								SOX3	0.5885
1902	TRPM4	54795	0.5885	0.085	transient receptor potential cation channel, subfamily M, member 4								TRPM4	0.5885
1903	GATA2	2624	0.588	0.0305	GATA binding protein 2								GATA2	0.588
1904	LOC100130111	100130111	0.588	0	uncharacterized LOC100130111								LOC100130111	0.588
1905	HEATR7B2	133558	0.588	0.1371	HEAT repeat family member 7B2								HEATR7B2	0.588
1906	HDAC7	51564	0.5879	0.1424	histone deacetylase 7								HDAC7	0.5879
1907	TGM4	7047	0.5878	0.194	transglutaminase 4 (prostate)								TGM4	0.5878
1908	AFAP1-AS1	84740	0.5878	0.1132	AFAP1 antisense RNA 1 (non-protein coding)								AFAP1-AS1	0.5878
1909	C16ORF48	84080	0.5878	0.0732	chromosome 16 open reading frame 48								C16ORF48	0.5878
1910	ZCWPW1	55063	0.5877	0.1069	zinc finger, CW type with PWWP domain 1								ZCWPW1	0.5877
1911	PLD2	5338	0.5876	0.1926	phospholipase D2								PLD2	0.5876
1912	C2CD4C	126567	0.5876	0.1789	C2 calcium-dependent domain containing 4C								C2CD4C	0.5876
1913	HAAO	23498	0.5875	0.1296	3-hydroxyanthranilate 3,4-dioxygenase								HAAO	0.5875
1914	RTP3	83597	0.5874	0.1095	receptor (chemosensory) transporter protein 3								RTP3	0.5874
1915	ATPAF1-AS1	374973	0.5874	0.1153	ATPAF1 antisense RNA 1 (non-protein coding)								ATPAF1-AS1	0.5874
1916	DKFZP434A062	26102	0.5873	0.28	uncharacterized LOC26102								DKFZP434A062	0.5873
1917	LAMB4	22798	0.5871	0.0808	laminin, beta 4								LAMB4	0.5871
1918	EXTL1	2134	0.5871	0.222	exostoses (multiple)-like 1								EXTL1	0.5871
1919	BFSP2	8419	0.5869	0.0546	beaded filament structural protein 2, phakinin								BFSP2	0.5869
1920	ATP2A3	489	0.5869	0.1029	ATPase, Ca++ transporting, ubiquitous								ATP2A3	0.5869
1921	REXO1	57455	0.5866	0.103	REX1, RNA exonuclease 1 homolog (S. cerevisiae)								REXO1	0.5866
1922	ZNF408	79797	0.5866	0.1432	zinc finger protein 408								ZNF408	0.5866
1923	LRTM1	57408	0.5865	0.2048	leucine-rich repeats and transmembrane domains 1								LRTM1	0.5865
1924	ARFGAP1	55738	0.5865	0.1707	ADP-ribosylation factor GTPase activating protein 1								ARFGAP1	0.5865
1925	WNT4	54361	0.5865	0.0869	wingless-type MMTV integration site family, member 4								WNT4	0.5865
1926	KRBA1	84626	0.5864	0.1384	KRAB-A domain containing 1								KRBA1	0.5864
1927	GALNT9	50614	0.5861	0.1212	UDP-N-acetyl-alpha-D-galactosamine:polypeptide N-acetylgalactosaminyltransferase 9 (GalNAc-T9)								GALNT9	0.5861
1928	ELF5	2001	0.5861	0.0552	E74-like factor 5 (ets domain transcription factor)								ELF5	0.5861
1929	C19ORF33	64073	0.586	0.0303	chromosome 19 open reading frame 33								C19ORF33	0.586
1930	LMOD3	56203	0.586	0.0255	leiomodin 3 (fetal)								LMOD3	0.586
1931	ZP1	22917	0.586	0.0219	zona pellucida glycoprotein 1 (sperm receptor)								ZP1	0.586
1932	C1ORF177	163747	0.586	0.0727	chromosome 1 open reading frame 177								C1ORF177	0.586
1933	ELANE	1991	0.586	0.0764	elastase, neutrophil expressed								ELANE	0.586
1934	B4GALNT3	283358	0.5856	0.1578	beta-1,4-N-acetyl-galactosaminyl transferase 3								B4GALNT3	0.5856
1935	PPP1R32	220004	0.5854	0.0852	protein phosphatase 1, regulatory subunit 32								PPP1R32	0.5854
1936	EFNA2	1943	0.5854	0.1465	ephrin-A2								EFNA2	0.5854
1937	PLAU	5328	0.5852	0.0874	plasminogen activator, urokinase								PLAU	0.5852
1938	C20ORF173	140873	0.5851	0.0997	chromosome 20 open reading frame 173								C20ORF173	0.5851
1939	TCF21	6943	0.5851	0.0663	transcription factor 21								TCF21	0.5851
1940	C15ORF39	56905	0.5851	0.1101	chromosome 15 open reading frame 39								C15ORF39	0.5851
1941	CNGA4	1262	0.5849	0.0152	cyclic nucleotide gated channel alpha 4								CNGA4	0.5849
1942	C17ORF82	388407	0.5846	0.2048	chromosome 17 open reading frame 82								C17ORF82	0.5846
1943	WFIKKN2	124857	0.5845	0.1478	WAP, follistatin/kazal, immunoglobulin, kunitz and netrin domain containing 2								WFIKKN2	0.5845
1944	MEOX1	4222	0.5844	0.0185	mesenchyme homeobox 1								MEOX1	0.5844
1945	NLRP4	147945	0.5844	0.0293	NLR family, pyrin domain containing 4								NLRP4	0.5844
1946	CIDEC	63924	0.5842	0.0534	cell death-inducing DFFA-like effector c								CIDEC	0.5842
1947	APOF	319	0.5842	0.0093	apolipoprotein F								APOF	0.5842
1948	AMZ1	155185	0.5841	0.2043	archaelysin family metallopeptidase 1								AMZ1	0.5841
1949	LINGO3	645191	0.584	0.2375	leucine rich repeat and Ig domain containing 3								LINGO3	0.584
1950	ADRA1D	146	0.5839	0.2603	adrenoceptor alpha 1D								ADRA1D	0.5839
1951	ZDHHC8	29801	0.5839	0.0986	zinc finger, DHHC-type containing 8								ZDHHC8	0.5839
1952	CHST5	23563	0.5838	0.1721	carbohydrate (N-acetylglucosamine 6-O) sulfotransferase 5								CHST5	0.5838
1953	CCDC8	83987	0.5838	0.0611	coiled-coil domain containing 8								CCDC8	0.5838
1954	FGB	2244	0.5837	0.0487	fibrinogen beta chain								FGB	0.5837
1955	TTLL9	164395	0.5835	0.1938	tubulin tyrosine ligase-like family, member 9								TTLL9	0.5835
1956	KRTDAP	388533	0.5835	0.0237	keratinocyte differentiation-associated protein								KRTDAP	0.5835
1957	ANKLE1	126549	0.5835	0.0219	ankyrin repeat and LEM domain containing 1								ANKLE1	0.5835
1958	C20ORF201	198437	0.5834	0.1313	chromosome 20 open reading frame 201								C20ORF201	0.5834
1959	ATXN2L	11273	0.5833	0.1497	ataxin 2-like								ATXN2L	0.5833
1960	LINC00112	54089	0.5831	0	long intergenic non-protein coding RNA 112								LINC00112	0.5831
1961	SLC46A2	57864	0.5831	0.0244	solute carrier family 46, member 2								SLC46A2	0.5831
1962	ODF4	146852	0.5831	0.1173	outer dense fiber of sperm tails 4								ODF4	0.5831
1963	SIGLEC6	946	0.5831	0.1374	sialic acid binding Ig-like lectin 6								SIGLEC6	0.5831
1964	IL4	3565	0.5829	0.0831	interleukin 4								IL4	0.5829
1965	FBN3	84467	0.5829	0.1385	fibrillin 3								FBN3	0.5829
1966	LOC100128139	100128139	0.5828	0.0176	uncharacterized LOC100128139								LOC100128139	0.5828
1967	OR10H1	26539	0.5828	0.1493	olfactory receptor, family 10, subfamily H, member 1								OR10H1	0.5828
1968	FLYWCH2	114984	0.5828	0.1011	FLYWCH family member 2								FLYWCH2	0.5828
1969	CTSW	1521	0.5827	0.0675	cathepsin W								CTSW	0.5827
1970	GJA5	2702	0.5826	0.0748	gap junction protein, alpha 5, 40kDa								GJA5	0.5826
1971	ZACN	353174	0.5825	0.0114	zinc activated ligand-gated ion channel								ZACN	0.5825
1972	IER5L	389792	0.5822	0.0772	immediate early response 5-like								IER5L	0.5822
1973	CLCN7	1186	0.5822	0.2263	chloride channel, voltage-sensitive 7								CLCN7	0.5822
1974	TEX101	83639	0.5821	0.0442	testis expressed 101								TEX101	0.5821
1975	DRD2	1813	0.5821	0.2836	dopamine receptor D2								DRD2	0.5821
1976	NT5M	56953	0.5818	0.1314	5',3'-nucleotidase, mitochondrial								NT5M	0.5818
1977	TAL2	6887	0.5815	0.1307	T-cell acute lymphocytic leukemia 2								TAL2	0.5815
1978	IGSF9	57549	0.5815	0.07	immunoglobulin superfamily, member 9								IGSF9	0.5815
1979	C5ORF46	389336	0.5815	0.0278	chromosome 5 open reading frame 46								C5ORF46	0.5815
1980	DNAH10	196385	0.5815	0.163	dynein, axonemal, heavy chain 10								DNAH10	0.5815
1981	CHIA	27159	0.5814	0.1527	chitinase, acidic								CHIA	0.5814
1982	TG	7038	0.5813	0.1749	thyroglobulin								TG	0.5813
1983	TMPRSS2	7113	0.5812	0.1123	transmembrane protease, serine 2								TMPRSS2	0.5812
1984	CEACAM1	634	0.5812	0.0848	carcinoembryonic antigen-related cell adhesion molecule 1 (biliary glycoprotein)								CEACAM1	0.5812
1985	NTF3	4908	0.5812	0.0961	neurotrophin 3								NTF3	0.5812
1986	WDR93	56964	0.5811	0.142	WD repeat domain 93								WDR93	0.5811
1987	CSF1	1435	0.581	0.2322	colony stimulating factor 1 (macrophage)								CSF1	0.581
1988	RNF17	56163	0.5808	0.1142	ring finger protein 17								RNF17	0.5808
1989	LCNL1	401562	0.5808	0.2113	lipocalin-like 1								LCNL1	0.5808
1990	FAM110A	83541	0.5807	0.0719	family with sequence similarity 110, member A								FAM110A	0.5807
1991	RCN3	57333	0.5804	0.1376	reticulocalbin 3, EF-hand calcium binding domain								RCN3	0.5804
1992	TMEM190	147744	0.5803	0.1436	transmembrane protein 190								TMEM190	0.5803
1993	GIPC3	126326	0.5803	0.1698	GIPC PDZ domain containing family, member 3								GIPC3	0.5803
1994	LINC00582	100287814	0.58	0	long intergenic non-protein coding RNA 582								LINC00582	0.58
1995	CLDN6	9074	0.5799	0.088	claudin 6								CLDN6	0.5799
[truncated: 15,867 more rows]

## Sheet: TGM2
Query genes:
Query Gene	Entrez ID	Coexpression Score	P-Value	Description
TGM2	7052	-3.2	0.002	transglutaminase 2 (C polypeptide, protein-glutamine-gamma-glutamyltransferase)
Coexpressed genes:
Rank	Gene	Entrez ID	Coexpression Score	P-Value	Description
1	IFITM3	10410	1.4337	0.0002	interferon induced transmembrane protein 3							IFITM3	1.4337
2	LRRC32	2615	1.3267	0.0001	leucine rich repeat containing 32							LRRC32	1.3267
3	IFITM1	8519	1.3087	0.0002	interferon induced transmembrane protein 1							IFITM1	1.3087
4	ENG	2022	1.3036	0.0004	endoglin							ENG	1.3036
5	IL4R	3566	1.2892	0.0002	interleukin 4 receptor							IL4R	1.2892
6	ACSL5	51703	1.2707	0	acyl-CoA synthetase long-chain family member 5							ACSL5	1.2707
7	IFITM2	10581	1.2609	0.0002	interferon induced transmembrane protein 2							IFITM2	1.2609
8	FXYD5	53827	1.2232	0.0005	FXYD domain containing ion transport regulator 5							FXYD5	1.2232
9	ITGA5	3678	1.2222	0.0025	integrin, alpha 5 (fibronectin receptor, alpha polypeptide)							ITGA5	1.2222
10	FAM129B	64855	1.2017	0.0021	family with sequence similarity 129, member B							FAM129B	1.2017
11	TAGLN2	8407	1.1926	0.0007	transgelin 2							TAGLN2	1.1926
12	EPAS1	2034	1.1921	0.0006	endothelial PAS domain protein 1							EPAS1	1.1921
13	BGN	633	1.1807	0.0028	biglycan							BGN	1.1807
14	EHD2	30846	1.1667	0.0154	EH-domain containing 2							EHD2	1.1667
15	RHOC	389	1.1647	0.0041	ras homolog family member C							RHOC	1.1647
16	LTBR	4055	1.1624	0.0007	lymphotoxin beta receptor (TNFR superfamily, member 3)							LTBR	1.1624
17	TNFRSF6B	8771	1.1543	0	tumor necrosis factor receptor superfamily, member 6b, decoy							TNFRSF6B	1.1543
18	SLCO4A1	28231	1.1533	0.0001	solute carrier organic anion transporter family, member 4A1							SLCO4A1	1.1533
19	HLA-E	3133	1.1511	0.0124	major histocompatibility complex, class I, E							HLA-E	1.1511
20	C10ORF10	11067	1.1466	0.0003	chromosome 10 open reading frame 10							C10ORF10	1.1466
21	MYH9	4627	1.1424	0.0093	myosin, heavy chain 9, non-muscle							MYH9	1.1424
22	SOCS3	9021	1.1383	0.0026	suppressor of cytokine signaling 3							SOCS3	1.1383
23	MT2A	4502	1.1361	0.0005	metallothionein 2A							MT2A	1.1361
24	S100A11	6282	1.1313	0.0045	S100 calcium binding protein A11							S100A11	1.1313
25	MYOF	26509	1.1299	0.0037	myoferlin							MYOF	1.1299
26	CFB	629	1.1194	0.0012	complement factor B							CFB	1.1194
27	TIMP1	7076	1.1152	0.0045	TIMP metallopeptidase inhibitor 1							TIMP1	1.1152
28	TNFRSF1A	7132	1.1146	0.0028	tumor necrosis factor receptor superfamily, member 1A							TNFRSF1A	1.1146
29	ECE1	1889	1.1144	0.0066	endothelin converting enzyme 1							ECE1	1.1144
30	CLIC1	1192	1.1103	0.0069	chloride intracellular channel 1							CLIC1	1.1103
31	GBP2	2634	1.1033	0.0042	guanylate binding protein 2, interferon-inducible							GBP2	1.1033
32	TM4SF1	4071	1.1022	0.0004	transmembrane 4 L six family member 1							TM4SF1	1.1022
33	ICAM2	3384	1.0905	0.0005	intercellular adhesion molecule 2							ICAM2	1.0905
34	PLA1A	51365	1.0854	0	phospholipase A1 member A							PLA1A	1.0854
35	GIMAP5	55340	1.0845	0.0036	GTPase, IMAP family member 5							GIMAP5	1.0845
36	RRAS	6237	1.0827	0.011	related RAS viral (r-ras) oncogene homolog							RRAS	1.0827
37	FLNA	2316	1.0795	0.0133	filamin A, alpha							FLNA	1.0795
38	CSDA	8531	1.0791	0	cold shock domain protein A							CSDA	1.0791
39	SLC16A3	9123	1.0789	0.0025	solute carrier family 16, member 3 (monocarboxylic acid transporter 4)							SLC16A3	1.0789
40	ARPC1B	10095	1.0786	0.0107	actin related protein 2/3 complex, subunit 1B, 41kDa							ARPC1B	1.0786
41	PXN	5829	1.0762	0.0015	paxillin							PXN	1.0762
42	MYO1C	4641	1.0743	0.0045	myosin IC							MYO1C	1.0743
43	CDKN1A	1026	1.0685	0.0045	cyclin-dependent kinase inhibitor 1A (p21, Cip1)							CDKN1A	1.0685
44	LMNA	4000	1.0677	0.0097	lamin A/C							LMNA	1.0677
45	LRP10	26020	1.0605	0.0266	low density lipoprotein receptor-related protein 10							LRP10	1.0605
46	PDLIM1	9124	1.0598	0.0002	PDZ and LIM domain 1							PDLIM1	1.0598
47	SYDE1	85360	1.0516	0.0324	synapse defective 1, Rho GTPase, homolog 1 (C. elegans)							SYDE1	1.0516
48	PLAT	5327	1.048	0.0002	plasminogen activator, tissue							PLAT	1.048
49	RUNX1	861	1.0412	0.0025	runt-related transcription factor 1							RUNX1	1.0412
50	VWF	7450	1.0401	0.0025	von Willebrand factor							VWF	1.0401
51	ACVRL1	94	1.0398	0.0049	activin A receptor type II-like 1							ACVRL1	1.0398
52	PECAM1	5175	1.0372	0.0035	platelet/endothelial cell adhesion molecule 1							PECAM1	1.0372
53	IFI30	10437	1.0307	0.0094	interferon, gamma-inducible protein 30							IFI30	1.0307
54	CLDN5	7122	1.0211	0.0036	claudin 5							CLDN5	1.0211
55	PTRF	284119	1.0197	0.0162	polymerase I and transcript release factor							PTRF	1.0197
56	TUBB6	84617	1.0187	0.0039	tubulin, beta 6 class V							TUBB6	1.0187
57	BCL3	602	1.018	0.0052	B-cell CLL/lymphoma 3							BCL3	1.018
58	DOCK6	57572	1.0141	0.0034	dedicator of cytokinesis 6							DOCK6	1.0141
59	PLAUR	5329	1.0131	0.0163	plasminogen activator, urokinase receptor							PLAUR	1.0131
60	CEBPD	1052	1.0113	0.0015	CCAAT/enhancer binding protein (C/EBP), delta							CEBPD	1.0113
61	PML	5371	1.0069	0.0162	promyelocytic leukemia							PML	1.0069
62	PAPSS2	9060	1.0037	0.0002	3'-phosphoadenosine 5'-phosphosulfate synthase 2							PAPSS2	1.0037
63	ARID5A	10865	1.0028	0.0029	AT rich interactive domain 5A (MRF1-like)							ARID5A	1.0028
64	TNS1	7145	1.0001	0.0078	tensin 1							TNS1	1.0001
65	SBNO2	22904	0.9969	0.0166	strawberry notch homolog 2 (Drosophila)							SBNO2	0.9969
66	STARD8	9754	0.9909	0.0007	StAR-related lipid transfer (START) domain containing 8							STARD8	0.9909
67	SLC1A5	6510	0.9907	0.0015	solute carrier family 1 (neutral amino acid transporter), member 5							SLC1A5	0.9907
68	AXL	558	0.9874	0.0074	AXL receptor tyrosine kinase							AXL	0.9874
69	SHC1	6464	0.9865	0.004	SHC (Src homology 2 domain containing) transforming protein 1							SHC1	0.9865
70	FBLN1	2192	0.9846	0.0128	fibulin 1							FBLN1	0.9846
71	ANGPTL4	51129	0.9825	0.0023	angiopoietin-like 4							ANGPTL4	0.9825
72	PPP1R18	170954	0.9821	0.0134	protein phosphatase 1, regulatory subunit 18							PPP1R18	0.9821
73	GPR4	2828	0.9818	0.0105	G protein-coupled receptor 4							GPR4	0.9818
74	ICAM1	3383	0.9814	0.0133	intercellular adhesion molecule 1							ICAM1	0.9814
75	GGT5	2687	0.977	0.0052	gamma-glutamyltransferase 5							GGT5	0.977
76	C1R	715	0.9769	0.0096	complement component 1, r subcomponent							C1R	0.9769
77	ITGB4	3691	0.9761	0.0107	integrin, beta 4							ITGB4	0.9761
78	ITPR3	3710	0.9734	0.0017	inositol 1,4,5-trisphosphate receptor, type 3							ITPR3	0.9734
79	MOV10	4343	0.971	0.0032	Mov10, Moloney leukemia virus 10, homolog (mouse)							MOV10	0.971
80	OSMR	9180	0.9707	0.0055	oncostatin M receptor							OSMR	0.9707
81	FOSL2	2355	0.9705	0.0128	FOS-like antigen 2							FOSL2	0.9705
82	SLC2A1	6513	0.9697	0.0018	solute carrier family 2 (facilitated glucose transporter), member 1							SLC2A1	0.9697
83	TCN2	6948	0.969	0.0008	transcobalamin II							TCN2	0.969
84	RBPMS	11030	0.9622	0.0006	RNA binding protein with multiple splicing							RBPMS	0.9622
85	ANXA2	302	0.9604	0.0067	annexin A2							ANXA2	0.9604
86	SLC52A3	113278	0.9592	0.0022	solute carrier family 52, riboflavin transporter, member 3							SLC52A3	0.9592
87	RAC2	5880	0.9572	0.0117	ras-related C3 botulinum toxin substrate 2 (rho family, small GTP binding protein Rac2)							RAC2	0.9572
88	VAMP5	10791	0.9566	0.0047	vesicle-associated membrane protein 5 (myobrevin)							VAMP5	0.9566
89	CASP4	837	0.9559	0.0104	caspase 4, apoptosis-related cysteine peptidase							CASP4	0.9559
90	NFKB2	4791	0.9545	0.0145	nuclear factor of kappa light polypeptide gene enhancer in B-cells 2 (p49/p100)							NFKB2	0.9545
91	ESAM	90952	0.9536	0.0013	endothelial cell adhesion molecule							ESAM	0.9536
92	GNG11	2791	0.9534	0.004	guanine nucleotide binding protein (G protein), gamma 11							GNG11	0.9534
93	ITPRIP	85450	0.9499	0.0072	inositol 1,4,5-trisphosphate receptor interacting protein							ITPRIP	0.9499
94	CTDSP1	58190	0.949	0.0126	CTD (carboxy-terminal domain, RNA polymerase II, polypeptide A) small phosphatase 1							CTDSP1	0.949
95	TENC1	23371	0.9476	0.0188	tensin like C1 domain containing phosphatase (tensin 2)							TENC1	0.9476
96	STAT3	6774	0.9471	0.0113	signal transducer and activator of transcription 3 (acute-phase response factor)							STAT3	0.9471
97	TIMP3	7078	0.9453	0.007	TIMP metallopeptidase inhibitor 3							TIMP3	0.9453
98	SPSB1	80176	0.9416	0.0023	splA/ryanodine receptor domain and SOCS box containing 1							SPSB1	0.9416
99	IGFBP4	3487	0.9391	0.0042	insulin-like growth factor binding protein 4							IGFBP4	0.9391
100	MOB3A	126308	0.9383	0.0083	MOB kinase activator 3A							MOB3A	0.9383
101	SEMA3F	6405	0.9374	0.0027	sema domain, immunoglobulin domain (Ig), short basic domain, secreted, (semaphorin) 3F							SEMA3F	0.9374
102	SERPINA1	5265	0.937	0.0038	serpin peptidase inhibitor, clade A (alpha-1 antiproteinase, antitrypsin), member 1							SERPINA1	0.937
103	MSN	4478	0.9368	0.018	moesin							MSN	0.9368
104	SORBS3	10174	0.936	0.0212	sorbin and SH3 domain containing 3							SORBS3	0.936
105	ADAM15	8751	0.9359	0.0122	ADAM metallopeptidase domain 15							ADAM15	0.9359
106	EMP3	2014	0.9343	0.0178	epithelial membrane protein 3							EMP3	0.9343
107	CYBA	1535	0.9332	0.0093	cytochrome b-245, alpha polypeptide							CYBA	0.9332
108	FN1	2335	0.9306	0.01	fibronectin 1							FN1	0.9306
109	SMTN	6525	0.9267	0.0044	smoothelin							SMTN	0.9267
110	PNPLA2	57104	0.9264	0.06	patatin-like phospholipase domain containing 2							PNPLA2	0.9264
111	GYPC	2995	0.9205	0.0022	glycophorin C (Gerbich blood group)							GYPC	0.9205
112	TAGLN	6876	0.9179	0.0084	transgelin							TAGLN	0.9179
113	C10ORF54	64115	0.9151	0.0197	chromosome 10 open reading frame 54							C10ORF54	0.9151
114	SMOX	54498	0.9147	0.006	spermine oxidase							SMOX	0.9147
115	SERPING1	710	0.9142	0.0081	serpin peptidase inhibitor, clade G (C1 inhibitor), member 1							SERPING1	0.9142
116	SQRDL	58472	0.9129	0.0146	sulfide quinone reductase-like (yeast)							SQRDL	0.9129
117	RHBDF2	79651	0.9119	0.0047	rhomboid 5 homolog 2 (Drosophila)							RHBDF2	0.9119
118	SP100	6672	0.9112	0.0091	SP100 nuclear antigen							SP100	0.9112
119	TCIRG1	10312	0.9106	0.0257	T-cell, immune regulator 1, ATPase, H+ transporting, lysosomal V0 subunit A3							TCIRG1	0.9106
120	RELA	5970	0.9102	0.0178	v-rel reticuloendotheliosis viral oncogene homolog A (avian)							RELA	0.9102
121	DRAM1	55332	0.9088	0.0106	DNA-damage regulated autophagy modulator 1							DRAM1	0.9088
122	MT1X	4501	0.9087	0.0007	metallothionein 1X							MT1X	0.9087
123	SZRD1	26099	0.9084	0.0134	SUZ RNA binding domain containing 1							SZRD1	0.9084
124	MGAT1	4245	0.908	0.0185	mannosyl (alpha-1,3-)-glycoprotein beta-1,2-N-acetylglucosaminyltransferase							MGAT1	0.908
125	PLEKHO2	80301	0.9072	0.0231	pleckstrin homology domain containing, family O member 2							PLEKHO2	0.9072
126	SERPINE1	5054	0.9071	0.0153	serpin peptidase inhibitor, clade E (nexin, plasminogen activator inhibitor type 1), member 1							SERPINE1	0.9071
127	TAP1	6890	0.9069	0.017	transporter 1, ATP-binding cassette, sub-family B (MDR/TAP)							TAP1	0.9069
128	IRF1	3659	0.9054	0.015	interferon regulatory factor 1							IRF1	0.9054
129	TBX2	6909	0.905	0.0125	T-box 2							TBX2	0.905
130	SMAD6	4091	0.9039	0.0016	SMAD family member 6							SMAD6	0.9039
131	RBMS2	5939	0.9037	0.0046	RNA binding motif, single stranded interacting protein 2							RBMS2	0.9037
132	TLN1	7094	0.9035	0.0221	talin 1							TLN1	0.9035
133	AHNAK	79026	0.9009	0.0075	AHNAK nucleoprotein							AHNAK	0.9009
134	F11R	50848	0.8987	0.0026	F11 receptor							F11R	0.8987
135	FCGRT	2217	0.8969	0.0198	Fc fragment of IgG, receptor, transporter, alpha							FCGRT	0.8969
136	AGPAT2	10555	0.8964	0.0197	1-acylglycerol-3-phosphate O-acyltransferase 2 (lysophosphatidic acid acyltransferase, beta)							AGPAT2	0.8964
137	B4GALT1	2683	0.8962	0.0034	UDP-Gal:betaGlcNAc beta 1,4- galactosyltransferase, polypeptide 1							B4GALT1	0.8962
138	PDGFRB	5159	0.8953	0.0164	platelet-derived growth factor receptor, beta polypeptide							PDGFRB	0.8953
139	CDK2	1017	0.8936	0.0049	cyclin-dependent kinase 2							CDK2	0.8936
140	FGR	2268	0.8926	0.017	Gardner-Rasheed feline sarcoma viral (v-fgr) oncogene homolog							FGR	0.8926
141	ISG20	3669	0.8925	0.008	interferon stimulated exonuclease gene 20kDa							ISG20	0.8925
142	PLP2	5355	0.8911	0.0024	proteolipid protein 2 (colonic epithelium-enriched)							PLP2	0.8911
143	IL17RA	23765	0.8895	0.0072	interleukin 17 receptor A							IL17RA	0.8895
144	BMP1	649	0.8889	0.0468	bone morphogenetic protein 1							BMP1	0.8889
145	FGFRL1	53834	0.8879	0.0023	fibroblast growth factor receptor-like 1							FGFRL1	0.8879
146	PLCD1	5333	0.8844	0.0171	phospholipase C, delta 1							PLCD1	0.8844
147	IL1R1	3554	0.8828	0.0063	interleukin 1 receptor, type I							IL1R1	0.8828
148	TNFRSF10B	8795	0.8808	0.0025	tumor necrosis factor receptor superfamily, member 10b							TNFRSF10B	0.8808
149	DPP9	91039	0.8805	0.0177	dipeptidyl-peptidase 9							DPP9	0.8805
150	S1PR3	1903	0.8796	0.0005	sphingosine-1-phosphate receptor 3							S1PR3	0.8796
151	ZFP36	7538	0.8783	0.0199	zinc finger protein 36, C3H type, homolog (mouse)							ZFP36	0.8783
152	PLOD1	5351	0.8742	0.0197	procollagen-lysine, 2-oxoglutarate 5-dioxygenase 1							PLOD1	0.8742
153	STC1	6781	0.8732	0.0009	stanniocalcin 1							STC1	0.8732
154	SLC24A6	80024	0.873	0.0094	solute carrier family 24 (sodium/lithium/calcium exchanger), member 6							SLC24A6	0.873
155	TMBIM1	64114	0.8728	0.0182	transmembrane BAX inhibitor motif containing 1							TMBIM1	0.8728
156	S100A16	140576	0.8696	0.0064	S100 calcium binding protein A16							S100A16	0.8696
157	MMP14	4323	0.8689	0.0375	matrix metallopeptidase 14 (membrane-inserted)							MMP14	0.8689
158	FSTL3	10272	0.8687	0.0154	follistatin-like 3 (secreted glycoprotein)							FSTL3	0.8687
159	TRIOBP	11078	0.8686	0.0045	TRIO and F-actin binding protein							TRIOBP	0.8686
160	PVRL2	5819	0.8683	0.0126	poliovirus receptor-related 2 (herpesvirus entry mediator B)							PVRL2	0.8683
161	SERPINA3	12	0.8668	0.0016	serpin peptidase inhibitor, clade A (alpha-1 antiproteinase, antitrypsin), member 3							SERPINA3	0.8668
162	HDAC7	51564	0.8662	0.0164	histone deacetylase 7							HDAC7	0.8662
163	SNX33	257364	0.8643	0.0104	sorting nexin 33							SNX33	0.8643
164	TNFRSF12A	51330	0.8643	0.0207	tumor necrosis factor receptor superfamily, member 12A							TNFRSF12A	0.8643
165	LILRB3	11025	0.864	0.0641	leukocyte immunoglobulin-like receptor, subfamily B (with TM and ITIM domains), member 3							LILRB3	0.864
166	TNFRSF1B	7133	0.864	0.0144	tumor necrosis factor receptor superfamily, member 1B							TNFRSF1B	0.864
167	RXRA	6256	0.8632	0.0064	retinoid X receptor, alpha							RXRA	0.8632
168	IL13RA1	3597	0.8605	0.0183	interleukin 13 receptor, alpha 1							IL13RA1	0.8605
169	TRIP10	9322	0.8599	0.0066	thyroid hormone receptor interactor 10							TRIP10	0.8599
170	C1QTNF1	114897	0.8598	0.0148	C1q and tumor necrosis factor related protein 1							C1QTNF1	0.8598
171	SEPN1	57190	0.8569	0.0154	selenoprotein N, 1							SEPN1	0.8569
172	TEAD4	7004	0.8562	0.0058	TEA domain family member 4							TEAD4	0.8562
173	RRBP1	6238	0.855	0.0145	ribosome binding protein 1 homolog 180kDa (dog)							RRBP1	0.855
174	MAPKAPK3	7867	0.8548	0.0074	mitogen-activated protein kinase-activated protein kinase 3							MAPKAPK3	0.8548
175	TPM2	7169	0.8541	0.0085	tropomyosin 2 (beta)							TPM2	0.8541
176	IL17RC	84818	0.8524	0.02	interleukin 17 receptor C							IL17RC	0.8524
177	MYL9	10398	0.8523	0.0162	myosin, light chain 9, regulatory							MYL9	0.8523
178	SLCO2B1	11309	0.8514	0.0125	solute carrier organic anion transporter family, member 2B1							SLCO2B1	0.8514
179	MVP	9961	0.8513	0.0436	major vault protein							MVP	0.8513
180	C1ORF64	149563	0.8489	0.002	chromosome 1 open reading frame 64							C1ORF64	0.8489
181	CALD1	800	0.8487	0.0248	caldesmon 1							CALD1	0.8487
182	TMEM179B	374395	0.8477	0.017	transmembrane protein 179B							TMEM179B	0.8477
183	DHRS3	9249	0.847	0.0019	dehydrogenase/reductase (SDR family) member 3							DHRS3	0.847
184	PIEZO1	9780	0.8464	0.0162	piezo-type mechanosensitive ion channel component 1							PIEZO1	0.8464
185	BST2	684	0.8455	0.0079	bone marrow stromal cell antigen 2							BST2	0.8455
186	IL15RA	3601	0.8452	0.0085	interleukin 15 receptor, alpha							IL15RA	0.8452
187	SLC7A5	8140	0.845	0.005	solute carrier family 7 (amino acid transporter light chain, L system), member 5							SLC7A5	0.845
188	GLT25D1	79709	0.8435	0.0192	glycosyltransferase 25 domain containing 1							GLT25D1	0.8435
189	HYAL2	8692	0.8429	0.0056	hyaluronoglucosaminidase 2							HYAL2	0.8429
190	MT1E	4493	0.8428	0.0013	metallothionein 1E							MT1E	0.8428
191	TGFBR2	7048	0.8415	0.0184	transforming growth factor, beta receptor II (70/80kDa)							TGFBR2	0.8415
192	NFKBIA	4792	0.8408	0.0081	nuclear factor of kappa light polypeptide gene enhancer in B-cells inhibitor, alpha							NFKBIA	0.8408
193	LAMA5	3911	0.8404	0.0049	laminin, alpha 5							LAMA5	0.8404
194	SP110	3431	0.8401	0.0197	SP110 nuclear body protein							SP110	0.8401
195	GRN	2896	0.8394	0.0575	granulin							GRN	0.8394
196	GPSM3	63940	0.8389	0.0466	G-protein signaling modulator 3							GPSM3	0.8389
197	THBS1	7057	0.8371	0.014	thrombospondin 1							THBS1	0.8371
198	VASN	114990	0.8367	0.0068	vasorin							VASN	0.8367
199	SECTM1	6398	0.8366	0.0062	secreted and transmembrane 1							SECTM1	0.8366
200	TAPBP	6892	0.8357	0.0314	TAP binding protein (tapasin)							TAPBP	0.8357
201	CD93	22918	0.8355	0.0127	CD93 molecule							CD93	0.8355
202	CP	1356	0.8344	0.0015	ceruloplasmin (ferroxidase)							CP	0.8344
203	PODXL	5420	0.8343	0.0007	podocalyxin-like							PODXL	0.8343
204	IGFBP7	3490	0.8341	0.0203	insulin-like growth factor binding protein 7							IGFBP7	0.8341
205	APOL6	80830	0.8337	0.0151	apolipoprotein L, 6							APOL6	0.8337
206	RIN3	79890	0.8335	0.0224	Ras and Rab interactor 3							RIN3	0.8335
207	SRGN	5552	0.8332	0.0235	serglycin							SRGN	0.8332
208	ITGB3	3690	0.831	0.0089	integrin, beta 3 (platelet glycoprotein IIIa, antigen CD61)							ITGB3	0.831
209	EDN1	1906	0.8301	0.0026	endothelin 1							EDN1	0.8301
210	MT1G	4495	0.8284	0.0016	metallothionein 1G							MT1G	0.8284
211	TYMP	1890	0.8272	0.0322	thymidine phosphorylase							TYMP	0.8272
212	TGFB1I1	7041	0.8254	0.0262	transforming growth factor beta 1 induced transcript 1							TGFB1I1	0.8254
213	CHST3	9469	0.8251	0.0143	carbohydrate (chondroitin 6) sulfotransferase 3							CHST3	0.8251
214	ITPRIPL2	162073	0.8248	0.0062	inositol 1,4,5-trisphosphate receptor interacting protein-like 2							ITPRIPL2	0.8248
215	MUC1	4582	0.8238	0.0073	mucin 1, cell surface associated							MUC1	0.8238
216	WWTR1	25937	0.8236	0.0041	WW domain containing transcription regulator 1							WWTR1	0.8236
217	LPP	4026	0.8223	0.0135	LIM domain containing preferred translocation partner in lipoma							LPP	0.8223
218	VASP	7408	0.8221	0.0119	vasodilator-stimulated phosphoprotein							VASP	0.8221
219	IER3	8870	0.8216	0.0095	immediate early response 3							IER3	0.8216
220	OGFR	11054	0.8213	0.0609	opioid growth factor receptor							OGFR	0.8213
221	SERPINH1	871	0.8212	0.0153	serpin peptidase inhibitor, clade H (heat shock protein 47), member 1, (collagen binding protein 1)							SERPINH1	0.8212
222	ABCD1	215	0.8207	0.0247	ATP-binding cassette, sub-family D (ALD), member 1							ABCD1	0.8207
223	HSPG2	3339	0.8204	0.0332	heparan sulfate proteoglycan 2							HSPG2	0.8204
224	COL4A2	1284	0.8186	0.023	collagen, type IV, alpha 2							COL4A2	0.8186
225	HLA-B	3106	0.8179	0.0408	major histocompatibility complex, class I, B							HLA-B	0.8179
226	ANXA2P2	304	0.8169	0.0144	annexin A2 pseudogene 2							ANXA2P2	0.8169
227	CYB5R3	1727	0.8168	0.0273	cytochrome b5 reductase 3							CYB5R3	0.8168
228	S100A8	6279	0.8165	0.0049	S100 calcium binding protein A8							S100A8	0.8165
229	TGFB1	7040	0.816	0.0305	transforming growth factor, beta 1							TGFB1	0.816
230	A4GALT	53947	0.814	0.0237	alpha 1,4-galactosyltransferase							A4GALT	0.814
231	MAP3K6	9064	0.8124	0.0093	mitogen-activated protein kinase kinase kinase 6							MAP3K6	0.8124
232	RBCK1	10616	0.8121	0.0296	RanBP-type and C3HC4-type zinc finger containing 1							RBCK1	0.8121
233	CD44	960	0.8119	0.013	CD44 molecule (Indian blood group)							CD44	0.8119
234	CFI	3426	0.8114	0.005	complement factor I							CFI	0.8114
235	GSDMD	79792	0.8109	0.0159	gasdermin D							GSDMD	0.8109
236	NME4	4833	0.8109	0.0113	NME/NM23 nucleoside diphosphate kinase 4							NME4	0.8109
237	TES	26136	0.8109	0.0017	testis derived transcript (3 LIM domains)							TES	0.8109
238	SHARPIN	81858	0.8097	0.0287	SHANK-associated RH domain interactor							SHARPIN	0.8097
239	MYD88	4615	0.8092	0.021	myeloid differentiation primary response gene (88)							MYD88	0.8092
240	IFI35	3430	0.8087	0.0295	interferon-induced protein 35							IFI35	0.8087
241	NES	10763	0.8082	0.0071	nestin							NES	0.8082
242	RHOD	29984	0.8067	0.0213	ras homolog family member D							RHOD	0.8067
243	EPHB4	2050	0.8061	0.0161	EPH receptor B4							EPHB4	0.8061
244	HLA-C	3107	0.806	0.0353	major histocompatibility complex, class I, C							HLA-C	0.806
245	SLC3A2	6520	0.8056	0.0109	solute carrier family 3 (activators of dibasic and neutral amino acid transport), member 2							SLC3A2	0.8056
246	MPZL2	10205	0.8056	0.0066	myelin protein zero-like 2							MPZL2	0.8056
247	LGALS3	3958	0.8048	0.0106	lectin, galactoside-binding, soluble, 3							LGALS3	0.8048
248	TNFRSF10D	8793	0.8044	0.0023	tumor necrosis factor receptor superfamily, member 10d, decoy with truncated death domain							TNFRSF10D	0.8044
249	CD151	977	0.804	0.0336	CD151 molecule (Raph blood group)							CD151	0.804
250	PRKCH	5583	0.8036	0.0041	protein kinase C, eta							PRKCH	0.8036
251	TRIM25	7706	0.8035	0.0056	tripartite motif containing 25							TRIM25	0.8035
252	PSMB8	5696	0.8029	0.0288	proteasome (prosome, macropain) subunit, beta type, 8 (large multifunctional peptidase 7)							PSMB8	0.8029
253	FSTL1	11167	0.8029	0.0302	follistatin-like 1							FSTL1	0.8029
254	DDR2	4921	0.8024	0.0172	discoidin domain receptor tyrosine kinase 2							DDR2	0.8024
255	EFEMP2	30008	0.7999	0.0474	EGF containing fibulin-like extracellular matrix protein 2							EFEMP2	0.7999
256	SPHK1	8877	0.7991	0.022	sphingosine kinase 1							SPHK1	0.7991
257	TRIM38	10475	0.798	0.028	tripartite motif containing 38							TRIM38	0.798
258	MXRA8	54587	0.7978	0.0368	matrix-remodelling associated 8							MXRA8	0.7978
259	LAMB2	3913	0.7973	0.0452	laminin, beta 2 (laminin S)							LAMB2	0.7973
260	EML3	256364	0.7971	0.0388	echinoderm microtubule associated protein like 3							EML3	0.7971
261	COL6A2	1292	0.7963	0.0362	collagen, type VI, alpha 2							COL6A2	0.7963
262	PLIN2	123	0.7962	0.0016	perilipin 2							PLIN2	0.7962
263	TMEM204	79652	0.7956	0.0065	transmembrane protein 204							TMEM204	0.7956
264	FTL	2512	0.795	0.0151	ferritin, light polypeptide							FTL	0.795
265	GADD45B	4616	0.794	0.0138	growth arrest and DNA-damage-inducible, beta							GADD45B	0.794
266	CDH5	1003	0.794	0.0076	cadherin 5, type 2 (vascular endothelium)							CDH5	0.794
267	PTBP1	5725	0.7939	0.0594	polypyrimidine tract binding protein 1							PTBP1	0.7939
268	MR1	3140	0.7931	0.0172	major histocompatibility complex, class I-related							MR1	0.7931
269	MT1M	4499	0.7929	0.0005	metallothionein 1M							MT1M	0.7929
270	POLD4	57804	0.7928	0.0442	polymerase (DNA-directed), delta 4, accessory subunit							POLD4	0.7928
271	OAF	220323	0.7925	0.0143	OAF homolog (Drosophila)							OAF	0.7925
272	FERMT3	83706	0.7921	0.0174	fermitin family member 3							FERMT3	0.7921
273	S100A9	6280	0.7909	0.0094	S100 calcium binding protein A9							S100A9	0.7909
274	TBX3	6926	0.7889	0.0014	T-box 3							TBX3	0.7889
275	CEBPB	1051	0.7887	0.017	CCAAT/enhancer binding protein (C/EBP), beta							CEBPB	0.7887
276	PHF19	26147	0.7886	0.0215	PHD finger protein 19							PHF19	0.7886
277	SLC15A3	51296	0.7881	0.0314	solute carrier family 15, member 3							SLC15A3	0.7881
278	SLC39A1	27173	0.7873	0.0046	solute carrier family 39 (zinc transporter), member 1							SLC39A1	0.7873
279	WASF2	10163	0.7862	0.0202	WAS protein family, member 2							WASF2	0.7862
280	ETS1	2113	0.786	0.0113	v-ets erythroblastosis virus E26 oncogene homolog 1 (avian)							ETS1	0.786
281	TRAM2	9697	0.785	0.0075	translocation associated membrane protein 2							TRAM2	0.785
282	FOXC1	2296	0.7847	0.002	forkhead box C1							FOXC1	0.7847
283	NFKBIZ	64332	0.7839	0.0142	nuclear factor of kappa light polypeptide gene enhancer in B-cells inhibitor, zeta							NFKBIZ	0.7839
284	ABHD4	63874	0.7836	0.0224	abhydrolase domain containing 4							ABHD4	0.7836
285	PXDC1	221749	0.7823	0.0162	PX domain containing 1							PXDC1	0.7823
286	ASCC2	84164	0.7811	0.0208	activating signal cointegrator 1 complex subunit 2							ASCC2	0.7811
287	SCAMP2	10066	0.781	0.0255	secretory carrier membrane protein 2							SCAMP2	0.781
288	LCP1	3936	0.7802	0.0193	lymphocyte cytosolic protein 1 (L-plastin)							LCP1	0.7802
289	IFI16	3428	0.78	0.0326	interferon, gamma-inducible protein 16							IFI16	0.78
290	GMPR	2766	0.7798	0.0007	guanosine monophosphate reductase							GMPR	0.7798
291	ADCY4	196883	0.7796	0.026	adenylate cyclase 4							ADCY4	0.7796
292	ARAP1	116985	0.7793	0.0505	ArfGAP with RhoGAP domain, ankyrin repeat and PH domain 1							ARAP1	0.7793
293	PAK4	10298	0.7793	0.0489	p21 protein (Cdc42/Rac)-activated kinase 4							PAK4	0.7793
294	RCN3	57333	0.7791	0.0265	reticulocalbin 3, EF-hand calcium binding domain							RCN3	0.7791
295	RNPEPL1	57140	0.7772	0.0718	arginyl aminopeptidase (aminopeptidase B)-like 1							RNPEPL1	0.7772
296	ABCC3	8714	0.7771	0.0075	ATP-binding cassette, sub-family C (CFTR/MRP), member 3							ABCC3	0.7771
297	MYO9B	4650	0.776	0.0601	myosin IXB							MYO9B	0.776
298	HLA-A	3105	0.7755	0.0321	major histocompatibility complex, class I, A							HLA-A	0.7755
299	PNP	4860	0.7708	0.0113	purine nucleoside phosphorylase							PNP	0.7708
300	PLEC	5339	0.7706	0.0368	plectin							PLEC	0.7706
301	EMP2	2013	0.7701	0.0025	epithelial membrane protein 2							EMP2	0.7701
302	PODN	127435	0.7699	0.0249	podocan							PODN	0.7699
303	SVIL	6840	0.7697	0.007	supervillin							SVIL	0.7697
304	HLA-F	3134	0.7697	0.0389	major histocompatibility complex, class I, F							HLA-F	0.7697
305	SAMD4B	55095	0.7693	0.043	sterile alpha motif domain containing 4B							SAMD4B	0.7693
306	RNF213	57674	0.7691	0.0211	ring finger protein 213							RNF213	0.7691
307	C1QC	714	0.7689	0.0133	complement component 1, q subcomponent, C chain							C1QC	0.7689
308	RHOG	391	0.7687	0.063	ras homolog family member G							RHOG	0.7687
309	TOR4A	54863	0.7686	0.0036	torsin family 4, member A							TOR4A	0.7686
310	EHD4	30844	0.7673	0.0098	EH-domain containing 4							EHD4	0.7673
311	STOM	2040	0.7665	0.0124	stomatin							STOM	0.7665
312	ELF4	2000	0.7659	0.0171	E74-like factor 4 (ets domain transcription factor)							ELF4	0.7659
313	SIPA1	6494	0.7657	0.0337	signal-induced proliferation-associated 1							SIPA1	0.7657
314	GATA2	2624	0.7655	0.001	GATA binding protein 2							GATA2	0.7655
315	COL6A1	1291	0.7652	0.051	collagen, type VI, alpha 1							COL6A1	0.7652
316	NOS3	4846	0.7651	0.0016	nitric oxide synthase 3 (endothelial cell)							NOS3	0.7651
317	APOBEC3C	27350	0.7649	0.0056	apolipoprotein B mRNA editing enzyme, catalytic polypeptide-like 3C							APOBEC3C	0.7649
318	MECOM	2122	0.7648	0.0018	MDS1 and EVI1 complex locus							MECOM	0.7648
319	TGFBI	7045	0.7629	0.0193	transforming growth factor, beta-induced, 68kDa							TGFBI	0.7629
320	YAP1	10413	0.7619	0.0078	Yes-associated protein 1							YAP1	0.7619
321	STAT6	6778	0.7618	0.0222	signal transducer and activator of transcription 6, interleukin-4 induced							STAT6	0.7618
322	APOL3	80833	0.7618	0.0233	apolipoprotein L, 3							APOL3	0.7618
323	MFAP4	4239	0.7613	0.0227	microfibrillar-associated protein 4							MFAP4	0.7613
324	RAB3IL1	5866	0.7607	0.079	RAB3A interacting protein (rabin3)-like 1							RAB3IL1	0.7607
325	FAM176B	55194	0.7599	0.0357	family with sequence similarity 176, member B							FAM176B	0.7599
326	IFI27	3429	0.7599	0.0105	interferon, alpha-inducible protein 27							IFI27	0.7599
327	PRELP	5549	0.7596	0.0582	proline/arginine-rich end leucine-rich repeat protein							PRELP	0.7596
328	ADAMTS1	9510	0.7594	0.0059	ADAM metallopeptidase with thrombospondin type 1 motif, 1							ADAMTS1	0.7594
329	PLEKHF1	79156	0.7588	0.0046	pleckstrin homology domain containing, family F (with FYVE domain) member 1							PLEKHF1	0.7588
330	BCL7C	9274	0.7586	0.0327	B-cell CLL/lymphoma 7C							BCL7C	0.7586
331	GNAI2	2771	0.7585	0.0641	guanine nucleotide binding protein (G protein), alpha inhibiting activity polypeptide 2							GNAI2	0.7585
332	SLFN11	91607	0.7583	0.0079	schlafen family member 11							SLFN11	0.7583
333	ACADS	35	0.758	0.0337	acyl-CoA dehydrogenase, C-2 to C-3 short chain							ACADS	0.758
334	CMTM3	123920	0.7572	0.0179	CKLF-like MARVEL transmembrane domain containing 3							CMTM3	0.7572
335	HSPB7	27129	0.7563	0.0192	heat shock 27kDa protein family, member 7 (cardiovascular)							HSPB7	0.7563
336	PARVB	29780	0.7558	0.0046	parvin, beta							PARVB	0.7558
337	SLC11A1	6556	0.7554	0.0587	solute carrier family 11 (proton-coupled divalent metal ion transporters), member 1							SLC11A1	0.7554
338	RAB34	83871	0.7544	0.0078	RAB34, member RAS oncogene family							RAB34	0.7544
339	PARP14	54625	0.7544	0.0338	poly (ADP-ribose) polymerase family, member 14							PARP14	0.7544
340	CCL2	6347	0.7539	0.015	chemokine (C-C motif) ligand 2							CCL2	0.7539
341	COPZ2	51226	0.7532	0.0295	coatomer protein complex, subunit zeta 2							COPZ2	0.7532
342	CORO1B	57175	0.7528	0.0592	coronin, actin binding protein, 1B							CORO1B	0.7528
343	ARAF	369	0.7524	0.0282	v-raf murine sarcoma 3611 viral oncogene homolog							ARAF	0.7524
344	PGF	5228	0.752	0.0031	placental growth factor							PGF	0.752
345	TRAF3IP2	10758	0.7511	0.0013	TRAF3 interacting protein 2							TRAF3IP2	0.7511
346	CRISPLD2	83716	0.7495	0.0208	cysteine-rich secretory protein LCCL domain containing 2							CRISPLD2	0.7495
347	CD68	968	0.7492	0.024	CD68 molecule							CD68	0.7492
348	S100A10	6281	0.7488	0.0165	S100 calcium binding protein A10							S100A10	0.7488
349	ZYX	7791	0.7486	0.0698	zyxin							ZYX	0.7486
350	STAB1	23166	0.7481	0.0398	stabilin 1							STAB1	0.7481
351	RARG	5916	0.748	0.0819	retinoic acid receptor, gamma							RARG	0.748
352	SERTAD1	29950	0.7462	0.0221	SERTA domain containing 1							SERTAD1	0.7462
353	SLC25A37	51312	0.7459	0.0014	solute carrier family 25 (mitochondrial iron transporter), member 37							SLC25A37	0.7459
354	ACTG2	72	0.7457	0.005	actin, gamma 2, smooth muscle, enteric							ACTG2	0.7457
355	CXCL1	2919	0.7447	0.0083	chemokine (C-X-C motif) ligand 1 (melanoma growth stimulating activity, alpha)							CXCL1	0.7447
356	MMP19	4327	0.7432	0.0775	matrix metallopeptidase 19							MMP19	0.7432
357	IL6R	3570	0.7427	0.0037	interleukin 6 receptor							IL6R	0.7427
358	MAN2B1	4125	0.7426	0.0587	mannosidase, alpha, class 2B, member 1							MAN2B1	0.7426
359	MAVS	57506	0.7422	0.0085	mitochondrial antiviral signaling protein							MAVS	0.7422
360	IL18BP	10068	0.7422	0.014	interleukin 18 binding protein							IL18BP	0.7422
361	PLIN3	10226	0.742	0.031	perilipin 3							PLIN3	0.742
362	FES	2242	0.7414	0.0144	feline sarcoma oncogene							FES	0.7414
363	PSMB9	5698	0.7409	0.0364	proteasome (prosome, macropain) subunit, beta type, 9 (large multifunctional peptidase 2)							PSMB9	0.7409
364	DAP	1611	0.7401	0.0196	death-associated protein							DAP	0.7401
365	HMG20B	10362	0.7391	0.0348	high mobility group 20B							HMG20B	0.7391
366	CSF1	1435	0.7385	0.0733	colony stimulating factor 1 (macrophage)							CSF1	0.7385
367	LOXL2	4017	0.7383	0.0247	lysyl oxidase-like 2							LOXL2	0.7383
368	PLOD3	8985	0.7381	0.038	procollagen-lysine, 2-oxoglutarate 5-dioxygenase 3							PLOD3	0.7381
369	TTC7A	57217	0.738	0.0061	tetratricopeptide repeat domain 7A							TTC7A	0.738
370	OAS3	4940	0.7378	0.0149	2'-5'-oligoadenylate synthetase 3, 100kDa							OAS3	0.7378
371	EGFL7	51162	0.7371	0.0338	EGF-like-domain, multiple 7							EGFL7	0.7371
372	GPR108	56927	0.7365	0.0508	G protein-coupled receptor 108							GPR108	0.7365
373	C1S	716	0.7362	0.0311	complement component 1, s subcomponent							C1S	0.7362
374	RHBDF1	64285	0.7361	0.0242	rhomboid 5 homolog 1 (Drosophila)							RHBDF1	0.7361
375	PLAU	5328	0.7336	0.0198	plasminogen activator, urokinase							PLAU	0.7336
376	SDC4	6385	0.7329	0.0107	syndecan 4							SDC4	0.7329
377	TNFAIP3	7128	0.7326	0.0312	tumor necrosis factor, alpha-induced protein 3							TNFAIP3	0.7326
378	SLC2A4RG	56731	0.7326	0.0165	SLC2A4 regulator							SLC2A4RG	0.7326
379	APOL1	8542	0.7321	0.0204	apolipoprotein L, 1							APOL1	0.7321
380	IL6	3569	0.7314	0.0137	interleukin 6 (interferon, beta 2)							IL6	0.7314
381	ACAA2	10449	0.7311	0.0068	acetyl-CoA acyltransferase 2							ACAA2	0.7311
382	NDUFA4L2	56901	0.7297	0.0013	NADH dehydrogenase (ubiquinone) 1 alpha subcomplex, 4-like 2							NDUFA4L2	0.7297
383	PARP9	83666	0.7288	0.0404	poly (ADP-ribose) polymerase family, member 9							PARP9	0.7288
384	TMEM8A	58986	0.7281	0.0437	transmembrane protein 8A							TMEM8A	0.7281
385	GPR56	9289	0.7279	0.003	G protein-coupled receptor 56							GPR56	0.7279
386	GBP1	2633	0.7276	0.0342	guanylate binding protein 1, interferon-inducible							GBP1	0.7276
387	ACTN4	81	0.7276	0.0298	actinin, alpha 4							ACTN4	0.7276
388	HLA-G	3135	0.7275	0.0228	major histocompatibility complex, class I, G							HLA-G	0.7275
389	A2M	2	0.7273	0.021	alpha-2-macroglobulin							A2M	0.7273
390	CDC42EP5	148170	0.727	0.0099	CDC42 effector protein (Rho GTPase binding) 5							CDC42EP5	0.727
391	EMILIN2	84034	0.7269	0.0106	elastin microfibril interfacer 2							EMILIN2	0.7269
392	SLC12A4	6560	0.7262	0.0483	solute carrier family 12 (potassium/chloride transporters), member 4							SLC12A4	0.7262
393	ID3	3399	0.7262	0.0017	inhibitor of DNA binding 3, dominant negative helix-loop-helix protein							ID3	0.7262
394	PVR	5817	0.724	0.0402	poliovirus receptor							PVR	0.724
395	MOB3C	148932	0.7236	0.0116	MOB kinase activator 3C							MOB3C	0.7236
396	MGP	4256	0.7234	0.0126	matrix Gla protein							MGP	0.7234
397	CASP1	834	0.7232	0.0367	caspase 1, apoptosis-related cysteine peptidase							CASP1	0.7232
398	RARRES3	5920	0.723	0.0268	retinoic acid receptor responder (tazarotene induced) 3							RARRES3	0.723
399	SLC35A4	113829	0.7227	0.0421	solute carrier family 35, member A4							SLC35A4	0.7227
400	ANO6	196527	0.722	0.0535	anoctamin 6							ANO6	0.722
401	E2F4	1874	0.7219	0.0714	E2F transcription factor 4, p107/p130-binding							E2F4	0.7219
402	ST6GALNAC4	27090	0.7211	0.0105	ST6 (alpha-N-acetyl-neuraminyl-2,3-beta-galactosyl-1,3)-N-acetylgalactosaminide alpha-2,6-sialyltransferase 4							ST6GALNAC4	0.7211
403	DDAH2	23564	0.7206	0.0162	dimethylarginine dimethylaminohydrolase 2							DDAH2	0.7206
404	MFNG	4242	0.7197	0.017	MFNG O-fucosylpeptide 3-beta-N-acetylglucosaminyltransferase							MFNG	0.7197
405	TTC38	55020	0.7189	0.0049	tetratricopeptide repeat domain 38							TTC38	0.7189
406	DTX3L	151636	0.7188	0.0402	deltex 3-like (Drosophila)							DTX3L	0.7188
407	PTTG1IP	754	0.7182	0.0395	pituitary tumor-transforming 1 interacting protein							PTTG1IP	0.7182
408	ECSCR	641700	0.7181	0.0136	endothelial cell surface expressed chemotaxis and apoptosis regulator							ECSCR	0.7181
409	HSF4	3299	0.7163	0.0857	heat shock transcription factor 4							HSF4	0.7163
410	GATAD2A	54815	0.7162	0.0191	GATA zinc finger domain containing 2A							GATAD2A	0.7162
411	TSPO	706	0.7154	0.0482	translocator protein (18kDa)							TSPO	0.7154
412	NFATC4	4776	0.7149	0.0958	nuclear factor of activated T-cells, cytoplasmic, calcineurin-dependent 4							NFATC4	0.7149
413	MYO1F	4542	0.7144	0.0428	myosin IF							MYO1F	0.7144
414	C15ORF39	56905	0.7142	0.0226	chromosome 15 open reading frame 39							C15ORF39	0.7142
415	NXN	64359	0.7135	0.0053	nucleoredoxin							NXN	0.7135
416	ORAI1	84876	0.713	0.0124	ORAI calcium release-activated calcium modulator 1							ORAI1	0.713
417	AGTRAP	57085	0.7128	0.0305	angiotensin II receptor-associated protein							AGTRAP	0.7128
418	STX11	8676	0.7126	0.0259	syntaxin 11							STX11	0.7126
419	ALDH3B1	221	0.7126	0.0365	aldehyde dehydrogenase 3 family, member B1							ALDH3B1	0.7126
420	COL4A1	1282	0.7122	0.0267	collagen, type IV, alpha 1							COL4A1	0.7122
421	PYGL	5836	0.712	0.0059	phosphorylase, glycogen, liver							PYGL	0.712
422	PIM1	5292	0.7118	0.0036	pim-1 oncogene							PIM1	0.7118
423	ANPEP	290	0.7118	0.0052	alanyl (membrane) aminopeptidase							ANPEP	0.7118
424	LYL1	4066	0.7115	0.0366	lymphoblastic leukemia derived sequence 1							LYL1	0.7115
425	CD74	972	0.7112	0.0335	CD74 molecule, major histocompatibility complex, class II invariant chain							CD74	0.7112
426	SERPINB6	5269	0.7112	0.015	serpin peptidase inhibitor, clade B (ovalbumin), member 6							SERPINB6	0.7112
427	KIF1C	10749	0.7104	0.019	kinesin family member 1C							KIF1C	0.7104
428	ERBB2	2064	0.7099	0.0207	v-erb-b2 erythroblastic leukemia viral oncogene homolog 2, neuro/glioblastoma derived oncogene homolog (avian)							ERBB2	0.7099
429	IRF7	3665	0.7098	0.0264	interferon regulatory factor 7							IRF7	0.7098
430	IGFBP5	3488	0.7096	0.0299	insulin-like growth factor binding protein 5							IGFBP5	0.7096
431	TNFRSF14	8764	0.7092	0.0317	tumor necrosis factor receptor superfamily, member 14							TNFRSF14	0.7092
432	ADM	133	0.709	0.0107	adrenomedullin							ADM	0.709
433	PDLIM4	8572	0.7088	0.015	PDZ and LIM domain 4							PDLIM4	0.7088
434	FOSL1	8061	0.7087	0.0249	FOS-like antigen 1							FOSL1	0.7087
435	PKN3	29941	0.7086	0.0066	protein kinase N3							PKN3	0.7086
436	HYAL1	3373	0.7086	0.0074	hyaluronoglucosaminidase 1							HYAL1	0.7086
437	ELTD1	64123	0.7078	0.0175	EGF, latrophilin and seven transmembrane domain containing 1							ELTD1	0.7078
438	RAB20	55647	0.7076	0.0074	RAB20, member RAS oncogene family							RAB20	0.7076
439	EBI3	10148	0.7076	0.0186	Epstein-Barr virus induced 3							EBI3	0.7076
440	ARSD	414	0.7072	0.0161	arylsulfatase D							ARSD	0.7072
441	ACSF2	80221	0.707	0.0164	acyl-CoA synthetase family member 2							ACSF2	0.707
442	NEDD9	4739	0.7063	0.0069	neural precursor cell expressed, developmentally down-regulated 9							NEDD9	0.7063
443	CD40	958	0.7059	0.0167	CD40 molecule, TNF receptor superfamily member 5							CD40	0.7059
444	SOD3	6649	0.7054	0.05	superoxide dismutase 3, extracellular							SOD3	0.7054
445	MMP9	4318	0.7051	0.0094	matrix metallopeptidase 9 (gelatinase B, 92kDa gelatinase, 92kDa type IV collagenase)							MMP9	0.7051
446	LY96	23643	0.7051	0.0512	lymphocyte antigen 96							LY96	0.7051
447	PPARD	5467	0.7047	0.0091	peroxisome proliferator-activated receptor delta							PPARD	0.7047
448	CSPG4	1464	0.7044	0.0124	chondroitin sulfate proteoglycan 4							CSPG4	0.7044
449	PPARA	5465	0.7042	0.0102	peroxisome proliferator-activated receptor alpha							PPARA	0.7042
450	RASIP1	54922	0.7032	0.0039	Ras interacting protein 1							RASIP1	0.7032
451	UBTD1	80019	0.703	0.0558	ubiquitin domain containing 1							UBTD1	0.703
452	SASH3	54440	0.7029	0.0427	SAM and SH3 domain containing 3							SASH3	0.7029
453	SCARB1	949	0.7019	0.0124	scavenger receptor class B, member 1							SCARB1	0.7019
454	GPRC5A	9052	0.7002	0.0163	G protein-coupled receptor, family C, group 5, member A							GPRC5A	0.7002
455	CAPG	822	0.6997	0.0325	capping protein (actin filament), gelsolin-like							CAPG	0.6997
456	EMP1	2012	0.6987	0.0281	epithelial membrane protein 1							EMP1	0.6987
457	TFPI	7035	0.6982	0.0164	tissue factor pathway inhibitor (lipoprotein-associated coagulation inhibitor)							TFPI	0.6982
458	APOC2	344	0.6971	0.0071	apolipoprotein C-II							APOC2	0.6971
459	CLEC2B	9976	0.6965	0.0195	C-type lectin domain family 2, member B							CLEC2B	0.6965
460	KANK2	25959	0.6961	0.0236	KN motif and ankyrin repeat domains 2							KANK2	0.6961
461	METRNL	284207	0.6958	0.024	meteorin, glial cell differentiation regulator-like							METRNL	0.6958
462	EPSTI1	94240	0.6951	0.0249	epithelial stromal interaction 1 (breast)							EPSTI1	0.6951
463	MAPKAPK2	9261	0.6951	0.0362	mitogen-activated protein kinase-activated protein kinase 2							MAPKAPK2	0.6951
464	ITPKC	80271	0.6938	0.029	inositol-trisphosphate 3-kinase C							ITPKC	0.6938
465	IKBKE	9641	0.6937	0.0194	inhibitor of kappa light polypeptide gene enhancer in B-cells, kinase epsilon							IKBKE	0.6937
466	LRCH4	4034	0.6935	0.101	leucine-rich repeats and calponin homology (CH) domain containing 4							LRCH4	0.6935
467	LSR	51599	0.6933	0.0098	lipolysis stimulated lipoprotein receptor							LSR	0.6933
468	ARHGDIB	397	0.6929	0.0281	Rho GDP dissociation inhibitor (GDI) beta							ARHGDIB	0.6929
469	SLC7A2	6542	0.6927	0.002	solute carrier family 7 (cationic amino acid transporter, y+ system), member 2							SLC7A2	0.6927
470	BACE2	25825	0.6926	0.0025	beta-site APP-cleaving enzyme 2							BACE2	0.6926
471	IGFBP3	3486	0.6923	0.0087	insulin-like growth factor binding protein 3							IGFBP3	0.6923
472	CDC42EP4	23580	0.6921	0.0095	CDC42 effector protein (Rho GTPase binding) 4							CDC42EP4	0.6921
473	ALAS2	212	0.6919	0.0069	aminolevulinate, delta-, synthase 2							ALAS2	0.6919
474	C1RL	51279	0.6915	0.0239	complement component 1, r subcomponent-like							C1RL	0.6915
475	LMF2	91289	0.6909	0.1137	lipase maturation factor 2							LMF2	0.6909
476	FBRS	64319	0.6908	0.0765	fibrosin							FBRS	0.6908
477	NRP2	8828	0.6906	0.0351	neuropilin 2							NRP2	0.6906
478	TMEM106A	113277	0.6906	0.0082	transmembrane protein 106A							TMEM106A	0.6906
479	TINAGL1	64129	0.6903	0.0094	tubulointerstitial nephritis antigen-like 1							TINAGL1	0.6903
480	ANG	283	0.6903	0.0154	angiogenin, ribonuclease, RNase A family, 5							ANG	0.6903
481	PTP4A3	11156	0.6902	0.0043	protein tyrosine phosphatase type IVA, member 3							PTP4A3	0.6902
482	DOCK5	80005	0.69	0.0165	dedicator of cytokinesis 5							DOCK5	0.69
483	MRVI1	10335	0.6896	0.0282	murine retrovirus integration site 1 homolog							MRVI1	0.6896
484	AEBP1	165	0.689	0.0292	AE binding protein 1							AEBP1	0.689
485	LAIR1	3903	0.689	0.038	leukocyte-associated immunoglobulin-like receptor 1							LAIR1	0.689
486	DTX2P1-UPK3BP1-PMS2P11	441263	0.6888	0.1034	DTX2P1-UPK3BP1-PMS2P11 readthrough (non-protein coding)							DTX2P1-UPK3BP1-PMS2P11	0.6888
487	GLI3	2737	0.6888	0.0254	GLI family zinc finger 3							GLI3	0.6888
488	FLNB	2317	0.6888	0.0108	filamin B, beta							FLNB	0.6888
489	SNTA1	6640	0.6886	0.0462	syntrophin, alpha 1							SNTA1	0.6886
490	ATOH8	84913	0.6883	0.0084	atonal homolog 8 (Drosophila)							ATOH8	0.6883
491	MAP2K3	5606	0.6882	0.0245	mitogen-activated protein kinase kinase 3							MAP2K3	0.6882
492	FLNC	2318	0.6878	0.0189	filamin C, gamma							FLNC	0.6878
493	FAM107A	11170	0.6872	0.0412	family with sequence similarity 107, member A							FAM107A	0.6872
494	CAV1	857	0.6871	0.0248	caveolin 1, caveolae protein, 22kDa							CAV1	0.6871
495	ALDH4A1	8659	0.6859	0.0154	aldehyde dehydrogenase 4 family, member A1							ALDH4A1	0.6859
496	HIF3A	64344	0.6855	0.1163	hypoxia inducible factor 3, alpha subunit							HIF3A	0.6855
497	SLC39A8	64116	0.6855	0.0023	solute carrier family 39 (zinc transporter), member 8							SLC39A8	0.6855
498	HMOX1	3162	0.6848	0.0181	heme oxygenase (decycling) 1							HMOX1	0.6848
499	FURIN	5045	0.6847	0.0657	furin (paired basic amino acid cleaving enzyme)							FURIN	0.6847
500	LGALS9	3965	0.6845	0.0298	lectin, galactoside-binding, soluble, 9							LGALS9	0.6845
501	SERTAD3	29946	0.6843	0.0053	SERTA domain containing 3							SERTAD3	0.6843
502	COMT	1312	0.6842	0.0387	catechol-O-methyltransferase							COMT	0.6842
503	EIF4EBP1	1978	0.6834	0.0259	eukaryotic translation initiation factor 4E binding protein 1							EIF4EBP1	0.6834
504	ZNF395	55893	0.6833	0.0171	zinc finger protein 395							ZNF395	0.6833
505	LATS2	26524	0.6831	0.0362	LATS, large tumor suppressor, homolog 2 (Drosophila)							LATS2	0.6831
506	SERPINB1	1992	0.6827	0.0333	serpin peptidase inhibitor, clade B (ovalbumin), member 1							SERPINB1	0.6827
507	CRTAP	10491	0.6822	0.0233	cartilage associated protein							CRTAP	0.6822
508	TNIP2	79155	0.6817	0.0278	TNFAIP3 interacting protein 2							TNIP2	0.6817
509	PLD2	5338	0.6813	0.0641	phospholipase D2							PLD2	0.6813
510	BCAM	4059	0.6808	0.0961	basal cell adhesion molecule (Lutheran blood group)							BCAM	0.6808
511	EGFR	1956	0.6804	0.0416	epidermal growth factor receptor							EGFR	0.6804
512	ALPK1	80216	0.6801	0.0286	alpha-kinase 1							ALPK1	0.6801
513	UBA7	7318	0.68	0.0638	ubiquitin-like modifier activating enzyme 7							UBA7	0.68
514	ARHGEF1	9138	0.6797	0.0733	Rho guanine nucleotide exchange factor (GEF) 1							ARHGEF1	0.6797
515	CLIC4	25932	0.6797	0.0494	chloride intracellular channel 4							CLIC4	0.6797
516	RTEL1	51750	0.6794	0.0919	regulator of telomere elongation helicase 1							RTEL1	0.6794
517	CLCN7	1186	0.679	0.1075	chloride channel, voltage-sensitive 7							CLCN7	0.679
518	ANGPT2	285	0.6788	0.0013	angiopoietin 2							ANGPT2	0.6788
519	NUPR1	26471	0.6777	0.0197	nuclear protein, transcriptional regulator, 1							NUPR1	0.6777
520	CNN2	1265	0.6774	0.02	calponin 2							CNN2	0.6774
521	TAF10	6881	0.6769	0.0599	TAF10 RNA polymerase II, TATA box binding protein (TBP)-associated factor, 30kDa							TAF10	0.6769
522	NNMT	4837	0.6769	0.0298	nicotinamide N-methyltransferase							NNMT	0.6769
523	TMEM173	340061	0.6767	0.0257	transmembrane protein 173							TMEM173	0.6767
524	TMEM109	79073	0.6765	0.0346	transmembrane protein 109							TMEM109	0.6765
525	ZFHX3	463	0.6765	0.0136	zinc finger homeobox 3							ZFHX3	0.6765
526	MCL1	4170	0.6758	0.0511	myeloid cell leukemia sequence 1 (BCL2-related)							MCL1	0.6758
527	BTG2	7832	0.6756	0.0173	BTG family, member 2							BTG2	0.6756
528	LEF1	51176	0.6751	0.0033	lymphoid enhancer-binding factor 1							LEF1	0.6751
529	S100A4	6275	0.6746	0.0287	S100 calcium binding protein A4							S100A4	0.6746
530	EMILIN1	11117	0.6745	0.0404	elastin microfibril interfacer 1							EMILIN1	0.6745
531	ERG	2078	0.6742	0.0127	v-ets erythroblastosis virus E26 oncogene homolog (avian)							ERG	0.6742
532	FZD4	8322	0.6737	0.0295	frizzled family receptor 4							FZD4	0.6737
533	NR1H2	7376	0.6736	0.08	nuclear receptor subfamily 1, group H, member 2							NR1H2	0.6736
534	NAGA	4668	0.6736	0.0367	N-acetylgalactosaminidase, alpha-							NAGA	0.6736
535	VIM	7431	0.6732	0.0507	vimentin							VIM	0.6732
536	EFNA1	1942	0.6732	0.008	ephrin-A1							EFNA1	0.6732
537	PRIC285	85441	0.6731	0.0468	peroxisomal proliferator-activated receptor A interacting complex 285							PRIC285	0.6731
538	MSRB3	253827	0.6728	0.0363	methionine sulfoxide reductase B3							MSRB3	0.6728
539	THSD4	79875	0.6728	0.0184	thrombospondin, type I, domain containing 4							THSD4	0.6728
540	ZFP36L2	678	0.6724	0.0138	zinc finger protein 36, C3H type-like 2							ZFP36L2	0.6724
541	NQO1	1728	0.6722	0.0048	NAD(P)H dehydrogenase, quinone 1							NQO1	0.6722
542	GSN	2934	0.6718	0.056	gelsolin							GSN	0.6718
543	CFH	3075	0.6713	0.0275	complement factor H							CFH	0.6713
544	NAALADL1	10004	0.671	0.0188	N-acetylated alpha-linked acidic dipeptidase-like 1							NAALADL1	0.671
545	GBP4	115361	0.6708	0.0216	guanylate binding protein 4							GBP4	0.6708
546	TK1	7083	0.6707	0.0674	thymidine kinase 1, soluble							TK1	0.6707
547	FAM100B	283991	0.6706	0.0146	family with sequence similarity 100, member B							FAM100B	0.6706
548	GBGT1	26301	0.6705	0.0153	globoside alpha-1,3-N-acetylgalactosaminyltransferase 1							GBGT1	0.6705
549	BEST1	7439	0.6701	0.0913	bestrophin 1							BEST1	0.6701
550	TNIP1	10318	0.6701	0.0434	TNFAIP3 interacting protein 1							TNIP1	0.6701
551	CLCF1	23529	0.67	0.0435	cardiotrophin-like cytokine factor 1							CLCF1	0.67
552	CXCL16	58191	0.6696	0.0264	chemokine (C-X-C motif) ligand 16							CXCL16	0.6696
553	CD82	3732	0.6694	0.023	CD82 molecule							CD82	0.6694
554	ASAP3	55616	0.6693	0.0331	ArfGAP with SH3 domain, ankyrin repeat and PH domain 3							ASAP3	0.6693
555	YBX1	4904	0.668	0.0226	Y box binding protein 1							YBX1	0.668
556	MAP3K8	1326	0.6679	0.0309	mitogen-activated protein kinase kinase kinase 8							MAP3K8	0.6679
557	NFATC1	4772	0.6675	0.0144	nuclear factor of activated T-cells, cytoplasmic, calcineurin-dependent 1							NFATC1	0.6675
558	FOXF1	2294	0.6669	0.005	forkhead box F1							FOXF1	0.6669
559	UNC93B1	81622	0.6664	0.026	unc-93 homolog B1 (C. elegans)							UNC93B1	0.6664
560	MT1H	4496	0.6657	0.0035	metallothionein 1H							MT1H	0.6657
561	KEL	3792	0.6656	0.0379	Kell blood group, metallo-endopeptidase							KEL	0.6656
562	PSME2	5721	0.6656	0.0349	proteasome (prosome, macropain) activator subunit 2 (PA28 beta)							PSME2	0.6656
[truncated: 17,294 more rows]

## Sheet: ATF3
Query genes:
[truncated: 17,860 more rows]

## Sheet: RCN3
Query genes:
[truncated: 17,860 more rows]

[truncated: 2 more sheets: ITPR3, analysis]
