# Supplementary material for: Identification of novel key markers that are induced during traumatic brain injury in mice
Source: PeerJ. 2023 Aug 25;11:e15981. doi: 10.7717/peerj.15981 (PMC10461542; doi:10.7717/peerj.15981)
Supplement: Supplemental Information 7 [file peerj-11-15981-s007.xlsx]

## Sheet: Sheet1
				Age	Gender	Diagnosis	GCS Scores	APECHEII Scores	D dimer	Base excess	Hemoglobin	Leucocyte	C-reactive protein	Hematocrit(%)	Systolic blood pressure	Diastolic blood pressure	pH	PaO2	PaCO2	HCO3-	Hypertension	Diabetes
			1	40	male	cerebral hemorrhage	5	22	0.51	-3.7	167	23.65	4.55	50	220	111	7.43	72	30	19.3	YES	NO
			2	55	male	traumatic subarachnoid hemorrhage	8	20	7.7	-4.1	134	10.95	1.81	39.2	138	72	7.31	162	44	22.2	NO	NO
			3	69	female	ventricular hemorrhage	5	19	2.51	-2.4	129	7.23	0.56	129	166	100	7.38	76	38	22.3	YES	YES
			4	55	male	severe brain injury	6	17	95.22	-4.3	96	17.08	1.04	27.9	131	56	7.32	111	42	21.6	NO	NO
			5	42	male	severe brain injury	3	20	8.09	4.3	79	21.98	156.56	24	97	62	7.56	114	30	26.6	NO	NO
			6	53	female	ischemic hypoxic encephalopathy	3	21	4.45	4	111	11.56	8.92	35.1	136	61	7.49	169	36	27.4	NO	NO
			7	68	male	cerebral contusion	6	26	66.91	0.1	124	16.01	0.2	37.1	104	62	7.25	381	66	28.9	YES	YES
			8	65	male	traumatic subarachnoid hemorrhage	11	34	31.79	-2.4	132	15.61	8.72	37.6	160	90	7.42	126	33	23.1	YES	YES
			9	46	male	basal ganglia hemorrhage	13	15	21.56	-1.7	0.12	8.78	2	45.2	140	80	7.39	114	38	23	YES	NO
			10	77	female	cerebral hemorrhage	9	19	0.726	3.5	110	10.93	0.4	32.8	189	43	7.42	184	44	27.7	YES	NO
			11	76	male	brainstem infarction	13	25	0.84	-7.5	126	11.73	2.51	38.6	156	90	7.4	105	26	16.1	YES	NO
			12	37	male	brainstem hemorrhage	6	22	0.27	-1.3	146	10.57	6.38	43.1	129	78	7.36	103	43	24.3	YES	NO
